# Supplementary material for: A specific role for importin-5 and NASP in the import and nuclear hand-off of monomeric H3
Source: eLife. 2022 Sep 6;11:e81755. doi: 10.7554/eLife.81755 (PMC9560165; doi:10.7554/eLife.81755)
Supplement: Figure 2—source data 1. — Limma linear model coefficients of normalised total precursor intensity used in Figure 2A, B and E. [file elife-81755-fig2-data1.xlsx]

## Sheet: MS_H3_co_IP
Figure 2—Source Data 1. MS data for H3_EGFP CoIP
						Linear model coeff log 2(Normalised total precursor intensity)			linear model fit to determine significant changes (correcred p-val < 0.05). 1 Increase compared to control, -1 decreased compared to control		Adjusted p-value (Benjamini & Hochberg 1995)		Normalised total precursor intensity									Exclusive unique peptide count
	Identified.Proteins..307.	Accession.Number	Alternate.ID	Molecular.Weight	Protein.Grouping.Ambiguity	H3_WT	H3_HB	H3_FD	H3_HB-H3_WT	H3_FD-H3_WT	H3_HB-H3_WT	H3_FD-H3_WT	H3_WT_1	H3_WT_2	H3_WT_3	H3_HB_1	H3_HB_2	H3_HB_3	H3_FD_1	H3_FD_2	H3_FD_3	H3_WT_1	H3_WT_2	H3_WT_3	H3_HB_1	H3_HB_2	H3_HB_3	H3_FD_1	H3_FD_2	H3_FD_3
1	Cluster of Nuclear autoantigenic sperm protein OS=Homo sapiens OX=9606 GN=NASP PE=1 SV=2 (P49321)	P49321 [2]	NASP	85 kDa	TRUE	10.6592	11.3544	10.9132	0	0	0.305781	0.710046	127000000	105000000	115000000	163000000	167000000	138000000	108000000	143000000	128000000	51	52	53	54	52	51	58	56	53
2	Cluster of H3_EGFP_Bait	CL1315 [4]	Cluster_of_CL1315	44 kDa	TRUE	10.885	11.0739	11.371	0	0	0.843187	0.536361	140000000	112000000	155000000	138000000	113000000	134000000	154000000	191000000	174000000	27	23	24	21	22	23	23	20	19
3	Isoform 2 of Importin-5 OS=Homo sapiens OX=9606 GN=IPO5	O00410-2	IPO5	117 kDa	TRUE	9.7951	10.6969	10.6635	0	0	0.133472	0.190564	55700000	70500000	63700000	87000000	108000000	103000000	111000000	118000000	91100000	41	45	42	44	45	43	47	46	44
4	Cluster of Heat shock 70 kDa protein 1B OS=Homo sapiens OX=9606 GN=HSPA1B PE=1 SV=1 (A0A0G2JIW1)	A0A0G2JIW1 [3]	HSPA1B	70 kDa	TRUE	10.622	10.7051	11.2657	0	0	0.870094	0.204157	117000000	123000000	100000000	97100000	127000000	80900000	161000000	199000000	131000000	24	24	24	22	24	24	24	24	24
5	CON__P00761	CON__P00761	CON__P00761	?	TRUE	12.6311	12.3003	13.0843	0	0	0.746909	0.640949	633000000	336000000	454000000	303000000	291000000	295000000	445000000	559000000	708000000	9	8	9	10	9	10	10	8	8
6	Cluster of Putative E3 ubiquitin-protein ligase UBR7 OS=Homo sapiens OX=9606 GN=UBR7 PE=1 SV=2 (Q8N806)	Q8N806	UBR7	48 kDa	TRUE	9.60921	9.64674	8.76469	0	0	0.966819	0.275945	52200000	52700000	60800000	39400000	46300000	60800000	32300000	23800000	29400000	18	21	21	19	20	16	15	16	16
7	Heat shock 70 kDa protein 6 OS=Homo sapiens OX=9606 GN=HSPA6 PE=1 SV=2	P17066	HSPA6	71 kDa	TRUE	8.73934	10.4312	10.2813	0	0	0.103635	0.185385	31900000	32600000	26400000	69700000	153000000	54200000	53700000	67200000	140000000	6	10	8	1	1	1	6	6	3
8	Cluster of Importin-4 OS=Homo sapiens OX=9606 GN=IPO4 PE=1 SV=2 (Q8TEX9)	Q8TEX9 [2]	IPO4	119 kDa	TRUE	10.1945	5.53058	5.88339	-1	-1	6.0348e-05	9.76542e-05	71400000	87400000	92000000	2635500	2925200	3102800	5730000	4791500	2196300	42	42	42	4	2	2	15	14	8
9	Cluster of Complement component 1 Q subcomponent-binding protein, mitochondrial OS=Homo sapiens OX=9606 GN=C1QBP PE=1 SV=1 (Q07021)	Q07021	C1QBP	31 kDa	TRUE	11.1712	11.5646	11.4062	0	0	0.606654	0.735776	165000000	204000000	137000000	210000000	159000000	172000000	316000000	325000000	59500000	7	6	7	7	6	7	7	7	7
10	Histone H4 OS=Homo sapiens OX=9606 GN=H4C1 PE=1 SV=2	P62805	H4C1	11 kDa	NA	11.2681	7.42413	7.39436	-1	-1	0.000681966	0.000776972	164000000	279000000	126000000	10500000	10200000	10900000	10400000	7177400	16900000	7	7	7	4	4	4	4	4	4
11	Cluster of Histone-binding protein RBBP7 OS=Homo sapiens OX=9606 GN=RBBP7 PE=1 SV=1 (Q16576)	Q16576 [2]	RBBP7	48 kDa	TRUE	9.13673	6.67311	6.84463	-1	-1	0.00258828	0.0043017	33000000	38000000	48900000	6477600	6146600	6285800	6767200	9384000	6730400	13	14	13	6	6	4	5	6	5
12	Cluster of Nucleosome assembly protein 1-like 1 OS=Homo sapiens OX=9606 GN=NAP1L1 PE=1 SV=1 (F8VV59)	F8VV59 [7]	NAP1L1	38 kDa	TRUE	9.65968	10.1423	10.4042	0	0	0.606654	0.402963	50000000	46100000	78800000	36700000	95000000	88500000	123000000	113000000	51900000	13	13	12	13	14	13	13	12	9
13	Cluster of Heat shock cognate 71 kDa protein OS=Homo sapiens OX=9606 GN=HSPA8 PE=1 SV=1 (P11142)	P11142 [2]	HSPA8	71 kDa	TRUE	8.12855	7.95457	8.72569	0	0	0.719509	0.230973	19800000	19200000	19700000	15900000	17100000	12900000	27900000	28500000	26500000	14	16	15	15	15	15	18	18	16
14	Insulin receptor substrate 4 OS=Homo sapiens OX=9606 GN=IRS4 PE=1 SV=1	O14654	IRS4	134 kDa	NA	6.005	7.06715	6.00154	1	0	0.00505196	0.991686	4607000	4669500	4039300	9297600	7752700	7807900	4634300	5160200	3147200	23	26	23	28	34	28	21	18	16
15	Cluster of Histone-binding protein RBBP4 OS=Homo sapiens OX=9606 GN=RBBP4 PE=1 SV=3 (Q09028)	Q09028 [3]	RBBP4	48 kDa	TRUE	9.23764	6.47008	6.908	-1	-1	0.000414892	0.00132133	40000000	41700000	46000000	5147700	6313100	5107600	7045700	11200000	6257600	11	13	13	3	4	4	4	5	5
16	Cluster of Tubulin beta chain OS=Homo sapiens OX=9606 GN=TUBB PE=1 SV=2 (P07437)	P07437 [5]	TUBB	50 kDa	TRUE	7.80152	8.5828	7.50223	1	0	0.0114633	0.264986	16000000	21400000	11400000	22500000	25000000	22500000	13900000	13800000	8856900	22	22	20	23	24	22	18	19	16
17	Cluster of Tubulin alpha-1B chain OS=Homo sapiens OX=9606 GN=TUBA1B PE=1 SV=1 (P68363)	P68363 [4]	TUBA1B	50 kDa	TRUE	8.3676	8.91112	7.76609	0	0	0.238413	0.207251	23800000	29400000	18200000	27900000	32800000	27200000	11200000	17000000	15000000	15	16	15	17	18	17	15	15	14
18	Cluster of Histone deacetylase 6 OS=Homo sapiens OX=9606 GN=HDAC6 PE=1 SV=2 (Q9UBN7)	Q9UBN7	HDAC6	131 kDa	TRUE	7.85927	8.18968	7.88178	0	0	0.557364	0.969822	13400000	17200000	18300000	18300000	17700000	17400000	18900000	15000000	13000000	16	16	14	15	17	18	13	14	13
19	Cluster of Heterogeneous nuclear ribonucleoprotein M OS=Homo sapiens OX=9606 GN=HNRNPM PE=1 SV=3 (P52272)	P52272	HNRNPM	78 kDa	TRUE	5.47868	6.37617	5.93672	1	0	0.0142531	0.204157	2870700	4372200	2342000	5643600	5967700	4092100	4639800	5550800	2593100	17	18	14	21	21	20	16	20	15
20	Endoplasmic reticulum chaperone BiP OS=Homo sapiens OX=9606 GN=HSPA5 PE=1 SV=2	P11021	HSPA5	72 kDa	TRUE	6.67018	7.26503	7.27827	0	0	0.181517	0.207251	7223700	6824800	7068200	9369000	9471100	9507900	9986800	10800000	9670800	15	15	17	15	17	17	20	17	18
21	Cluster of Mannosyl-oligosaccharide glucosidase OS=Homo sapiens OX=9606 GN=MOGS PE=1 SV=5 (Q13724)	Q13724	MOGS	92 kDa	TRUE	7.47807	6.34006	6.72746	-1	0	0.0479599	0.207251	11900000	11400000	13900000	5465300	5111400	4544500	9135500	9954000	3848900	24	23	24	10	12	10	18	21	8
22	Nucleosome assembly protein 1-like 4 OS=Homo sapiens OX=9606 GN=NAP1L4 PE=1 SV=1	Q99733 (+1)	NAP1L4	43 kDa	TRUE	8.23772	9.66568	9.09613	0	0	0.0545565	0.230973	16500000	23200000	24400000	34900000	56100000	59200000	44200000	60300000	18200000	12	13	13	12	13	13	12	13	11
23	Cluster of 60S ribosomal protein L3 OS=Homo sapiens OX=9606 GN=RPL3 PE=1 SV=2 (P39023)	P39023	RPL3	46 kDa	TRUE	7.28376	7.6575	7.88881	0	0	0.411407	0.207251	8794400	15500000	9499100	10400000	18600000	9933300	14100000	20200000	13200000	9	11	8	11	11	8	12	12	9
24	60S ribosomal protein L4 OS=Homo sapiens OX=9606 GN=RPL4 PE=1 SV=5	P36578	RPL4	48 kDa	NA	7.63615	8.08967	7.91928	0	0	0.173154	0.39457	15000000	15000000	12000000	16100000	19400000	14800000	14800000	23700000	11600000	11	12	12	13	12	12	13	14	11
25	Cluster of Y-box-binding protein 1 OS=Homo sapiens OX=9606 GN=YBX1 PE=1 SV=3 (P67809)	P67809 [2]	YBX1	36 kDa	TRUE	6.20748	6.59567	6.68788	0	0	0.295808	0.207251	5701000	5994400	3958600	6904700	7485800	4212100	7075500	6617100	6515700	11	13	13	10	13	12	14	15	9
26	Cluster of Nucleolin OS=Homo sapiens OX=9606 GN=NCL PE=1 SV=3 (P19338)	P19338	NCL	77 kDa	TRUE	7.54147	7.74221	7.63422	0	0	0.609347	0.796341	11600000	18600000	10400000	14000000	13200000	12200000	10900000	21100000	9779800	12	13	12	13	16	12	15	16	12
27	Cluster of Importin-5 (Fragment) OS=Homo sapiens OX=9606 GN=IPO5 PE=1 SV=2 (E7EX05)	E7EX05	IPO5	11 kDa	TRUE	10.5476	11.7442	11.1242	0	0	0.0605646	0.366739	93600000	136000000	96900000	169000000	238000000	207000000	126000000	325000000	80000000	5	5	5	5	5	5	5	5	5
28	Cluster of Elongation factor 1-alpha 1 OS=Homo sapiens OX=9606 GN=EEF1A1 PE=1 SV=1 (P68104)	P68104	EEF1A1	50 kDa	TRUE	7.76714	8.02517	7.99018	0	0	0.528306	0.553581	21000000	16800000	10300000	19300000	16700000	12600000	19400000	16000000	14800000	12	11	11	10	11	11	9	12	12
29	Cluster of CTP synthase 1 OS=Homo sapiens OX=9606 GN=CTPS1 PE=1 SV=2 (P17812)	P17812	CTPS1	67 kDa	TRUE	5.69562	5.9518	6.03926	0	0	0.367526	0.230973	4229100	4391000	2506400	4430500	4009800	3232200	4548100	4562200	3852300	13	12	11	14	11	9	11	11	12
30	Cluster of 40S ribosomal protein S3 OS=Homo sapiens OX=9606 GN=RPS3 PE=1 SV=2 (P23396)	P23396	RPS3	27 kDa	TRUE	7.48334	7.85261	7.64177	0	0	0.321552	0.663225	16100000	15000000	8313100	14400000	17400000	11400000	17200000	19200000	7098100	12	13	10	13	9	12	11	13	9
31	E3 ubiquitin-protein ligase HUWE1 OS=Homo sapiens OX=9606 GN=HUWE1 PE=1 SV=3	Q7Z6Z7 (+2)	HUWE1	482 kDa	NA	4.25893	3.93268	2.61488	0	0	0.843187	0.241243	1383600	1376900	1161200	724020	1359500	924740	976060	939270	0	16	20	18	9	12	8	5	10	0
32	Cluster of Histone acetyltransferase type B catalytic subunit OS=Homo sapiens OX=9606 GN=HAT1 PE=1 SV=1 (O14929)	O14929	HAT1	50 kDa	TRUE	9.66528	6.33396	6.10868	-1	-1	2.1443e-05	1.30045e-05	62900000	66400000	46500000	5251000	4767200	4981600	3899600	5542200	4265900	12	13	12	3	4	4	3	2	3
33	60S ribosomal protein L6 OS=Homo sapiens OX=9606 GN=RPL6 PE=1 SV=3	Q02878	RPL6	33 kDa	NA	7.36623	7.80123	7.57726	0	0	0.126109	0.406989	12100000	17300000	7551100	12800000	16100000	12400000	14700000	14500000	9315700	9	10	11	11	10	10	11	11	9
34	Cluster of Plasminogen activator inhibitor 1 RNA-binding protein OS=Homo sapiens OX=9606 GN=SERBP1 PE=1 SV=2 (Q8NC51)	Q8NC51 [2]	SERBP1	45 kDa	TRUE	4.93698	4.86858	5.06382	0	0	0.889039	0.772248	2312600	2860300	1433900	2205200	2095200	1354700	2339200	3722700	1268200	12	12	10	11	11	11	10	13	10
35	Cluster of Stress-70 protein, mitochondrial OS=Homo sapiens OX=9606 GN=HSPA9 PE=1 SV=2 (P38646)	P38646	HSPA9	74 kDa	TRUE	5.6621	5.4503	5.87198	0	0	0.708708	0.710498	2848500	4470900	3321800	2381800	3078500	2778900	3913900	2986100	4675400	9	14	14	9	10	10	13	11	9
36	Cluster of 40S ribosomal protein S2 OS=Homo sapiens OX=9606 GN=RPS2 PE=1 SV=2 (P15880)	P15880	RPS2	31 kDa	TRUE	6.92458	7.02681	6.93104	0	0	0.846927	0.991686	9349600	13200000	5099900	7516100	12600000	5597300	6722300	10100000	7503700	8	10	7	8	9	8	9	8	4
37	60S ribosomal protein L15 OS=Homo sapiens OX=9606 GN=RPL15 PE=1 SV=2	P61313	RPL15	24 kDa	NA	6.27983	6.49398	6.61638	0	0	0.606654	0.397061	4805200	7673000	4284400	6313000	6447300	4317200	8839900	8972400	3506300	6	8	5	7	8	7	8	9	6
38	60S acidic ribosomal protein P0 OS=Homo sapiens OX=9606 GN=RPLP0 PE=1 SV=1	P05388	RPLP0	34 kDa	NA	8.07274	8.48758	8.48641	0	0	0.174533	0.207251	18500000	27300000	13700000	24100000	22200000	19500000	28100000	33900000	14100000	8	9	7	9	10	7	7	8	7
39	60S ribosomal protein L7 OS=Homo sapiens OX=9606 GN=RPL7 PE=1 SV=1	P18124	RPL7	29 kDa	NA	7.4395	7.65582	7.90662	0	0	0.543844	0.207251	11300000	15100000	10500000	12000000	15100000	10500000	14300000	19700000	13800000	9	8	5	7	8	8	8	9	5
40	Cluster of 40S ribosomal protein S3a OS=Homo sapiens OX=9606 GN=RPS3A PE=1 SV=2 (P61247)	P61247	RPS3A	30 kDa	TRUE	6.69718	6.89068	7.02598	0	0	0.606654	0.39457	6982000	8299200	6455700	5873600	8380900	7942900	9708600	9264300	6960100	10	9	10	8	8	9	9	10	7
41	60S ribosomal protein L7a OS=Homo sapiens OX=9606 GN=RPL7A PE=1 SV=2	P62424	RPL7A	30 kDa	NA	7.22095	7.75388	7.7826	0	0	0.0503359	0.0673697	11200000	14500000	7128900	13900000	17400000	9694800	15900000	18100000	10600000	12	14	11	12	12	11	12	9	9
42	Cluster of 40S ribosomal protein S4, X isoform OS=Homo sapiens OX=9606 GN=RPS4X PE=1 SV=2 (P62701)	P62701	RPS4X	30 kDa	TRUE	6.87325	7.58004	7.26323	0	0	0.0603205	0.286189	8874500	7876300	7681000	12300000	12300000	10700000	9387400	13200000	8295500	9	9	9	9	9	9	7	8	6
43	DnaJ homolog subfamily C member 10 OS=Homo sapiens OX=9606 GN=DNAJC10 PE=1 SV=2	Q8IXB1	DNAJC10	91 kDa	NA	5.73823	5.92536	5.72198	0	0	0.586662	0.964639	4427000	4679900	2468900	3794600	4712500	3057000	4529600	4103100	2288100	11	12	9	10	11	7	8	10	5
44	60S ribosomal protein L5 (Fragment) OS=Homo sapiens OX=9606 GN=RPL5 PE=1 SV=1	A0A2R8Y6J3 (+1)	RPL5	27 kDa	NA	7.22688	7.50107	7.64657	0	0	0.367184	0.207251	10700000	11300000	9407100	10700000	12900000	9998500	15700000	15100000	9679400	7	10	5	6	9	6	6	9	5
45	60S ribosomal protein L10a OS=Homo sapiens OX=9606 GN=RPL10A PE=1 SV=2	P62906	RPL10A	25 kDa	NA	6.98918	7.67489	7.88704	1	1	0.0080684	0.00209064	9326400	11900000	6373000	13000000	14200000	10700000	16400000	19900000	11600000	7	7	5	6	6	5	5	7	6
46	Cluster of 60S ribosomal protein L9 OS=Homo sapiens OX=9606 GN=RPL9 PE=1 SV=1 (P32969)	P32969	RPL9	22 kDa	TRUE	7.83675	8.11834	8.05347	0	0	0.39151	0.47848	15100000	21200000	13000000	16300000	22800000	13300000	21500000	18000000	13700000	6	8	7	7	7	7	7	8	4
47	Cluster of Histone chaperone ASF1B OS=Homo sapiens OX=9606 GN=ASF1B PE=1 SV=1 (Q9NVP2)	Q9NVP2	ASF1B	22 kDa	TRUE	9.80185	0.324504	0.320652	-1	-1	2.7094e-07	2.70129e-07	51100000	71400000	69100000	0	0	0	0	0	0	8	8	8	0	0	0	0	0	0
48	Thioredoxin OS=Homo sapiens OX=9606 GN=TXN PE=1 SV=3	P10599	TXN	12 kDa	NA	8.27911	8.64925	8.54644	0	0	0.48882	0.58917	20100000	25200000	20500000	22200000	21400000	30100000	26100000	28900000	19600000	7	7	4	6	6	6	6	6	7
49	Cluster of 60S ribosomal protein L23 OS=Homo sapiens OX=9606 GN=RPL23 PE=1 SV=1 (P62829)	P62829	RPL23	15 kDa	TRUE	6.66777	9.06098	7.34301	1	0	0.00123347	0.224377	8176200	9394300	4712900	31700000	36900000	29000000	7815600	11500000	13000000	7	6	7	7	6	7	5	6	3
50	60S ribosomal protein L12 OS=Homo sapiens OX=9606 GN=RPL12 PE=1 SV=1	P30050	RPL12	18 kDa	NA	7.84681	8.26057	7.89802	0	0	0.543844	0.94027	14100000	16800000	17400000	16000000	19700000	20600000	22500000	25100000	7182300	7	7	6	7	7	6	7	7	6
51	Nucleophosmin OS=Homo sapiens OX=9606 GN=NPM1 PE=1 SV=2	P06748 (+1)	NPM1	33 kDa	NA	6.60624	7.07122	6.7022	0	0	0.188319	0.771804	5756100	8559400	6268200	9005000	10700000	5994200	7352500	9138600	4833600	6	6	6	6	6	5	6	6	5
52	Cluster of 60S ribosomal protein L26 OS=Homo sapiens OX=9606 GN=RPL26 PE=1 SV=1 (P61254)	P61254 [2]	RPL26	17 kDa	TRUE	5.90762	6.3472	6.3371	0	0	0.222112	0.230973	4073700	4709300	3704000	5045800	6545900	3943200	7405300	6224900	3325000	8	8	6	8	8	7	5	8	6
53	Histone chaperone ASF1A OS=Homo sapiens OX=9606 GN=ASF1A PE=1 SV=1	Q9Y294	ASF1A	23 kDa	TRUE	10.7385	6.41856	4.79656	-1	-1	0.000107966	1.30045e-05	116000000	112000000	138000000	5324300	5719400	4899000	2785400	1735000	1274800	6	7	5	2	2	2	2	2	1
54	40S ribosomal protein S9 OS=Homo sapiens OX=9606 GN=RPS9 PE=1 SV=1	A0A024R4M0 (+1)	RPS9	23 kDa	NA	6.49189	6.97261	6.93684	0	0	0.432397	0.4288	10400000	4659900	5001500	10700000	6392000	6782200	7273900	11500000	6277500	8	8	7	7	7	8	6	6	5
55	60S acidic ribosomal protein P2 OS=Homo sapiens OX=9606 GN=RPLP2 PE=1 SV=1	P05387	RPLP2	12 kDa	TRUE	8.47678	8.38608	8.74019	0	0	0.870094	0.58917	18500000	44100000	19800000	21500000	26800000	14900000	26200000	31100000	26700000	6	5	4	5	5	5	5	6	4
56	Chromatin assembly factor 1 subunit A OS=Homo sapiens OX=9606 GN=CHAF1A PE=1 SV=3	Q13111	CHAF1A	107 kDa	NA	6.64669	0.324504	0.320652	-1	-1	4.5073e-08	4.48703e-08	7215900	8041100	5831000	0	0	0	0	0	0	20	19	15	0	0	0	0	0	0
57	Cluster of Poly(rC)-binding protein 1 OS=Homo sapiens OX=9606 GN=PCBP1 PE=1 SV=2 (Q15365)	Q15365 [11]	PCBP1	37 kDa	TRUE	5.20947	5.24679	5.10802	0	0	0.912134	0.754474	3132200	3392900	1593900	2298300	2962800	1990700	2092600	2656500	2077300	10	10	6	6	7	7	6	7	6
58	40S ribosomal protein S12 OS=Homo sapiens OX=9606 GN=RPS12 PE=1 SV=3	P25398	RPS12	15 kDa	NA	7.02599	6.98499	7.33445	0	0	0.870094	0.230973	9133700	10800000	7621500	7897500	8354000	7231200	11000000	13600000	8020100	8	8	5	8	8	6	8	7	5
59	Melanoma-associated antigen D2 OS=Homo sapiens OX=9606 GN=MAGED2 PE=1 SV=2	Q9UNF1	MAGED2	65 kDa	NA	4.83311	5.06693	3.3144	0	0	0.899336	0.39457	2128700	2722400	1317600	1628700	2402000	2361600	2880400	1416300	0	3	6	4	5	7	8	4	4	0
60	60S ribosomal protein L18a OS=Homo sapiens OX=9606 GN=RPL18A PE=1 SV=1	M0R1A7 (+2)	RPL18A	17 kDa	NA	6.83872	7.1203	7.17259	0	0	0.586662	0.463325	6472500	11500000	6834400	8651200	7415000	9695100	8636100	10800000	8992500	7	6	5	6	6	5	5	7	4
61	60S ribosomal protein L8 OS=Homo sapiens OX=9606 GN=RPL8 PE=1 SV=2	P62917	RPL8	28 kDa	NA	8.00076	8.34887	8.15788	0	0	0.606654	0.796341	10300000	30600000	18400000	20000000	19200000	20300000	19800000	18600000	17600000	5	5	4	2	5	4	5	6	4
62	60S ribosomal protein L23a OS=Homo sapiens OX=9606 GN=RPL23A PE=1 SV=1	A8MUS3 (+4)	RPL23A	22 kDa	NA	6.97563	7.36648	7.42525	0	0	0.246507	0.207251	10800000	11900000	5420400	11500000	12200000	7528200	13500000	16000000	6849400	6	7	6	6	7	7	6	6	4
63	Cluster of Actin, cytoplasmic 2 OS=Homo sapiens OX=9606 GN=ACTG1 PE=1 SV=1 (P63261)	P63261 [3]	ACTG1	42 kDa	TRUE	6.20209	6.46117	6.36361	0	0	0.477027	0.640949	6850300	6065400	3272400	5473800	5817900	5108800	5331900	5670200	5156300	3	4	3	9	2	2	3	3	4
64	40S ribosomal protein S8 OS=Homo sapiens OX=9606 GN=RPS8 PE=1 SV=2	P62241	RPS8	24 kDa	NA	7.52991	7.77457	7.60778	0	0	0.404323	0.771906	16700000	15000000	8812200	12200000	15200000	13000000	13600000	17200000	9106900	5	6	5	6	6	5	6	6	5
65	Cluster of Ubiquitin-40S ribosomal protein S27a OS=Homo sapiens OX=9606 GN=RPS27A PE=1 SV=2 (P62979)	P62979 [2]	RPS27A	18 kDa	TRUE	7.93308	8.7248	6.35567	0	0	0.846927	0.663259	33800000	13800000	11000000	28900000	15400000	37000000	55600000	50200000	0	5	6	6	5	5	4	5	5	0
66	Chromatin assembly factor 1 subunit B OS=Homo sapiens OX=9606 GN=CHAF1B PE=1 SV=1	Q13112	CHAF1B	61 kDa	NA	7.03707	0.324504	0.320652	-1	-1	9.72591e-08	9.68479e-08	8744200	10200000	8535500	0	0	0	0	0	0	14	12	14	0	0	0	0	0	0
67	60S ribosomal protein L18 (Fragment) OS=Homo sapiens OX=9606 GN=RPL18 PE=1 SV=1	J3QQ67 (+1)	RPL18	22 kDa	NA	8.22191	8.56352	8.43875	0	0	0.657693	0.771198	26400000	18600000	18700000	29100000	41100000	10600000	35100000	17500000	19000000	5	6	5	5	5	6	5	6	5
68	40S ribosomal protein S5 (Fragment) OS=Homo sapiens OX=9606 GN=RPS5 PE=1 SV=1	M0R0F0 (+1)	RPS5	22 kDa	NA	6.78023	7.40317	7.20955	0	0	0.0607093	0.207251	8441100	7792900	6757400	9467900	13400000	8932900	11900000	12400000	6350800	8	8	7	7	6	6	7	7	6
69	A disintegrin and metalloproteinase with thrombospondin motifs 1 OS=Homo sapiens OX=9606 GN=ADAMTS1 PE=1 SV=4	Q9UHI8	ADAMTS1	105 kDa	NA	4.23355	4.71526	4.75438	0	0	0.514851	0.431454	911430	1764300	1299000	1196700	2640400	1445100	2240100	3006100	873980	4	4	4	5	7	6	9	9	3
70	Far upstream element-binding protein 2 OS=Homo sapiens OX=9606 GN=KHSRP PE=1 SV=1	A0A087WTP3 (+1)	KHSRP	73 kDa	NA	4.41167	4.44251	4.61016	0	0	0.961141	0.710498	2233300	1470600	952310	1446900	1241300	1425900	1220000	1773700	1857500	7	10	4	6	10	7	3	5	6
71	Protein phosphatase 1G OS=Homo sapiens OX=9606 GN=PPM1G PE=1 SV=1	O15355	PPM1G	59 kDa	NA	4.8368	5.52078	5.09384	0	0	0.35242	0.710498	1528100	1978300	2398100	2452500	2784400	3415400	2230000	1591000	3025800	6	6	5	6	9	5	4	5	3
72	60S ribosomal protein L30 (Fragment) OS=Homo sapiens OX=9606 GN=RPL30 PE=1 SV=1	E5RI99 (+1)	RPL30	13 kDa	NA	7.41552	7.86592	7.7723	0	0	0.160362	0.250769	12500000	17700000	7913900	13300000	17900000	12300000	15400000	21900000	9009200	6	6	6	6	6	6	6	6	5
73	40S ribosomal protein S18 OS=Homo sapiens OX=9606 GN=RPS18 PE=1 SV=3	P62269	RPS18	18 kDa	NA	6.99697	7.43228	7.19928	0	0	0.47481	0.717362	13700000	11900000	4541400	11600000	11200000	9220100	11000000	17900000	4805800	6	6	4	5	4	2	4	3	4
74	Cluster of 60S ribosomal protein L10 OS=Homo sapiens OX=9606 GN=RPL10 PE=1 SV=2 (F8W7C6)	F8W7C6	RPL10	19 kDa	TRUE	6.99303	7.82394	7.48438	0	0	0.217976	0.4288	7603700	9031100	9925300	11800000	21900000	10500000	7811900	19600000	10600000	5	6	5	5	4	5	5	5	4
75	Uncharacterized protein OS=Homo sapiens OX=9606 PE=3 SV=2	H3BNC9	H3BNC9	65 kDa	NA	7.54355	7.10066	7.25182	0	0	0.606654	0.710498	16500000	11300000	11800000	6150500	7755700	12400000	10200000	7443300	12600000	5	6	4	7	6	4	6	6	3
76	Lupus La protein OS=Homo sapiens OX=9606 GN=SSB PE=1 SV=2	P05455	SSB	47 kDa	NA	5.20771	5.75965	4.1599	0	0	0.842562	0.640949	2411200	3199000	2130700	4450800	2962400	2922000	4952400	5089000	0	7	7	5	4	9	5	8	13	0
77	60S ribosomal protein L13 OS=Homo sapiens OX=9606 GN=RPL13 PE=1 SV=4	P26373	RPL13	24 kDa	NA	7.54533	7.81087	7.89601	0	0	0.606654	0.448981	16200000	22000000	6627800	13000000	13400000	14800000	20600000	15200000	12200000	6	6	6	6	6	6	6	5	6
78	Reticulocalbin-2 OS=Homo sapiens OX=9606 GN=RCN2 PE=1 SV=1	Q14257 (+1)	RCN2	37 kDa	NA	5.28515	6.10311	3.72355	0	0	0.68456	0.411961	2842500	3867300	1800000	4247300	4668300	3938900	2574300	3856300	0	5	8	7	8	8	7	4	5	0
79	60 kDa heat shock protein, mitochondrial OS=Homo sapiens OX=9606 GN=HSPD1 PE=1 SV=2	P10809	HSPD1	61 kDa	NA	5.2636	5.54482	5.43786	0	0	0.358772	0.547676	2840000	2741700	2349900	3261800	2669500	2835100	2931500	3126700	2505100	7	10	7	9	7	3	4	3	4
80	Fatty acid synthase OS=Homo sapiens OX=9606 GN=FASN PE=1 SV=1	A0A0U1RQF0 (+1)	FASN	273 kDa	TRUE	3.5822	4.5277	1.7505	0	0	0.719509	0.448981	2646900	3067600	0	1641700	1018900	1801100	0	1815300	1.5767	7	8	0	6	2	2	0	2	2
81	Crk-like protein OS=Homo sapiens OX=9606 GN=CRKL PE=1 SV=1	P46109	CRKL	34 kDa	NA	6.32084	6.4371	6.54097	0	0	0.786505	0.573876	7373000	6208400	3786700	4868500	6658900	4800000	9068000	7224800	3593200	3	3	4	4	4	2	3	3	3
82	40S ribosomal protein S11 OS=Homo sapiens OX=9606 GN=RPS11 PE=1 SV=3	P62280	RPS11	18 kDa	NA	6.39826	6.27405	6.26568	0	0	0.777836	0.735776	6657000	5251100	5633100	4509500	6053700	4088500	5276100	5012200	4805200	5	6	5	8	7	5	6	6	5
83	Leucine-rich repeat-containing protein 59 OS=Homo sapiens OX=9606 GN=LRRC59 PE=1 SV=1	Q96AG4	LRRC59	35 kDa	NA	7.45881	2.38369	6.88155	0	0	0.0507657	0.796341	15300000	16600000	7579600	0	6301200	0	9267500	9281100	5468500	9	9	6	0	2	0	7	7	3
84	60S ribosomal protein L13a OS=Homo sapiens OX=9606 GN=RPL13A PE=1 SV=2	P40429	RPL13A	24 kDa	NA	7.61066	7.92384	7.90576	0	0	0.35242	0.39457	13700000	20000000	9584700	15400000	20000000	10800000	18400000	23500000	9314400	4	5	4	5	5	5	5	5	6
85	Transcription intermediary factor 1-beta OS=Homo sapiens OX=9606 GN=TRIM28 PE=1 SV=5	Q13263 (+1)	TRIM28	89 kDa	NA	3.10882	4.18608	4.04209	0	0	0.543844	0.571986	0	1591200	1422700	1371200	1206400	927120	957320	1592900	842740	0	6	3	4	5	4	4	5	4
86	Cluster of 60S ribosomal protein L28 OS=Homo sapiens OX=9606 GN=RPL28 PE=1 SV=3 (P46779)	P46779	RPL28	16 kDa	TRUE	5.52332	6.63343	6.37069	1	1	0.0048502	0.02581	2679600	4024000	2936000	6493200	7633300	4727900	6434200	5965500	4200000	4	4	5	3	2	4	3	5	3
87	40S ribosomal protein S13 OS=Homo sapiens OX=9606 GN=RPS13 PE=1 SV=2	P62277	RPS13	17 kDa	NA	8.11303	8.60753	7.3165	0	0	0.278503	0.14089	22900000	30000000	11200000	25400000	27100000	19500000	10900000	9302200	11000000	3	3	3	3	3	3	4	4	3
88	60S ribosomal protein L11 OS=Homo sapiens OX=9606 GN=RPL11 PE=1 SV=2	P62913	RPL11	20 kDa	NA	7.8297	8.10535	8.07352	0	0	0.48882	0.508711	16000000	18400000	13800000	22200000	20400000	10700000	17500000	23200000	13700000	5	6	5	4	4	3	5	5	5
89	Insulin-like growth factor 2 mRNA-binding protein 1 OS=Homo sapiens OX=9606 GN=IGF2BP1 PE=1 SV=2	Q9NZI8	IGF2BP1	63 kDa	TRUE	5.35384	5.47713	5.40289	0	0	0.846927	0.94027	2101200	2799500	3638200	3479800	2726800	2283500	4008600	2681800	2013800	5	7	2	2	5	4	2	4	3
90	Cluster of Heat shock protein HSP 90-beta OS=Homo sapiens OX=9606 GN=HSP90AB1 PE=1 SV=4 (P08238)	P08238 [3]	HSP90AB1	83 kDa	TRUE	4.87193	4.6156	4.71086	0	0	0.637128	0.754474	1989000	1888500	2102000	1666600	2067000	1086500	1446400	1606800	2113600	5	4	4	5	5	2	2	3	5
91	40S ribosomal protein S15a OS=Homo sapiens OX=9606 GN=RPS15A PE=1 SV=2	P62244	RPS15A	15 kDa	NA	6.33637	6.93525	6.97317	0	0	0.242007	0.224377	4153800	8717500	4886400	5328700	10500000	7706600	9498000	10300000	5821400	4	3	3	4	3	2	4	5	3
92	40S ribosomal protein S16 OS=Homo sapiens OX=9606 GN=RPS16 PE=1 SV=2	P62249	RPS16	16 kDa	NA	7.16132	7.50921	7.73689	0	0	0.32939	0.160419	13300000	9203700	8129700	10400000	13600000	9936000	15700000	16100000	10900000	4	5	3	3	4	3	4	4	2
93	40S ribosomal protein S23 OS=Homo sapiens OX=9606 GN=RPS23 PE=1 SV=3	P62266	RPS23	16 kDa	NA	6.98674	7.63755	6.88935	0	0	0.390105	0.894529	10900000	6033300	10100000	13300000	12100000	11300000	5005300	10700000	8616100	3	6	3	4	4	3	5	4	2
94	60S ribosomal protein L31 OS=Homo sapiens OX=9606 GN=RPL31 PE=1 SV=1	P62899	RPL31	14 kDa	NA	7.77952	7.91764	7.90984	0	0	0.589212	0.573876	16600000	18200000	12200000	14300000	17200000	13200000	18600000	19500000	11000000	4	5	3	4	5	3	4	5	4
95	Cluster of 40S ribosomal protein S10 OS=Homo sapiens OX=9606 GN=RPS10 PE=1 SV=1 (P46783)	P46783	RPS10	19 kDa	TRUE	5.17134	8.22325	7.44349	0	0	0.305781	0.406989	24600000	10300000	0	19000000	19600000	16300000	14200000	14800000	7268600	3	5	0	3	3	2	4	4	2
96	60S ribosomal protein L17 (Fragment) OS=Homo sapiens OX=9606 GN=RPL17 PE=1 SV=1	A0A087WXM6 (+5)	RPL17	20 kDa	NA	7.81132	8.22503	7.39131	0	0	0.460283	0.406989	21900000	12300000	14300000	20000000	21300000	14400000	8760600	15200000	10000000	3	5	3	3	4	3	5	5	4
97	Heterogeneous nuclear ribonucleoprotein A1 OS=Homo sapiens OX=9606 GN=HNRNPA1 PE=1 SV=2	F8W6I7 (+3)	HNRNPA1	33 kDa	TRUE	3.93596	4.58487	4.38786	0	0	0.160362	0.312332	860260	1679200	795510	1306800	2049700	1301100	1180100	1782800	1234400	4	5	5	6	7	5	6	6	4
98	Cluster of Isoform 2 of Protein SET OS=Homo sapiens OX=9606 GN=SET (Q01105-2)	Q01105-2	SET	32 kDa	TRUE	6.3812	6.70948	7.33687	0	0	0.573375	0.1523	5092400	6906100	5453000	5771800	7789300	6039600	8649400	10500000	12700000	3	4	4	5	5	4	5	6	5
100	40S ribosomal protein S19 OS=Homo sapiens OX=9606 GN=RPS19 PE=1 SV=2	P39019	RPS19	16 kDa	NA	6.76275	6.89228	6.51809	0	0	0.652816	0.39457	9882700	8763000	5081900	8228300	8732900	5547400	7119800	7431200	4186300	5	6	5	5	6	5	6	6	5
101	40S ribosomal protein S15 OS=Homo sapiens OX=9606 GN=RPS15 PE=1 SV=1	A0A0B4J2B4 (+4)	RPS15	14 kDa	NA	6.63276	7.03566	6.88864	0	0	0.181517	0.39457	7465800	9192000	4876300	8047400	9233000	7147800	9729600	10700000	4663200	4	4	3	4	4	3	4	4	3
102	DnaJ homolog subfamily C member 9 OS=Homo sapiens OX=9606 GN=DNAJC9 PE=1 SV=1	Q8WXX5	DNAJC9	30 kDa	NA	8.40608	1.86724	0.320652	-1	-1	0.00468532	0.00156354	20700000	32700000	20300000	0	2119700	0	0	0	0	8	10	10	0	2	0	0	0	0
103	60S ribosomal protein L24 OS=Homo sapiens OX=9606 GN=RPL24 PE=1 SV=1	C9JNW5 (+2)	RPL24	18 kDa	NA	6.82063	8.60265	7.43732	1	0	0.000392468	0.124509	7410700	11400000	5867200	22300000	25700000	23000000	12900000	16300000	7191500	5	5	5	5	4	5	5	5	5
104	Importin subunit beta-1 OS=Homo sapiens OX=9606 GN=KPNB1 PE=1 SV=2	Q14974	KPNB1	97 kDa	NA	5.01107	4.78001	5.15769	0	0	0.606654	0.729585	2461800	3002100	1500500	1458100	1958600	1800600	1747600	3190500	2291000	5	6	4	3	5	2	4	4	3
105	U2 small nuclear ribonucleoprotein A' OS=Homo sapiens OX=9606 GN=SNRPA1 PE=1 SV=2	P09661	SNRPA1	28 kDa	NA	5.6549	5.7189	5.74844	0	0	0.899336	0.847385	2787800	4515500	3310900	3323400	2666400	3937900	4959200	3156400	2808300	2	3	3	6	5	7	3	4	7
106	60S ribosomal protein L27 OS=Homo sapiens OX=9606 GN=RPL27 PE=1 SV=2	P61353	RPL27	16 kDa	NA	7.70593	8.08401	7.97611	0	0	0.327346	0.447907	13400000	20800000	11400000	14500000	22800000	13900000	19700000	25300000	9389800	4	4	4	4	4	4	4	4	4
107	40S ribosomal protein S25 OS=Homo sapiens OX=9606 GN=RPS25 PE=1 SV=1	P62851	RPS25	14 kDa	NA	7.03247	7.38619	7.65629	0	0	0.372476	0.178213	13500000	11200000	5213500	10500000	13800000	7607400	12700000	17500000	10500000	4	4	3	4	4	3	4	4	4
108	60S ribosomal protein L14 OS=Homo sapiens OX=9606 GN=RPL14 PE=1 SV=1	E7EPB3 (+1)	RPL14	15 kDa	NA	6.86557	7.8468	7.77259	0	0	0.173154	0.215055	8474000	12100000	5372100	27300000	12900000	8084200	11700000	15900000	15500000	5	4	5	4	4	5	4	5	3
109	60S ribosomal protein L27a OS=Homo sapiens OX=9606 GN=RPL27A PE=1 SV=1	E9PLL6 (+1)	RPL27A	12 kDa	NA	7.88261	8.05068	8.34803	0	0	0.639466	0.215055	17300000	22300000	12000000	19900000	13800000	15400000	22100000	32100000	14100000	3	4	3	3	4	3	4	4	3
110	Ribosomal protein L19 OS=Homo sapiens OX=9606 GN=RPL19 PE=1 SV=1	J3KTE4 (+2)	RPL19	23 kDa	NA	7.21155	7.70182	7.69749	0	0	0.160394	0.204157	12200000	9589000	9370000	13900000	13900000	10800000	14800000	16900000	10200000	4	5	4	4	4	4	4	4	4
111	Heat shock 70 kDa protein 4 OS=Homo sapiens OX=9606 GN=HSPA4 PE=1 SV=4	P34932	HSPA4	94 kDa	NA	3.65925	3.61752	4.55003	0	0	0.961141	0.215019	1131000	775010	715810	630620	1063900	711410	1088300	1332900	2374200	3	3	4	2	5	2	5	4	7
112	40S ribosomal protein S7 OS=Homo sapiens OX=9606 GN=RPS7 PE=1 SV=1	P62081	RPS7	22 kDa	NA	7.55462	7.76779	6.87374	0	0	0.639466	0.19423	12900000	13500000	12900000	13700000	15900000	11000000	6037400	10300000	7276900	2	4	3	5	5	4	4	6	3
113	60S ribosomal protein L32 (Fragment) OS=Homo sapiens OX=9606 GN=RPL32 PE=1 SV=1	D3YTB1 (+2)	RPL32	16 kDa	NA	6.34123	6.19256	6.46565	0	0	0.870094	0.885916	5991400	9135200	3376000	7285700	6554800	2036900	7791400	11000000	2441000	4	5	3	6	5	3	5	5	3
114	DnaJ homolog subfamily A member 1 OS=Homo sapiens OX=9606 GN=DNAJA1 PE=1 SV=2	P31689	DNAJA1	45 kDa	NA	3.33383	5.2828	1.48359	0	0	0.299291	0.314884	1925600	1135700	163660	2574400	2504700	2245900	964900	0	0	4	4	2	8	7	6	2	0	0
115	Cluster of 40S ribosomal protein S6 OS=Homo sapiens OX=9606 GN=RPS6 PE=1 SV=1 (P62753)	P62753	RPS6	29 kDa	TRUE	7.32211	7.74164	7.42588	0	0	0.160362	0.710498	10600000	14900000	8938200	11400000	16400000	12100000	12400000	13800000	8475200	3	4	4	4	4	4	3	4	4
116	Cluster of 60S ribosomal protein L37a OS=Homo sapiens OX=9606 GN=RPL37A PE=1 SV=1 (C9J4Z3)	C9J4Z3 [2]	RPL37A	8 kDa	TRUE	5.40042	5.89068	6.1055	0	0	0.411407	0.23381	2486500	5142100	1980500	4221000	5368700	2279200	4604300	7760000	2685100	3	5	2	4	5	4	4	4	3
117	60S acidic ribosomal protein P1 OS=Homo sapiens OX=9606 GN=RPLP1 PE=1 SV=1	P05386	RPLP1	12 kDa	TRUE	9.87868	10.0541	10.0178	0	0	0.785396	0.796341	61300000	102000000	49400000	87700000	48100000	61100000	59900000	140000000	39000000	1	1	1	1	2	1	2	1	1
119	Sequestosome-1 OS=Homo sapiens OX=9606 GN=SQSTM1 PE=1 SV=1	Q13501	SQSTM1	48 kDa	NA	4.49135	3.67121	4.85323	0	0	0.245739	0.58917	1147200	2013800	1553300	565650	646320	1403800	1700900	2144200	1853600	4	5	6	2	2	2	6	6	2
120	Cluster of Zinc finger CCCH-type antiviral protein 1 OS=Homo sapiens OX=9606 GN=ZC3HAV1 PE=1 SV=3 (Q7Z2W4)	Q7Z2W4	ZC3HAV1	101 kDa	TRUE	2.77363	3.89363	3.01876	0	0	0.606654	0.911843	1047500	1338500	0	925750	1080600	839010	1206900	1814700	0	5	5	0	4	4	4	4	6	0
121	Bifunctional glutamate/proline--tRNA ligase OS=Homo sapiens OX=9606 GN=EPRS PE=1 SV=5	P07814	EPRS	171 kDa	TRUE	4.08089	4.03472	3.86932	0	0	0.899336	0.547676	1242600	1032600	1167300	1050500	1105600	962360	796300	1129900	971020	2	5	3	3	5	3	2	7	4
122	Cluster of 60S ribosomal protein L36a OS=Homo sapiens OX=9606 GN=RPL36A PE=1 SV=1 (J3KQN4)	J3KQN4 [3]	RPL36A	16 kDa	TRUE	4.65529	3.55307	3.37592	0	0	0.681532	0.623274	1765000	2484800	1196000	2441600	0	1907600	1831600	2570100	0	3	3	3	3	0	3	3	3	0
123	Cluster of Cysteine and glycine-rich protein 2 OS=Homo sapiens OX=9606 GN=CSRP2 PE=1 SV=3 (Q16527)	Q16527	CSRP2	21 kDa	TRUE	5.0817	5.23263	5.17452	0	0	0.719509	0.803967	3040500	2920500	1455800	2869500	2130600	2133200	3076600	2137200	2018000	5	5	3	3	4	4	2	3	4
124	Peptidyl-prolyl cis-trans isomerase A OS=Homo sapiens OX=9606 GN=PPIA PE=1 SV=2	P62937	PPIA	18 kDa	NA	3.86653	6.15086	4.0922	0	0	0.477027	0.941327	3498600	4309500	0	6211800	4836700	2908400	3496600	6271100	0	4	4	0	3	3	2	2	4	0
125	Cluster of BolA-like protein 2 OS=Homo sapiens OX=9606 GN=BOLA2 PE=1 SV=1 (Q9H3K6)	Q9H3K6	BOLA2	10 kDa	TRUE	6.13932	6.37658	6.76349	0	0	0.68456	0.292748	6996700	6957400	2506900	5985100	7555000	3100800	7301300	6926600	7041800	4	3	3	4	4	3	3	4	2
126	Cluster of Cofilin-1 OS=Homo sapiens OX=9606 GN=CFL1 PE=1 SV=3 (P23528)	P23528	CFL1	19 kDa	TRUE	5.94506	6.28032	6.36744	0	0	0.477027	0.372579	4062700	7246100	2717100	5447700	5529700	3760200	4240300	7288100	5116100	2	5	2	4	3	4	4	3	3
127	40S ribosomal protein SA OS=Homo sapiens OX=9606 GN=RPSA PE=1 SV=1	A0A0C4DG17 (+2)	RPSA	33 kDa	NA	5.93286	5.97548	4.05707	0	0	0.982027	0.39457	3175000	5357000	4363800	3554700	5766500	2973300	3804100	5331800	0	4	4	2	2	4	3	4	5	0
128	40S ribosomal protein S14 (Fragment) OS=Homo sapiens OX=9606 GN=RPS14 PE=1 SV=1	A0A2R8Y811 (+1)	RPS14	16 kDa	NA	6.91474	7.20051	6.96649	0	0	0.318397	0.845533	10400000	10700000	5473600	9712300	10300000	7468200	10600000	9718700	5472400	5	4	4	4	4	5	4	4	3
130	Protein RCC2 OS=Homo sapiens OX=9606 GN=RCC2 PE=1 SV=2	Q9P258	RCC2	56 kDa	NA	5.38227	5.73931	3.62115	0	0	0.870094	0.39457	3214500	4844000	1591200	2517500	6147700	2439500	3047600	2599500	0	3	5	2	3	2	2	2	5	0
131	40S ribosomal protein S24 OS=Homo sapiens OX=9606 GN=RPS24 PE=1 SV=1	A0A2R8Y849 (+6)	RPS24	15 kDa	NA	4.81441	7.24587	7.04261	0	0	0.372476	0.39457	0	9575300	8274400	7903700	12100000	8557700	9719800	14000000	4949100	0	3	2	3	3	3	3	3	2
132	Protein LTV1 homolog OS=Homo sapiens OX=9606 GN=LTV1 PE=1 SV=1	Q96GA3	LTV1	55 kDa	NA	1.48724	4.87679	3.45676	0	0	0.168921	0.39457	0	1079500	0	1222300	2374600	2155900	3723500	1483400	0	0	2	0	5	5	6	2	4	0
133	Cluster of Profilin OS=Homo sapiens OX=9606 GN=PFN2 PE=1 SV=1 (C9J0J7)	C9J0J7 [3]	PFN2	10 kDa	TRUE	6.91522	7.28783	7.23046	0	0	0.639466	0.703794	7067300	9341400	8832900	15200000	5515300	10400000	14600000	14600000	4728900	4	3	2	3	2	2	2	4	3
134	60S ribosomal protein L38 OS=Homo sapiens OX=9606 GN=RPL38 PE=1 SV=2	P63173	RPL38	8 kDa	NA	3.93591	6.52971	0.320652	0	0	0.242007	0.160419	5156600	3370700	0	4652700	6125400	6517200	0	0	0	2	3	0	3	3	2	0	0	0
135	Acidic leucine-rich nuclear phosphoprotein 32 family member B OS=Homo sapiens OX=9606 GN=ANP32B PE=1 SV=1	Q92688 (+1)	ANP32B	29 kDa	TRUE	6.08413	2.02877	6.43243	0	0	0.0595241	0.855627	4961200	4259300	4790300	2779000	0	0	6496100	5481700	5069700	2	3	4	1	0	0	1	2	3
136	40S ribosomal protein S20 OS=Homo sapiens OX=9606 GN=RPS20 PE=1 SV=1	P60866	RPS20	13 kDa	NA	7.84943	7.91224	8.37992	0	0	0.870094	0.207251	23700000	21100000	8837400	17500000	16800000	11000000	26800000	29400000	13600000	2	2	2	2	2	2	2	2	2
137	Programmed cell death protein 6 OS=Homo sapiens OX=9606 GN=PDCD6 PE=1 SV=1	O75340 (+1)	PDCD6	22 kDa	NA	5.41145	5.3027	5.1326	0	0	0.756424	0.39457	3492300	3797500	1942500	2450200	2787300	2215500	1909300	2997800	2126700	3	3	2	4	4	3	4	4	3
138	Heterogeneous nuclear ribonucleoprotein U OS=Homo sapiens OX=9606 GN=HNRNPU PE=1 SV=6	Q00839	HNRNPU	91 kDa	NA	2.10652	3.88414	4.77679	0	0	0.606654	0.39457	0	0	2808800	0	3658200	2680100	465050	4408500	2752700	0	0	2	0	2	2	2	2	3
139	DnaJ homolog subfamily A member 2 OS=Homo sapiens OX=9606 GN=DNAJA2 PE=1 SV=1	O60884	DNAJA2	46 kDa	NA	3.00132	4.74103	0.320652	0	0	0.299291	0.160419	1284600	1792600	0	1211500	2037200	1918400	0	0	0	2	3	0	2	5	3	0	0	0
140	40S ribosomal protein S26 OS=Homo sapiens OX=9606 GN=RPS26 PE=1 SV=3	P62854	RPS26	13 kDa	NA	7.42678	7.67383	4.97693	0	0	0.932876	0.39457	16600000	16800000	6529600	14800000	14000000	9555100	0	15800000	6383500	3	2	2	2	3	2	0	2	2
141	Bystin OS=Homo sapiens OX=9606 GN=BYSL PE=1 SV=3	Q13895	BYSL	50 kDa	NA	4.34312	5.08015	3.22493	0	0	0.681886	0.511086	1962800	1121300	1194500	1554700	3212700	1928300	2179400	1551200	0	2	2	3	2	4	5	2	4	0
143	60S ribosomal protein L36 OS=Homo sapiens OX=9606 GN=RPL36 PE=1 SV=3	Q9Y3U8	RPL36	12 kDa	NA	7.51693	7.04595	4.81843	0	0	0.870094	0.324591	13100000	18500000	8900900	9511400	7489400	7566700	6583000	0	9467500	2	2	3	3	3	3	4	0	2
144	Coiled-coil-helix-coiled-coil-helix domain-containing protein 2 OS=Homo sapiens OX=9606 GN=CHCHD2 PE=1 SV=1	Q9Y6H1	CHCHD2	16 kDa	NA	4.65593	3.92419	8.21157	0	0	0.846927	0.292748	8144800	10300000	0	3159600	0	3111100	34900000	26100000	8541400	3	3	0	2	0	3	2	3	3
145	Cytochrome c oxidase copper chaperone OS=Homo sapiens OX=9606 GN=COX17 PE=1 SV=1	C9J8T6 (+1)	COX17	11 kDa	NA	6.52655	7.11816	6.38856	0	0	0.140476	0.710498	7545300	8426000	4232600	8577200	10700000	6893800	5947000	9084200	3200300	2	2	2	2	2	2	2	2	2
146	60S ribosomal protein L22 OS=Homo sapiens OX=9606 GN=RPL22 PE=1 SV=2	P35268	RPL22	15 kDa	NA	7.58447	7.90853	7.85866	0	0	0.199023	0.275945	13900000	16800000	10500000	13500000	18800000	12600000	16700000	20300000	10600000	3	3	3	3	3	2	3	3	3
147	Cluster of Acidic leucine-rich nuclear phosphoprotein 32 family member A OS=Homo sapiens OX=9606 GN=ANP32A PE=1 SV=1 (P39687)	P39687	ANP32A	29 kDa	TRUE	5.44218	0.324504	3.76292	-1	0	0.0223291	0.395675	3363300	2665000	2935300	0	0	0	3032400	3552800	0	3	2	1	0	0	0	1	1	0
150	26S proteasome non-ATPase regulatory subunit 11 OS=Homo sapiens OX=9606 GN=PSMD11 PE=1 SV=3	O00231 (+1)	PSMD11	47 kDa	NA	4.92168	0.324504	2.73086	-1	0	0.00948242	0.204157	1874700	1859700	2483000	0	0	0	785440	1507900	0	5	5	4	0	0	0	3	2	0
151	Cluster of Histone H2B type 1-K OS=Homo sapiens OX=9606 GN=HIST1H2BK PE=1 SV=3 (O60814)	O60814 [15]	HIST1H2BK	14 kDa	TRUE	2.3033	4.77529	6.6031	0	0	0.504985	0.231136	5797300	0	0	7469900	9798700	0	7704500	11400000	3124500	2	0	0	2	2	0	3	3	2
156	26S proteasome regulatory subunit 7 OS=Homo sapiens OX=9606 GN=PSMC2 PE=1 SV=3	P35998	PSMC2	49 kDa	NA	4.5913	0.324504	3.11338	-1	0	0.0203654	0.39457	1625000	1566500	1719900	0	0	0	1420600	1886000	0	4	4	4	0	0	0	3	2	0
157	26S proteasome non-ATPase regulatory subunit 1 OS=Homo sapiens OX=9606 GN=PSMD1 PE=1 SV=2	Q99460 (+1)	PSMD1	106 kDa	NA	3.80908	0.324504	1.08773	-1	-1	0.00447858	0.0204523	1097600	1394000	584500	0	0	0	0	431550	0	6	5	2	0	0	0	0	2	0
158	60S ribosomal protein L35 OS=Homo sapiens OX=9606 GN=RPL35 PE=1 SV=2	P42766	RPL35	15 kDa	NA	7.89298	7.84161	7.98261	0	0	0.870094	0.73793	18500000	23000000	11200000	16100000	16900000	10300000	15600000	23100000	12800000	2	2	2	2	2	2	2	2	2
159	Uncharacterized protein C7orf50 (Fragment) OS=Homo sapiens OX=9606 GN=C7orf50 PE=1 SV=1	C9JQV0 (+1)	C7orf50	22 kDa	NA	4.55505	2.00732	1.75771	0	0	0.34215	0.290838	1881700	1758500	1261000	0	2848500	0	0	1843900	0	2	4	3	0	5	0	0	3	0
161	Cluster of 26S proteasome non-ATPase regulatory subunit 2 OS=Homo sapiens OX=9606 GN=PSMD2 PE=1 SV=3 (Q13200)	Q13200	PSMD2	100 kDa	TRUE	4.25515	0.324504	3.71618	-1	0	3.6494e-06	0.179405	1733100	1281600	998810	0	0	0	1134000	908750	632440	4	3	3	0	0	0	3	2	2
162	26S proteasome non-ATPase regulatory subunit 3 OS=Homo sapiens OX=9606 GN=PSMD3 PE=1 SV=2	O43242	PSMD3	61 kDa	NA	4.4135	0.324504	1.77338	-1	0	0.0297365	0.190564	1291500	1486500	1567700	0	0	0	0	1907600	0	4	4	2	0	0	0	0	2	0
165	Heterogeneous nuclear ribonucleoprotein Q OS=Homo sapiens OX=9606 GN=SYNCRIP PE=1 SV=2	O60506 (+1)	SYNCRIP	70 kDa	TRUE	3.76626	4.60868	2.74963	0	0	0.606654	0.50857	860170	1511500	625250	2906400	1357100	933800	882750	0	1055900	2	3	2	2	3	2	2	0	2
167	Calnexin OS=Homo sapiens OX=9606 GN=CANX PE=1 SV=2	P27824 (+2)	CANX	68 kDa	NA	3.702	1.15701	1.41353	0	0	0.140476	0.207251	933900	947220	776180	0	0	426940	0	0	693360	3	4	4	0	0	2	0	0	5
169	Elongation factor 2 OS=Homo sapiens OX=9606 GN=EEF2 PE=1 SV=4	P13639	EEF2	95 kDa	NA	0.31669	3.72311	2.52515	1	0	0.0200798	0.160419	0	0	0	979680	967570	628570	922210	819410	0	0	0	0	2	4	3	2	2	0
173	Cluster of Chromobox protein homolog 1 OS=Homo sapiens OX=9606 GN=CBX1 PE=1 SV=1 (P83916)	P83916	CBX1	21 kDa	TRUE	0.31669	0.324504	5.16854	0	1	0.980111	6.16751e-07	0	0	0	0	0	0	3190000	2106200	1954700	0	0	0	0	0	0	3	3	3
178	Cluster of 26S proteasome regulatory subunit 8 OS=Homo sapiens OX=9606 GN=PSMC5 PE=1 SV=1 (P62195)	P62195	PSMC5	46 kDa	TRUE	3.68167	0.324504	1.35136	-1	0	0.0181188	0.133019	690350	968300	965680	0	0	0	0	764200	0	5	2	3	0	0	0	0	2	0
179	Cluster of Heterogeneous nuclear ribonucleoprotein D0 (Fragment) OS=Homo sapiens OX=9606 GN=HNRNPD PE=1 SV=8 (H0Y8G5)	H0Y8G5 [6]	HNRNPD	30 kDa	TRUE	1.73828	5.3581	1.93866	0	0	0.168921	0.94027	0.92296	1877100	0	2108900	3285900	2446100	0	2729500	0	2	2	0	2	3	2	0	2	0
180	Cluster of Probable serine carboxypeptidase CPVL OS=Homo sapiens OX=9606 GN=CPVL PE=1 SV=2 (Q9H3G5)	Q9H3G5	CPVL	54 kDa	TRUE	1.34151	4.7941	0.320652	1	0	0.0163698	0.397061	0	782980	0	1315100	1845800	2161700	0	0	0	0	4	0	3	4	5	0	0	0
181	Cluster of Death domain-associated protein 6 OS=Homo sapiens OX=9606 GN=DAXX PE=1 SV=2 (Q9UER7)	Q9UER7 [2]	DAXX	81 kDa	TRUE	5.83015	0.324504	0.320652	-1	-1	4.07555e-07	4.05462e-07	4891200	3486700	3516100	0	0	0	0	0	0	2	6	3	0	0	0	0	0	0
184	Poly [ADP-ribose] polymerase 1 OS=Homo sapiens OX=9606 GN=PARP1 PE=1 SV=4	P09874	PARP1	113 kDa	NA	3.33782	3.37831	2.33181	0	0	0.980111	0.39457	640080	760210	652020	765750	731360	522630	633170	791300	0	2	2	2	2	2	2	2	2	0
185	Chromobox protein homolog 5 OS=Homo sapiens OX=9606 GN=CBX5 PE=1 SV=1	P45973	CBX5	22 kDa	NA	0.31669	2.12971	5.17178	0	0	0.432397	0.0728903	0	0.92638	0	0	0	2942000	1118700	4468400	2621600	0	2	0	0	0	2	3	4	3
187	Heat shock protein 105 kDa OS=Homo sapiens OX=9606 GN=HSPH1 PE=1 SV=1	Q92598 (+1)	HSPH1	97 kDa	TRUE	0.31669	0.324504	2.6481	0	0	0.993041	0.160419	0	0	0	0	0	0	1.1285	994720	814310	0	0	0	0	0	0	2	4	3
189	Proteasome activator complex subunit 3 OS=Homo sapiens OX=9606 GN=PSME3 PE=1 SV=1	A0A087WTV2 (+4)	PSME3	20 kDa	NA	4.93331	3.29874	1.72123	0	0	0.524253	0.213458	1620100	2380500	2329300	0	1969500	1501800	0	1703700	0	2	4	3	0	2	2	0	2	0
191	Proteasome subunit beta type-5 OS=Homo sapiens OX=9606 GN=PSMB5 PE=1 SV=3	P28074	PSMB5	28 kDa	NA	4.05544	0.324504	1.49434	-1	0	0.0188834	0.14089	1246200	995330	1144200	0	0	0	987160	0	0	2	3	2	0	0	0	2	0	0
203	Histone H1x OS=Homo sapiens OX=9606 GN=H1FX PE=1 SV=1	Q92522	H1FX	22 kDa	NA	5.16508	3.75371	3.96113	0	0	0.637128	0.68959	3342500	2735200	1668300	2920900	2959000	0	4188700	3924900	0	2	2	2	2	2	0	2	2	0
204	Prostaglandin E synthase 2 OS=Homo sapiens OX=9606 GN=PTGES2 PE=1 SV=1	Q9H7Z7	PTGES2	42 kDa	NA	5.15291	0.324504	0.320652	-1	-1	3.6494e-06	3.62828e-06	1722400	3057600	2714500	0	0	0	0	0	0	2	4	5	0	0	0	0	0	0
209	Signal recognition particle 14 kDa protein OS=Homo sapiens OX=9606 GN=SRP14 PE=1 SV=1	H0YLA2 (+1)	SRP14	13 kDa	NA	0.31669	4.4249	2.93696	1	0	0.0193244	0.160419	0	0	0	1314900	1467100	1289700	1146100	0	1197300	0	0	0	2	2	2	2	0	2
211	Acyl carrier protein, mitochondrial OS=Homo sapiens OX=9606 GN=NDUFAB1 PE=1 SV=3	O14561	NDUFAB1	17 kDa	NA	2.38297	7.37133	0.320652	0	0	0.0552623	0.39457	0	7771600	0	7429600	17600000	8188100	0	0	0	0	2	0	3	3	2	0	0	0
221	26S proteasome non-ATPase regulatory subunit 4 OS=Homo sapiens OX=9606 GN=PSMD4 PE=1 SV=1	P55036	PSMD4	41 kDa	NA	4.83604	0.324504	0.320652	-1	-1	6.20627e-07	6.16751e-07	2708400	2073400	1355100	0	0	0	0	0	0	2	3	3	0	0	0	0	0	0
222	26S proteasome non-ATPase regulatory subunit 13 OS=Homo sapiens OX=9606 GN=PSMD13 PE=1 SV=2	Q9UNM6 (+1)	PSMD13	43 kDa	NA	4.14131	0.324504	0.320652	-1	-1	5.54055e-06	5.50014e-06	1392200	960100	1264400	0	0	0	0	0	0	3	3	2	0	0	0	0	0	0
234	Cluster of Metastasis-associated protein MTA1 OS=Homo sapiens OX=9606 GN=MTA1 PE=1 SV=1 (E7ESY4)	E7ESY4 [4]	MTA1	79 kDa	TRUE	0.31669	0.324504	4.14566	0	1	0.980111	1.72404e-06	0	0	0	0	0	0	1046800	1185200	1240800	0	0	0	0	0	0	2	3	3
237	26S proteasome regulatory subunit 10B OS=Homo sapiens OX=9606 GN=PSMC6 PE=1 SV=1	A0A087X2I1 (+1)	PSMC6	46 kDa	NA	4.88723	0.324504	0.320652	-1	-1	2.82355e-05	2.59067e-05	1372400	2046400	2837600	0	0	0	0	0	0	4	3	2	0	0	0	0	0	0
238	Transmembrane protein 106B OS=Homo sapiens OX=9606 GN=TMEM106B PE=1 SV=2	Q9NUM4	TMEM106B	31 kDa	NA	5.70262	0.324504	0.320652	-1	-1	6.20627e-07	6.16751e-07	3364700	3490500	3853700	0	0	0	0	0	0	2	5	4	0	0	0	0	0	0
256	ATP synthase subunit gamma, mitochondrial OS=Homo sapiens OX=9606 GN=ATP5F1C PE=1 SV=1	P36542	ATP5F1C	33 kDa	NA	0.31669	4.66544	0.320652	1	0	4.11375e-07	0.991686	0	0	0	1972900	1529900	1354000	0	0	0	0	0	0	2	2	2	0	0	0
263	Cytochrome c oxidase subunit NDUFA4 OS=Homo sapiens OX=9606 GN=NDUFA4 PE=1 SV=1	O00483	NDUFA4	9 kDa	NA	0.31669	4.73702	0.320652	1	0	0.000681966	0.994507	0	0	0	2874200	3061500	566410	0	0	0	0	0	0	2	2	2	0	0	0
