# Supplementary material for: A specific role for importin-5 and NASP in the import and nuclear hand-off of monomeric H3
Source: eLife. 2022 Sep 6;11:e81755. doi: 10.7554/eLife.81755 (PMC9560165; doi:10.7554/eLife.81755)
Supplement: Figure 2—source data 2. — Limma linear model coefficients of normalised total precursor intensity used in Figure 2C, D and F. [file elife-81755-fig2-data2.xlsx]

## Sheet: MS_H4_Co_IP
Table S4. MS data for H4_EGFP CoIP						Linear model coeff log 2(Normalised total precursor intensity)			linear model fit to determine significant changes (correcred p-val < 0.05). 1 Increase compared to control, -1 decreased compared to control		Adjusted p-value (Benjamini & Hochberg 1995)		Normalised total precursor intensity									Exclusive unique peptide count
	Identified.Proteins..316.	Accession.Number	Alternate.ID	Molecular.Weight	Protein.Grouping.Ambiguity	H4_WT	H4_HB	H4_FD	H4_HB-H4_WT	H4_FLDH4_WT	H4_HB-H4_WT	H4_FD-H4_WT	H4_WT_1	H4_WT_2	H4_WT_3	H4_HB_1	H4_HB_2	H4_HB_3	H4_FD_1	H4_FD_2	H4_FD_3	H4_WT_1	H4_WT_2	H4_WT_3	H4_HB_1	H4_HB_2	H4_HB_3	H4_FD_1	H4_FD_2	H4_FD_3
1	Cluster of Histone-binding protein RBBP7 OS=Homo sapiens OX=9606 GN=RBBP7 PE=1 SV=1 (Q16576)	Q16576 [4]	RBBP7	48 kDa	TRUE	11.5445	12.1913	14.1129	0	1	0.323117	0.00179802	269000000	260000000	314000000	514000000	546000000	424000000	524000000	500000000	368000000	19	18	18	20	19	20	21	18	19
2	Cluster of H4_EGFP_bait	H4_EGFP_bait [3]	Cluster of H4_EGFP_bait	40 kDa	TRUE	11.5071	11.371	12.5582	0	1	0.850377	0.0393556	246000000	301000000	272000000	228000000	307000000	283000000	225000000	158000000	147000000	31	25	32	36	29	32	36	34	30
3	Cluster of Isoform 3 of Importin-5 OS=Homo sapiens OX=9606 GN=IPO5 (O00410-3)	O00410-3 [3]	IPO5	126 kDa	TRUE	9.42785	10.2713	12.316	0	1	0.0920169	0.000165438	56300000	67300000	58000000	132000000	109000000	124000000	170000000	132000000	146000000	46	44	45	54	53	52	55	54	53
4	Histone-binding protein RBBP4 OS=Homo sapiens OX=9606 GN=RBBP4 PE=1 SV=3	Q09028 (+1)	RBBP4	48 kDa	TRUE	11.6943	12.4189	13.8944	0	1	0.31693	0.00651629	284000000	280000000	384000000	623000000	516000000	623000000	334000000	431000000	432000000	11	11	11	11	11	11	12	11	11
5	Cluster of Heat shock 70 kDa protein 1B OS=Homo sapiens OX=9606 GN=HSPA1B PE=1 SV=1 (A0A0G2JIW1)	A0A0G2JIW1 [4]	HSPA1B	70 kDa	TRUE	10.6389	10.6517	11.7824	0	0	0.978459	0.0731567	135000000	172000000	131000000	116000000	224000000	155000000	123000000	117000000	83700000	32	30	31	34	31	32	35	31	29
6	Cluster of Histone acetyltransferase type B catalytic subunit OS=Homo sapiens OX=9606 GN=HAT1 PE=1 SV=1 (O14929)	O14929	HAT1	50 kDa	TRUE	11.5133	11.4804	13.3851	0	1	0.9612	0.0113906	307000000	217000000	308000000	438000000	147000000	411000000	330000000	195000000	379000000	17	16	16	18	16	17	18	17	16
7	Cluster of Nuclear autoantigenic sperm protein OS=Homo sapiens OX=9606 GN=NASP PE=1 SV=2 (P49321)	P49321	NASP	85 kDa	TRUE	10.472	4.03789	0.786099	-1	-1	0.00614422	0.000500721	127000000	127000000	132000000	3676300	4251600	0	0	0	0	53	46	53	2	2	0	0	0	0
8	CON__P00761	CON__P00761	CON__P00761	?	TRUE	13.1172	12.8352	14.8501	0	0	0.844564	0.0675751	782000000	923000000	924000000	810000000	994000000	601000000	562000000	607000000	1090000000	8	8	8	8	8	8	8	9	8
9	Importin-4 OS=Homo sapiens OX=9606 GN=IPO4 PE=1 SV=2	Q8TEX9 (+1)	IPO4	119 kDa	NA	10.5091	0.673094	0.786099	-1	-1	1.46046e-09	1.59061e-09	130000000	122000000	146000000	0	0	0	0	0	0	45	40	42	0	0	0	0	0	0
10	Cluster of Heat shock cognate 71 kDa protein OS=Homo sapiens OX=9606 GN=HSPA8 PE=1 SV=1 (P11142)	P11142 [3]	HSPA8	71 kDa	TRUE	8.59943	8.87675	9.71353	0	1	0.657878	0.0436152	24600000	37700000	39600000	38200000	48000000	45100000	26000000	30200000	30600000	17	15	18	18	19	19	18	17	14
11	Cluster of Tubulin beta chain OS=Homo sapiens OX=9606 GN=TUBB PE=1 SV=2 (P07437)	P07437 [7]	TUBB	50 kDa	TRUE	7.90184	8.34343	8.80414	0	1	0.318232	0.0331901	22500000	22000000	16000000	31600000	26800000	30500000	20100000	16200000	13700000	21	22	21	31	25	24	23	21	19
12	Histone deacetylase 6 OS=Homo sapiens OX=9606 GN=HDAC6 PE=1 SV=2	Q9UBN7	HDAC6	131 kDa	NA	7.96472	7.90913	8.83977	0	1	0.930491	0.0420716	22500000	21800000	18600000	24300000	21400000	18900000	20200000	15400000	15300000	21	19	18	24	18	21	21	20	17
13	Cluster of Tubulin alpha-3C chain OS=Homo sapiens OX=9606 GN=TUBA3C PE=1 SV=1 (P0DPH7)	P0DPH7 [5]	TUBA3C	50 kDa	TRUE	8.93486	9.55095	9.85805	0	0	0.318232	0.0835247	48900000	39800000	38600000	102000000	66700000	52900000	39800000	33300000	24500000	16	17	15	20	17	18	20	17	17
14	Cluster of Importin subunit beta-1 OS=Homo sapiens OX=9606 GN=KPNB1 PE=1 SV=2 (Q14974)	Q14974	KPNB1	97 kDa	TRUE	9.2971	7.37788	5.49388	-1	-1	1.77659e-05	2.13536e-07	52000000	50600000	63400000	16300000	11200000	17200000	2422200	1764100	2052800	31	32	32	23	22	26	10	12	6
15	Endoplasmic reticulum chaperone BiP OS=Homo sapiens OX=9606 GN=HSPA5 PE=1 SV=2	P11021	HSPA5	72 kDa	TRUE	6.92839	7.295	8.83498	0	1	0.347941	0.000500721	10400000	10200000	9069700	16400000	12600000	12400000	21100000	15700000	14300000	16	12	13	19	18	18	17	18	14
16	Cluster of Importin-7 OS=Homo sapiens OX=9606 GN=IPO7 PE=1 SV=1 (O95373)	O95373	IPO7	120 kDa	TRUE	8.92649	5.90848	1.813	-1	-1	0.0249047	0.000181834	35800000	36400000	57700000	3846600	4776200	6761100	0	0	695410	27	26	27	13	11	17	0	0	2
17	Complement component 1 Q subcomponent-binding protein, mitochondrial OS=Homo sapiens OX=9606 GN=C1QBP PE=1 SV=1	Q07021	C1QBP	31 kDa	NA	10.6027	10.2847	13.3985	0	1	0.50968	0.00018774	140000000	134000000	151000000	141000000	106000000	123000000	333000000	303000000	249000000	7	7	7	4	5	6	6	7	6
18	Cluster of Elongation factor 1-alpha 1 OS=Homo sapiens OX=9606 GN=EEF1A1 PE=1 SV=1 (P68104)	P68104	EEF1A1	50 kDa	TRUE	7.87698	7.86437	8.72608	0	0	0.978459	0.0675751	22400000	20000000	16800000	27900000	15300000	21300000	25100000	16600000	9472700	12	12	13	13	11	13	11	12	13
19	26S proteasome non-ATPase regulatory subunit 1 OS=Homo sapiens OX=9606 GN=PSMD1 PE=1 SV=2	Q99460	PSMD1	106 kDa	NA	5.86433	6.40256	5.47503	0	0	0.258386	0.294261	4501500	5052200	4194700	8623400	6393200	6555600	2646100	1379600	2334000	15	16	18	20	19	20	12	6	6
20	26S proteasome non-ATPase regulatory subunit 2 OS=Homo sapiens OX=9606 GN=PSMD2 PE=1 SV=3	Q13200	PSMD2	100 kDa	NA	5.70858	5.94645	5.46345	0	0	0.499217	0.368573	3989100	3711500	4639000	5287600	4856900	5180500	3319900	1541800	1664300	12	13	17	18	18	25	7	6	10
21	Cluster of CTP synthase 1 OS=Homo sapiens OX=9606 GN=CTPS1 PE=1 SV=2 (P17812)	P17812 [2]	CTPS1	67 kDa	TRUE	6.54357	6.30537	7.00203	0	0	0.494134	0.117401	8130700	7014400	7335100	6998500	6829900	6070900	7297500	4864200	4277400	16	13	14	16	11	16	17	18	14
22	Probable serine carboxypeptidase CPVL OS=Homo sapiens OX=9606 GN=CPVL PE=1 SV=2	Q9H3G5	CPVL	54 kDa	NA	7.46324	9.05694	8.08751	1	0	0.00181186	0.0747578	13700000	13500000	16800000	52800000	43100000	54700000	10000000	10600000	10700000	7	7	9	14	13	12	7	8	9
23	Stress-70 protein, mitochondrial OS=Homo sapiens OX=9606 GN=HSPA9 PE=1 SV=2	P38646	HSPA9	74 kDa	TRUE	6.32447	5.48269	6.93478	0	0	0.0759202	0.113964	5630600	8181100	5616500	3978800	3656000	3274100	6538300	5671000	3594100	16	20	16	10	9	8	17	17	11
24	DnaJ homolog subfamily C member 10 OS=Homo sapiens OX=9606 GN=DNAJC10 PE=1 SV=2	Q8IXB1	DNAJC10	91 kDa	NA	6.02522	5.78585	6.49738	0	0	0.463555	0.0909055	5192300	4506100	5839400	5124200	3453300	5375600	3750400	4156900	3662000	13	12	12	13	9	14	12	13	11
25	Cluster of Histone H3 (Fragment) OS=Homo sapiens OX=9606 GN=H3F3B PE=1 SV=1 (K7EK07)	K7EK07 [5]	H3F3B	15 kDa	FALSE	8.48556	0.673094	0.786099	-1	-1	7.67078e-07	8.12353e-07	22200000	55000000	23000000	0	0	0	0	0	0	5	4	3	0	0	0	0	0	0
26	Insulin receptor substrate 4 OS=Homo sapiens OX=9606 GN=IRS4 PE=1 SV=1	O14654	IRS4	134 kDa	NA	4.52513	5.90852	5.25339	1	1	0.000184716	0.00711341	1623300	1791500	1799400	4789600	3888300	6726000	2150000	1442400	1803300	7	3	7	23	19	24	14	8	5
27	Cluster of Nucleosome assembly protein 1-like 1 (Fragment) OS=Homo sapiens OX=9606 GN=NAP1L1 PE=1 SV=1 (F8W118)	F8W118 [3]	NAP1L1	25 kDa	TRUE	8.06077	9.58307	7.98018	1	0	0.00107902	0.767295	18700000	20100000	30500000	70100000	54800000	105000000	9942300	8666500	10800000	7	6	10	12	13	11	4	4	4
28	Cluster of Heterogeneous nuclear ribonucleoprotein M OS=Homo sapiens OX=9606 GN=HNRNPM PE=1 SV=3 (P52272)	P52272	HNRNPM	78 kDa	TRUE	4.92191	5.74841	5.84758	1	1	0.0483214	0.0217941	2473200	1895900	2653800	5963800	2574800	5800100	3493600	2477100	1998900	7	2	3	20	16	21	17	11	9
29	26S proteasome non-ATPase regulatory subunit 11 OS=Homo sapiens OX=9606 GN=PSMD11 PE=1 SV=3	O00231	PSMD11	47 kDa	NA	6.29474	6.51335	6.04343	0	0	0.494134	0.316601	5460400	6840300	6545700	7408500	7231000	8679600	3451500	2269800	3147600	12	14	15	19	16	17	8	7	7
30	26S proteasome regulatory subunit 6B OS=Homo sapiens OX=9606 GN=PSMC4 PE=1 SV=2	P43686	PSMC4	47 kDa	NA	5.82667	6.00357	5.26456	0	0	0.494134	0.026862	3531100	4349400	5818800	5469100	4398000	6361300	1969100	1577800	1824600	9	8	13	12	13	17	5	4	5
31	Cluster of 26S proteasome regulatory subunit 8 OS=Homo sapiens OX=9606 GN=PSMC5 PE=1 SV=1 (P62195)	P62195	PSMC5	46 kDa	TRUE	6.04718	6.52229	6.09544	0	0	0.237997	0.861746	4260600	5289400	6381900	7803400	7141600	8503800	2699300	2849500	3457300	10	13	16	16	16	17	9	5	7
32	Far upstream element-binding protein 2 OS=Homo sapiens OX=9606 GN=KHSRP PE=1 SV=1	A0A087WTP3 (+1)	KHSRP	73 kDa	NA	5.18732	4.99288	5.58819	0	0	0.448742	0.0747578	2712300	2850900	2848700	2511500	2162500	3056100	2752800	2326500	1648900	14	12	13	12	12	13	12	15	9
33	Cluster of Reticulocalbin-2 OS=Homo sapiens OX=9606 GN=RCN2 PE=1 SV=1 (Q14257)	Q14257 [2]	RCN2	37 kDa	TRUE	6.12352	8.73814	7.08373	1	1	0.000319821	0.0416395	6001800	5205300	5375700	43800000	36500000	38300000	4874700	5921900	5903400	5	6	6	14	13	14	10	9	6
34	Cluster of Actin, cytoplasmic 1 OS=Homo sapiens OX=9606 GN=ACTB PE=1 SV=1 (P60709)	P60709 [2]	ACTB	42 kDa	TRUE	6.56993	6.25593	7.38743	0	1	0.412079	0.0281992	10000000	6935300	6337700	6905800	4602900	8473100	8316000	6338300	5891300	9	10	10	10	7	10	10	9	10
35	Cluster of Nucleolin OS=Homo sapiens OX=9606 GN=NCL PE=1 SV=3 (P19338)	P19338	NCL	77 kDa	TRUE	6.11415	6.18308	6.99908	0	1	0.895725	0.0134621	5099500	5518500	5874400	6065800	4521400	8373700	5009300	5502800	5308300	8	11	10	11	10	11	11	10	10
36	60 kDa heat shock protein, mitochondrial OS=Homo sapiens OX=9606 GN=HSPD1 PE=1 SV=2	P10809	HSPD1	61 kDa	NA	6.06108	5.75809	5.80081	0	0	0.417851	0.368155	4471100	6380900	5142100	4867200	3390000	5432300	2658800	2046600	2845400	11	16	14	12	7	10	6	3	5
37	26S proteasome regulatory subunit 4 OS=Homo sapiens OX=9606 GN=PSMC1 PE=1 SV=1	P62191	PSMC1	49 kDa	NA	5.75604	6.2219	6.15787	0	0	0.307827	0.259726	2816100	5126700	5300700	5026200	6099300	8037800	3722400	2355700	3487500	7	7	9	15	13	16	3	4	4
38	Cluster of 26S proteasome regulatory subunit 10B OS=Homo sapiens OX=9606 GN=PSMC6 PE=1 SV=1 (A0A087X2I1)	A0A087X2I1 [2]	PSMC6	46 kDa	TRUE	5.78329	6.19142	5.22177	0	0	0.152969	0.0387717	4179600	4406200	4363600	6085300	5506900	6850800	1734200	1851000	1618200	11	10	10	12	12	12	8	5	6
39	Zinc finger protein ZFPM1 OS=Homo sapiens OX=9606 GN=ZFPM1 PE=1 SV=2	Q8IX07	ZFPM1	105 kDa	NA	0.68078	4.51345	4.49492	1	1	1.0307e-06	9.78727e-07	0	0	0	1991600	1847800	1533500	1378800	1042500	938100	0	0	0	13	12	11	17	14	9
40	Zinc finger protein 521 OS=Homo sapiens OX=9606 GN=ZNF521 PE=1 SV=1	Q96K83	ZNF521	148 kDa	TRUE	0.68078	4.58216	4.66834	1	1	1.00326e-05	8.29423e-06	0	0	0	2413300	1867300	1450800	1918600	1050800	943960	0	0	0	17	12	9	13	7	9
41	40S ribosomal protein S2 OS=Homo sapiens OX=9606 GN=RPS2 PE=1 SV=2	P15880	RPS2	31 kDa	NA	5.77325	5.715	6.67283	0	1	0.90878	0.0118135	4455300	4043100	4366100	5327500	3157000	4834500	4526700	3923500	4494400	7	6	7	8	6	9	7	7	6
42	Cluster of 26S proteasome non-ATPase regulatory subunit 3 OS=Homo sapiens OX=9606 GN=PSMD3 PE=1 SV=2 (O43242)	O43242	PSMD3	61 kDa	TRUE	5.94228	6.02265	5.36677	0	0	0.904803	0.109369	5320900	4468900	4766700	4578800	4743500	7378600	1666600	1727700	2339100	5	8	8	14	9	12	6	7	6
43	Cluster of 26S proteasome regulatory subunit 6A OS=Homo sapiens OX=9606 GN=PSMC3 PE=1 SV=1 (R4GNH3)	R4GNH3 [2]	PSMC3	47 kDa	TRUE	6.37602	6.74227	6.14625	0	0	0.330761	0.428344	5238200	7654000	7292900	9846000	8770700	8824400	3329900	2752800	3239800	9	10	11	12	13	15	9	6	7
44	26S proteasome non-ATPase regulatory subunit 13 OS=Homo sapiens OX=9606 GN=PSMD13 PE=1 SV=2	Q9UNM6	PSMD13	43 kDa	NA	6.04398	6.38089	5.6927	0	0	0.184791	0.102048	4539400	4646100	6791300	6912900	6724400	7448000	2908200	2049500	2150500	9	10	10	12	9	14	6	7	4
45	60S ribosomal protein L3 OS=Homo sapiens OX=9606 GN=RPL3 PE=1 SV=2	P39023	RPL3	46 kDa	NA	5.50767	5.73455	6.90795	0	1	0.758479	0.0245739	2136800	3850600	5476600	6871400	2184400	5795700	6746800	3875500	4848600	6	6	6	5	4	8	9	8	6
46	60S ribosomal protein L4 OS=Homo sapiens OX=9606 GN=RPL4 PE=1 SV=5	P36578	RPL4	48 kDa	NA	6.06761	6.13185	7.12434	0	1	0.895725	0.00387185	5966800	3876800	6497400	6338300	4282200	7539700	6615400	5343100	5325800	9	8	9	9	6	8	13	9	8
47	Cluster of 40S ribosomal protein S4, X isoform OS=Homo sapiens OX=9606 GN=RPS4X PE=1 SV=2 (P62701)	P62701	RPS4X	30 kDa	TRUE	6.35554	6.37476	6.40997	0	0	0.960808	0.826152	5362700	6388800	8212300	6637700	6914400	7433700	3665500	3883000	3412000	7	5	5	8	5	8	9	8	6
48	Nucleosome assembly protein 1-like 4 OS=Homo sapiens OX=9606 GN=NAP1L4 PE=1 SV=1	Q99733 (+1)	NAP1L4	43 kDa	TRUE	6.74759	7.59931	6.8279	1	0	0.019183	0.75695	7215100	8310200	11000000	16400000	14000000	22300000	5640400	3536400	5404000	6	5	7	10	9	11	4	4	4
49	Cluster of 40S ribosomal protein S3 OS=Homo sapiens OX=9606 GN=RPS3 PE=1 SV=2 (P23396)	P23396	RPS3	27 kDa	TRUE	6.35799	6.46679	6.84497	0	0	0.79645	0.0943251	6233600	6174100	7308500	8517500	5226700	9611400	4842300	5509500	4131000	9	9	7	9	9	10	11	9	8
50	26S proteasome regulatory subunit 7 OS=Homo sapiens OX=9606 GN=PSMC2 PE=1 SV=3	P35998	PSMC2	49 kDa	NA	6.43829	6.67795	6.11074	0	0	0.584272	0.327994	6937600	6211800	7771300	8761000	9526800	7856200	2852100	3081400	3128700	8	6	9	10	10	11	9	5	7
51	Cluster of 40S ribosomal protein S3a OS=Homo sapiens OX=9606 GN=RPS3A PE=1 SV=2 (P61247)	P61247	RPS3A	30 kDa	TRUE	6.1899	5.89825	6.67874	0	0	0.50968	0.183896	5735000	4294000	8005200	4240700	4953300	5724200	3866000	5085600	4058300	9	7	9	7	7	9	9	7	6
52	Cluster of Poly(rC)-binding protein 2 OS=Homo sapiens OX=9606 GN=PCBP2 PE=1 SV=1 (F8VZX2)	F8VZX2 [11]	PCBP2	34 kDa	TRUE	5.6263	5.20748	5.67942	0	0	0.170733	0.81443	4197400	3374000	4041000	3749800	2058800	3469200	2857400	2238400	1954900	10	9	6	7	6	8	7	6	6
53	Cluster of Histone chaperone ASF1B OS=Homo sapiens OX=9606 GN=ASF1B PE=1 SV=1 (Q9NVP2)	Q9NVP2	ASF1B	22 kDa	TRUE	10.0891	0.673094	0.786099	-1	-1	9.62177e-09	1.05177e-08	91600000	112000000	89900000	0	0	0	0	0	0	8	8	9	0	0	0	0	0	0
54	Fatty acid synthase OS=Homo sapiens OX=9606 GN=FASN PE=1 SV=3	P49327	FASN	273 kDa	NA	5.17469	4.96827	5.12169	0	0	0.439301	0.793554	3144000	2548100	2667700	2488200	2142800	2945300	1977900	1347800	1637600	12	6	9	9	4	4	11	6	4
55	Nucleophosmin OS=Homo sapiens OX=9606 GN=NPM1 PE=1 SV=2	P06748 (+1)	NPM1	33 kDa	NA	6.28471	6.12015	6.54765	0	0	0.745335	0.432677	5173800	4420900	10700000	6622700	3639000	8378500	4614500	3910800	3527800	7	6	6	6	5	6	6	4	5
56	Cluster of Y-box-binding protein 1 OS=Homo sapiens OX=9606 GN=YBX1 PE=1 SV=3 (P67809)	P67809 [2]	YBX1	36 kDa	TRUE	5.85219	5.40912	6.49816	0	0	0.376011	0.118642	4124300	3809400	6015100	3717100	4080500	2630700	4001800	4543700	3164900	6	7	7	5	5	10	11	8	7
57	Protein RCC2 OS=Homo sapiens OX=9606 GN=RCC2 PE=1 SV=2	Q9P258	RCC2	56 kDa	NA	5.1989	4.93422	5.78042	0	0	0.394832	0.045557	2768400	2950300	2760600	2655800	2433100	2210600	2789000	2470500	2178400	5	6	7	8	6	8	11	10	4
58	Histone-binding protein RBBP4 (Fragment) OS=Homo sapiens OX=9606 GN=RBBP4 PE=1 SV=1	E9PND5	RBBP4	8 kDa	TRUE	11.3305	7.83531	8.84496	0	0	0.584272	0.604796	217000000	179000000	360000000	0	303000000	264000000	0	323000000	90500000	1	1	1	0	1	1	0	1	1
59	Thioredoxin OS=Homo sapiens OX=9606 GN=TXN PE=1 SV=3	P10599	TXN	12 kDa	NA	8.43431	8.50869	10.0299	0	1	0.912662	0.00312718	21700000	28000000	42600000	34400000	35600000	29900000	44600000	31400000	32000000	5	6	5	7	6	7	5	6	7
60	60S ribosomal protein L6 OS=Homo sapiens OX=9606 GN=RPL6 PE=1 SV=3	Q02878	RPL6	33 kDa	NA	6.3051	6.44553	6.67412	0	0	0.636085	0.115068	6710200	5392200	6924200	8272200	5224400	9441900	5823900	4323700	3251200	7	5	8	5	3	5	8	9	8
61	E3 ubiquitin-protein ligase HUWE1 OS=Homo sapiens OX=9606 GN=HUWE1 PE=1 SV=3	Q7Z6Z7 (+2)	HUWE1	482 kDa	TRUE	3.73384	4.3194	1.41872	0	-1	0.494134	0.0114614	576000	1507200	1084800	1562000	1365800	1764300	378780	0	0	4	3	5	12	11	14	2	0	0
62	Proteasome subunit alpha type-7 OS=Homo sapiens OX=9606 GN=PSMA7 PE=1 SV=1	O14818	PSMA7	28 kDa	NA	6.27965	6.91529	5.93968	1	0	0.019183	0.103117	4907400	6411700	7574700	9989500	8393300	13600000	3231000	2830200	2224700	7	6	7	9	7	8	7	6	5
63	Death domain-associated protein 6 OS=Homo sapiens OX=9606 GN=DAXX PE=1 SV=2	Q9UER7	DAXX	81 kDa	NA	7.95145	0.673094	0.786099	-1	-1	7.54405e-09	8.46742e-09	18800000	21800000	21800000	0	0	0	0	0	0	15	11	15	0	0	0	0	0	0
64	Crk-like protein OS=Homo sapiens OX=9606 GN=CRKL PE=1 SV=1	P46109	CRKL	34 kDa	NA	6.97767	6.41308	7.61225	0	0	0.318232	0.164911	15000000	9530300	7406000	6553100	7605600	7414000	10100000	8526900	5537900	5	6	7	7	2	5	6	6	7
65	Melanoma-associated antigen D2 OS=Homo sapiens OX=9606 GN=MAGED2 PE=1 SV=2	Q9UNF1	MAGED2	65 kDa	NA	4.06656	4.16107	5.27118	0	0	0.93297	0.0857899	1706900	653360	1756600	2110700	867400	1467300	3860700	1332900	1180400	4	3	5	6	3	5	6	6	4
66	Cluster of Transcriptional regulator ATRX OS=Homo sapiens OX=9606 GN=ATRX PE=1 SV=5 (P46100)	P46100 [2]	ATRX	283 kDa	TRUE	4.96584	0.673094	0.786099	-1	-1	2.96015e-08	3.61178e-08	2054500	2344800	2847600	0	0	0	0	0	0	21	20	23	0	0	0	0	0	0
67	26S proteasome non-ATPase regulatory subunit 12 OS=Homo sapiens OX=9606 GN=PSMD12 PE=1 SV=3	O00232	PSMD12	53 kDa	NA	5.91142	6.32305	6.11908	0	0	0.331882	0.522166	4758700	4003200	5612300	6918900	5947600	7450900	3033000	2339800	3944200	7	6	9	11	11	10	5	4	5
68	60S ribosomal protein L15 OS=Homo sapiens OX=9606 GN=RPL15 PE=1 SV=2	P61313	RPL15	24 kDa	NA	4.48726	5.02948	5.48619	0	1	0.127515	0.00938591	1512100	1861400	1710700	3099500	1943600	2995300	1994300	1884000	2264900	4	3	4	5	5	7	7	7	5
69	Cluster of Heat shock protein HSP 90-beta OS=Homo sapiens OX=9606 GN=HSP90AB1 PE=1 SV=4 (P08238)	P08238 [3]	HSP90AB1	83 kDa	TRUE	5.68764	5.07793	0.786099	-1	-1	0.0291129	8.12475e-08	3177000	3561500	5868700	2670200	2256600	3327100	0	0	0	8	9	7	6	6	5	0	0	0
70	60S ribosomal protein L7a OS=Homo sapiens OX=9606 GN=RPL7A PE=1 SV=2	P62424	RPL7A	30 kDa	NA	5.94085	5.48325	6.7577	0	1	0.127515	0.0111352	5734600	4002800	4929800	3841200	2683700	4778200	5810900	3799300	4311100	6	7	8	8	5	6	8	7	9
71	Serine/threonine-protein phosphatase 2A 65 kDa regulatory subunit A alpha isoform OS=Homo sapiens OX=9606 GN=PPP2R1A PE=1 SV=4	P30153	PPP2R1A	65 kDa	NA	5.04114	2.75113	6.27628	0	0	0.0881401	0.242413	1731400	2700500	3479500	0	1308400	833860	5280500	3062700	2424700	4	7	8	0	3	2	13	11	11
72	60S ribosomal protein L7 OS=Homo sapiens OX=9606 GN=RPL7 PE=1 SV=1	P18124	RPL7	29 kDa	NA	5.96342	6.18154	7.09574	0	1	0.674937	0.0200212	4272500	4845300	5781200	7797200	4965800	5776200	4870200	5492200	6506500	6	6	7	2	3	6	7	7	5
73	Cluster of 26S proteasome non-ATPase regulatory subunit 6 OS=Homo sapiens OX=9606 GN=PSMD6 PE=1 SV=1 (Q15008)	Q15008	PSMD6	46 kDa	TRUE	5.64434	6.03067	5.9403	0	0	0.372571	0.368573	3918800	4474000	3364700	6273300	5016900	5070800	3462400	2001600	2946300	5	8	6	9	8	8	3	2	4
74	Cluster of 60S acidic ribosomal protein P0 OS=Homo sapiens OX=9606 GN=RPLP0 PE=1 SV=1 (P05388)	P05388	RPLP0	34 kDa	TRUE	6.63106	6.69575	7.53731	0	1	0.81584	0.00112516	7793100	7300700	8948100	9265200	6325800	12100000	9210900	7030500	6362200	6	6	7	7	6	7	6	6	5
75	60S ribosomal protein L12 OS=Homo sapiens OX=9606 GN=RPL12 PE=1 SV=1	P30050	RPL12	18 kDa	NA	6.75227	6.88967	8.10766	0	1	0.651289	0.000540996	8634100	6611500	11700000	8918800	8365300	14500000	12700000	10400000	9094000	6	6	6	6	4	6	6	5	5
76	40S ribosomal protein S9 OS=Homo sapiens OX=9606 GN=RPS9 PE=1 SV=1	A0A024R4M0 (+1)	RPS9	23 kDa	NA	5.83434	5.4223	6.21469	0	0	0.307827	0.23949	5295100	3319800	5135500	2696900	3635400	4318500	3672100	3578000	2588900	6	5	5	5	3	5	6	5	5
77	Protein phosphatase 1G OS=Homo sapiens OX=9606 GN=PPM1G PE=1 SV=1	O15355	PPM1G	59 kDa	NA	6.00857	5.82235	0.786099	0	-1	0.536233	1.34783e-07	4323800	4533600	6773400	5695500	3015000	6072400	0	0	0	10	5	7	8	6	8	0	0	0
79	Proteasome activator complex subunit 3 OS=Homo sapiens OX=9606 GN=PSME3 PE=1 SV=1	P61289 (+1)	PSME3	30 kDa	NA	5.72788	6.16417	6.01954	0	0	0.0490125	0.106699	3975700	3975200	4524000	5653900	5621400	6796400	3389000	2646100	2632600	4	3	4	9	8	9	6	6	6
80	60S ribosomal protein L18 (Fragment) OS=Homo sapiens OX=9606 GN=RPL18 PE=1 SV=1	J3QQ67 (+1)	RPL18	22 kDa	NA	6.7616	6.23501	7.53863	0	0	0.331882	0.0964628	10600000	6686100	9521100	5553500	7070800	6339900	6374500	7534300	8333000	4	5	5	6	5	6	6	5	5
81	60S ribosomal protein L5 (Fragment) OS=Homo sapiens OX=9606 GN=RPL5 PE=1 SV=1	A0A2R8Y6J3 (+1)	RPL5	27 kDa	NA	6.09206	6.3618	7.02211	0	1	0.268174	0.00190763	4787500	4814100	6892300	6784300	6331100	7766900	6506700	5394400	4446700	3	4	5	6	4	6	6	6	6
82	Ubiquinol-cytochrome-c reductase complex assembly factor 2 OS=Homo sapiens OX=9606 GN=UQCC2 PE=1 SV=1	Q9BRT2 (+1)	UQCC2	15 kDa	NA	7.0601	8.42097	9.2926	1	1	0.00922255	0.000489325	10400000	8697700	14400000	37700000	30900000	25900000	27700000	19500000	20700000	3	3	3	4	4	3	3	4	4
83	Isoform Long of Proteasome subunit alpha type-1 OS=Homo sapiens OX=9606 GN=PSMA1	P25786-2	PSMA1	30 kDa	NA	4.46463	5.72378	2.19617	0	-1	0.133903	0.0113906	1513100	1674800	1815100	4699500	3352600	5271400	503950	344300	0	3	4	3	7	7	9	2	2	0
84	Proteasome subunit alpha type-5 OS=Homo sapiens OX=9606 GN=PSMA5 PE=1 SV=3	P28066	PSMA5	26 kDa	NA	5.95555	6.64989	6.29936	0	0	0.129202	0.327994	3822800	5118000	6027200	9099400	7233500	9574000	3504900	4644800	2434000	6	4	5	7	7	7	5	4	4
85	Histone chaperone ASF1A OS=Homo sapiens OX=9606 GN=ASF1A PE=1 SV=1	Q9Y294	ASF1A	23 kDa	TRUE	10.6558	0.673094	0.786099	-1	-1	1.60414e-08	1.7445e-08	195000000	112000000	145000000	0	0	0	0	0	0	6	5	7	0	0	0	0	0	0
86	40S ribosomal protein S12 OS=Homo sapiens OX=9606 GN=RPS12 PE=1 SV=3	P25398	RPS12	15 kDa	NA	5.9256	5.94454	6.73817	0	1	0.960808	0.0243101	4484600	5469500	4445900	4572900	5422900	5325700	4893900	4619400	4010500	4	4	6	5	3	7	6	4	4
87	Cluster of Heat shock 70 kDa protein 4 OS=Homo sapiens OX=9606 GN=HSPA4 PE=1 SV=4 (P34932)	P34932	HSPA4	94 kDa	TRUE	4.28407	4.53411	5.49406	0	0	0.852811	0.14604	1813000	1249700	1361100	2553100	1476900	1583200	1472200	1175000	4837100	6	3	8	7	6	5	6	4	3
88	Cluster of E3 ubiquitin-protein ligase SHPRH OS=Homo sapiens OX=9606 GN=SHPRH PE=1 SV=2 (Q149N8)	Q149N8	SHPRH	193 kDa	TRUE	0.68078	5.1927	4.88112	1	1	6.20195e-07	8.62946e-07	0	0	0	2542300	3152800	3162900	1650200	1581200	1064600	0	0	0	11	9	4	6	4	3
89	Cluster of 26S proteasome non-ATPase regulatory subunit 4 OS=Homo sapiens OX=9606 GN=PSMD4 PE=1 SV=1 (P55036)	P55036	PSMD4	41 kDa	TRUE	6.49169	6.97716	6.6859	0	0	0.172384	0.473665	7888400	6042300	7880600	10100000	10600000	12000000	5632100	3206400	4604400	6	5	5	5	5	5	3	5	5
90	Proteasome subunit alpha type OS=Homo sapiens OX=9606 GN=PSMA6 PE=1 SV=1	G3V5Z7 (+1)	PSMA6	28 kDa	NA	6.21573	6.59715	6.93017	0	0	0.50968	0.141406	4387600	6126300	7742200	8482500	7389900	8915900	3625300	5866200	5904300	4	4	3	8	7	7	4	3	2
91	40S ribosomal protein S5 (Fragment) OS=Homo sapiens OX=9606 GN=RPS5 PE=1 SV=1	M0R0F0 (+1)	RPS5	22 kDa	NA	5.96247	5.83304	6.51512	0	0	0.742862	0.0675751	5117700	4585000	5057700	4556400	3303100	7124300	4715000	4410100	2894600	6	7	5	8	6	6	5	5	4
92	40S ribosomal protein S8 OS=Homo sapiens OX=9606 GN=RPS8 PE=1 SV=2	P62241	RPS8	24 kDa	NA	6.88317	6.28718	7.31495	0	0	0.0920169	0.133149	7906100	9254200	12100000	7301000	5273500	7396200	7189200	5082200	7338400	3	3	3	5	4	5	6	5	4
93	Cluster of Ketosamine-3-kinase OS=Homo sapiens OX=9606 GN=FN3KRP PE=1 SV=2 (Q9HA64)	Q9HA64	FN3KRP	34 kDa	TRUE	6.13582	6.17764	7.54212	0	0	0.960808	0.0518251	4544400	8350400	4509300	3990700	7234200	7673600	5441900	10200000	7178300	5	2	3	5	2	3	6	4	3
94	U2 small nuclear ribonucleoprotein A' OS=Homo sapiens OX=9606 GN=SNRPA1 PE=1 SV=2	P09661	SNRPA1	28 kDa	NA	5.29134	5.12607	5.35478	0	0	0.836754	0.875888	4482900	2641100	2300100	2247700	2688100	3679200	3283300	1214800	1746700	5	5	3	5	6	4	5	5	6
95	DNA replication licensing factor MCM2 OS=Homo sapiens OX=9606 GN=MCM2 PE=1 SV=4	P49736	MCM2	102 kDa	NA	5.88554	0.673094	0.786099	-1	-1	1.008e-08	1.18478e-08	4461100	4495500	5018600	0	0	0	0	0	0	17	14	14	0	0	0	0	0	0
96	DnaJ homolog subfamily C member 9 OS=Homo sapiens OX=9606 GN=DNAJC9 PE=1 SV=1	Q8WXX5	DNAJC9	30 kDa	NA	8.84177	0.673094	0.786099	-1	-1	1.8899e-08	2.0941e-08	48200000	34900000	36500000	0	0	0	0	0	0	10	10	11	0	0	0	0	0	0
97	Proteasome subunit beta type-1 OS=Homo sapiens OX=9606 GN=PSMB1 PE=1 SV=2	P20618	PSMB1	26 kDa	NA	6.5155	6.90914	6.20608	0	0	0.307827	0.298638	5781200	9516900	7155600	9519300	9652000	12100000	3411400	3364200	2897300	5	3	4	6	5	5	3	3	3
98	Cluster of Proteasome subunit alpha type (Fragment) OS=Homo sapiens OX=9606 GN=PSMA4 PE=1 SV=1 (H0YL69)	H0YL69 [2]	PSMA4	26 kDa	TRUE	6.43986	6.84545	6.46255	0	0	0.170733	0.906498	8038600	5306000	7881700	9066900	7231300	15100000	4653600	3478700	3366900	3	3	3	5	7	5	5	3	3
99	Cluster of Proteasome subunit alpha type-3 OS=Homo sapiens OX=9606 GN=PSMA3 PE=1 SV=2 (P25788)	P25788 [2]	PSMA3	28 kDa	TRUE	5.33432	5.80283	0.786099	0	-1	0.318232	5.33257e-06	4557300	1879500	3555500	4100200	3659900	6634900	0	0	0	6	4	5	8	6	7	0	0	0
100	Chromatin assembly factor 1 subunit A OS=Homo sapiens OX=9606 GN=CHAF1A PE=1 SV=3	Q13111	CHAF1A	107 kDa	NA	5.9176	0.673094	0.786099	-1	-1	5.10815e-08	5.99483e-08	3521200	5156800	5986500	0	0	0	0	0	0	14	11	17	0	0	0	0	0	0
101	Programmed cell death protein 6 OS=Homo sapiens OX=9606 GN=PDCD6 PE=1 SV=1	O75340	PDCD6	22 kDa	NA	5.87818	5.98232	6.67088	0	1	0.758479	0.0113906	4098300	5097000	4730800	5454000	4249600	6307700	4545000	4611800	3802200	4	4	4	4	4	4	5	4	3
102	Cysteine and glycine-rich protein 2 OS=Homo sapiens OX=9606 GN=CSRP2 PE=1 SV=3	Q16527	CSRP2	21 kDa	NA	4.96619	5.24243	5.67008	0	0	0.536233	0.075428	3086900	2025200	2167500	3822600	2524100	2946200	3195200	2474900	1571300	4	4	4	3	3	4	3	4	4
103	Proteasome subunit beta type-5 OS=Homo sapiens OX=9606 GN=PSMB5 PE=1 SV=3	P28074	PSMB5	28 kDa	NA	5.73286	6.28661	5.94224	0	0	0.131968	0.451131	4556100	3247000	4901700	6022400	7166700	6460500	3313400	2284400	2700400	4	4	5	8	5	7	3	3	3
104	DnaJ homolog subfamily A member 1 OS=Homo sapiens OX=9606 GN=DNAJA1 PE=1 SV=2	P31689	DNAJA1	45 kDa	NA	3.25565	5.92637	2.99879	0	0	0.202883	0.861746	2900200	0	1085200	4297500	5230500	5673400	1598400	519500	0	3	0	3	7	7	8	3	2	0
105	26S proteasome non-ATPase regulatory subunit 7 OS=Homo sapiens OX=9606 GN=PSMD7 PE=1 SV=2	P51665	PSMD7	37 kDa	NA	5.82289	6.1511	2.33996	0	-1	0.904803	0.0421986	5350000	3142300	5244800	4573300	5942500	7759200	2377800	0	0	3	6	5	7	5	3	2	0	0
106	60S ribosomal protein L11 OS=Homo sapiens OX=9606 GN=RPL11 PE=1 SV=2	P62913 (+2)	RPL11	20 kDa	NA	6.27383	5.84845	6.89844	0	1	0.202883	0.0446845	5902000	5244300	7604300	5193100	3028500	7074600	5640800	4297700	5065400	4	3	3	4	4	4	5	5	4
107	Cluster of BolA-like protein 2 OS=Homo sapiens OX=9606 GN=BOLA2 PE=1 SV=1 (Q9H3K6)	Q9H3K6	BOLA2	10 kDa	TRUE	6.96019	6.91575	7.55357	0	0	0.947722	0.133149	14000000	8377600	8763300	10600000	10500000	10000000	8605100	6561900	7465900	4	3	4	4	3	4	4	4	4
108	Cluster of Ubiquinol-cytochrome-c reductase complex assembly factor 1 OS=Homo sapiens OX=9606 GN=UQCC1 PE=1 SV=3 (Q9NVA1)	Q9NVA1 [2]	UQCC1	35 kDa	TRUE	4.40771	7.36675	8.21051	0	0	0.176358	0.0568112	6496200	0	6164800	13700000	13500000	16400000	20700000	8701800	8376200	2	0	3	6	5	5	5	5	4
109	Cluster of Profilin OS=Homo sapiens OX=9606 GN=PFN2 PE=1 SV=1 (G5E9Q6)	G5E9Q6 [3]	PFN2	21 kDa	TRUE	6.69165	6.46237	3.0245	0	0	0.947722	0.0966409	7197700	5952200	13800000	7927900	6992400	7453400	9310700	0	0	5	5	3	5	4	6	5	0	0
110	Proteasome subunit beta type-2 OS=Homo sapiens OX=9606 GN=PSMB2 PE=1 SV=1	P49721	PSMB2	23 kDa	NA	5.4504	5.96816	2.54351	0	0	0.850377	0.0946189	3201600	3648200	3334600	5088800	4859700	5667800	3568200	0	0	6	4	4	7	6	7	2	0	0
112	Sequestosome-1 OS=Homo sapiens OX=9606 GN=SQSTM1 PE=1 SV=1	Q13501	SQSTM1	48 kDa	NA	4.46021	4.98156	2.58022	0	0	0.680845	0.0731567	1031400	1804500	2484900	2551300	3334100	1820000	613900	0	571770	5	4	6	5	4	6	2	0	2
113	60S ribosomal protein L31 OS=Homo sapiens OX=9606 GN=RPL31 PE=1 SV=1	P62899	RPL31	14 kDa	NA	6.44985	6.22119	7.09268	0	1	0.494134	0.0397866	7047900	6284400	7749500	6383900	6139400	6191400	9050200	4426000	4550900	3	3	3	4	3	5	3	4	4
114	DNA replication licensing factor MCM6 OS=Homo sapiens OX=9606 GN=MCM6 PE=1 SV=1	Q14566	MCM6	93 kDa	NA	4.90805	0.673094	0.786099	-1	-1	2.96015e-08	3.61178e-08	2003300	2165800	2791500	0	0	0	0	0	0	13	11	9	0	0	0	0	0	0
115	60S ribosomal protein L17 (Fragment) OS=Homo sapiens OX=9606 GN=RPL17 PE=1 SV=1	A0A087WXM6 (+5)	RPL17	20 kDa	NA	6.13775	6.49607	7.3169	0	1	0.465197	0.0175578	3793400	5385000	8668200	7411600	7125400	8472300	6230000	5554200	7686500	3	2	3	3	3	4	3	3	3
116	60S acidic ribosomal protein P2 OS=Homo sapiens OX=9606 GN=RPLP2 PE=1 SV=1	P05387	RPLP2	12 kDa	TRUE	7.38195	7.17104	8.72277	0	0	0.852811	0.0747578	12900000	16100000	12400000	9166600	15500000	13700000	9494300	19600000	19400000	4	2	3	3	2	3	4	2	2
117	Cofilin-1 OS=Homo sapiens OX=9606 GN=CFL1 PE=1 SV=3	P23528	CFL1	19 kDa	TRUE	7.01271	6.83025	7.28569	0	0	0.680845	0.390165	13100000	9710600	9055400	10800000	7136800	12300000	6589100	5775600	6638000	3	4	3	4	3	3	6	5	4
119	40S ribosomal protein S23 OS=Homo sapiens OX=9606 GN=RPS23 PE=1 SV=3	P62266	RPS23	16 kDa	NA	6.40551	6.07782	4.74579	0	0	0.927827	0.358569	7322500	7299900	5761300	3816300	5037200	9507400	5470400	4147400	0	4	3	3	6	2	4	3	2	0
120	60S ribosomal protein L10a OS=Homo sapiens OX=9606 GN=RPL10A PE=1 SV=2	P62906	RPL10A	25 kDa	NA	5.58089	5.33208	6.57285	0	1	0.50968	0.0130626	3907100	2567600	5238500	3557200	2368200	4193000	4339900	3641600	4191900	5	3	4	4	3	3	5	4	4
121	Cluster of Ubiquitin-40S ribosomal protein S27a OS=Homo sapiens OX=9606 GN=RPS27A PE=1 SV=2 (P62979)	P62979	RPS27A	18 kDa	TRUE	9.1268	9.59035	10.1328	0	0	0.714539	0.26069	28800000	71500000	56000000	76800000	123000000	39900000	26800000	41600000	46500000	3	3	4	4	3	4	4	3	3
122	Uncharacterized protein OS=Homo sapiens OX=9606 PE=3 SV=2	H3BNC9	Uncharacterized protein OS=Homo sapiens OX=9606 PE=3 SV=2	65 kDa	NA	6.50759	6.3467	7.25779	0	0	0.745335	0.0567884	8209000	6209900	7610900	6353300	5610800	9179000	5573500	7505500	5671400	4	4	4	4	4	4	4	3	4
123	60S ribosomal protein L18a OS=Homo sapiens OX=9606 GN=RPL18A PE=1 SV=1	M0R117 (+3)	RPL18A	18 kDa	NA	5.8247	5.84408	6.78977	0	1	0.960808	0.0118986	4517000	5180400	3725100	4685400	3545500	6565100	4940400	4762600	4237500	4	2	3	5	4	5	6	5	5
124	40S ribosomal protein S18 OS=Homo sapiens OX=9606 GN=RPS18 PE=1 SV=3	P62269	RPS18	18 kDa	NA	6.10222	6.04759	6.49824	0	0	0.912662	0.150102	6145200	4474900	5857700	5225700	3915200	8394700	4018500	3776900	3786600	4	3	3	4	4	3	5	4	4
125	Chromatin assembly factor 1 subunit B OS=Homo sapiens OX=9606 GN=CHAF1B PE=1 SV=1	Q13112	CHAF1B	61 kDa	NA	6.1963	0.673094	0.786099	-1	-1	4.13731e-08	4.81638e-08	6802300	5153700	5607700	0	0	0	0	0	0	9	11	12	0	0	0	0	0	0
126	Cluster of Calumenin OS=Homo sapiens OX=9606 GN=CALU PE=1 SV=2 (O43852)	O43852 [2]	CALU	37 kDa	TRUE	0.68078	5.83781	0.786099	1	0	2.04632e-08	0.509964	0	0	0	5024700	4184000	5011200	0	0	0	0	0	0	11	10	10	0	0	0
127	60S ribosomal protein L14 OS=Homo sapiens OX=9606 GN=RPL14 PE=1 SV=1	E7EPB3 (+1)	RPL14	15 kDa	NA	6.4223	6.52449	7.32939	0	1	0.832262	0.0139886	8083300	6954100	5674200	7324600	7286300	8938200	7931700	5717200	6129600	3	3	4	4	3	4	4	4	4
128	Zinc finger protein 423 OS=Homo sapiens OX=9606 GN=ZNF423 PE=1 SV=1	F5H7S1 (+2)	ZNF423	132 kDa	TRUE	0.68078	4.1637	3.56699	1	1	2.04163e-06	7.27664e-06	0	0	0	1283100	1468500	1399400	852960	481070	577660	0	0	0	4	3	4	3	2	2
129	Cluster of 60S ribosomal protein L10 OS=Homo sapiens OX=9606 GN=RPL10 PE=1 SV=2 (F8W7C6)	F8W7C6	RPL10	19 kDa	TRUE	6.53306	6.51016	7.74235	0	1	0.960808	0.0113906	5710500	6206500	11800000	6444300	7293700	9886500	12600000	5561300	8755400	4	3	2	4	4	3	3	5	3
130	DnaJ homolog subfamily A member 2 OS=Homo sapiens OX=9606 GN=DNAJA2 PE=1 SV=1	O60884	DNAJA2	46 kDa	NA	2.93722	5.74344	0.786099	1	0	0.0463952	0.0731567	1404300	0	1137400	5564100	3983000	3820300	0	0	0	2	0	4	8	6	7	0	0	0
131	Proteasomal ubiquitin receptor ADRM1 OS=Homo sapiens OX=9606 GN=ADRM1 PE=1 SV=2	Q16186	ADRM1	42 kDa	NA	5.71208	5.54087	4.08577	0	0	0.947722	0.298638	4535800	3426800	4442400	2230800	5801200	4151200	3595800	0	1764200	5	4	4	6	6	5	2	0	3
132	40S ribosomal protein S16 OS=Homo sapiens OX=9606 GN=RPS16 PE=1 SV=2	P62249	RPS16	16 kDa	NA	6.59561	6.55175	7.26791	0	1	0.927827	0.0237259	8953500	7477900	6966900	7652800	6280500	10700000	7451800	6122600	5421500	3	3	4	3	3	4	3	3	3
133	40S ribosomal protein S11 OS=Homo sapiens OX=9606 GN=RPS11 PE=1 SV=3	P62280	RPS11	18 kDa	NA	5.5012	5.35073	3.9998	0	0	0.949866	0.306492	4139700	2684100	3936000	3922700	2542300	3652500	2624200	0	2011200	3	3	4	3	3	6	4	0	3
134	Teashirt homolog 3 OS=Homo sapiens OX=9606 GN=TSHZ3 PE=1 SV=2	Q63HK5	TSHZ3	119 kDa	NA	0.68078	4.91583	6.4806	1	1	1.78655e-07	3.35313e-08	0	0	0	2945500	1786400	2667200	4890300	3247900	3559200	0	0	0	5	5	6	5	3	3
135	40S ribosomal protein S13 OS=Homo sapiens OX=9606 GN=RPS13 PE=1 SV=2	P62277	RPS13	17 kDa	NA	7.55651	7.51687	8.0079	0	0	0.930491	0.0966409	17800000	15300000	13800000	16500000	12100000	21500000	12600000	9951800	7979400	2	3	3	3	3	3	3	3	3
136	Isoform 2 of Protein SET OS=Homo sapiens OX=9606 GN=SET	Q01105-2	SET	32 kDa	NA	6.1038	2.9758	2.50808	0	0	0.218005	0.0962624	4153000	6560300	5939600	600710	0	3553100	0	0	2464100	6	4	6	2	0	4	0	0	5
137	Proteasome subunit beta type-4 OS=Homo sapiens OX=9606 GN=PSMB4 PE=1 SV=4	P28070	PSMB4	29 kDa	NA	6.59864	7.18396	4.40748	0	0	0.836754	0.200906	7162600	6941900	9583700	13100000	12200000	12600000	3808600	3109200	0	4	5	4	4	5	3	2	2	0
138	60S ribosomal protein L23 OS=Homo sapiens OX=9606 GN=RPL23 PE=1 SV=1	P62829	RPL23	15 kDa	NA	7.89577	5.43523	8.50007	0	0	0.378353	0.777386	20400000	14800000	26500000	27400000	0	18500000	21200000	8950800	13500000	2	2	3	4	0	6	2	3	2
139	Plasminogen activator inhibitor 1 RNA-binding protein OS=Homo sapiens OX=9606 GN=SERBP1 PE=1 SV=2	Q8NC51 (+1)	SERBP1	45 kDa	NA	3.4344	2.73378	3.9918	0	0	0.247068	0.245926	732770	665740	1013600	302170	394920	1002100	703100	834340	865570	3	3	4	2	2	4	3	6	4
140	Cluster of 40S ribosomal protein S6 OS=Homo sapiens OX=9606 GN=RPS6 PE=1 SV=1 (P62753)	P62753	RPS6	29 kDa	TRUE	6.40757	6.33783	4.75435	0	0	0.978138	0.360771	7171800	6029200	7228100	6479300	5332800	9314300	8533300	2796300	0	3	3	4	3	3	4	2	2	0
141	Cluster of 26S proteasome non-ATPase regulatory subunit 8 OS=Homo sapiens OX=9606 GN=PSMD8 PE=1 SV=2 (P48556)	P48556 [2]	PSMD8	40 kDa	TRUE	5.43919	6.01756	0.786099	0	-1	0.166178	1.90794e-06	3197900	2518200	4801100	3738300	6075200	6881900	0	0	0	3	2	3	3	5	6	0	0	0
142	DNA replication licensing factor MCM7 OS=Homo sapiens OX=9606 GN=MCM7 PE=1 SV=4	P33993	MCM7	81 kDa	NA	5.36015	0.673094	0.786099	-1	-1	2.6473e-08	3.35313e-08	3303400	3019100	3213800	0	0	0	0	0	0	9	6	8	0	0	0	0	0	0
143	40S ribosomal protein S10 OS=Homo sapiens OX=9606 GN=RPS10 PE=1 SV=1	P46783	RPS10	19 kDa	NA	5.54145	5.81604	5.90636	0	0	0.674937	0.432677	3561600	4078300	3254200	4451400	2455700	9723000	4538400	2482700	1748100	2	3	2	3	2	3	4	3	3
144	Reticulocalbin-1 OS=Homo sapiens OX=9606 GN=RCN1 PE=1 SV=1	Q15293 (+1)	RCN1	39 kDa	NA	0.68078	6.88717	0.786099	1	0	5.31169e-08	0.655083	0	0	0	7222600	9820200	15100000	0	0	0	0	0	0	8	7	6	0	0	0
145	Cluster of Histone H2B type 1-K OS=Homo sapiens OX=9606 GN=HIST1H2BK PE=1 SV=3 (O60814)	O60814 [15]	HIST1H2BK	14 kDa	TRUE	6.86498	0.673094	0.786099	-1	-1	8.01228e-07	8.62946e-07	14700000	5994800	9550000	0	0	0	0	0	0	4	3	5	0	0	0	0	0	0
146	40S ribosomal protein S14 (Fragment) OS=Homo sapiens OX=9606 GN=RPS14 PE=1 SV=1	A0A2R8Y811 (+1)	RPS14	16 kDa	NA	6.05764	6.53284	6.72758	0	1	0.0722651	0.0129631	5640000	4093600	6367000	8347800	6366200	9207400	5367200	3978300	4192500	3	3	4	4	3	4	4	4	3
147	Cluster of DNA helicase OS=Homo sapiens OX=9606 GN=MCM4 PE=1 SV=1 (A0A3B3IU45)	A0A3B3IU45 [2]	MCM4	91 kDa	TRUE	5.00367	0.673094	0.786099	-1	-1	1.85729e-07	2.13536e-07	2642300	2604900	2132000	0	0	0	0	0	0	12	10	11	0	0	0	0	0	0
148	Heterogeneous nuclear ribonucleoprotein K OS=Homo sapiens OX=9606 GN=HNRNPK PE=1 SV=1	P61978 (+2)	HNRNPK	51 kDa	NA	0.68078	4.84674	2.06499	1	0	0.0127929	0.245926	0	0	0	2976200	1946600	2046700	1374200	0	0	0	0	0	10	6	3	4	0	0
149	Peflin OS=Homo sapiens OX=9606 GN=PEF1 PE=1 SV=1	Q9UBV8	PEF1	30 kDa	NA	4.7038	4.6103	5.48183	0	0	0.927827	0.155138	2771100	1389600	1999900	2650700	1393500	1934100	2857800	2728000	1121600	5	3	3	4	3	3	5	3	3
150	Cluster of 60S ribosomal protein L13a OS=Homo sapiens OX=9606 GN=RPL13A PE=1 SV=2 (P40429)	P40429	RPL13A	24 kDa	TRUE	6.55715	6.30358	7.12878	0	0	0.479935	0.0715017	8433700	7578500	6710600	5736200	5685400	9121100	8416100	5710800	4035000	2	2	2	4	3	3	3	2	4
151	60S ribosomal protein L23a (Fragment) OS=Homo sapiens OX=9606 GN=RPL23A PE=1 SV=1	K7EJV9	RPL23A	19 kDa	NA	6.15307	5.82561	6.62497	0	0	0.307827	0.0823534	5383500	5935100	5611100	4394700	4008900	5881100	4568100	3471100	4612200	3	2	4	3	3	4	3	4	4
152	60S ribosomal protein L13 OS=Homo sapiens OX=9606 GN=RPL13 PE=1 SV=4	P26373	RPL13	24 kDa	NA	6.14742	6.102	7.02456	0	1	0.904803	0.00356109	4767400	6096600	6119600	5251200	5487900	6534900	6576000	5111500	4665900	4	2	5	4	2	3	4	3	4
154	40S ribosomal protein S25 OS=Homo sapiens OX=9606 GN=RPS25 PE=1 SV=1	P62851	RPS25	14 kDa	NA	6.43118	6.28207	6.9908	0	0	0.651967	0.0511917	6810000	6821300	7070300	7030000	4904700	8237500	5528300	5887900	4469400	4	3	3	3	3	3	3	2	2
155	Zinc finger protein ZFPM2 OS=Homo sapiens OX=9606 GN=ZFPM2 PE=1 SV=3	Q8WW38	ZFPM2	128 kDa	NA	0.68078	4.2237	1.99605	1	0	0.026147	0.259734	0	0	0	2305000	1386400	923120	1197700	0	0	0	0	0	7	3	4	5	0	0
156	60S ribosomal protein L30 (Fragment) OS=Homo sapiens OX=9606 GN=RPL30 PE=1 SV=1	E5RI99 (+1)	RPL30	13 kDa	NA	6.67042	6.40765	7.45418	0	1	0.331882	0.00921297	8256800	6615000	10200000	7269800	4792200	10900000	9247600	6426400	5955900	3	3	3	2	2	3	2	2	2
157	Cluster of 60S ribosomal protein L9 OS=Homo sapiens OX=9606 GN=RPL9 PE=1 SV=1 (P32969)	P32969	RPL9	22 kDa	TRUE	5.48227	5.81248	6.70853	0	1	0.525753	0.0205123	3281700	2597100	4982700	4222900	2914500	8445900	5606200	2970500	5196900	2	2	3	3	2	4	2	3	2
158	Proteasome subunit alpha type OS=Homo sapiens OX=9606 GN=PSMA2 PE=1 SV=1	A0A024RA52 (+1)	PSMA2	26 kDa	NA	4.28685	6.72212	0.786099	0	0	0.258386	0.0675751	0	6271500	4909000	8398400	9805500	8812700	0	0	0	0	2	4	3	3	4	0	0	0
160	60S ribosomal protein L24 OS=Homo sapiens OX=9606 GN=RPL24 PE=1 SV=1	C9JNW5 (+2)	RPL24	18 kDa	NA	6.16896	7.79286	6.64118	1	0	0.0124628	0.297879	9376700	3703700	5323900	23000000	13500000	25400000	5654100	3013200	4497800	2	2	4	5	4	5	3	2	3
161	Exportin-2 OS=Homo sapiens OX=9606 GN=CSE1L PE=1 SV=3	P55060 (+1)	CSE1L	110 kDa	NA	4.94847	1.88005	2.47243	0	0	0.202883	0.205913	2158600	2329000	2618900	0	0	1741000	0	2381900	0	3	7	10	0	0	4	0	2	0
162	Cluster of 14-3-3 protein epsilon OS=Homo sapiens OX=9606 GN=YWHAE PE=1 SV=1 (P62258)	P62258 [2]	YWHAE	29 kDa	TRUE	4.94129	3.19671	1.86754	0	0	0.376011	0.0747578	3251900	1494100	2669200	2268900	0	1457100	926960	0	0	3	3	4	2	0	3	1	0	0
164	Proteasome subunit beta type-7 OS=Homo sapiens OX=9606 GN=PSMB7 PE=1 SV=1	Q99436	PSMB7	30 kDa	NA	5.72891	6.16737	5.19837	0	0	0.152969	0.0567884	4212800	3492600	4886800	6356800	5565100	6118200	1829700	1491800	1828300	3	3	3	4	3	3	3	2	2
165	60S ribosomal protein L27 OS=Homo sapiens OX=9606 GN=RPL27 PE=1 SV=2	P61353	RPL27	16 kDa	NA	5.19251	5.95103	6.68827	0	1	0.302455	0.0309326	3251000	1948800	3550200	5435400	2467600	10700000	4283800	3243100	5869800	2	2	3	3	3	2	2	3	2
167	Cluster of Coiled-coil-helix-coiled-coil-helix domain-containing protein 2 OS=Homo sapiens OX=9606 GN=CHCHD2 PE=1 SV=1 (Q9Y6H1)	Q9Y6H1	CHCHD2	16 kDa	TRUE	5.98499	2.18415	9.25121	-1	1	0.0421832	0.0486584	3664000	4585600	7552800	2933200	0	1.058	29100000	17700000	20200000	2	2	3	2	0	2	3	3	3
168	Cluster of Protein arginine N-methyltransferase 5 OS=Homo sapiens OX=9606 GN=PRMT5 PE=1 SV=4 (O14744)	O14744	PRMT5	73 kDa	TRUE	0.68078	0.673094	5.8347	0	1	0.978459	7.2078e-07	0	0	0	0	0	0	3157500	1709400	3091700	0	0	0	0	0	0	9	4	3
169	CAD protein OS=Homo sapiens OX=9606 GN=CAD PE=1 SV=3	P27708	CAD	243 kDa	NA	3.00214	3.62228	2.21784	0	0	0.763216	0.561784	348330	483580	1173000	1356700	523880	1172800	1863900	0	0	3	2	3	4	4	4	3	0	0
170	A-kinase anchor protein 8-like OS=Homo sapiens OX=9606 GN=AKAP8L PE=1 SV=4	Q9ULX6	AKAP8L	72 kDa	NA	0.68078	5.42548	1.86902	1	0	0.00249764	0.242413	0	0	0	2906600	3326200	4432300	929710	0	0	0	0	0	3	4	7	3	0	0
171	Ribosomal protein L19 OS=Homo sapiens OX=9606 GN=RPL19 PE=1 SV=1	J3KTE4 (+2)	RPL19	23 kDa	NA	6.03725	6.00412	7.22605	0	1	0.930491	0.000772744	5451200	4130800	6244200	5290800	4374200	6635300	6831200	5645900	5893200	3	3	3	3	3	3	3	3	3
172	60S ribosomal protein L36a OS=Homo sapiens OX=9606 GN=RPL36A PE=1 SV=1	J3KQN4 (+1)	RPL36A	16 kDa	NA	2.72158	3.79349	3.79848	0	0	0.412079	0.294261	1064100	0	938290	1618200	564700	1331600	999580	688590	534040	2	0	2	3	3	2	2	3	3
173	Trifunctional purine biosynthetic protein adenosine-3 OS=Homo sapiens OX=9606 GN=GART PE=1 SV=1	P22102	GART	108 kDa	NA	4.98207	3.09927	3.99161	0	0	0.417851	0.576073	2271700	2596700	2388100	1476500	0	1830400	3156700	1721000	0	4	2	3	3	0	2	4	2	0
174	Proteasome subunit beta type-6 OS=Homo sapiens OX=9606 GN=PSMB6 PE=1 SV=4	P28072	PSMB6	25 kDa	NA	6.11881	6.39488	5.45964	0	-1	0.437985	0.0457703	5378200	4082000	7699500	8323500	5927700	7264200	2341200	1659500	2113700	3	2	2	3	2	2	2	3	3
175	60S ribosomal protein L38 OS=Homo sapiens OX=9606 GN=RPL38 PE=1 SV=2	P63173	RPL38	8 kDa	NA	1.9529	7.16287	4.26481	1	0	0.0458072	0.245926	0	0	1859400	12700000	8352800	18800000	3004200	2976700	0	0	0	2	4	3	2	2	2	0
176	Proteasome subunit beta type-3 OS=Homo sapiens OX=9606 GN=PSMB3 PE=1 SV=2	P49720	PSMB3	23 kDa	NA	4.30221	5.99466	3.75901	0	0	0.538878	0.795768	0	5420900	5919400	3563200	9793800	4063500	2657500	0	1282700	0	2	2	2	3	2	2	0	2
177	Calnexin OS=Homo sapiens OX=9606 GN=CANX PE=1 SV=2	P27824 (+1)	CANX	68 kDa	NA	3.65204	2.51224	0.786099	0	-1	0.427242	0.0375747	279960	1439000	2020900	0	759840	872590	0	0	0	2	4	9	0	2	4	0	0	0
178	60S ribosomal protein L28 OS=Homo sapiens OX=9606 GN=RPL28 PE=1 SV=3	P46779	RPL28	16 kDa	NA	0.68078	3.53301	4.93157	0	1	0.0930947	0.0140918	0	0	0	2884300	0	2459200	1961100	1587000	993280	0	0	0	2	0	3	3	2	2
179	40S ribosomal protein S15 OS=Homo sapiens OX=9606 GN=RPS15 PE=1 SV=1	A0A0B4J2B4	RPS15	14 kDa	NA	4.42259	3.27559	4.87077	0	0	0.448742	0.698812	1455500	1784300	1610000	1793500	0	2240100	1774200	1119200	1376800	3	3	2	2	0	2	2	2	2
180	40S ribosomal protein S19 OS=Homo sapiens OX=9606 GN=RPS19 PE=1 SV=2	P39019	RPS19	16 kDa	NA	5.87081	5.64622	6.41761	0	0	0.603919	0.118642	4747100	3850700	5350300	4412900	2507800	6478600	3736600	4341800	3043800	2	2	2	2	2	3	2	3	2
181	Cytochrome c oxidase copper chaperone OS=Homo sapiens OX=9606 GN=COX17 PE=1 SV=1	C9J8T6 (+1)	COX17	11 kDa	NA	6.81997	6.86118	7.93739	0	1	0.930491	0.00387185	9948400	7802500	9866800	11300000	8208900	10800000	12100000	10400000	6971900	2	2	2	2	2	2	2	2	2
183	Cluster of Isoform 2 of Plastin-3 OS=Homo sapiens OX=9606 GN=PLS3 (P13797-2)	P13797-2	PLS3	69 kDa	TRUE	3.48755	3.70519	3.18642	0	0	0.947722	0.848815	2427700	0	2199800	1156500	736280	1156400	1571800	744930	0	2	0	2	4	2	3	7	2	0
185	26S proteasome non-ATPase regulatory subunit 14 OS=Homo sapiens OX=9606 GN=PSMD14 PE=1 SV=1	O00487	PSMD14	35 kDa	NA	4.39217	6.28481	0.786099	0	0	0.382802	0.0672794	7352300	0	5228400	5685300	6410100	7728200	0	0	0	2	0	2	4	2	3	0	0	0
188	Cluster of Serine/threonine-protein phosphatase 2A 55 kDa regulatory subunit B alpha isoform OS=Homo sapiens OX=9606 GN=PPP2R2A PE=1 SV=1 (P63151)	P63151	PPP2R2A	52 kDa	TRUE	4.89866	0.673094	5.82375	-1	1	1.55805e-06	0.0139886	2052800	2896400	1964700	0	0	0	3520000	2556900	1842200	2	2	2	0	0	0	6	6	4
191	Leucine-rich repeat-containing protein 59 OS=Homo sapiens OX=9606 GN=LRRC59 PE=1 SV=1	Q96AG4	LRRC59	35 kDa	NA	6.20375	2.21114	0.786099	-1	-1	0.0337965	0.00697114	4572500	6483700	6801200	0	0	3739400	0	0	0	3	5	5	0	0	2	0	0	0
192	60S ribosomal protein L27a OS=Homo sapiens OX=9606 GN=RPL27A PE=1 SV=1	E9PJD9 (+2)	RPL27A	10 kDa	NA	6.53888	6.46317	7.46567	0	1	0.895725	0.017155	7831800	6681800	7943500	7500200	6110500	9180700	7606800	5480200	8510200	2	3	2	2	2	2	3	3	2
194	60S ribosomal protein L22 OS=Homo sapiens OX=9606 GN=RPL22 PE=1 SV=2	P35268	RPL22	15 kDa	NA	6.45682	6.24141	5.01009	0	0	0.947722	0.451131	5618200	7328800	8500000	6851500	3433700	11400000	0	5723800	4565100	2	2	2	2	2	3	0	2	3
196	Cluster of Aldehyde dehydrogenase family 3 member A2 OS=Homo sapiens OX=9606 GN=ALDH3A2 PE=1 SV=1 (J3QRD1)	J3QRD1 [3]	ALDH3A2	45 kDa	TRUE	5.55641	0.673094	0.786099	-1	-1	5.31169e-08	6.75906e-08	3125200	3060600	5214400	0	0	0	0	0	0	4	4	6	0	0	0	0	0	0
197	Isoform 2 of 5'-nucleotidase domain-containing protein 2 OS=Homo sapiens OX=9606 GN=NT5DC2	Q9H857-2	NT5DC2	64 kDa	NA	3.10473	2.73107	4.08916	0	0	0.895725	0.491243	1361000	1508200	0	931880	0	1270900	1352300	727190	651750	2	2	0	2	0	3	4	2	2
198	Isoform 2 of Isochorismatase domain-containing protein 2 OS=Homo sapiens OX=9606 GN=ISOC2	Q96AB3-2	ISOC2	24 kDa	NA	4.14309	6.39071	7.17543	0	0	0.280713	0.0857899	3414300	0	6689000	9560600	4704400	8013300	8863200	5168600	4624800	3	0	2	2	2	2	2	2	2
200	40S ribosomal protein S20 OS=Homo sapiens OX=9606 GN=RPS20 PE=1 SV=1	P60866 (+1)	RPS20	13 kDa	NA	6.21977	4.14659	4.7046	0	0	0.494134	0.509964	5746200	6638700	5411400	5417300	0	5216500	5374600	3908100	0	2	2	2	2	0	2	2	2	0
201	60S acidic ribosomal protein P1 OS=Homo sapiens OX=9606 GN=RPLP1 PE=1 SV=1	P05386	RPLP1	12 kDa	TRUE	0.68078	5.63744	9.55842	0	1	0.0920169	0.00669047	0	0	0	0	19400000	33800000	31400000	24700000	23700000	0	0	0	0	1	1	1	1	1
202	Cluster of 60S ribosomal protein L37a OS=Homo sapiens OX=9606 GN=RPL37A PE=1 SV=1 (C9J4Z3)	C9J4Z3 [2]	RPL37A	8 kDa	TRUE	2.38965	4.13402	4.19341	0	0	0.114608	0.0672794	615400	722870	0	1077700	1283500	1821000	779010	832100	1140700	2	2	0	2	3	3	3	2	3
204	Histone H2A OS=Homo sapiens OX=9606 GN=hCG_2039566 PE=3 SV=1	A0A0U1RR32 (+11)	hCG_2039566	18 kDa	TRUE	6.87707	0.673094	0.786099	-1	-1	8.02941e-09	9.19551e-09	9667400	8108700	11100000	0	0	0	0	0	0	2	2	2	0	0	0	0	0	0
205	Cluster of DnaJ homolog subfamily B member 6 OS=Homo sapiens OX=9606 GN=DNAJB6 PE=1 SV=2 (O75190)	O75190	DNAJB6	36 kDa	TRUE	0.68078	5.32944	2.91512	1	0	0.00288644	0.0539653	0	0	0	3891300	2873400	3065600	1076400	641350	0	0	0	0	6	3	3	2	2	0
209	40S ribosomal protein S15a OS=Homo sapiens OX=9606 GN=RPS15A PE=1 SV=2	P62244	RPS15A	15 kDa	NA	6.19385	4.416	2.66212	0	0	0.558293	0.156239	6087000	5567200	5779800	6481900	0	8041800	4520300	0	0	2	2	2	2	0	3	2	0	0
210	Tripeptidyl-peptidase 1 (Fragment) OS=Homo sapiens OX=9606 GN=TPP1 PE=1 SV=1	A0A2R8Y7U1 (+3)	TPP1	44 kDa	NA	6.4042	0.673094	0.786099	-1	-1	9.77154e-08	1.13086e-07	7731600	7061200	5618100	0	0	0	0	0	0	2	2	2	0	0	0	0	0	0
212	T-complex protein 1 subunit alpha OS=Homo sapiens OX=9606 GN=TCP1 PE=1 SV=1	P17987	TCP1	60 kDa	NA	0.68078	3.7564	1.68805	1	0	0.0121129	0.245926	0	0	0	1448500	673800	1131500	648080	0	0	0	0	0	4	3	4	3	0	0
214	Cluster of Ras-related protein Rab-1B OS=Homo sapiens OX=9606 GN=RAB1B PE=1 SV=1 (E9PLD0)	E9PLD0 [4]	RAB1B	18 kDa	TRUE	4.06799	0.673094	0.786099	-1	-1	1.23217e-06	1.51246e-06	980200	1115100	1801300	0	0	0	0	0	0	2	3	4	0	0	0	0	0	0
216	Cluster of Heat shock protein 105 kDa OS=Homo sapiens OX=9606 GN=HSPH1 PE=1 SV=1 (Q92598)	Q92598 [3]	HSPH1	97 kDa	TRUE	0.68078	3.1937	1.66279	1	0	0.0285682	0.249648	0	0	0	881340	497240	727650	0	0	529060	0	0	0	2	2	2	0	0	2
218	Transcription intermediary factor 1-beta OS=Homo sapiens OX=9606 GN=TRIM28 PE=1 SV=5	Q13263 (+1)	TRIM28	89 kDa	NA	0.68078	4.71004	1.13371	1	0	0.00329876	0.595867	0	0	0	3051300	4123700	637450	214570	0	0	0	0	0	2	2	2	2	0	0
219	40S ribosomal protein S26 OS=Homo sapiens OX=9606 GN=RPS26 PE=1 SV=3	P62854	RPS26	13 kDa	NA	6.8721	2.75412	0.786099	0	-1	0.0920169	0.0140918	9921600	8554000	10100000	0	0	13100000	0	0	0	2	2	2	0	0	2	0	0	0
221	HCLS1-associated protein X-1 OS=Homo sapiens OX=9606 GN=HAX1 PE=1 SV=2	O00165 (+1)	HAX1	32 kDa	NA	0.68078	4.71038	2.30258	1	0	0.0300706	0.245926	0	0	0	1801300	2142600	2283100	2207000	0	0	0	0	0	2	2	2	2	0	0
222	T-complex protein 1 subunit beta OS=Homo sapiens OX=9606 GN=CCT2 PE=1 SV=2	F5GWF6 (+1)	CCT2	57 kDa	NA	2.46892	3.38009	0.786099	0	0	0.382802	0.0718351	0	666950	871790	777400	720250	850230	0	0	0	0	2	2	2	2	2	0	0	0
224	Hsc70-interacting protein (Fragment) OS=Homo sapiens OX=9606 GN=ST13 PE=1 SV=1	H7C3I1 (+1)	ST13	16 kDa	NA	5.59771	1.96816	0.786099	-1	-1	0.0261741	0.00575994	2726000	4674600	4236200	0	0	2133800	0	0	0	2	3	3	0	0	3	0	0	0
225	Dolichyl-diphosphooligosaccharide--protein glycosyltransferase subunit 1 OS=Homo sapiens OX=9606 GN=RPN1 PE=1 SV=1	P04843	RPN1	69 kDa	NA	3.91859	0.673094	0.786099	-1	-1	6.05974e-06	7.27664e-06	843290	956200	1772600	0	0	0	0	0	0	3	4	4	0	0	0	0	0	0
226	Heat shock protein beta-1 OS=Homo sapiens OX=9606 GN=HSPB1 PE=1 SV=2	P04792	HSPB1	23 kDa	NA	0.68078	4.43643	0.786099	1	0	1.18583e-06	0.652784	0	0	0	2217800	1134900	1957600	0	0	0	0	0	0	5	3	4	0	0	0
233	E3 ubiquitin-protein ligase Praja-2 OS=Homo sapiens OX=9606 GN=PJA2 PE=1 SV=4	O43164 (+1)	PJA2	78 kDa	NA	0.68078	4.65883	0.786099	1	0	1.67859e-05	0.777386	0	0	0	1391900	1381400	4308400	0	0	0	0	0	0	4	3	4	0	0	0
257	G-protein coupled receptor-associated sorting protein 2 OS=Homo sapiens OX=9606 GN=GPRASP2 PE=1 SV=1	Q96D09	GPRASP2	94 kDa	NA	0.68078	3.32	0.786099	1	0	9.25301e-06	0.640308	0	0	0	984570	628830	669620	0	0	0	0	0	0	3	2	2	0	0	0
