# Supplementary material for: A specific role for importin-5 and NASP in the import and nuclear hand-off of monomeric H3
Source: eLife. 2022 Sep 6;11:e81755. doi: 10.7554/eLife.81755 (PMC9560165; doi:10.7554/eLife.81755)
Supplement: Figure 3—source data 1. — Total precursor intensity used in Figure 3G. [file elife-81755-fig3-data1.xlsx]

## Sheet: MS_native_gel_bands
Figure 3—Source Data 1. MS data for EGFP_sNASP CoIP native gel bands						ANOVA.Test
	Identified.Proteins..85.	Accession.Number	Alternate.ID	Molecular.Weight	Protein.Grouping.Ambiguity	p_val	Band01_Rep1	Band01_Rep2	Band01_Rep3	Band02_Rep1	Band02_Rep2	Band02_Rep3	Band03_Rep1	Band03_Rep2	Band03_Rep3	Band04_Rep1	Band04_Rep2	Band04_Rep3	Band05_Rep1	Band05_Rep2	Band05_Rep3	Band06_Rep1	Band06_Rep2	Band06_Rep3	Band07_Rep1	Band07_Rep2	Band07_Rep3	Band08_Rep1	Band08_Rep2	Band08_Rep3	Band09_Rep1	Band09_Rep2	Band09_Rep3	Band10_Rep1	Band10_Rep2	Band10_Rep3	Band11_Rep1	Band11_Rep2	Band11_Rep3	Band12_Rep1	Band12_Rep2	Band12_Rep3	B1.1	B1.2	B1.3	B2.1	B2.2	B2.3	B3.1
1	Cluster of Nuclear autoantigenic sperm protein OS=Homo sapiens OX=9606 GN=NASP PE=1 SV=2 (P49321)	P49321 [2]	NASP	85 kDa	TRUE	< 0.00010	29600000	171000000	162000000	303000000	641000000	846000000	1110000000	1000000000	1360000000	137000000	217000000	396000000	153000000	291000000	336000000	46900000	78200000	111000000	85200000	155000000	203000000	109000000	175000000	248000000	60100000	160000000	226000000	105000000	137000000	184000000	29100000	56700000	56600000	1201700	4761700	7703100	10	21	26	33	45	51	55
2	Cluster of Heat shock 70 kDa protein 1A OS=Homo sapiens OX=9606 GN=HSPA1A PE=1 SV=1 (P0DMV8)	P0DMV8 [4]	HSPA1A	70 kDa	TRUE	0.0002	0	0	0	0	80711	123580	0	0	0	0	0	0	0	177680	280260	686480	1756200	1956400	4741700	16000000	24300000	244000000	274000000	375000000	18400000	35800000	42500000	13500000	19800000	24900000	520870	2532300	2478200	0	85725	81067	0	0	0	0	3	4	0
3	Endoplasmic reticulum chaperone BiP OS=Homo sapiens OX=9606 GN=HSPA5 PE=1 SV=2	P11021	HSPA5	72 kDa	TRUE	< 0.00010	0	0	0	0	0	0	0	0	0	432340	219600	85473	5818000	5727700	7036800	2899600	3363300	3004500	13100000	18400000	27800000	2887900	7071600	10800000	570440	3630900	3609700	1878800	1356300	1954700	0	0	0	0	0	0	0	0	0	0	0	0	0
4	Histone H4 OS=Homo sapiens OX=9606 GN=H4-16 PE=1 SV=2	P62805	H4-16	11 kDa	NA	0.00043	370950	0	0	293040	0	0	158350	53308	0	164950	101020	0	219820	501440	497190	2275500	5384800	7327100	29900000	100000000	102000000	10300000	36600000	35200000	30900000	54000000	71200000	56000000	75400000	82900000	1327600	2483300	3892100	95837	126700	341590	8	0	0	5	0	0	4
5	Histone-binding protein RBBP7 OS=Homo sapiens OX=9606 GN=RBBP7 PE=1 SV=1	Q16576	RBBP7	48 kDa	TRUE	0.073	238800	1388800	2064300	1582300	2341100	2449600	1437100	2022300	2130000	908930	1172200	855260	999310	1887700	2494000	1652800	5150700	9651000	15200000	70200000	77200000	5720500	26700000	34200000	16800000	40700000	63200000	46000000	62300000	118000000	968530	3198800	4024900	0	0	110240	3	3	4	4	5	6	5
6	Cluster of Histone H3.3 OS=Homo sapiens OX=9606 GN=H3-3B PE=1 SV=2 (P84243)	P84243 [3]	H3-3B	15 kDa	TRUE	< 0.00010	0	0	0	0	0	0	0	0	0	16600000	27200000	21400000	66300000	70300000	90000000	8728100	21800000	18800000	24600000	46300000	56000000	21400000	35800000	32800000	29000000	36500000	50700000	39600000	55800000	62500000	4699100	7036100	7326300	0	0	0	0	0	0	0	0	0	0
7	Histone-binding protein RBBP4 OS=Homo sapiens OX=9606 GN=RBBP4 PE=1 SV=3	Q09028	RBBP4	48 kDa	TRUE	0.055	185770	961960	1707000	2238300	3407700	3199000	2134100	2976800	3084300	944060	1241100	1011900	1096000	1995000	2749900	2178400	5865900	12000000	24900000	91000000	112000000	5794200	11600000	24700000	16700000	33000000	49200000	30700000	45200000	77100000	628020	2425900	4158300	0	0	0	2	2	3	3	4	4	3
8	Cluster of Keratin, type II cytoskeletal 1 OS=Homo sapiens OX=9606 GN=KRT1 PE=1 SV=6 (P04264)	P04264 [10]	KRT1	66 kDa	TRUE	0.59	139090	957350	2299000	956290	3864700	416280	376200	78146	1222600	361580	787360	117520	235530	85274	685900	3589500	327440	618300	1969300	128840	474880	4450400	0	995400	517970	0	109930	687590	0	0	0	0	538690	573610	85370	0	7	10	26	19	46	12	10
9	Histone acetyltransferase type B catalytic subunit OS=Homo sapiens OX=9606 GN=HAT1 PE=1 SV=1	O14929	HAT1	50 kDa	NA	0.46	0	0	0	0	0	0	0	0	0	0	0	0	0	0	0	0	619580	0	1497200	5381500	6023400	2889600	14600000	18400000	7390800	16100000	22300000	31900000	54100000	74100000	587460	1569600	1428200	0	0	0	0	0	0	0	0	0	0
10	Cluster of Heat shock cognate 71 kDa protein OS=Homo sapiens OX=9606 GN=HSPA8 PE=1 SV=1 (P11142)	P11142 [2]	HSPA8	71 kDa	TRUE	0.023	0	0	0	0	0	0	0	0	0	0	0	0	0	0	0	0	385230	417350	1625600	6622500	11500000	30500000	25700000	27200000	3652100	8178600	9295800	2402300	4720400	5166200	0	444390	0	0	0	0	0	0	0	0	0	0	0
11	Histone deacetylase 6 OS=Homo sapiens OX=9606 GN=HDAC6 PE=1 SV=2	Q9UBN7	HDAC6	131 kDa	NA	0.46	0	0	0	0	0	0	0	0	0	0	0	0	0	0	0	0	0	97027	229250	813090	1404600	3393800	3872800	4535600	1034300	2627000	4788000	2711300	1474200	4118900	155980	388480	99549	0	0	0	0	0	0	0	0	0	0
12	Cluster of Keratin, type I cytoskeletal 10 OS=Homo sapiens OX=9606 GN=KRT10 PE=1 SV=6 (P13645)	P13645 [7]	KRT10	59 kDa	TRUE	0.44	237040	194960	1079100	419890	2063100	226340	131220	124420	203340	0	300580	0	147570	96702	473970	943870	81304	322720	606920	126910	210040	1847600	0	151320	265720	70512	94580	154360	54666	53447	0	0	0	143680	0	0	4	3	14	9	16	6	3
13	Protein downstream neighbor of Son OS=Homo sapiens OX=9606 GN=DONSON PE=1 SV=2	Q9NYP3	DONSON	63 kDa	NA	1	0	0	0	0	0	0	0	0	0	0	0	0	0	0	0	0	0	0	0	0	0	275600	249580	198170	95627	406180	566000	2779900	10500000	9428500	295310	7529400	9322000	0	43591	194470	0	0	0	0	0	0	0
14	Putative E3 ubiquitin-protein ligase UBR7 OS=Homo sapiens OX=9606 GN=UBR7 PE=1 SV=2	Q8N806	UBR7	48 kDa	NA	0.005	0	0	0	78221	591620	634900	312020	875760	1066800	720840	1334400	1141400	1762000	5456200	7509100	760810	2128800	1079500	333080	919760	1112500	0	0	120490	0	0	0	0	0	0	0	0	0	0	0	0	0	0	0	3	8	9	7
15	Cluster of Actin, cytoplasmic 2 OS=Homo sapiens OX=9606 GN=ACTG1 PE=1 SV=1 (P63261)	P63261 [3]	ACTG1	42 kDa	TRUE	0.056	0	0	0	757010	1689900	5270600	267240	840020	2214500	0	122310	0	0	0	0	0	0	0	0	0	0	0	0	0	0	0	0	0	0	49643	0	0	0	0	0	0	0	0	0	9	14	21	4
16	Keratin, type I cytoskeletal 9 OS=Homo sapiens OX=9606 GN=KRT9 PE=1 SV=3	P35527	KRT9	62 kDa	TRUE	0.67	0	300380	284260	295590	791140	0	150600	0	3189000	223620	253780	0	0	0	349020	1098600	241400	0	919650	152140	127800	1191800	0	152020	0	0	0	181840	0	0	0	0	267610	150610	0	0	0	5	3	4	11	0	4
17	Cluster of Ubiquitin-40S ribosomal protein S27a OS=Homo sapiens OX=9606 GN=RPS27A PE=1 SV=2 (P62979)	P62979	RPS27A	18 kDa	TRUE	0.14	0	0	0	0	0	248010	0	1002500	1055900	397070	682860	186070	0	627890	1024900	0	239390	0	0	866140	726720	0	640580	542780	0	183440	650980	0	260460	429090	0	0	0	0	0	0	0	0	0	0	0	4	0
18	CON__P00761	CON__P00761	CON__P00761	?	NA	0.0068	0	0	0	7035200	4077700	3306600	6530100	6239100	0	12000000	8597900	7121100	10700000	11900000	5526700	0	0	5751300	0	6205300	5762800	7074600	7913700	7897100	9659300	5696500	5881200	0	6576900	5278300	0	5125500	5671300	0	0	0	0	0	0	3	3	3	4
19	Histone chaperone ASF1B OS=Homo sapiens OX=9606 GN=ASF1B PE=1 SV=1	Q9NVP2	ASF1B	22 kDa	TRUE	0.2	0	0	0	1029500	215390	0	2090700	1138800	0	753470	0	0	0	574800	0	0	0	0	8184400	15700000	18900000	1470500	3135000	3413300	3627000	0	7829200	3013000	5379900	5417500	0	0	0	0	0	0	0	0	0	3	2	0	3
20	Cluster of Heat shock protein HSP 90-beta OS=Homo sapiens OX=9606 GN=HSP90AB1 PE=1 SV=4 (P08238)	P08238 [2]	HSP90AB1	83 kDa	TRUE	1	0	0	0	0	0	0	0	0	0	0	0	0	0	0	0	0	0	0	122710	157290	249280	0	1044000	2946300	0	0	0	0	0	0	0	0	0	0	0	0	0	0	0	0	0	0	0
21	Histone chaperone ASF1A OS=Homo sapiens OX=9606 GN=ASF1A PE=1 SV=1	Q9Y294	ASF1A	23 kDa	TRUE	0.52	0	0	0	0	0	0	371870	0	0	0	0	0	0	0	0	1111100	0	0	6414900	11000000	11700000	1028700	2135900	2168500	2401800	4507700	6451300	2506800	3562200	4150400	0	0	0	0	0	0	0	0	0	0	0	0	3
22	Heat shock 70 kDa protein 4L OS=Homo sapiens OX=9606 GN=HSPA4L PE=1 SV=3	O95757	HSPA4L	95 kDa	TRUE	1	0	0	0	0	0	0	0	0	0	0	0	0	0	0	0	0	0	0	0	0	0	0	0	0	494760	516380	955160	498730	1441200	1622500	0	0	0	0	0	0	0	0	0	0	0	0	0
23	Importin subunit alpha-1 OS=Homo sapiens OX=9606 GN=KPNA2 PE=1 SV=1	P52292	KPNA2	58 kDa	NA	0.46	0	0	0	0	0	0	0	0	0	0	0	0	0	0	0	0	0	155460	58132	187050	523240	0	230900	350630	56673	245880	473330	555670	1051800	2954800	0	399110	895460	0	0	0	0	0	0	0	0	0	0
24	Heat shock 70 kDa protein 4 OS=Homo sapiens OX=9606 GN=HSPA4 PE=1 SV=4	P34932	HSPA4	94 kDa	TRUE	1	0	0	0	0	0	0	0	0	0	0	0	0	0	0	0	0	0	0	0	0	0	487830	101740	63182	1317900	1738300	2483000	0	0	0	0	0	0	0	0	0	0	0	0	0	0	0	0
25	Heat shock protein 105 kDa OS=Homo sapiens OX=9606 GN=HSPH1 PE=1 SV=1	Q92598	HSPH1	97 kDa	TRUE	1	0	0	0	0	0	0	0	0	0	0	0	0	0	0	0	0	0	0	0	0	0	0	0	0	405230	716930	1110300	0	94706	68971	0	0	0	0	0	0	0	0	0	0	0	0	0
26	Importin subunit beta-1 OS=Homo sapiens OX=9606 GN=KPNB1 PE=1 SV=2	Q14974	KPNB1	97 kDa	NA	1	0	0	0	0	0	0	0	0	0	0	0	0	0	0	0	0	0	0	0	0	0	0	0	62619	0	89101	236180	0	407200	840490	0	507810	987500	0	0	0	0	0	0	0	0	0	0
27	Cluster of Importin subunit alpha-5 OS=Homo sapiens OX=9606 GN=KPNA1 PE=1 SV=3 (P52294)	P52294 [2]	KPNA1	60 kDa	TRUE	1	0	0	0	0	0	0	0	0	0	0	0	0	0	0	0	0	0	0	0	0	0	121590	0	0	174260	222860	457040	0	250900	537960	0	0	0	0	0	0	0	0	0	0	0	0	0
28	Stress-70 protein, mitochondrial OS=Homo sapiens OX=9606 GN=HSPA9 PE=1 SV=2	P38646	HSPA9	74 kDa	NA	1	0	0	0	0	0	0	0	0	0	0	0	0	0	0	0	0	0	0	0	0	0	287400	206620	192780	60167	83408	135280	38585	45069	0	0	0	0	0	0	0	0	0	0	0	0	0	0
29	Crk-like protein OS=Homo sapiens OX=9606 GN=CRKL PE=1 SV=1	P46109	CRKL	34 kDa	NA	1	0	0	0	0	0	0	0	0	0	0	0	0	0	0	0	0	0	0	0	0	0	531360	292410	334260	196060	0	113430	330110	88639	0	0	0	0	0	0	0	0	0	0	0	0	0	0
30	Cluster of Heterogeneous nuclear ribonucleoprotein A1 OS=Homo sapiens OX=9606 GN=HNRNPA1 PE=1 SV=5 (P09651)	P09651	HNRNPA1	39 kDa	TRUE	0.57	350140	0	0	332880	0	0	0	0	0	0	0	0	0	0	0	0	0	0	0	0	0	0	0	0	0	0	0	0	0	0	0	0	0	0	0	0	6	0	0	5	0	0	0
31	Parkinson disease protein 7 OS=Homo sapiens OX=9606 GN=PARK7 PE=1 SV=2	Q99497	PARK7	20 kDa	NA	1	0	0	0	0	0	0	0	0	0	0	0	0	0	0	0	0	0	0	0	0	0	0	0	93111	387510	542280	606980	0	0	0	0	0	0	0	0	0	0	0	0	0	0	0	0
32	Cluster of Plastin-3 OS=Homo sapiens OX=9606 GN=PLS3 PE=1 SV=4 (P13797)	P13797	PLS3	71 kDa	TRUE	1	0	0	0	0	0	0	0	0	0	0	0	0	0	0	0	0	0	0	0	0	0	152710	599150	502250	0	0	0	0	0	0	0	0	0	0	0	0	0	0	0	0	0	0	0
33	Hornerin OS=Homo sapiens OX=9606 GN=HRNR PE=1 SV=2	Q86YZ3 (+1)	HRNR	282 kDa	NA	0.46	0	0	0	0	0	0	0	0	205090	0	0	0	0	0	0	0	0	0	0	0	0	102470	0	0	0	0	0	0	0	0	0	0	0	0	0	0	0	0	0	0	0	0	0
34	Cluster of CON__P05784	CON__P05784	CON__P05784	?	TRUE	0.61	186850	0	0	62148	0	0	0	0	0	71687	0	0	0	0	0	0	0	0	0	0	0	0	0	0	0	0	0	0	0	0	0	0	0	0	0	0	6	0	0	3	0	0	0
35	L-lactate dehydrogenase B chain OS=Homo sapiens OX=9606 GN=LDHB PE=1 SV=2	P07195	LDHB	37 kDa	NA	0.023	0	0	0	0	0	0	0	0	0	0	0	0	0	0	0	91391	98268	0	0	0	58937	0	160940	176090	0	0	0	0	0	0	0	0	0	0	0	0	0	0	0	0	0	0	0
36	Elongation factor 1-gamma OS=Homo sapiens OX=9606 GN=EEF1G PE=1 SV=3	P26641	EEF1G	50 kDa	NA	1	0	0	0	0	0	0	0	0	0	0	0	0	0	0	0	0	0	0	0	80486	149200	0	0	0	0	35160	38732	0	72256	94038	0	0	0	0	0	0	0	0	0	0	0	0	0
37	Importin subunit alpha-4 OS=Homo sapiens OX=9606 GN=KPNA3 PE=1 SV=2	O00505	KPNA3	58 kDa	TRUE	0.076	0	0	0	0	0	0	0	0	0	0	0	0	0	145310	344420	0	0	0	0	0	0	0	0	62419	0	0	0	0	0	0	0	0	0	0	0	0	0	0	0	0	0	0	0
38	Heterogeneous nuclear ribonucleoproteins A2/B1 OS=Homo sapiens OX=9606 GN=HNRNPA2B1 PE=1 SV=2	P22626	HNRNPA2B1	37 kDa	NA	0.55	250010	0	0	137310	0	0	0	0	0	0	0	0	0	0	0	0	0	0	0	0	0	0	0	0	0	0	0	0	0	0	0	0	0	0	0	0	4	0	0	3	0	0	0
40	Ubiquitin carboxyl-terminal hydrolase 7 OS=Homo sapiens OX=9606 GN=USP7 PE=1 SV=2	Q93009	USP7	128 kDa	NA	1	0	0	0	0	0	0	0	0	0	0	0	0	0	0	0	0	0	0	0	0	0	0	0	0	0	107460	94831	0	86618	178530	0	0	0	0	0	0	0	0	0	0	0	0	0
43	Protein disulfide-isomerase A3 OS=Homo sapiens OX=9606 GN=PDIA3 PE=1 SV=4	P30101	PDIA3	57 kDa	NA	1	0	0	0	0	0	0	0	0	0	0	0	0	0	0	0	0	0	0	0	0	0	161910	0	93095	0	0	0	0	0	0	0	0	0	0	0	0	0	0	0	0	0	0	0
44	Importin subunit alpha-3 OS=Homo sapiens OX=9606 GN=KPNA4 PE=1 SV=1	O00629	KPNA4	58 kDa	TRUE	0.23	0	0	0	0	0	0	0	0	0	0	0	101480	0	114520	540650	0	0	0	0	0	0	0	0	0	0	0	0	0	0	0	0	0	0	0	0	0	0	0	0	0	0	0	0
45	Probable serine carboxypeptidase CPVL OS=Homo sapiens OX=9606 GN=CPVL PE=1 SV=2	Q9H3G5	CPVL	54 kDa	NA	1	0	0	0	0	0	0	0	0	0	0	0	0	0	0	0	0	0	0	0	0	0	85734	89350	91280	0	0	95003	0	0	0	0	0	0	0	0	0	0	0	0	0	0	0	0
47	Stress-induced-phosphoprotein 1 OS=Homo sapiens OX=9606 GN=STIP1 PE=1 SV=1	P31948	STIP1	63 kDa	NA	1	0	0	0	0	0	0	0	0	0	0	0	0	0	0	0	0	0	0	0	0	0	0	0	0	0	0	0	0	125890	87825	0	0	0	0	0	0	0	0	0	0	0	0	0
48	Polyamine deacetylase HDAC10 OS=Homo sapiens OX=9606 GN=HDAC10 PE=1 SV=1	Q969S8	HDAC10	71 kDa	NA	0.029	0	0	0	0	192350	265940	0	0	0	0	0	0	0	0	0	0	0	0	0	0	0	0	0	0	0	0	0	0	0	0	0	0	0	0	0	0	0	0	0	0	3	4	0
50	Triosephosphate isomerase OS=Homo sapiens OX=9606 GN=TPI1 PE=1 SV=4	P60174	TPI1	27 kDa	NA	1	0	0	0	0	0	0	0	0	0	0	0	0	0	0	0	0	0	0	0	0	0	0	0	0	0	69676	142060	79108	0	0	0	0	0	0	0	0	0	0	0	0	0	0	0
51	Elongation factor 2 OS=Homo sapiens OX=9606 GN=EEF2 PE=1 SV=4	P13639	EEF2	95 kDa	NA	1	0	0	0	0	0	0	0	0	0	0	0	0	0	0	0	0	0	0	0	0	0	0	0	0	0	0	0	112020	70396	107250	0	0	0	0	0	0	0	0	0	0	0	0	0
53	F-actin-capping protein subunit beta OS=Homo sapiens OX=9606 GN=CAPZB PE=1 SV=4	P47756	CAPZB	31 kDa	NA	1	0	0	0	0	0	0	0	0	0	0	0	0	0	0	0	0	0	0	0	0	0	81871	0	106310	0	0	0	0	0	0	0	0	0	0	0	0	0	0	0	0	0	0	0
55	D-3-phosphoglycerate dehydrogenase OS=Homo sapiens OX=9606 GN=PHGDH PE=1 SV=4	O43175	PHGDH	57 kDa	NA	1	0	0	0	0	0	0	0	0	0	0	0	0	0	0	0	0	0	0	0	0	0	0	0	0	0	0	46452	0	0	40997	0	0	0	0	0	0	0	0	0	0	0	0	0
57	Endoplasmin OS=Homo sapiens OX=9606 GN=HSP90B1 PE=1 SV=1	P14625	HSP90B1	92 kDa	TRUE	1	0	0	0	0	0	0	0	0	0	0	0	0	0	0	0	0	0	0	0	0	0	0	63876	113920	0	0	0	0	0	0	0	0	0	0	0	0	0	0	0	0	0	0	0
58	ATP-citrate synthase OS=Homo sapiens OX=9606 GN=ACLY PE=1 SV=3	P53396	ACLY	121 kDa	NA	1	0	0	0	0	0	0	0	0	0	0	0	0	0	0	0	0	0	0	0	0	0	0	0	0	0	0	0	0	0	0	56350	0	91293	0	0	0	0	0	0	0	0	0	0
60	Protein disulfide-isomerase A6 OS=Homo sapiens OX=9606 GN=PDIA6 PE=1 SV=1	Q15084	PDIA6	48 kDa	NA	0.029	0	0	0	0	0	0	0	0	0	0	0	0	0	77301	107140	0	0	0	0	0	0	0	0	0	0	0	0	0	0	0	0	0	0	0	0	0	0	0	0	0	0	0	0
61	X-ray repair cross-complementing protein 6 OS=Homo sapiens OX=9606 GN=XRCC6 PE=1 SV=2	P12956	XRCC6	70 kDa	NA	1	0	0	0	0	0	0	0	0	0	0	0	0	0	0	0	0	0	0	50466	0	39090	0	0	0	0	0	0	0	0	0	0	0	0	0	0	0	0	0	0	0	0	0	0
63	40S ribosomal protein SA OS=Homo sapiens OX=9606 GN=RPSA PE=1 SV=4	P08865	RPSA	33 kDa	NA	0.023	0	0	0	0	0	0	0	0	0	0	82148	84298	0	0	0	0	0	0	0	0	0	0	0	0	0	0	0	0	0	0	0	0	0	0	0	0	0	0	0	0	0	0	0
[truncated: 29 more columns]
