# Supplementary material for: A specific role for importin-5 and NASP in the import and nuclear hand-off of monomeric H3
Source: eLife. 2022 Sep 6;11:e81755. doi: 10.7554/eLife.81755 (PMC9560165; doi:10.7554/eLife.81755)
Supplement: Figure 5—source data 1. [file elife-81755-fig5-data1.csv]

pearson	transfection
-0.045	H3.mCherry
-0.3929	H3.mCherry
-0.2795	H3.mCherry
-0.1722	H3.mCherry
-0.1781	H3.mCherry
-0.1838	H3.mCherry
-0.3022	H3.mCherry
-0.3921	H3.mCherry
-0.2855	H3.mCherry
-0.2371	H3.mCherry
-0.2435	H3.mCherry
-0.1594	H3.mCherry
-0.1504	H3.mCherry
-0.0519	H3.mCherry
-0.2239	H3.mCherry
-0.3127	H3.mCherry
-0.2759	H3.mCherry
-0.205	H3.mCherry
-0.153	H3.mCherry
-0.3262	H3.mCherry
-0.1736	H3.mCherry
-0.0982	H3.mCherry
-0.1757	H3.mCherry
-0.2974	H3.mCherry
-0.1777	H3.mCherry
0.6449704	H3.IPO4
0.6642857	H3.IPO4
0.4843206	H3.IPO4
0.6375	H3.IPO4
0.6708075	H3.IPO4
0.7515528	H3.IPO4
0.5800866	H3.IPO4
0.5092593	H3.IPO4
0.8032129	H3.IPO4
0.7142857	H3.IPO4
0.7272727	H3.IPO4
0.6413043	H3.IPO4
0.5429363	H3.IPO4
0.6896552	H3.IPO4
0.8059701	H3.IPO4
0.6165803	H3.IPO4
0.5796178	H3.IPO4
0.4531835	H3.IPO4
0.6219931	H3.IPO4
0.6418219	H3.IPO4
0.7536232	H3.IPO4
0.4281046	H3.IPO4
0.6036745	H3.IPO4
0.62249	H3.IPO4
0.6590164	H3.IPO4
0.8194	H3.IPO5
0.7504	H3.IPO5
0.794	H3.IPO5
0.8425	H3.IPO5
0.5172	H3.IPO5
0.5224	H3.IPO5
0.5893	H3.IPO5
0.6222	H3.IPO5
0.5122	H3.IPO5
0.4274	H3.IPO5
0.5042	H3.IPO5
0.7869	H3.IPO5
0.6041	H3.IPO5
0.8245	H3.IPO5
0.7871	H3.IPO5
0.6088	H3.IPO5
0.8341	H3.IPO5
0.7231	H3.IPO5
0.7418	H3.IPO5
0.822	H3.IPO5
0.6397	H3.IPO5
