# Supplementary material for: A specific role for importin-5 and NASP in the import and nuclear hand-off of monomeric H3
Source: eLife. 2022 Sep 6;11:e81755. doi: 10.7554/eLife.81755 (PMC9560165; doi:10.7554/eLife.81755)
Supplement: Figure 5—source data 2. [file elife-81755-fig5-data2.csv]

Time	Nuclear	Cell
1.333333333	0	cell1
2.666666667	0.027534813	cell1
4	0.076920648	cell1
5.333333333	0.124506615	cell1
6.666666667	0.174523982	cell1
8	0.215763049	cell1
9.333333333	0.24369257	cell1
10.66666667	0.261754397	cell1
12	0.281931858	cell1
13.33333333	0.308882503	cell1
14.66666667	0.330070416	cell1
16	0.35834728	cell1
17.33333333	0.416164072	cell1
18.66666667	0.460971297	cell1
20	0.507404718	cell1
21.33333333	0.570479017	cell1
22.66666667	0.606129022	cell1
24	0.642236888	cell1
25.33333333	0.659414569	cell1
26.66666667	0.654851748	cell1
28		cell1
29.33333333		cell1
30.66666667		cell1
32		cell1
33.33333333		cell1
34.66666667		cell1
36		cell1
37.33333333	0.778884714	cell1
38.66666667	0.799298999	cell1
40	0.823028829	cell1
41.33333333	0.862799583	cell1
42.66666667	0.874830276	cell1
44	0.883229657	cell1
45.33333333	0.900502068	cell1
46.66666667	0.906249013	cell1
48	0.892465818	cell1
49.33333333	0.920632164	cell1
50.66666667	0.930326186	cell1
52	0.943288389	cell1
53.33333333	0.956582147	cell1
54.66666667	0.964997316	cell1
56	0.970917932	cell1
57.33333333	0.963386908	cell1
58.66666667	0.983532792	cell1
60	1	cell1
1.333333333	0	cell2
2.666666667	0.053105263	cell2
4	0.104236842	cell2
5.333333333	0.151578947	cell2
6.666666667	0.175789474	cell2
8	0.230526316	cell2
9.333333333	0.259447368	cell2
10.66666667	0.256657895	cell2
12	0.270552632	cell2
13.33333333	0.272631579	cell2
14.66666667	0.301368421	cell2
16	0.327078947	cell2
17.33333333	0.413105263	cell2
18.66666667	0.456210526	cell2
20	0.485684211	cell2
21.33333333	0.556210526	cell2
22.66666667	0.604578947	cell2
24	0.639736842	cell2
25.33333333	0.645052632	cell2
26.66666667	0.647210526	cell2
28		cell2
29.33333333		cell2
30.66666667		cell2
32		cell2
33.33333333		cell2
34.66666667		cell2
36		cell2
37.33333333	0.789342105	cell2
38.66666667	0.798368421	cell2
40	0.821815789	cell2
41.33333333	0.851026316	cell2
42.66666667	0.875210526	cell2
44	0.873684211	cell2
45.33333333	0.878	cell2
46.66666667	0.883921053	cell2
48	0.887473684	cell2
49.33333333	0.884736842	cell2
50.66666667	0.914763158	cell2
52	0.923157895	cell2
53.33333333	0.943447368	cell2
54.66666667	0.961131579	cell2
56	0.976947368	cell2
57.33333333	0.994	cell2
58.66666667	0.999394737	cell2
60	1	cell2
1.333333333	0	cell3
2.666666667	0.02050849	cell3
4	0.063758326	cell3
5.333333333	0.127629234	cell3
6.666666667	0.185777277	cell3
8	0.204559527	cell3
9.333333333	0.225086781	cell3
10.66666667	0.221108922	cell3
12	0.230134159	cell3
13.33333333	0.238408856	cell3
14.66666667	0.243024674	cell3
16	0.266160053	cell3
17.33333333	0.355286612	cell3
18.66666667	0.405929262	cell3
20	0.457078525	cell3
21.33333333	0.527272727	cell3
22.66666667	0.565475185	cell3
24	0.597485693	cell3
25.33333333	0.60414673	cell3
26.66666667	0.628558026	cell3
28		cell3
29.33333333		cell3
30.66666667		cell3
32		cell3
33.33333333		cell3
34.66666667		cell3
36		cell3
37.33333333	0.775288489	cell3
38.66666667	0.793826813	cell3
40	0.814447884	cell3
41.33333333	0.847696782	cell3
42.66666667	0.826062482	cell3
44	0.82491791	cell3
45.33333333	0.831597711	cell3
46.66666667	0.838202458	cell3
48	0.804522	cell3
49.33333333	0.810188573	cell3
50.66666667	0.832423304	cell3
52	0.873684211	cell3
53.33333333	0.89364856	cell3
54.66666667	0.906820527	cell3
56	0.934384089	cell3
57.33333333	0.940407168	cell3
58.66666667	0.953729243	cell3
60	1	cell3
1.333333333	0	cell4
2.666666667	0.026259029	cell4
4	0.045844733	cell4
5.333333333	0.064923785	cell4
6.666666667	0.094179297	cell4
8	0.125895688	cell4
9.333333333	0.159276791	cell4
10.66666667	0.201589438	cell4
12	0.238401297	cell4
13.33333333	0.275126301	cell4
14.66666667	0.310070786	cell4
16	0.353179601	cell4
17.33333333	0.382724628	cell4
18.66666667	0.420868256	cell4
20	0.452251705	cell4
21.33333333	0.483881241	cell4
22.66666667	0.520027214	cell4
24	0.549601193	cell4
25.33333333	0.577857877	cell4
26.66666667	0.607489758	cell4
28	0.651105224	cell4
29.33333333	0.68625237	cell4
30.66666667	0.721746935	cell4
32	0.737728174	cell4
33.33333333	0.766679695	cell4
34.66666667	0.802536153	cell4
36	0.818430538	cell4
37.33333333	0.84720835	cell4
38.66666667	0.865621517	cell4
40	0.9028966	cell4
41.33333333	0.912638786	cell4
42.66666667	0.913536283	cell4
44	0.927085595	cell4
45.33333333	0.961147059	cell4
46.66666667	0.97401601	cell4
48	1	cell4
49.33333333	0.973523834	cell4
50.66666667	0.951940476	cell4
52	0.942473328	cell4
53.33333333	0.916301154	cell4
54.66666667	0.950478424	cell4
56	0.944340701	cell4
57.33333333	0.967675627	cell4
58.66666667	0.959077026	cell4
60	0.9700207	cell4
1.333333333	0	cell5
2.666666667	0.012553927	cell5
4	0.033580784	cell5
5.333333333	0.033658518	cell5
6.666666667	0.047495045	cell5
8	0.051109643	cell5
9.333333333	0.097205488	cell5
10.66666667	0.135294804	cell5
12	0.125966808	cell5
13.33333333	0.186987446	cell5
14.66666667	0.199036107	cell5
16	0.233355358	cell5
17.33333333	0.268879475	cell5
18.66666667	0.302382526	cell5
20	0.363014497	cell5
21.33333333	0.39266975	cell5
22.66666667	0.433168798	cell5
24	0.45819892	cell5
25.33333333	0.492595903	cell5
26.66666667	0.533600218	cell5
28	0.553344475	cell5
29.33333333	0.589607058	cell5
30.66666667	0.622760309	cell5
32	0.653115162	cell5
33.33333333	0.692487077	cell5
34.66666667	0.717828132	cell5
36	0.757666446	cell5
37.33333333	0.774845505	cell5
38.66666667	0.802751759	cell5
40	0.865793463	cell5
41.33333333	0.888647052	cell5
42.66666667	0.886936919	cell5
44	0.90096778	cell5
45.33333333	0.951222356	cell5
46.66666667	0.945819892	cell5
48	0.96439815	cell5
49.33333333	0.970850014	cell5
50.66666667	0.912005908	cell5
52	0.961288818	cell5
53.33333333	0.941738894	cell5
54.66666667	0.971510747	cell5
56	0.958723619	cell5
57.33333333	0.954914688	cell5
58.66666667	0.965680749	cell5
60	1	cell5
1.333333333	0	cell6
2.666666667	0.0008362	cell6
4	0.017799121	cell6
5.333333333	0.035813265	cell6
6.666666667	0.079080657	cell6
8	0.117617546	cell6
9.333333333	0.13763857	cell6
10.66666667	0.168410742	cell6
12	0.222477064	cell6
13.33333333	0.282205657	cell6
14.66666667	0.321244266	cell6
16	0.344849006	cell6
17.33333333	0.389119839	cell6
18.66666667	0.439291858	cell6
20	0.485760703	cell6
21.33333333	0.514597668	cell6
22.66666667	0.526495604	cell6
24	0.564244075	cell6
25.33333333	0.596688647	cell6
26.66666667	0.656871177	cell6
28	0.703841743	cell6
29.33333333	0.733180428	cell6
30.66666667	0.762996942	cell6
32	0.783089641	cell6
33.33333333	0.785096521	cell6
34.66666667	0.806574924	cell6
36	0.821411506	cell6
37.33333333	0.850272362	cell6
38.66666667	0.861525229	cell6
40	0.905652714	cell6
41.33333333	0.900468272	cell6
42.66666667	0.911721139	cell6
44	0.942708333	cell6
45.33333333	0.943998471	cell6
46.66666667	0.978784404	cell6
48	0.979978976	cell6
49.33333333	0.963231078	cell6
50.66666667	0.978211009	cell6
52	0.968033257	cell6
53.33333333	0.953029434	cell6
54.66666667	0.982176988	cell6
56	0.944070145	cell6
57.33333333	0.967364297	cell6
58.66666667	0.966456422	cell6
60	1	cell6
1.333333333	0	cell7
2.666666667	0.031947041	cell7
4	0.062615075	cell7
5.333333333	0.094941601	cell7
6.666666667	0.157598842	cell7
8	0.23544955	cell7
9.333333333	0.269617282	cell7
10.66666667	0.324558321	cell7
12	0.362970667	cell7
13.33333333	0.399007716	cell7
14.66666667	0.424292682	cell7
16	0.477673615	cell7
17.33333333	0.473653881	cell7
18.66666667	0.517927167	cell7
20	0.542481272	cell7
21.33333333	0.551195379	cell7
22.66666667	0.583170529	cell7
24	0.621301775	cell7
25.33333333	0.649200973	cell7
26.66666667	0.673670747	cell7
28	0.718703004	cell7
29.33333333	0.756468819	cell7
30.66666667	0.798732238	cell7
32	0.809315661	cell7
33.33333333	0.834052481	cell7
34.66666667	0.849808149	cell7
36	0.859126622	cell7
37.33333333	0.882359555	cell7
38.66666667	0.88220495	cell7
40	0.908614316	cell7
41.33333333	0.917511139	cell7
42.66666667	0.944257825	cell7
44	0.953070317	cell7
45.33333333	0.998158794	cell7
46.66666667	0.986703959	cell7
48	1	cell7
49.33333333	0.954110388	cell7
50.66666667	0.948263503	cell7
52	0.953084372	cell7
53.33333333	0.953238977	cell7
54.66666667	0.988840321	cell7
56	0.976078371	cell7
57.33333333	1	cell7
58.66666667	0.977694697	cell7
60	0.999016149	cell7
1.333333333	0	cell8
2.666666667	0.036362174	cell8
4	0.034531998	cell8
5.333333333	0.066550018	cell8
6.666666667	0.089175818	cell8
8	0.132577129	cell8
9.333333333	0.175395197	cell8
10.66666667	0.223080327	cell8
12	0.249909497	cell8
13.33333333	0.304633764	cell8
14.66666667	0.34743172	cell8
16	0.393628575	cell8
17.33333333	0.428623145	cell8
18.66666667	0.482623386	cell8
20	0.510116246	cell8
21.33333333	0.536643739	cell8
22.66666667	0.573367926	cell8
24	0.601102128	cell8
25.33333333	0.612022847	cell8
26.66666667	0.630847512	cell8
28	0.683500261	cell8
29.33333333	0.731607739	cell8
30.66666667	0.75855758	cell8
32	0.77754314	cell8
33.33333333	0.792446	cell8
34.66666667	0.83848196	cell8
36	0.849644021	cell8
37.33333333	0.880917904	cell8
38.66666667	0.892924661	cell8
40	0.921664454	cell8
41.33333333	0.92558626	cell8
42.66666667	0.945114839	cell8
44	0.954808737	cell8
45.33333333	1	cell8
46.66666667	0.984956357	cell8
48	0.973311613	cell8
49.33333333	0.94601987	cell8
50.66666667	0.928140461	cell8
52	0.947990829	cell8
53.33333333	0.940951691	cell8
54.66666667	0.979224488	cell8
56	0.932384055	cell8
57.33333333	0.961264631	cell8
58.66666667	0.941032139	cell8
60	0.974618881	cell8
1.333333333	0	cell9
2.666666667	0.0123544	cell9
4	0.043032645	cell9
5.333333333	0.058295591	cell9
6.666666667	0.076411684	cell9
8	0.115358513	cell9
9.333333333	0.137186466	cell9
10.66666667	0.16219997	cell9
12	0.180399163	cell9
13.33333333	0.226465007	cell9
14.66666667	0.257711112	cell9
16	0.283846484	cell9
17.33333333	0.309109292	cell9
18.66666667	0.338000859	cell9
20	0.383166438	cell9
21.33333333	0.418969266	cell9
22.66666667	0.4520159	cell9
24	0.476392294	cell9
25.33333333	0.525117381	cell9
26.66666667	0.550227836	cell9
28	0.562069777	cell9
29.33333333	0.583219069	cell9
30.66666667	0.610808715	cell9
32	0.621570338	cell9
33.33333333	0.657553219	cell9
34.66666667	0.692483484	cell9
36	0.703896068	cell9
37.33333333	0.737178155	cell9
38.66666667	0.770127838	cell9
40	0.784393568	cell9
41.33333333	0.817107796	cell9
42.66666667	0.84022382	cell9
44	0.843797177	cell9
45.33333333	0.859323278	cell9
46.66666667	0.911954128	cell9
48	0.917923574	cell9
49.33333333	0.923366712	cell9
50.66666667	0.924917937	cell9
52	0.944003546	cell9
53.33333333	0.963435409	cell9
54.66666667	0.994349109	cell9
56	0.981163696	cell9
57.33333333	0.976205316	cell9
58.66666667	1	cell9
60	0.986842288	cell9
1.333333333	0	cell10
2.666666667	0.022702797	cell10
4	0.056538697	cell10
5.333333333	0.084640685	cell10
6.666666667	0.122653317	cell10
8	0.177183689	cell10
9.333333333	0.200585034	cell10
10.66666667	0.223171406	cell10
12	0.260761999	cell10
13.33333333	0.313036645	cell10
14.66666667	0.352286288	cell10
16	0.387257327	cell10
17.33333333	0.424120267	cell10
18.66666667	0.469802369	cell10
20	0.506257822	cell10
21.33333333	0.541854644	cell10
22.66666667	0.567453503	cell10
24	0.605800856	cell10
25.33333333	0.649139913	cell10
26.66666667	0.661379049	cell10
28	0.665599441	cell10
29.33333333	0.692653608	cell10
30.66666667	0.717874087	cell10
32	0.718790931	cell10
33.33333333	0.754576942	cell10
34.66666667	0.787379573	cell10
36	0.803868207	cell10
37.33333333	0.800113514	cell10
38.66666667	0.842113689	cell10
40	0.853246791	cell10
41.33333333	0.878321739	cell10
42.66666667	0.905885264	cell10
44	0.910542248	cell10
45.33333333	0.917396746	cell10
46.66666667	0.930625491	cell10
48	0.956952004	cell10
49.33333333	0.953124545	cell10
50.66666667	0.926492418	cell10
52	0.93705795	cell10
53.33333333	0.948147394	cell10
54.66666667	0.95380854	cell10
56	0.972712984	cell10
57.33333333	0.983147539	cell10
58.66666667	0.994528044	cell10
60	1	cell10
1.333333333	0	cell11
2.666666667	0.016389008	cell11
4	0.059290901	cell11
5.333333333	0.077758793	cell11
6.666666667	0.109112915	cell11
8	0.16303574	cell11
9.333333333	0.195785277	cell11
10.66666667	0.242916133	cell11
12	0.268375338	cell11
13.33333333	0.320133846	cell11
14.66666667	0.358892211	cell11
16	0.397807205	cell11
17.33333333	0.431097821	cell11
18.66666667	0.482500356	cell11
20	0.508344013	cell11
21.33333333	0.544966539	cell11
22.66666667	0.585419336	cell11
24	0.607147942	cell11
25.33333333	0.64734444	cell11
26.66666667	0.674797095	cell11
28	0.706834686	cell11
29.33333333	0.738772604	cell11
30.66666667	0.784778585	cell11
32	0.811690161	cell11
33.33333333	0.825872134	cell11
34.66666667	0.836850349	cell11
36	0.87247615	cell11
37.33333333	0.896155489	cell11
38.66666667	0.916645308	cell11
40	0.924291613	cell11
41.33333333	0.962110209	cell11
42.66666667	0.975822298	cell11
44	0.978712801	cell11
45.33333333	0.99282358	cell11
46.66666667	0.990118183	cell11
48	1	cell11
49.33333333	0.965655703	cell11
50.66666667	0.939171294	cell11
52	0.946390431	cell11
53.33333333	0.960700555	cell11
54.66666667	0.952570127	cell11
56	0.969756514	cell11
57.33333333	0.97738858	cell11
58.66666667	0.975921971	cell11
60	0.999159903	cell11
1.333333333	0	cell12
2.666666667	0.014823066	cell12
4	0.049995716	cell12
5.333333333	0.077756833	cell12
6.666666667	0.126767201	cell12
8	0.184817068	cell12
9.333333333	0.212920915	cell12
10.66666667	0.243616657	cell12
12	0.293226801	cell12
13.33333333	0.33947391	cell12
14.66666667	0.372118927	cell12
16	0.398380601	cell12
17.33333333	0.428883558	cell12
18.66666667	0.489461057	cell12
20	0.55014566	cell12
21.33333333	0.565482821	cell12
22.66666667	0.589730957	cell12
24	0.629273413	cell12
25.33333333	0.656049182	cell12
26.66666667	0.681925285	cell12
28	0.696534144	cell12
29.33333333	0.727465513	cell12
30.66666667	0.759575015	cell12
32	0.783887413	cell12
33.33333333	0.807664296	cell12
34.66666667	0.820580927	cell12
36	0.841851598	cell12
37.33333333	0.852669009	cell12
38.66666667	0.889491046	cell12
40	0.899515894	cell12
41.33333333	0.934474338	cell12
42.66666667	0.966048325	cell12
44	0.966433896	cell12
45.33333333	0.97005398	cell12
46.66666667	0.973245652	cell12
48	1	cell12
49.33333333	0.987447519	cell12
50.66666667	0.951182418	cell12
52	0.97982178	cell12
53.33333333	0.985776712	cell12
54.66666667	0.982627881	cell12
56	0.980378716	cell12
57.33333333	0.969796933	cell12
58.66666667	0.976951418	cell12
60	0.993937966	cell12
1.333333333	0.033290727	cell13
2.666666667	0	cell13
4	0.032898559	cell13
5.333333333	0.066349059	cell13
6.666666667	0.126960841	cell13
8	0.174209854	cell13
9.333333333	0.207544155	cell13
10.66666667	0.256376365	cell13
12	0.277219382	cell13
13.33333333	0.323509761	cell13
14.66666667	0.337250174	cell13
16	0.369393446	cell13
17.33333333	0.402597025	cell13
18.66666667	0.424384151	cell13
20	0.468408668	cell13
21.33333333	0.495424704	cell13
22.66666667	0.522048571	cell13
24	0.538534162	cell13
25.33333333	0.554380665	cell13
26.66666667	0.587279224	cell13
28	0.60928422	cell13
29.33333333	0.617955496	cell13
30.66666667	0.642255403	cell13
32	0.659902975	cell13
33.33333333	0.70520567	cell13
34.66666667	0.723782826	cell13
36	0.742548803	cell13
37.33333333	0.772440739	cell13
38.66666667	0.789914013	cell13
40	0.796566349	cell13
41.33333333	0.814068673	cell13
42.66666667	0.831832442	cell13
44	0.84072159	cell13
45.33333333	0.871891703	cell13
46.66666667	0.898922264	cell13
48	0.910106321	cell13
49.33333333	0.91102138	cell13
50.66666667	0.933244248	cell13
52	0.957195561	cell13
53.33333333	0.967115966	cell13
54.66666667	0.978808389	cell13
56	0.96511155	cell13
57.33333333	0.979287706	cell13
58.66666667	0.990224843	cell13
60	1	cell13
1.333333333	0.034165067	cell14
2.666666667	0	cell14
4	0.005886116	cell14
5.333333333	0.067221156	cell14
6.666666667	0.122499467	cell14
8	0.17696737	cell14
9.333333333	0.221070591	cell14
10.66666667	0.265429729	cell14
12	0.301940712	cell14
13.33333333	0.343783323	cell14
14.66666667	0.323779057	cell14
16	0.37696737	cell14
17.33333333	0.393857965	cell14
18.66666667	0.411942845	cell14
20	0.44184261	cell14
21.33333333	0.449264235	cell14
22.66666667	0.521859672	cell14
24	0.522840691	cell14
25.33333333	0.562337385	cell14
26.66666667	0.560375347	cell14
28	0.582298998	cell14
29.33333333	0.623245895	cell14
30.66666667	0.642183835	cell14
32	0.672126253	cell14
33.33333333	0.648496481	cell14
34.66666667	0.669268501	cell14
36	0.690893581	cell14
37.33333333	0.700703775	cell14
38.66666667	0.744934954	cell14
40	0.757091064	cell14
41.33333333	0.749882704	cell14
42.66666667	0.790829601	cell14
44	0.791341437	cell14
45.33333333	0.805033056	cell14
46.66666667	0.831051397	cell14
48	0.858008104	cell14
49.33333333	0.867263809	cell14
50.66666667	0.849818725	cell14
52	0.878268287	cell14
53.33333333	0.884538281	cell14
54.66666667	0.888419706	cell14
56	0.869737684	cell14
57.33333333	0.934229047	cell14
58.66666667	0.956238004	cell14
60	1	cell14
1.333333333	0.016662259	cell15
2.666666667	0.029239766	cell15
4	0.017073672	cell15
5.333333333	0	cell15
6.666666667	0.038173323	cell15
8	0.11575421	cell15
9.333333333	0.138264422	cell15
10.66666667	0.152017397	cell15
12	0.148461606	cell15
13.33333333	0.162038261	cell15
14.66666667	0.161127274	cell15
16	0.189896853	cell15
17.33333333	0.170207764	cell15
18.66666667	0.191424961	cell15
20	0.222516089	cell15
21.33333333	0.254665139	cell15
22.66666667	0.27414852	cell15
24	0.31537806	cell15
25.33333333	0.313291604	cell15
26.66666667	0.33932822	cell15
28	0.379587998	cell15
29.33333333	0.398219166	cell15
30.66666667	0.39016721	cell15
32	0.439331159	cell15
33.33333333	0.444797085	cell15
34.66666667	0.460254489	cell15
36	0.450057304	cell15
37.33333333	0.48811308	cell15
38.66666667	0.524817068	cell15
40	0.537247642	cell15
41.33333333	0.596550001	cell15
42.66666667	0.570101972	cell15
44	0.606688413	cell15
45.33333333	0.640424344	cell15
46.66666667	0.673249287	cell15
48	0.677980546	cell15
49.33333333	0.712451145	cell15
50.66666667	0.734873196	cell15
52	0.781421729	cell15
53.33333333	0.85388933	cell15
54.66666667	0.87463634	cell15
56	0.868171266	cell15
57.33333333	0.899967675	cell15
58.66666667	0.950160158	cell15
60	1	cell15
