# Supplementary material for: A specific role for importin-5 and NASP in the import and nuclear hand-off of monomeric H3
Source: eLife. 2022 Sep 6;11:e81755. doi: 10.7554/eLife.81755 (PMC9560165; doi:10.7554/eLife.81755)
Supplement: Figure 5—source data 3. [file elife-81755-fig5-data3.csv]

Time	Pearson	Date	Image	Cell
1	0.8444	191130	image1	Cell1
2	0.8536	191130	image1	Cell1
3	0.8339	191130	image1	Cell1
4	0.8155	191130	image1	Cell1
5	0.7587	191130	image1	Cell1
6	0.7633	191130	image1	Cell1
7	0.7216	191130	image1	Cell1
8	0.6919	191130	image1	Cell1
9	0.664	191130	image1	Cell1
10	0.6279	191130	image1	Cell1
11	0.583	191130	image1	Cell1
12	0.557	191130	image1	Cell1
13	0.515	191130	image1	Cell1
14	0.4807	191130	image1	Cell1
15	0.4323	191130	image1	Cell1
16	0.3943	191130	image1	Cell1
17	0.3648	191130	image1	Cell1
18	0.3077	191130	image1	Cell1
19	0.2874	191130	image1	Cell1
20	0.2792	191130	image1	Cell1
21	0.2643	191130	image1	Cell1
22	0.2522	191130	image1	Cell1
23	0.2287	191130	image1	Cell1
24	0.2102	191130	image1	Cell1
25	0.1875	191130	image1	Cell1
26	0.1734	191130	image1	Cell1
27	0.1669	191130	image1	Cell1
28	0.1511	191130	image1	Cell1
29	0.1219	191130	image1	Cell1
30	0.0944	191130	image1	Cell1
1	0.8059	191130	image1	Cell2
2	0.8299	191130	image1	Cell2
3	0.8139	191130	image1	Cell2
4	0.7828	191130	image1	Cell2
5	0.7158	191130	image1	Cell2
6	0.763	191130	image1	Cell2
7	0.735	191130	image1	Cell2
8	0.7176	191130	image1	Cell2
9	0.6898	191130	image1	Cell2
10	0.6773	191130	image1	Cell2
11	0.637	191130	image1	Cell2
12	0.6017	191130	image1	Cell2
13	0.5726	191130	image1	Cell2
14	0.5521	191130	image1	Cell2
15	0.5257	191130	image1	Cell2
16	0.5129	191130	image1	Cell2
17	0.4789	191130	image1	Cell2
18	0.4548	191130	image1	Cell2
19	0.4375	191130	image1	Cell2
20	0.3886	191130	image1	Cell2
21	0.3768	191130	image1	Cell2
22	0.3564	191130	image1	Cell2
23	0.3323	191130	image1	Cell2
24	0.2943	191130	image1	Cell2
25	0.2752	191130	image1	Cell2
26	0.2603	191130	image1	Cell2
27	0.2294	191130	image1	Cell2
28	0.2078	191130	image1	Cell2
29	0.1777	191130	image1	Cell2
30	0.1536	191130	image1	Cell2
1	0.9167	211103	image1	Cell1
2	0.9063	211103	image1	Cell1
3	0.9051	211103	image1	Cell1
4	0.8842	211103	image1	Cell1
5	0.8651	211103	image1	Cell1
6	0.8225	211103	image1	Cell1
7	0.7806	211103	image1	Cell1
8	0.7675	211103	image1	Cell1
9	0.7332	211103	image1	Cell1
10	0.7436	211103	image1	Cell1
11	0.6491	211103	image1	Cell1
12	0.703	211103	image1	Cell1
13	0.6816	211103	image1	Cell1
14	0.6434	211103	image1	Cell1
15	0.5979	211103	image1	Cell1
16	0.6165	211103	image1	Cell1
17	0.5391	211103	image1	Cell1
18	0.4389	211103	image1	Cell1
19	0.3959	211103	image1	Cell1
20	0.3761	211103	image1	Cell1
21	0.4389	211103	image1	Cell1
22	0.3601	211103	image1	Cell1
23	0.2505	211103	image1	Cell1
24	0.2281	211103	image1	Cell1
25	0.2479	211103	image1	Cell1
26	0.1922	211103	image1	Cell1
27	0.1525	211103	image1	Cell1
28	0.1272	211103	image1	Cell1
29	0.0995	211103	image1	Cell1
30	0.0645	211103	image1	Cell1
1	0.8894	211103	image1	Cell2
2	0.8747	211103	image1	Cell2
3	0.8354	211103	image1	Cell2
4	0.7889	211103	image1	Cell2
5	0.8587	211103	image1	Cell2
6	0.7557	211103	image1	Cell2
7	0.7982	211103	image1	Cell2
8	0.7605	211103	image1	Cell2
9	0.6902	211103	image1	Cell2
10	0.6183	211103	image1	Cell2
11	0.5687	211103	image1	Cell2
12	0.5057	211103	image1	Cell2
13	0.6073	211103	image1	Cell2
14	0.4535	211103	image1	Cell2
15	0.3879	211103	image1	Cell2
16	0.4129	211103	image1	Cell2
17	0.3401	211103	image1	Cell2
18	0.2935	211103	image1	Cell2
19	0.2403	211103	image1	Cell2
20	0.1072	211103	image1	Cell2
21	0.0913	211103	image1	Cell2
22	0.2081	211103	image1	Cell2
23	0.1697	211103	image1	Cell2
24	0.0735	211103	image1	Cell2
25	0.1707	211103	image1	Cell2
26	0.0516	211103	image1	Cell2
27	0.1002	211103	image1	Cell2
28	0.0206	211103	image1	Cell2
29	0.0513	211103	image1	Cell2
30	-0.0072	211103	image1	Cell2
1	0.9038	211103	image2	Cell1
2	0.852	211103	image2	Cell1
3	0.8559	211103	image2	Cell1
4	0.8436	211103	image2	Cell1
5	0.8115	211103	image2	Cell1
6	0.773	211103	image2	Cell1
7	0.7346	211103	image2	Cell1
8	0.6775	211103	image2	Cell1
9	0.6035	211103	image2	Cell1
10	0.5633	211103	image2	Cell1
11	0.5029	211103	image2	Cell1
12	0.4416	211103	image2	Cell1
13	0.4073	211103	image2	Cell1
14	0.3532	211103	image2	Cell1
15	0.3113	211103	image2	Cell1
16	0.2733	211103	image2	Cell1
17	0.2094	211103	image2	Cell1
18	0.2269	211103	image2	Cell1
19	0.1832	211103	image2	Cell1
20	0.1424	211103	image2	Cell1
21	0.0651	211103	image2	Cell1
22	0.0393	211103	image2	Cell1
23	0.0045	211103	image2	Cell1
24	-0.0071	211103	image2	Cell1
25	-0.0073	211103	image2	Cell1
26	-0.0115	211103	image2	Cell1
27	-0.0471	211103	image2	Cell1
28	-0.0646	211103	image2	Cell1
29	-0.0835	211103	image2	Cell1
30	-0.1112	211103	image2	Cell1
1	0.8581	211103	image2	Cell2
2	0.8457	211103	image2	Cell2
3	0.8245	211103	image2	Cell2
4	0.8012	211103	image2	Cell2
5	0.7702	211103	image2	Cell2
6	0.7398	211103	image2	Cell2
7	0.704	211103	image2	Cell2
8	0.6522	211103	image2	Cell2
9	0.6207	211103	image2	Cell2
10	0.5728	211103	image2	Cell2
11	0.5318	211103	image2	Cell2
12	0.4983	211103	image2	Cell2
13	0.4644	211103	image2	Cell2
14	0.4334	211103	image2	Cell2
15	0.3956	211103	image2	Cell2
16	0.4659	211103	image2	Cell2
17	0.4556	211103	image2	Cell2
18	0.4285	211103	image2	Cell2
19	0.3961	211103	image2	Cell2
20	0.3834	211103	image2	Cell2
21	0.3317	211103	image2	Cell2
22	0.2944	211103	image2	Cell2
23	0.2419	211103	image2	Cell2
24	0.229	211103	image2	Cell2
25	0.2176	211103	image2	Cell2
26	0.2123	211103	image2	Cell2
27	0.2114	211103	image2	Cell2
28	0.1634	211103	image2	Cell2
29	0.1362	211103	image2	Cell2
30	0.1486	211103	image2	Cell2
1	0.5603	211103	image3	Cell1
2	0.5456	211103	image3	Cell1
3	0.5025	211103	image3	Cell1
4	0.4937	211103	image3	Cell1
5	0.4754	211103	image3	Cell1
6	0.3405	211103	image3	Cell1
7	0.3837	211103	image3	Cell1
8	0.4044	211103	image3	Cell1
9	0.4045	211103	image3	Cell1
10	0.4129	211103	image3	Cell1
11	0.4003	211103	image3	Cell1
12	0.3681	211103	image3	Cell1
13	0.3538	211103	image3	Cell1
14	0.361	211103	image3	Cell1
15	0.3435	211103	image3	Cell1
16	0.3246	211103	image3	Cell1
17	0.3771	211103	image3	Cell1
18	0.3518	211103	image3	Cell1
19	0.3149	211103	image3	Cell1
20	0.3126	211103	image3	Cell1
21	0.3097	211103	image3	Cell1
22	0.2894	211103	image3	Cell1
23	0.2817	211103	image3	Cell1
24	0.2565	211103	image3	Cell1
25	0.2565	211103	image3	Cell1
26	0.2441	211103	image3	Cell1
27	0.216	211103	image3	Cell1
28	0.23	211103	image3	Cell1
29	0.2248	211103	image3	Cell1
30	0.2248	211103	image3	Cell1
1	0.5448	211103	image3	Cell2
2	0.5209	211103	image3	Cell2
3	0.5161	211103	image3	Cell2
4	0.494	211103	image3	Cell2
5	0.4944	211103	image3	Cell2
6	0.4846	211103	image3	Cell2
7	0.4672	211103	image3	Cell2
8	0.4605	211103	image3	Cell2
9	0.4554	211103	image3	Cell2
10	0.4365	211103	image3	Cell2
11	0.4346	211103	image3	Cell2
12	0.439	211103	image3	Cell2
13	0.4506	211103	image3	Cell2
14	0.4404	211103	image3	Cell2
15	0.4426	211103	image3	Cell2
16	0.4352	211103	image3	Cell2
17	0.3548	211103	image3	Cell2
18	0.3076	211103	image3	Cell2
19	0.3131	211103	image3	Cell2
20	0.3463	211103	image3	Cell2
21	0.3367	211103	image3	Cell2
22	0.3021	211103	image3	Cell2
23	0.3236	211103	image3	Cell2
24	0.3102	211103	image3	Cell2
25	0.299	211103	image3	Cell2
26	0.2955	211103	image3	Cell2
27	0.3043	211103	image3	Cell2
28	0.2858	211103	image3	Cell2
29	0.2814	211103	image3	Cell2
30	0.3077	211103	image3	Cell2
1	0.7454	211108	image1	Cell1
2	0.7051	211108	image1	Cell1
3	0.68	211108	image1	Cell1
4	0.6363	211108	image1	Cell1
5	0.5867	211108	image1	Cell1
6	0.5283	211108	image1	Cell1
7	0.4979	211108	image1	Cell1
8	0.4529	211108	image1	Cell1
9	0.3351	211108	image1	Cell1
10	0.2997	211108	image1	Cell1
11	0.2832	211108	image1	Cell1
12	0.2526	211108	image1	Cell1
13	0.3369	211108	image1	Cell1
14	0.1916	211108	image1	Cell1
15	0.2108	211108	image1	Cell1
16	0.2249	211108	image1	Cell1
17	0.1774	211108	image1	Cell1
18	0.1384	211108	image1	Cell1
19	0.1603	211108	image1	Cell1
20	0.1642	211108	image1	Cell1
21	0.1689	211108	image1	Cell1
22	0.1762	211108	image1	Cell1
23	0.1873	211108	image1	Cell1
24	0.2066	211108	image1	Cell1
25	0.2069	211108	image1	Cell1
26	0.1782	211108	image1	Cell1
27	0.1951	211108	image1	Cell1
28	0.1843	211108	image1	Cell1
29	0.1666	211108	image1	Cell1
30	0.1864	211108	image1	Cell1
1	0.8518	211108	image1	Cell2
2	0.8421	211108	image1	Cell2
3	0.7944	211108	image1	Cell2
4	0.7507	211108	image1	Cell2
5	0.7027	211108	image1	Cell2
6	0.6499	211108	image1	Cell2
7	0.6357	211108	image1	Cell2
8	0.6151	211108	image1	Cell2
9	0.664	211108	image1	Cell2
10	0.6474	211108	image1	Cell2
11	0.6165	211108	image1	Cell2
12	0.5667	211108	image1	Cell2
13	0.4989	211108	image1	Cell2
14	0.4294	211108	image1	Cell2
15	0.5033	211108	image1	Cell2
16	0.5244	211108	image1	Cell2
17	0.4542	211108	image1	Cell2
18	0.3966	211108	image1	Cell2
19	0.4349	211108	image1	Cell2
20	0.2804	211108	image1	Cell2
21	0.306	211108	image1	Cell2
22	0.2987	211108	image1	Cell2
23	0.3054	211108	image1	Cell2
24	0.29	211108	image1	Cell2
25	0.3051	211108	image1	Cell2
26	0.2824	211108	image1	Cell2
27	0.2934	211108	image1	Cell2
28	0.2763	211108	image1	Cell2
29	0.2544	211108	image1	Cell2
30	0.2615	211108	image1	Cell2
1	0.9326	211108	image2	Cell1
2	0.9162	211108	image2	Cell1
3	0.8958	211108	image2	Cell1
4	0.8662	211108	image2	Cell1
5	0.8358	211108	image2	Cell1
6	0.8104	211108	image2	Cell1
7	0.7835	211108	image2	Cell1
8	0.7439	211108	image2	Cell1
9	0.7251	211108	image2	Cell1
10	0.6665	211108	image2	Cell1
11	0.6182	211108	image2	Cell1
12	0.5508	211108	image2	Cell1
13	0.5629	211108	image2	Cell1
14	0.5119	211108	image2	Cell1
15	0.4441	211108	image2	Cell1
16	0.4066	211108	image2	Cell1
17	0.3229	211108	image2	Cell1
18	0.2888	211108	image2	Cell1
19	0.2393	211108	image2	Cell1
20	0.2298	211108	image2	Cell1
21	0.2101	211108	image2	Cell1
22	0.1283	211108	image2	Cell1
23	0.1167	211108	image2	Cell1
24	0.1333	211108	image2	Cell1
25	0.1166	211108	image2	Cell1
26	0.1092	211108	image2	Cell1
27	0.1143	211108	image2	Cell1
28	0.1187	211108	image2	Cell1
29	0.0934	211108	image2	Cell1
30	0.0776	211108	image2	Cell1
1	0.7856	211108	image2	Cell2
2	0.7346	211108	image2	Cell2
3	0.671	211108	image2	Cell2
4	0.6108	211108	image2	Cell2
5	0.5632	211108	image2	Cell2
6	0.5287	211108	image2	Cell2
7	0.4891	211108	image2	Cell2
8	0.4422	211108	image2	Cell2
9	0.4581	211108	image2	Cell2
10	0.4087	211108	image2	Cell2
11	0.3796	211108	image2	Cell2
12	0.344	211108	image2	Cell2
13	0.2983	211108	image2	Cell2
14	0.2754	211108	image2	Cell2
15	0.2451	211108	image2	Cell2
16	0.2181	211108	image2	Cell2
17	0.1721	211108	image2	Cell2
18	0.1465	211108	image2	Cell2
19	0.175	211108	image2	Cell2
20	0.1738	211108	image2	Cell2
21	0.1702	211108	image2	Cell2
22	0.1548	211108	image2	Cell2
23	0.1548	211108	image2	Cell2
24	0.1574	211108	image2	Cell2
25	0.1386	211108	image2	Cell2
26	0.1346	211108	image2	Cell2
27	0.1257	211108	image2	Cell2
28	0.1334	211108	image2	Cell2
29	0.1258	211108	image2	Cell2
30	0.1214	211108	image2	Cell2
1	0.8397	211108	image2	Cell3
2	0.8571	211108	image2	Cell3
3	0.8291	211108	image2	Cell3
4	0.7936	211108	image2	Cell3
5	0.7479	211108	image2	Cell3
6	0.7022	211108	image2	Cell3
7	0.6612	211108	image2	Cell3
8	0.6199	211108	image2	Cell3
9	0.5611	211108	image2	Cell3
10	0.5206	211108	image2	Cell3
11	0.4938	211108	image2	Cell3
12	0.4756	211108	image2	Cell3
13	0.4419	211108	image2	Cell3
14	0.4154	211108	image2	Cell3
15	0.3899	211108	image2	Cell3
16	0.3594	211108	image2	Cell3
17	0.3407	211108	image2	Cell3
18	0.3333	211108	image2	Cell3
19	0.2982	211108	image2	Cell3
20	0.2789	211108	image2	Cell3
21	0.2789	211108	image2	Cell3
22	0.2665	211108	image2	Cell3
23	0.2567	211108	image2	Cell3
24	0.2636	211108	image2	Cell3
25	0.2585	211108	image2	Cell3
26	0.2597	211108	image2	Cell3
27	0.2759	211108	image2	Cell3
28	0.2576	211108	image2	Cell3
29	0.2576	211108	image2	Cell3
30	0.2401	211108	image2	Cell3
1	0.6532	211108	image4	Cell1
2	0.6274	211108	image4	Cell1
3	0.5815	211108	image4	Cell1
4	0.5043	211108	image4	Cell1
5	0.4268	211108	image4	Cell1
6	0.3493	211108	image4	Cell1
7	0.2872	211108	image4	Cell1
8	0.2192	211108	image4	Cell1
9	0.149	211108	image4	Cell1
10	0.0742	211108	image4	Cell1
11	0.0138	211108	image4	Cell1
12	-0.0141	211108	image4	Cell1
13	-0.0493	211108	image4	Cell1
14	-0.0773	211108	image4	Cell1
15	-0.1097	211108	image4	Cell1
16	-0.1161	211108	image4	Cell1
17	-0.1276	211108	image4	Cell1
18	-0.143	211108	image4	Cell1
19	-0.1553	211108	image4	Cell1
20	-0.1575	211108	image4	Cell1
21	-0.1636	211108	image4	Cell1
22	-0.1451	211108	image4	Cell1
23	-0.1471	211108	image4	Cell1
24	-0.1518	211108	image4	Cell1
25	-0.1518	211108	image4	Cell1
26	-0.1422	211108	image4	Cell1
27	-0.152	211108	image4	Cell1
28	-0.1379	211108	image4	Cell1
29	-0.127	211108	image4	Cell1
30	-0.1359	211108	image4	Cell1
1	0.7296	211108	image4	Cell2
2	0.7489	211108	image4	Cell2
3	0.7397	211108	image4	Cell2
4	0.7246	211108	image4	Cell2
5	0.6729	211108	image4	Cell2
6	0.6213	211108	image4	Cell2
7	0.5787	211108	image4	Cell2
8	0.5166	211108	image4	Cell2
9	0.4142	211108	image4	Cell2
10	0.3581	211108	image4	Cell2
11	0.2961	211108	image4	Cell2
12	0.2415	211108	image4	Cell2
13	0.2103	211108	image4	Cell2
14	0.1564	211108	image4	Cell2
15	0.1327	211108	image4	Cell2
16	0.1047	211108	image4	Cell2
17	0.0901	211108	image4	Cell2
18	0.0675	211108	image4	Cell2
19	0.0548	211108	image4	Cell2
20	0.0369	211108	image4	Cell2
21	0.0462	211108	image4	Cell2
22	0.031	211108	image4	Cell2
23	0.0176	211108	image4	Cell2
24	0.0015	211108	image4	Cell2
25	-0.0128	211108	image4	Cell2
26	0.0174	211108	image4	Cell2
27	0.031	211108	image4	Cell2
28	0.0276	211108	image4	Cell2
29	0.0119	211108	image4	Cell2
30	0.0062	211108	image4	Cell2
1	0.7196	211108	image4	Cell3
2	0.7543	211108	image4	Cell3
3	0.7405	211108	image4	Cell3
4	0.7115	211108	image4	Cell3
5	0.6552	211108	image4	Cell3
6	0.6118	211108	image4	Cell3
7	0.5565	211108	image4	Cell3
8	0.4992	211108	image4	Cell3
9	0.4489	211108	image4	Cell3
10	0.4044	211108	image4	Cell3
11	0.3321	211108	image4	Cell3
12	0.3104	211108	image4	Cell3
13	0.2558	211108	image4	Cell3
14	0.2276	211108	image4	Cell3
15	0.1763	211108	image4	Cell3
16	0.1525	211108	image4	Cell3
17	0.1233	211108	image4	Cell3
18	0.1036	211108	image4	Cell3
19	0.0698	211108	image4	Cell3
20	0.0454	211108	image4	Cell3
21	0.0503	211108	image4	Cell3
22	0.0399	211108	image4	Cell3
23	0.0309	211108	image4	Cell3
24	0.0302	211108	image4	Cell3
25	0.0241	211108	image4	Cell3
26	0.0149	211108	image4	Cell3
27	0.0131	211108	image4	Cell3
28	0.0053	211108	image4	Cell3
29	-0.0026	211108	image4	Cell3
30	-0.0087	211108	image4	Cell3
1	0.6713	211108	image4	Cell4
2	0.6407	211108	image4	Cell4
3	0.5975	211108	image4	Cell4
4	0.521	211108	image4	Cell4
5	0.4513	211108	image4	Cell4
6	0.3688	211108	image4	Cell4
7	0.3209	211108	image4	Cell4
8	0.2566	211108	image4	Cell4
9	0.1789	211108	image4	Cell4
10	0.1223	211108	image4	Cell4
11	0.0965	211108	image4	Cell4
12	0.055	211108	image4	Cell4
13	0.0228	211108	image4	Cell4
14	0.0122	211108	image4	Cell4
15	-0.0034	211108	image4	Cell4
16	-0.0031	211108	image4	Cell4
17	-0.0209	211108	image4	Cell4
18	-0.055	211108	image4	Cell4
19	-0.0475	211108	image4	Cell4
20	-0.0605	211108	image4	Cell4
21	-0.0627	211108	image4	Cell4
22	-0.061	211108	image4	Cell4
23	-0.0749	211108	image4	Cell4
24	-0.0782	211108	image4	Cell4
25	-0.0751	211108	image4	Cell4
26	-0.0826	211108	image4	Cell4
27	-0.0718	211108	image4	Cell4
28	-0.0751	211108	image4	Cell4
29	-0.0632	211108	image4	Cell4
30	-0.0598	211108	image4	Cell4
