# Supplementary material for: A specific role for importin-5 and NASP in the import and nuclear hand-off of monomeric H3
Source: eLife. 2022 Sep 6;11:e81755. doi: 10.7554/eLife.81755 (PMC9560165; doi:10.7554/eLife.81755)
Supplement: Figure 5—source data 4. [file elife-81755-fig5-data4.xlsx]

## Sheet: MS_APEX_OMP25_control
Figure 5—Source Data 1. MS data for APEX2_OMP25 control						Normalised total precursor intensity				Exclusive unique peptide count
	Identified.Proteins..493.	Accession.Number	Alternate.ID	Molecular.Weight	Protein.Grouping.Ambiguity	Rep_1	Rep_2	Rep_3	Rep_4	Rep_1	Rep_2	Rep_3	Rep_4
1	Cluster of Acetyl-CoA carboxylase 1 OS=Homo sapiens GN=ACACA PE=1 SV=2 (ACACA_HUMAN)	ACACA_HUMAN [3]	ACACA	266 kDa	TRUE	4060000000	6660000000	8930000000	6070000000	192	204	195	202
2	Pyruvate carboxylase, mitochondrial OS=Homo sapiens GN=PC PE=1 SV=2	PYC_HUMAN	PC	130 kDa	NA	4360000000	8580000000	10700000000	6970000000	63	65	61	62
3	CON__Streptavidin	CON__Streptavidin	CON__Streptavidin	?	NA	44000000000	41800000000	34700000000	41700000000	10	9	9	10
4	Cluster of Methylcrotonoyl-CoA carboxylase subunit alpha, mitochondrial OS=Homo sapiens GN=MCCC1 PE=1 SV=3 (MCCA_HUMAN)	MCCA_HUMAN	MCCC1	80 kDa	TRUE	593000000	864000000	1360000000	811000000	37	38	34	36
5	Propionyl-CoA carboxylase alpha chain, mitochondrial OS=Homo sapiens GN=PCCA PE=1 SV=4	PCCA_HUMAN	PCCA	80 kDa	NA	228000000	370000000	552000000	324000000	41	42	38	38
6	Transmembrane protein 263 OS=Homo sapiens GN=TMEM263 PE=1 SV=1	TM263_HUMAN	TMEM263	12 kDa	NA	77300000	401000000	448000000	493000000	10	13	11	12
7	Cluster of Tubulin beta chain OS=Homo sapiens GN=TUBB PE=1 SV=1 (Q5JP53_HUMAN)	Q5JP53_HUMAN [4]	TUBB	48 kDa	TRUE	97800000	124000000	154000000	139000000	26	26	24	24
8	CON__P00761	CON__P00761	CON__P00761	?	NA	626000000	1240000000	2540000000	1060000000	8	9	8	7
9	Keratin, type II cytoskeletal 1 OS=Homo sapiens GN=KRT1 PE=1 SV=6	K2C1_HUMAN	KRT1	66 kDa	TRUE	864000000	158000000	26000000	62200000	43	29	14	19
10	Heat shock cognate 71 kDa protein OS=Homo sapiens GN=HSPA8 PE=1 SV=1	HSP7C_HUMAN	HSPA8	71 kDa	TRUE	51300000	50300000	70400000	40300000	22	20	21	18
11	60S ribosomal protein L4 OS=Homo sapiens GN=RPL4 PE=1 SV=5	RL4_HUMAN	RPL4	48 kDa	NA	352000000	16100000	37500000	189000000	31	14	14	21
12	Cluster of Tubulin alpha chain OS=Homo sapiens GN=TUBA1C PE=1 SV=1 (F5H5D3_HUMAN)	F5H5D3_HUMAN [4]	TUBA1C	58 kDa	TRUE	90000000	89400000	111000000	97200000	23	24	22	24
13	Cluster of Keratin, type I cytoskeletal 10 OS=Homo sapiens GN=KRT10 PE=1 SV=6 (K1C10_HUMAN)	K1C10_HUMAN [10]	KRT10	59 kDa	TRUE	721000000	37300000	37300000	44100000	42	25	17	21
14	Carbamoyl-phosphate synthase [ammonia], mitochondrial OS=Homo sapiens GN=CPS1 PE=1 SV=2	CPSM_HUMAN	CPS1	165 kDa	NA	18800000	25100000	40200000	27100000	25	32	28	30
15	Elongation factor 1-alpha 1 OS=Homo sapiens GN=EEF1A1 PE=1 SV=1	EF1A1_HUMAN	EEF1A1	50 kDa	NA	81200000	73900000	128000000	87900000	13	13	14	13
16	Cluster of Heat shock protein HSP 90-beta OS=Homo sapiens GN=HSP90AB1 PE=1 SV=4 (HS90B_HUMAN)	HS90B_HUMAN [4]	HSP90AB1	83 kDa	TRUE	41300000	6488900	5868800	7635600	33	10	8	11
17	60S ribosomal protein L3 OS=Homo sapiens GN=RPL3 PE=1 SV=2	RL3_HUMAN	RPL3	46 kDa	NA	158000000	12200000	36200000	125000000	18	9	13	15
18	Cluster of Actin, cytoplasmic 2 OS=Homo sapiens GN=ACTG1 PE=1 SV=1 (ACTG_HUMAN)	ACTG_HUMAN [4]	ACTG1	42 kDa	TRUE	48300000	3524100	7038600	17200000	19	7	10	13
19	60S ribosomal protein L7 OS=Homo sapiens GN=RPL7 PE=1 SV=1	RL7_HUMAN	RPL7	29 kDa	NA	275000000	13300000	20500000	161000000	19	10	10	16
20	Cluster of Methylcrotonoyl-CoA carboxylase beta chain, mitochondrial OS=Homo sapiens GN=MCCC2 PE=1 SV=1 (MCCB_HUMAN)	MCCB_HUMAN [2]	MCCC2	61 kDa	TRUE	5334700	13700000	75100000	44800000	10	14	21	23
21	Keratin, type I cytoskeletal 9 OS=Homo sapiens GN=KRT9 PE=1 SV=3	K1C9_HUMAN	KRT9	62 kDa	TRUE	289000000	102000000	324980	22600000	33	23	1	13
22	60S ribosomal protein L6 OS=Homo sapiens GN=RPL6 PE=1 SV=3	RL6_HUMAN	RPL6	33 kDa	NA	187000000	7311100	31400000	172000000	19	7	13	18
23	Stress-70 protein, mitochondrial OS=Homo sapiens GN=HSPA9 PE=1 SV=2	GRP75_HUMAN	HSPA9	74 kDa	TRUE	23800000	35300000	24800000	20900000	23	27	19	20
24	Histone H4 OS=Homo sapiens GN=HIST1H4A PE=1 SV=2	H4_HUMAN	HIST1H4A	11 kDa	NA	266000000	21700000	69300000	241000000	13	6	9	9
25	Reticulocalbin-1 OS=Homo sapiens GN=RCN1 PE=1 SV=1	RCN1_HUMAN	RCN1	39 kDa	NA	24900000	31900000	36900000	29200000	12	14	14	13
26	Myosin-9 OS=Homo sapiens GN=MYH9 PE=1 SV=4	MYH9_HUMAN	MYH9	227 kDa	NA	31100000	7934700	4449200	7558000	43	18	7	15
27	Keratin, type II cytoskeletal 8 OS=Homo sapiens GN=KRT8 PE=1 SV=7	K2C8_HUMAN (+1)	KRT8	54 kDa	TRUE	111000000	33400000	41000000	34200000	24	17	18	15
28	Cluster of Filamin-A OS=Homo sapiens GN=FLNA PE=1 SV=4 (FLNA_HUMAN)	FLNA_HUMAN [2]	FLNA	281 kDa	TRUE	11000000	7068000	2876900	6026700	25	25	10	13
29	Cluster of Heat shock 70 kDa protein 1B OS=Homo sapiens GN=HSPA1B PE=1 SV=1 (A0A0G2JIW1_HUMAN)	A0A0G2JIW1_HUMAN [4]	HSPA1B	70 kDa	TRUE	22600000	19700000	24700000	16300000	14	13	12	11
30	Cluster of Keratin, type I cytoskeletal 18 OS=Homo sapiens GN=KRT18 PE=1 SV=2 (K1C18_HUMAN)	K1C18_HUMAN [2]	KRT18	48 kDa	TRUE	33400000	18100000	36200000	24100000	17	15	15	15
31	Prostaglandin G/H synthase 2 OS=Homo sapiens GN=PTGS2 PE=1 SV=2	PGH2_HUMAN	PTGS2	69 kDa	NA	9993700	7628000	14000000	12800000	14	14	14	15
32	Perilipin-4 OS=Homo sapiens GN=PLIN4 PE=1 SV=1	A0A0J9YXN7_HUMAN	PLIN4	136 kDa	NA	2680300	16500000	21100000	25900000	6	23	21	25
33	Fatty acid synthase OS=Homo sapiens GN=FASN PE=1 SV=3	FAS_HUMAN	FASN	273 kDa	NA	10900000	4630600	5273700	4087100	22	12	8	11
34	Keratin, type II cytoskeletal 2 epidermal OS=Homo sapiens GN=KRT2 PE=1 SV=2	K22E_HUMAN (+1)	KRT2	65 kDa	TRUE	333000000	26100000	18300000	16400000	35	9	11	9
35	Cluster of Histone H2B type 1-D OS=Homo sapiens GN=HIST1H2BD PE=1 SV=2 (H2B1D_HUMAN)	H2B1D_HUMAN [2]	HIST1H2BD	14 kDa	TRUE	189000000	16900000	70600000	231000000	16	5	11	7
36	Cluster of Probable ATP-dependent RNA helicase DDX5 OS=Homo sapiens GN=DDX5 PE=1 SV=1 (DDX5_HUMAN)	DDX5_HUMAN [4]	DDX5	69 kDa	TRUE	10100000	6844400	17700000	9396900	18	15	16	17
37	60S ribosomal protein L7a OS=Homo sapiens GN=RPL7A PE=1 SV=2	RL7A_HUMAN	RPL7A	30 kDa	NA	151000000	2651500	5753700	53300000	23	5	6	17
38	Vimentin OS=Homo sapiens GN=VIM PE=1 SV=4	VIME_HUMAN	VIM	54 kDa	TRUE	4162800	6612600	12700000	16000000	6	13	14	18
39	Cluster of sp|11042005|11042005_1104-2 (11042005_1104-2)	11042005_1104-2 [2]	11042005_1104-2 [2]	77 kDa	TRUE	75600000	668670	2900400	10800000	6	1	1	1
40	40S ribosomal protein S3 OS=Homo sapiens GN=RPS3 PE=1 SV=2	RS3_HUMAN	RPS3	27 kDa	NA	25500000	6429100	25000000	21600000	16	10	13	12
41	40S ribosomal protein S8 OS=Homo sapiens GN=RPS8 PE=1 SV=2	RS8_HUMAN	RPS8	24 kDa	NA	68400000	9930600	26700000	82500000	10	8	8	12
42	RNA-binding protein 39 OS=Homo sapiens GN=RBM39 PE=1 SV=2	RBM39_HUMAN	RBM39	59 kDa	NA	28400000	23400000	16700000	22600000	16	17	12	15
43	60S ribosomal protein L18a OS=Homo sapiens GN=RPL18A PE=1 SV=2	RL18A_HUMAN	RPL18A	21 kDa	NA	162000000	8277900	33300000	130000000	14	6	8	9
44	78 kDa glucose-regulated protein OS=Homo sapiens GN=HSPA5 PE=1 SV=2	GRP78_HUMAN	HSPA5	72 kDa	TRUE	18000000	8324600	8774100	12300000	17	13	10	14
45	Prelamin-A/C OS=Homo sapiens GN=LMNA PE=1 SV=1	LMNA_HUMAN	LMNA	74 kDa	TRUE	2894300	1295800	23500000	17000000	8	10	21	23
46	Glyceraldehyde-3-phosphate dehydrogenase OS=Homo sapiens GN=GAPDH PE=1 SV=3	G3P_HUMAN	GAPDH	36 kDa	NA	38900000	23400000	25500000	24400000	13	8	7	9
47	60S ribosomal protein L15 OS=Homo sapiens GN=RPL15 PE=1 SV=2	RL15_HUMAN	RPL15	24 kDa	NA	93000000	5002500	12600000	27900000	12	6	6	7
48	60S ribosomal protein L18 (Fragment) OS=Homo sapiens GN=RPL18 PE=1 SV=1	J3QQ67_HUMAN (+1)	RPL18	22 kDa	NA	307000000	17000000	19500000	159000000	10	7	7	8
49	Propionyl-CoA carboxylase beta chain, mitochondrial OS=Homo sapiens GN=PCCB PE=1 SV=1	E9PDR0_HUMAN (+1)	PCCB	59 kDa	NA	3871400	15800000	22700000	6068700	6	17	15	10
50	Cluster of Keratin, type II cytoskeletal 7 OS=Homo sapiens GN=KRT7 PE=1 SV=5 (K2C7_HUMAN)	K2C7_HUMAN [10]	KRT7	51 kDa	TRUE	143000000	24100000	15800000	15100000	30	13	9	10
51	Elongation factor Tu, mitochondrial OS=Homo sapiens GN=TUFM PE=1 SV=2	EFTU_HUMAN	TUFM	50 kDa	NA	7974800	12600000	16800000	13200000	7	12	10	12
52	60S ribosomal protein L8 OS=Homo sapiens GN=RPL8 PE=1 SV=2	RL8_HUMAN	RPL8	28 kDa	NA	85400000	2083400	9348000	34500000	18	5	6	8
53	ATP synthase subunit alpha, mitochondrial OS=Homo sapiens GN=ATP5A1 PE=1 SV=1	ATPA_HUMAN	ATP5A1	60 kDa	NA	8272900	4321800	14700000	4704500	13	10	15	9
54	Elongation factor 2 OS=Homo sapiens GN=EEF2 PE=1 SV=4	EF2_HUMAN	EEF2	95 kDa	NA	6044800	0	227250	537020	12	0	2	2
55	Transferrin receptor protein 1 OS=Homo sapiens GN=TFRC PE=1 SV=2	TFR1_HUMAN	TFRC	85 kDa	NA	8001700	3901000	8244400	3641100	13	9	10	8
56	Lamin-B1 OS=Homo sapiens GN=LMNB1 PE=1 SV=2	LMNB1_HUMAN	LMNB1	66 kDa	TRUE	2172500	0	75000000	42800000	5	0	24	21
57	60S ribosomal protein L28 OS=Homo sapiens GN=RPL28 PE=1 SV=3	RL28_HUMAN	RPL28	16 kDa	NA	137000000	3408400	9910500	80500000	12	4	4	7
58	60S ribosomal protein L13a OS=Homo sapiens GN=RPL13A PE=1 SV=2	RL13A_HUMAN	RPL13A	24 kDa	NA	102000000	6427000	14700000	64800000	10	6	7	10
59	Calumenin OS=Homo sapiens GN=CALU PE=1 SV=2	CALU_HUMAN	CALU	37 kDa	NA	6811600	9516700	11200000	10100000	8	8	10	9
60	Heterogeneous nuclear ribonucleoprotein M OS=Homo sapiens GN=HNRNPM PE=1 SV=3	HNRPM_HUMAN	HNRNPM	78 kDa	NA	10100000	13400000	8684400	7503600	13	14	7	10
61	4F2 cell-surface antigen heavy chain OS=Homo sapiens GN=SLC3A2 PE=1 SV=3	4F2_HUMAN (+2)	SLC3A2	68 kDa	NA	5570100	8038600	10900000	4760900	11	11	12	8
62	60S ribosomal protein L14 OS=Homo sapiens GN=RPL14 PE=1 SV=4	RL14_HUMAN	RPL14	23 kDa	NA	98000000	4047500	8231700	66200000	9	3	3	5
63	Heterogeneous nuclear ribonucleoprotein U OS=Homo sapiens GN=HNRNPU PE=1 SV=6	HNRPU_HUMAN	HNRNPU	91 kDa	NA	8244500	2133100	8606800	6028100	14	5	10	9
64	Argininosuccinate synthase OS=Homo sapiens GN=ASS1 PE=1 SV=2	ASSY_HUMAN	ASS1	47 kDa	NA	1533100	6364000	10200000	5837300	3	7	9	6
65	60S ribosomal protein L12 OS=Homo sapiens GN=RPL12 PE=1 SV=1	RL12_HUMAN	RPL12	18 kDa	NA	77700000	3208900	5871300	35100000	8	5	4	8
66	Cluster of Fructose-bisphosphate aldolase A OS=Homo sapiens GN=ALDOA PE=1 SV=2 (ALDOA_HUMAN)	ALDOA_HUMAN	ALDOA	39 kDa	TRUE	1068800	0	0	0	4	0	0	0
67	RNA-binding protein 14 OS=Homo sapiens GN=RBM14 PE=1 SV=2	RBM14_HUMAN	RBM14	69 kDa	NA	4492300	7432500	5639900	2670500	10	10	9	5
68	60S ribosomal protein L5 OS=Homo sapiens GN=RPL5 PE=1 SV=3	RL5_HUMAN	RPL5	34 kDa	NA	23700000	0	1491700	19900000	11	0	2	10
69	60S ribosomal protein L32 (Fragment) OS=Homo sapiens GN=RPL32 PE=1 SV=1	D3YTB1_HUMAN (+2)	RPL32	16 kDa	NA	47300000	653380	7415900	49500000	10	1	2	7
70	60S ribosomal protein L27 OS=Homo sapiens GN=RPL27 PE=1 SV=2	RL27_HUMAN	RPL27	16 kDa	NA	39900000	1481200	3911400	13600000	10	3	4	8
71	DNA-dependent protein kinase catalytic subunit OS=Homo sapiens GN=PRKDC PE=1 SV=3	PRKDC_HUMAN	PRKDC	469 kDa	NA	6039200	1542200	1041600	2635500	17	7	4	7
72	60S ribosomal protein L11 OS=Homo sapiens GN=RPL11 PE=1 SV=2	RL11_HUMAN	RPL11	20 kDa	NA	23800000	2744700	8824200	19900000	6	4	6	9
73	40S ribosomal protein S23 OS=Homo sapiens GN=RPS23 PE=1 SV=3	RS23_HUMAN	RPS23	16 kDa	NA	15800000	13600000	28000000	26800000	7	8	8	7
74	Bifunctional glutamate/proline--tRNA ligase OS=Homo sapiens GN=EPRS PE=1 SV=5	SYEP_HUMAN	EPRS	171 kDa	NA	3371000	3255300	917420	3195900	8	11	3	8
75	60S ribosomal protein L21 OS=Homo sapiens GN=RPL21 PE=1 SV=2	RL21_HUMAN	RPL21	19 kDa	NA	41300000	3053800	2448100	32400000	5	3	1	5
76	ADP/ATP translocase 3 OS=Homo sapiens GN=SLC25A6 PE=1 SV=4	ADT3_HUMAN	SLC25A6	33 kDa	TRUE	22300000	15200000	41300000	25200000	4	3	7	6
77	60S ribosomal protein L10a OS=Homo sapiens GN=RPL10A PE=1 SV=2	RL10A_HUMAN	RPL10A	25 kDa	NA	58600000	0	0	7207200	12	0	0	6
78	Heterogeneous nuclear ribonucleoprotein A1 OS=Homo sapiens GN=HNRNPA1 PE=1 SV=2	F8W6I7_HUMAN (+1)	HNRNPA1	33 kDa	TRUE	9837500	182780	0	186630	8	1	0	1
79	40S ribosomal protein S11 OS=Homo sapiens GN=RPS11 PE=1 SV=1	M0QZC5_HUMAN (+1)	RPS11	14 kDa	NA	2361000	5802900	13100000	10100000	3	5	7	7
80	60S acidic ribosomal protein P0 OS=Homo sapiens GN=RPLP0 PE=1 SV=1	RLA0_HUMAN	RPLP0	34 kDa	NA	55100000	0	4548200	26100000	10	0	3	7
81	40S ribosomal protein S2 OS=Homo sapiens GN=RPS2 PE=1 SV=2	RS2_HUMAN	RPS2	31 kDa	NA	4841600	3325100	7655300	3277800	3	2	4	2
82	60 kDa heat shock protein, mitochondrial OS=Homo sapiens GN=HSPD1 PE=1 SV=2	CH60_HUMAN	HSPD1	61 kDa	NA	11000000	3047300	4124300	1159100	13	6	6	3
83	Prohibitin-2 OS=Homo sapiens GN=PHB2 PE=1 SV=1	F5GY37_HUMAN (+2)	PHB2	30 kDa	NA	4546700	2543300	7658100	4532900	8	6	9	7
84	60S ribosomal protein L13 OS=Homo sapiens GN=RPL13 PE=1 SV=4	RL13_HUMAN	RPL13	24 kDa	NA	9716400	2325200	4644600	32600000	6	3	3	8
85	Serpin H1 OS=Homo sapiens GN=SERPINH1 PE=1 SV=2	SERPH_HUMAN	SERPINH1	46 kDa	NA	6052300	5018500	5424100	3644800	7	7	6	6
86	Annexin A2 OS=Homo sapiens GN=ANXA2 PE=1 SV=2	ANXA2_HUMAN	ANXA2	39 kDa	NA	723760	0	0	0	2	0	0	0
87	60S ribosomal protein L35a OS=Homo sapiens GN=RPL35A PE=1 SV=2	RL35A_HUMAN	RPL35A	13 kDa	NA	36500000	1590200	0	22800000	7	3	0	6
88	60S ribosomal protein L23 OS=Homo sapiens GN=RPL23 PE=1 SV=1	RL23_HUMAN	RPL23	15 kDa	NA	9223100	10200000	17300000	14800000	5	6	5	8
89	60S acidic ribosomal protein P2 OS=Homo sapiens GN=RPLP2 PE=1 SV=1	RLA2_HUMAN	RPLP2	12 kDa	NA	60000000	460330	1317800	14100000	8	1	2	5
90	40S ribosomal protein S14 OS=Homo sapiens GN=RPS14 PE=1 SV=3	RS14_HUMAN	RPS14	16 kDa	NA	4427800	3447800	9880500	7756400	5	6	6	6
91	40S ribosomal protein S6 OS=Homo sapiens GN=RPS6 PE=1 SV=1	RS6_HUMAN	RPS6	29 kDa	NA	11300000	8107600	16200000	20200000	7	5	5	8
92	Clathrin heavy chain OS=Homo sapiens GN=CLTC PE=1 SV=1	A0A087WVQ6_HUMAN (+1)	CLTC	192 kDa	NA	2576900	0	683270	4481100	6	0	1	9
93	40S ribosomal protein S15a OS=Homo sapiens GN=RPS15A PE=1 SV=2	RS15A_HUMAN	RPS15A	15 kDa	NA	3842200	5236700	7475100	8276900	3	5	4	5
94	Heterogeneous nuclear ribonucleoprotein H OS=Homo sapiens GN=HNRNPH1 PE=1 SV=1	G8JLB6_HUMAN (+1)	HNRNPH1	51 kDa	TRUE	6339600	5265400	6943900	4910500	5	4	4	4
95	Mitochondrial amidoxime-reducing component 1 OS=Homo sapiens GN=MARC1 PE=1 SV=1	MARC1_HUMAN	2001-03-01	38 kDa	NA	0	0	0	0	0	0	0	0
96	40S ribosomal protein S9 OS=Homo sapiens GN=RPS9 PE=1 SV=1	A0A024R4M0_HUMAN (+1)	RPS9	23 kDa	NA	4083500	2503400	3494600	6312000	7	5	5	8
97	Catalase OS=Homo sapiens GN=CAT PE=1 SV=3	CATA_HUMAN	CAT	60 kDa	NA	5253100	2569000	4563100	3151600	7	7	6	8
98	Heat shock protein beta-1 OS=Homo sapiens GN=HSPB1 PE=1 SV=2	HSPB1_HUMAN	HSPB1	23 kDa	NA	10500000	3165900	4023000	2624600	9	4	5	5
99	Heterogeneous nuclear ribonucleoproteins A2/B1 OS=Homo sapiens GN=HNRNPA2B1 PE=1 SV=2	ROA2_HUMAN	HNRNPA2B1	37 kDa	TRUE	5538200	0	0	0	6	0	0	0
100	ADP/ATP translocase 2 OS=Homo sapiens GN=SLC25A5 PE=1 SV=7	ADT2_HUMAN	SLC25A5	33 kDa	TRUE	22900000	11800000	29700000	22000000	5	4	4	5
101	Cytoskeleton-associated protein 4 OS=Homo sapiens GN=CKAP4 PE=1 SV=2	CKAP4_HUMAN	CKAP4	66 kDa	NA	2115600	1270100	1823500	3600900	7	4	4	7
102	Peroxiredoxin-1 OS=Homo sapiens GN=PRDX1 PE=1 SV=1	PRDX1_HUMAN	PRDX1	22 kDa	TRUE	3826100	0	0	0	5	0	0	0
103	Heterogeneous nuclear ribonucleoprotein K OS=Homo sapiens GN=HNRNPK PE=1 SV=1	HNRPK_HUMAN	HNRNPK	51 kDa	NA	5131800	0	0	0	6	0	0	0
104	Prohibitin OS=Homo sapiens GN=PHB PE=1 SV=1	PHB_HUMAN	PHB	30 kDa	NA	4069100	2791400	6970900	5812100	6	5	6	7
105	Transitional endoplasmic reticulum ATPase OS=Homo sapiens GN=VCP PE=1 SV=4	TERA_HUMAN	VCP	89 kDa	NA	654970	0	0	0	2	0	0	0
106	60S ribosomal protein L30 OS=Homo sapiens GN=RPL30 PE=1 SV=2	RL30_HUMAN	RPL30	13 kDa	NA	32500000	885690	3514400	12800000	7	2	4	5
107	Peroxiredoxin-6 OS=Homo sapiens GN=PRDX6 PE=1 SV=3	PRDX6_HUMAN	PRDX6	25 kDa	NA	3155900	0	1499300	390010	2	0	4	2
108	Cluster of Phosphate carrier protein, mitochondrial OS=Homo sapiens GN=SLC25A3 PE=1 SV=1 (F8VVM2_HUMAN)	F8VVM2_HUMAN [2]	SLC25A3	36 kDa	TRUE	3376200	1982600	0	1697200	5	1	0	1
109	Neudesin OS=Homo sapiens GN=NENF PE=1 SV=1	NENF_HUMAN	NENF	19 kDa	NA	10500000	6805200	11600000	6540900	6	6	5	4
110	Brain acid soluble protein 1 OS=Homo sapiens GN=BASP1 PE=1 SV=2	BASP1_HUMAN	BASP1	23 kDa	NA	34700000	0	0	1730600	11	0	0	5
111	CON__P02769	CON__P02769	CON__P02769	?	NA	0	24000000	0	0	0	22	0	0
112	Nucleophosmin OS=Homo sapiens GN=NPM1 PE=1 SV=2	NPM_HUMAN	NPM1	33 kDa	NA	8523400	0	6372400	8728300	7	0	5	5
113	60S ribosomal protein L9 OS=Homo sapiens GN=RPL9 PE=1 SV=1	RL9_HUMAN	RPL9	22 kDa	NA	16300000	4036000	3897100	5903700	7	3	3	5
114	Non-POU domain-containing octamer-binding protein OS=Homo sapiens GN=NONO PE=1 SV=4	NONO_HUMAN	NONO	54 kDa	NA	3338300	1106000	2993000	1039600	6	4	6	3
115	Cluster of Histone H2A type 1-H OS=Homo sapiens GN=HIST1H2AH PE=1 SV=3 (H2A1H_HUMAN)	H2A1H_HUMAN [8]	HIST1H2AH	14 kDa	TRUE	176000000	16300000	67400000	287000000	5	2	3	2
116	40S ribosomal protein S24 OS=Homo sapiens GN=RPS24 PE=1 SV=1	A0A087WUS0_HUMAN (+2)	RPS24	15 kDa	NA	9431400	1511800	7388900	13500000	4	1	4	5
117	ATP-dependent RNA helicase DDX3X OS=Homo sapiens GN=DDX3X PE=1 SV=1	A0A0D9SF53_HUMAN (+3)	DDX3X	81 kDa	NA	1005000	0	440420	1626700	5	0	2	3
118	2-aminoethanethiol dioxygenase OS=Homo sapiens GN=ADO PE=1 SV=2	AEDO_HUMAN	ADO	30 kDa	NA	4177100	1821700	4754600	2677500	7	4	6	4
119	Eukaryotic initiation factor 4A-I OS=Homo sapiens GN=EIF4A1 PE=1 SV=1	IF4A1_HUMAN	EIF4A1	46 kDa	TRUE	2963500	0	1426300	330540	4	0	2	2
120	60S ribosomal protein L17 (Fragment) OS=Homo sapiens GN=RPL17 PE=3 SV=1	A0A087WXM6_HUMAN (+4)	RPL17	20 kDa	NA	1639000	1252200	4000700	4586800	3	3	3	6
121	Nuclear pore complex protein Nup214 OS=Homo sapiens GN=NUP214 PE=1 SV=2	NU214_HUMAN	NUP214	214 kDa	NA	911480	2076400	2230600	473720	3	8	5	3
122	Poly(rC)-binding protein 2 OS=Homo sapiens GN=PCBP2 PE=1 SV=1	PCBP2_HUMAN	PCBP2	39 kDa	TRUE	3882500	2563900	5169100	2860100	3	2	2	2
123	60S ribosomal protein L34 OS=Homo sapiens GN=RPL34 PE=1 SV=3	RL34_HUMAN	RPL34	13 kDa	NA	16500000	0	1005100	11300000	6	0	2	6
124	Pyruvate kinase PKM OS=Homo sapiens GN=PKM PE=1 SV=4	KPYM_HUMAN	PKM	58 kDa	NA	6800800	270250	0	556880	7	1	0	2
125	Poly(rC)-binding protein 1 OS=Homo sapiens GN=PCBP1 PE=1 SV=2	PCBP1_HUMAN	PCBP1	37 kDa	TRUE	3637900	1002500	4992600	2462700	2	2	2	1
126	40S ribosomal protein S26 OS=Homo sapiens GN=RPS26 PE=1 SV=3	RS26_HUMAN	RPS26	13 kDa	NA	1380600	977160	7873600	10900000	3	3	3	3
127	40S ribosomal protein S7 OS=Homo sapiens GN=RPS7 PE=1 SV=1	RS7_HUMAN	RPS7	22 kDa	NA	1221300	2058900	6141800	3521700	2	4	6	4
128	Cluster of 14-3-3 protein zeta/delta OS=Homo sapiens GN=YWHAZ PE=1 SV=1 (1433Z_HUMAN)	1433Z_HUMAN [5]	YWHAZ	28 kDa	TRUE	633010	0	0	0	4	0	0	0
129	60S ribosomal protein L24 OS=Homo sapiens GN=RPL24 PE=1 SV=1	C9JNW5_HUMAN (+2)	RPL24	18 kDa	NA	2039400	2392700	3521700	4223300	3	3	4	4
130	40S ribosomal protein S27 OS=Homo sapiens GN=RPS27 PE=1 SV=3	RS27_HUMAN	RPS27	9 kDa	NA	5618900	4398100	5226400	9612400	4	4	3	4
131	Cluster of Histone H1.2 OS=Homo sapiens GN=HIST1H1C PE=1 SV=2 (H12_HUMAN)	H12_HUMAN	HIST1H1C	21 kDa	TRUE	7477100	1357800	5365200	4391400	7	3	8	5
132	Ribosome biogenesis protein BRX1 homolog OS=Homo sapiens GN=BRIX1 PE=1 SV=2	BRX1_HUMAN	BRIX1	41 kDa	NA	6501600	0	0	1948600	6	0	0	4
133	L-lactate dehydrogenase B chain OS=Homo sapiens GN=LDHB PE=1 SV=2	LDHB_HUMAN	LDHB	37 kDa	TRUE	8031900	0	0	0	9	0	0	0
134	60S ribosomal protein L10 OS=Homo sapiens GN=RPL10 PE=1 SV=4	RL10_HUMAN (+1)	RPL10	25 kDa	NA	3007300	0	7928300	5732100	3	0	3	4
135	Large neutral amino acids transporter small subunit 1 OS=Homo sapiens GN=SLC7A5 PE=1 SV=2	LAT1_HUMAN	SLC7A5	55 kDa	NA	3375700	3126000	3709300	3082000	4	3	3	4
136	60S ribosomal protein L31 OS=Homo sapiens GN=RPL31 PE=1 SV=1	RL31_HUMAN	RPL31	14 kDa	NA	2640200	546110	2714600	4932200	4	1	2	5
137	Cluster of Polyadenylate-binding protein 1 OS=Homo sapiens GN=PABPC1 PE=1 SV=2 (PABP1_HUMAN)	PABP1_HUMAN [3]	PABPC1	71 kDa	TRUE	445860	0	0	0	2	0	0	0
138	60S ribosomal protein L27a OS=Homo sapiens GN=RPL27A PE=1 SV=1	E9PLL6_HUMAN (+1)	RPL27A	12 kDa	NA	3222000	1108000	4503400	4911900	5	2	4	4
139	Transgelin-2 OS=Homo sapiens GN=TAGLN2 PE=1 SV=3	TAGL2_HUMAN (+1)	TAGLN2	22 kDa	NA	1812400	0	0	0	3	0	0	0
140	Nuclear pore complex protein Nup88 OS=Homo sapiens GN=NUP88 PE=1 SV=2	NUP88_HUMAN	NUP88	84 kDa	NA	1243800	2009800	2144200	597220	4	5	5	2
141	60S ribosomal protein L23a OS=Homo sapiens GN=RPL23A PE=1 SV=1	RL23A_HUMAN	RPL23A	18 kDa	NA	3336000	465800	1074200	4612400	6	1	1	6
142	L-lactate dehydrogenase A chain OS=Homo sapiens GN=LDHA PE=1 SV=2	LDHA_HUMAN	LDHA	37 kDa	TRUE	5370000	0	0	0	5	0	0	0
143	Lamin-B2 OS=Homo sapiens GN=LMNB2 PE=1 SV=4	LMNB2_HUMAN	LMNB2	70 kDa	TRUE	0	0	10800000	8150500	0	0	11	8
144	40S ribosomal protein S4, X isoform OS=Homo sapiens GN=RPS4X PE=1 SV=2	RS4X_HUMAN	RPS4X	30 kDa	NA	1304700	335120	284370	2385800	4	2	2	4
145	Cofilin-1 OS=Homo sapiens GN=CFL1 PE=1 SV=3	COF1_HUMAN	CFL1	19 kDa	NA	3870800	0	1106700	1651900	5	0	2	2
146	Myosin light polypeptide 6 OS=Homo sapiens GN=MYL6 PE=1 SV=1	B7Z6Z4_HUMAN (+5)	MYL6	27 kDa	NA	760560	1054800	1693700	935640	2	4	3	2
147	CON__P01966	CON__P01966	CON__P01966	?	NA	1984500	2027200	5545800	1792700	2	2	3	2
148	Protein disulfide-isomerase OS=Homo sapiens GN=P4HB PE=1 SV=2	H7BZ94_HUMAN (+1)	P4HB	53 kDa	NA	1264400	0	561970	662250	4	0	2	2
149	Plasminogen activator inhibitor 1 RNA-binding protein OS=Homo sapiens GN=SERBP1 PE=1 SV=2	PAIRB_HUMAN	SERBP1	45 kDa	NA	1918300	0	1005900	843090	7	0	3	2
150	Ubiquitin-40S ribosomal protein S27a OS=Homo sapiens GN=RPS27A PE=1 SV=2	RS27A_HUMAN	RPS27A	18 kDa	NA	9352800	4203900	4974100	6339100	3	2	1	4
151	Cluster of ADP-ribosylation factor 4 OS=Homo sapiens GN=ARF4 PE=1 SV=3 (ARF4_HUMAN)	ARF4_HUMAN [5]	ARF4	21 kDa	TRUE	302520	296980	486580	0	1	1	1	0
152	Sarcoplasmic/endoplasmic reticulum calcium ATPase 2 OS=Homo sapiens GN=ATP2A2 PE=1 SV=1	AT2A2_HUMAN	ATP2A2	115 kDa	NA	823960	0	623450	0	2	0	3	0
153	Heterogeneous nuclear ribonucleoproteins C1/C2 OS=Homo sapiens GN=HNRNPC PE=1 SV=1	B2R5W2_HUMAN (+6)	HNRNPC	32 kDa	NA	2081200	1378500	365350	482300	5	4	1	1
154	GTP-binding nuclear protein Ran OS=Homo sapiens GN=RAN PE=1 SV=1	B5MDF5_HUMAN (+1)	RAN	26 kDa	NA	2992400	0	0	1332000	6	0	0	4
155	Hornerin OS=Homo sapiens GN=HRNR PE=1 SV=2	HORN_HUMAN (+1)	HRNR	282 kDa	NA	3716600	2630100	0	654730	5	3	0	1
156	Polypyrimidine tract-binding protein 1 OS=Homo sapiens GN=PTBP1 PE=1 SV=1	A0A0U1RRM4_HUMAN (+2)	PTBP1	62 kDa	NA	1439200	0	0	0	4	0	0	0
157	Emerin OS=Homo sapiens GN=EMD PE=1 SV=1	EMD_HUMAN	EMD	29 kDa	NA	0	186390	2154800	1723900	0	1	5	4
158	Core histone macro-H2A.1 OS=Homo sapiens GN=H2AFY PE=1 SV=4	H2AY_HUMAN	H2AFY	40 kDa	NA	3538500	0	0	3554500	6	0	0	6
159	60S ribosomal protein L29 OS=Homo sapiens GN=RPL29 PE=1 SV=2	RL29_HUMAN	RPL29	18 kDa	NA	11100000	0	1145500	14600000	5	0	2	3
160	Zinc finger protein 90 OS=Homo sapiens GN=ZNF90 PE=4 SV=2	A0A087WZ27_HUMAN (+2)	ZNF90	14 kDa	NA	2852500	0	1143900	1698500	5	0	1	2
161	40S ribosomal protein S3a OS=Homo sapiens GN=RPS3A PE=1 SV=1	D6RAT0_HUMAN (+1)	RPS3A	26 kDa	NA	2271900	0	0	1172600	5	0	0	3
162	DnaJ homolog subfamily A member 1 OS=Homo sapiens GN=DNAJA1 PE=1 SV=2	DNJA1_HUMAN	DNAJA1	45 kDa	NA	0	0	515000	3640800	0	0	1	2
163	40S ribosomal protein S5 (Fragment) OS=Homo sapiens GN=RPS5 PE=1 SV=1	M0R0F0_HUMAN (+1)	RPS5	22 kDa	NA	4315900	0	0	5183000	5	0	0	4
164	60S ribosomal protein L36 OS=Homo sapiens GN=RPL36 PE=1 SV=3	RL36_HUMAN	RPL36	12 kDa	NA	7050800	0	0	4902600	3	0	0	3
165	D-3-phosphoglycerate dehydrogenase OS=Homo sapiens GN=PHGDH PE=1 SV=4	SERA_HUMAN	PHGDH	57 kDa	NA	679580	1206500	0	285060	2	5	0	2
166	SWI/SNF-related matrix-associated actin-dependent regulator of chromatin subfamily A member 5 OS=Homo sapiens GN=SMARCA5 PE=1 SV=1	SMCA5_HUMAN	SMARCA5	122 kDa	NA	602760	93620	0	406580	4	1	0	2
167	Translocon-associated protein subunit delta OS=Homo sapiens GN=SSR4 PE=1 SV=1	SSRD_HUMAN	SSR4	19 kDa	NA	423210	626230	1476200	1058700	1	2	2	2
168	T-complex protein 1 subunit alpha OS=Homo sapiens GN=TCP1 PE=1 SV=1	TCPA_HUMAN	TCP1	60 kDa	NA	770040	0	0	0	4	0	0	0
169	DNA topoisomerase 2-alpha OS=Homo sapiens GN=TOP2A PE=1 SV=3	TOP2A_HUMAN	TOP2A	174 kDa	NA	1026900	0	0	562040	5	0	0	2
170	Ribosomal protein L19 OS=Homo sapiens GN=RPL19 PE=1 SV=1	J3KTE4_HUMAN (+2)	RPL19	23 kDa	NA	1270100	1769700	2235600	2700100	2	2	3	3
171	Ras-related protein Rab-7a OS=Homo sapiens GN=RAB7A PE=1 SV=1	RAB7A_HUMAN	RAB7A	23 kDa	NA	0	0	669920	0	0	0	2	0
172	60S ribosomal protein L36a-like OS=Homo sapiens GN=RPL36AL PE=1 SV=3	RL36L_HUMAN	RPL36AL	12 kDa	NA	1279600	0	1744600	5086400	3	0	2	3
173	Heterogeneous nuclear ribonucleoprotein F OS=Homo sapiens GN=HNRNPF PE=1 SV=3	HNRPF_HUMAN	HNRNPF	46 kDa	TRUE	3847800	0	3496600	3537900	2	0	1	2
174	Transketolase OS=Homo sapiens GN=TKT PE=1 SV=3	TKT_HUMAN	TKT	68 kDa	NA	1016300	0	0	0	5	0	0	0
175	cDNA FLJ60124, highly similar to Mitochondrial dicarboxylate carrier OS=Homo sapiens PE=2 SV=1	B4DLN1_HUMAN	B4DLN1_HUMAN	48 kDa	NA	293740	0	1833000	0	2	0	4	0
176	DNA replication licensing factor MCM7 OS=Homo sapiens GN=MCM7 PE=1 SV=4	MCM7_HUMAN	MCM7	81 kDa	NA	765250	132770	1225900	0	3	1	4	0
177	RNA-binding protein FUS OS=Homo sapiens GN=FUS PE=1 SV=1	FUS_HUMAN	FUS	53 kDa	NA	0	0	0	0	0	0	0	0
178	60S ribosomal protein L22 OS=Homo sapiens GN=RPL22 PE=1 SV=2	RL22_HUMAN	RPL22	15 kDa	NA	1105700	2052200	3632900	2156700	2	2	2	2
179	Coatomer subunit beta OS=Homo sapiens GN=COPB1 PE=1 SV=3	COPB_HUMAN	COPB1	107 kDa	NA	1198100	0	0	0	4	0	0	0
180	60S ribosomal protein L26 (Fragment) OS=Homo sapiens GN=RPL26 PE=4 SV=8	J3KTJ8_HUMAN (+5)	RPL26	11 kDa	NA	1302400	0	321400	2526200	3	0	1	4
181	Nucleolin OS=Homo sapiens GN=NCL PE=1 SV=3	NUCL_HUMAN	NCL	77 kDa	NA	1828300	0	0	2431000	6	0	0	5
182	Ras-related protein Rab-1A OS=Homo sapiens GN=RAB1A PE=1 SV=1	E7END7_HUMAN (+1)	RAB1A	19 kDa	NA	753400	721020	0	0	1	1	0	0
183	60S acidic ribosomal protein P1 OS=Homo sapiens GN=RPLP1 PE=1 SV=1	RLA1_HUMAN	RPLP1	12 kDa	NA	50000000	0	3511400	10500000	2	0	1	2
184	Importin-5 (Fragment) OS=Homo sapiens GN=IPO5 PE=1 SV=1	H0Y8C6_HUMAN (+1)	IPO5	124 kDa	NA	0	0	0	0	0	0	0	0
185	Histone H2A.V OS=Homo sapiens GN=H2AFV PE=1 SV=3	H2AV_HUMAN (+1)	H2AFV	14 kDa	TRUE	47400000	116600	14700000	62800000	3	1	1	2
186	Keratinocyte proline-rich protein OS=Homo sapiens GN=KPRP PE=1 SV=1	KPRP_HUMAN	KPRP	64 kDa	NA	7321700	0	0	0	8	0	0	0
187	Desmoplakin OS=Homo sapiens GN=DSP PE=1 SV=3	DESP_HUMAN	DSP	332 kDa	NA	2428400	132620	0	0	9	2	0	0
188	Nucleoside diphosphate kinase A OS=Homo sapiens GN=NME1 PE=1 SV=1	NDKA_HUMAN	NME1	17 kDa	NA	0	0	0	0	0	0	0	0
189	Profilin-1 OS=Homo sapiens GN=PFN1 PE=1 SV=2	PROF1_HUMAN	PFN1	15 kDa	NA	2906200	0	0	0	2	0	0	0
190	Nuclease-sensitive element-binding protein 1 OS=Homo sapiens GN=YBX1 PE=1 SV=3	YBOX1_HUMAN	YBX1	36 kDa	NA	3087900	0	0	0	5	0	0	0
191	Cysteine and glycine-rich protein 1 OS=Homo sapiens GN=CSRP1 PE=1 SV=3	CSRP1_HUMAN	CSRP1	21 kDa	NA	0	0	0	0	0	0	0	0
192	Nucleolar RNA helicase 2 OS=Homo sapiens GN=DDX21 PE=1 SV=5	DDX21_HUMAN	DDX21	87 kDa	NA	528280	0	0	2953200	2	0	0	6
193	THO complex subunit 4 OS=Homo sapiens GN=ALYREF PE=1 SV=3	THOC4_HUMAN	ALYREF	27 kDa	NA	927770	0	0	5718800	3	0	0	5
194	Heterogeneous nuclear ribonucleoprotein D0 (Fragment) OS=Homo sapiens GN=HNRNPD PE=1 SV=1	D6RAF8_HUMAN (+4)	HNRNPD	23 kDa	NA	584340	0	0	0	2	0	0	0
195	40S ribosomal protein S20 OS=Homo sapiens GN=RPS20 PE=1 SV=1	RS20_HUMAN	RPS20	13 kDa	NA	309090	0	820410	562400	1	0	1	1
196	Annexin A1 OS=Homo sapiens GN=ANXA1 PE=1 SV=2	ANXA1_HUMAN	ANXA1	39 kDa	NA	0	0	0	0	0	0	0	0
197	T-complex protein 1 subunit beta OS=Homo sapiens GN=CCT2 PE=1 SV=2	F5GWF6_HUMAN (+2)	CCT2	57 kDa	NA	805210	0	0	0	4	0	0	0
198	tRNA (cytosine(34)-C(5))-methyltransferase OS=Homo sapiens GN=NSUN2 PE=1 SV=2	NSUN2_HUMAN	NSUN2	86 kDa	NA	0	0	278250	140390	0	0	2	1
199	Protein disulfide-isomerase A3 OS=Homo sapiens GN=PDIA3 PE=1 SV=4	PDIA3_HUMAN	PDIA3_HUMAN	57 kDa	TRUE	2901500	0	0	0	7	0	0	0
200	Thioredoxin OS=Homo sapiens GN=TXN PE=1 SV=3	THIO_HUMAN	TXN	12 kDa	NA	0	136360	0	0	0	1	0	0
201	Putative RNA-binding protein Luc7-like 2 OS=Homo sapiens GN=LUC7L2 PE=4 SV=1	A0A0A6YYJ8_HUMAN (+1)	LUC7L2	54 kDa	NA	833910	235270	0	243290	3	1	0	2
202	60S ribosomal protein L37a OS=Homo sapiens GN=RPL37A PE=1 SV=1	C9J4Z3_HUMAN (+1)	RPL37A	8 kDa	NA	194040	0	0	1410600	1	0	0	3
203	T-complex protein 1 subunit gamma OS=Homo sapiens GN=CCT3 PE=1 SV=4	TCPG_HUMAN	CCT3	61 kDa	NA	583400	0	0	0	3	0	0	0
204	Mitochondrial import inner membrane translocase subunit TIM50 (Fragment) OS=Homo sapiens GN=TIMM50 PE=1 SV=1	M0R003_HUMAN (+1)	TIMM50	28 kDa	NA	0	0	274520	0	0	0	1	0
205	Aminoacyl tRNA synthase complex-interacting multifunctional protein 2 OS=Homo sapiens GN=AIMP2 PE=1 SV=2	AIMP2_HUMAN	AIMP2	35 kDa	NA	971700	1026000	341200	845840	2	2	1	2
206	40S ribosomal protein S17 OS=Homo sapiens GN=RPS17 PE=1 SV=2	RS17_HUMAN	RPS17	16 kDa	NA	740490	0	0	832610	2	0	0	2
207	CON__P13646-1	CON__P13646-1	CON__P13646-1	?	TRUE	0	0	0	0	0	0	0	0
208	Eukaryotic translation initiation factor 5A (Fragment) OS=Homo sapiens GN=EIF5A PE=1 SV=8	I3L397_HUMAN (+2)	EIF5A	16 kDa	NA	0	0	0	0	0	0	0	0
209	Peptidyl-prolyl cis-trans isomerase A OS=Homo sapiens GN=PPIA PE=1 SV=2	PPIA_HUMAN	PPIA	18 kDa	NA	2876300	0	0	0	5	0	0	0
210	Transforming protein RhoA OS=Homo sapiens GN=RHOA PE=1 SV=1	RHOA_HUMAN	RHOA	22 kDa	NA	0	0	0	0	0	0	0	0
211	40S ribosomal protein S18 OS=Homo sapiens GN=RPS18 PE=1 SV=3	RS18_HUMAN	RPS18	18 kDa	NA	2119600	0	0	1293900	5	0	0	3
212	Pre-mRNA 3'-end-processing factor FIP1 OS=Homo sapiens GN=FIP1L1 PE=1 SV=1	FIP1_HUMAN	FIP1L1	67 kDa	NA	0	1717300	814650	990880	0	3	1	2
213	S-adenosylmethionine synthase isoform type-2 OS=Homo sapiens GN=MAT2A PE=1 SV=1	METK2_HUMAN	MAT2A	44 kDa	NA	0	0	0	316460	0	1	0	1
214	CTP synthase 1 OS=Homo sapiens GN=CTPS1 PE=1 SV=2	PYRG1_HUMAN	CTPS1	67 kDa	NA	0	0	0	0	0	0	1	0
215	Transcription factor Dp-2 (Fragment) OS=Homo sapiens GN=TFDP2 PE=4 SV=1	H7C5C2_HUMAN (+1)	TFDP2	13 kDa	NA	0	0	0	0	0	0	0	0
216	Ribonucleoside-diphosphate reductase large subunit OS=Homo sapiens GN=RRM1 PE=1 SV=1	RIR1_HUMAN	RRM1	90 kDa	NA	0	0	0	0	0	0	0	0
217	Serine-threonine kinase receptor-associated protein OS=Homo sapiens GN=STRAP PE=1 SV=1	STRAP_HUMAN	STRAP	38 kDa	NA	0	0	0	0	0	0	0	0
218	Aspartate--tRNA ligase, cytoplasmic OS=Homo sapiens GN=DARS PE=1 SV=2	SYDC_HUMAN	DARS	57 kDa	NA	338460	217550	0	0	2	3	0	0
219	Lanosterol 14-alpha demethylase OS=Homo sapiens GN=CYP51A1 PE=1 SV=1	A0A0C4DFL7_HUMAN (+1)	CYP51A1	57 kDa	NA	314360	851130	1071200	434830	1	3	2	1
220	SAFB-like transcription modulator OS=Homo sapiens GN=SLTM PE=1 SV=2	SLTM_HUMAN	SLTM	117 kDa	NA	458520	0	1155500	853180	1	0	3	2
221	ATP-dependent RNA helicase DDX39A OS=Homo sapiens GN=DDX39A PE=1 SV=2	DX39A_HUMAN (+1)	DDX39A	49 kDa	NA	0	0	551260	0	0	0	2	0
222	40S ribosomal protein S25 OS=Homo sapiens GN=RPS25 PE=1 SV=1	RS25_HUMAN	RPS25	14 kDa	NA	494440	0	0	973290	1	0	0	2
223	Heterogeneous nuclear ribonucleoprotein A0 OS=Homo sapiens GN=HNRNPA0 PE=1 SV=1	ROA0_HUMAN	HNRNPA0	31 kDa	NA	0	0	0	0	0	0	0	0
224	Matrin-3 OS=Homo sapiens GN=MATR3 PE=1 SV=1	A0A0R4J2E8_HUMAN (+2)	MATR3	95 kDa	NA	625460	202430	0	0	2	2	0	0
225	Protein transport protein Sec61 subunit alpha isoform 1 OS=Homo sapiens GN=SEC61A1 PE=1 SV=1	B4DR61_HUMAN (+1)	SEC61A1	53 kDa	NA	352660	429620	406740	0	1	2	1	0
226	Microtubule-associated protein OS=Homo sapiens GN=MAP4 PE=1 SV=1	E7EVA0_HUMAN (+1)	MAP4	245 kDa	NA	0	0	0	0	0	0	0	0
227	Probable rRNA-processing protein EBP2 OS=Homo sapiens GN=EBNA1BP2 PE=1 SV=2	EBP2_HUMAN (+1)	EBNA1BP2	35 kDa	NA	534180	0	0	263630	2	0	0	2
228	Endoplasmin OS=Homo sapiens GN=HSP90B1 PE=1 SV=1	ENPL_HUMAN	HSP90B1	92 kDa	TRUE	3485700	0	0	0	6	0	0	0
229	Peroxiredoxin-2 OS=Homo sapiens GN=PRDX2 PE=1 SV=5	PRDX2_HUMAN	PRDX2	22 kDa	TRUE	0	0	0	0	0	0	0	0
230	T-complex protein 1 subunit zeta OS=Homo sapiens GN=CCT6A PE=1 SV=3	TCPZ_HUMAN	CCT6A	58 kDa	NA	0	0	0	0	0	0	0	0
231	Atrial natriuretic peptide receptor 3 OS=Homo sapiens GN=NPR3 PE=1 SV=2	ANPRC_HUMAN	NPR3	60 kDa	NA	0	593540	2134800	0	0	2	4	0
232	Metallothionein-1G OS=Homo sapiens GN=MT1G PE=1 SV=2	MT1G_HUMAN (+2)	MT1G	6 kDa	NA	0	0	0	0	0	0	0	0
233	Programmed cell death 6-interacting protein OS=Homo sapiens GN=PDCD6IP PE=1 SV=1	PDC6I_HUMAN	PDCD6IP	96 kDa	NA	0	0	0	0	0	0	0	0
234	Isoleucine--tRNA ligase, cytoplasmic OS=Homo sapiens GN=IARS PE=1 SV=1	J3KR24_HUMAN (+1)	IARS	132 kDa	NA	0	262680	0	0	0	2	0	0
235	Mitochondrial 2-oxoglutarate/malate carrier protein (Fragment) OS=Homo sapiens GN=SLC25A11 PE=1 SV=1	I3L1P8_HUMAN (+1)	SLC25A11	32 kDa	NA	533680	0	1336500	439180	1	1	1	1
236	Eukaryotic translation initiation factor 3 subunit A OS=Homo sapiens GN=EIF3A PE=1 SV=1	EIF3A_HUMAN	EIF3A	167 kDa	NA	0	476930	0	0	0	2	0	0
237	Monocarboxylate transporter 1 OS=Homo sapiens GN=SLC16A1 PE=1 SV=3	MOT1_HUMAN	SLC16A1	54 kDa	NA	371970	0	702290	693440	1	0	1	1
238	Annexin A7 OS=Homo sapiens GN=ANXA7 PE=1 SV=3	ANXA7_HUMAN	ANXA7	53 kDa	NA	0	0	0	0	0	0	0	0
239	Cytochrome c-type heme lyase OS=Homo sapiens GN=HCCS PE=1 SV=1	CCHL_HUMAN	HCCS	31 kDa	NA	0	0	0	0	0	0	0	0
240	T-complex protein 1 subunit epsilon OS=Homo sapiens GN=CCT5 PE=1 SV=1	E7ENZ3_HUMAN (+1)	CCT5	54 kDa	NA	1320700	0	0	0	4	0	0	0
241	Elongation factor 1-gamma OS=Homo sapiens GN=EEF1G PE=1 SV=3	EF1G_HUMAN	EEF1G	50 kDa	NA	3813600	0	0	0	6	0	0	0
242	Keratin, type II cytoskeletal 1b OS=Homo sapiens GN=KRT77 PE=2 SV=3	K2C1B_HUMAN (+1)	KRT77	62 kDa	TRUE	87400000	0	0	0	8	0	0	0
243	Tropomyosin alpha-3 chain OS=Homo sapiens GN=TPM3 PE=1 SV=2	Q5VU61_HUMAN	TPM3	26 kDa	NA	327660	0	0	0	1	0	0	0
244	Nuclear mitotic apparatus protein 1 OS=Homo sapiens GN=NUMA1 PE=1 SV=2	NUMA1_HUMAN	NUMA1	238 kDa	NA	350790	0	0	0	3	0	0	0
245	Calcyclin-binding protein OS=Homo sapiens GN=CACYBP PE=1 SV=2	CYBP_HUMAN	CACYBP	26 kDa	NA	0	0	0	0	0	0	0	0
246	Apoptosis-inducing factor 1, mitochondrial OS=Homo sapiens GN=AIFM1 PE=1 SV=1	AIFM1_HUMAN	AIFM1	67 kDa	NA	0	0	0	0	0	0	0	0
247	Putative eukaryotic translation initiation factor 2 subunit 3-like protein OS=Homo sapiens GN=EIF2S3L PE=5 SV=2	IF2GL_HUMAN (+1)	EIF2S3L	51 kDa	NA	0	0	0	0	0	0	0	0
248	T-complex protein 1 subunit delta OS=Homo sapiens GN=CCT4 PE=1 SV=4	TCPD_HUMAN	CCT4	58 kDa	NA	410420	0	0	0	3	0	0	0
249	Chromatin assembly factor 1 subunit A OS=Homo sapiens GN=CHAF1A PE=1 SV=2	CAF1A_HUMAN	CHAF1A	107 kDa	NA	0	1100900	1747800	0	0	2	3	0
250	Cell division control protein 42 homolog OS=Homo sapiens GN=CDC42 PE=1 SV=2	CDC42_HUMAN	CDC42	21 kDa	NA	0	0	0	0	0	0	0	0
251	Protein S100-A11 OS=Homo sapiens GN=S100A11 PE=1 SV=2	S10AB_HUMAN	S100A11	12 kDa	NA	0	0	0	0	0	0	0	0
252	Src substrate cortactin OS=Homo sapiens GN=CTTN PE=1 SV=2	SRC8_HUMAN	CTTN	62 kDa	NA	0	0	0	0	0	0	0	0
253	Peroxiredoxin-4 OS=Homo sapiens GN=PRDX4 PE=1 SV=1	PRDX4_HUMAN	PRDX4	31 kDa	TRUE	736480	0	1417600	0	1	0	1	1
254	Cytoplasmic dynein 1 heavy chain 1 OS=Homo sapiens GN=DYNC1H1 PE=1 SV=5	DYHC1_HUMAN	DYNC1H1	532 kDa	NA	389280	0	0	0	2	0	0	0
255	ATP-dependent RNA helicase A OS=Homo sapiens GN=DHX9 PE=1 SV=4	DHX9_HUMAN	DHX9	141 kDa	NA	1124300	0	0	0	5	0	0	0
256	40S ribosomal protein S19 OS=Homo sapiens GN=RPS19 PE=1 SV=2	RS19_HUMAN	RPS19	16 kDa	NA	1252100	0	0	0	4	0	0	0
257	Anterior gradient protein 2 homolog OS=Homo sapiens GN=AGR2 PE=1 SV=1	AGR2_HUMAN	AGR2	20 kDa	NA	0	0	0	0	0	0	0	0
258	Ras-related protein Rab-14 OS=Homo sapiens GN=RAB14 PE=1 SV=4	RAB14_HUMAN	RAB14	24 kDa	NA	0	0	0	0	0	0	0	0
259	Splicing factor 3A subunit 1 OS=Homo sapiens GN=SF3A1 PE=1 SV=1	SF3A1_HUMAN	SF3A1	89 kDa	NA	0	0	1172700	0	0	0	2	0
260	Creatine kinase B-type OS=Homo sapiens GN=CKB PE=1 SV=1	KCRB_HUMAN	CKB	43 kDa	NA	426270	0	0	0	2	0	0	0
261	Bromodomain adjacent to zinc finger domain protein 2B OS=Homo sapiens GN=BAZ2B PE=1 SV=3	BAZ2B_HUMAN	BAZ2B	240 kDa	NA	0	426990	105840	0	0	3	1	0
262	60S ribosomal protein L35 OS=Homo sapiens GN=RPL35 PE=1 SV=1	F2Z388_HUMAN (+1)	RPL35	11 kDa	NA	272760	208540	0	1268500	1	1	0	2
263	Pinin OS=Homo sapiens GN=PNN PE=1 SV=4	PININ_HUMAN	PNN	82 kDa	NA	0	0	136700	397980	0	0	1	2
264	Serine/arginine repetitive matrix protein 2 OS=Homo sapiens GN=SRRM2 PE=1 SV=2	SRRM2_HUMAN	SRRM2	300 kDa	NA	0	120250	0	0	0	2	0	0
265	Cytochrome c oxidase subunit 4 isoform 1, mitochondrial OS=Homo sapiens GN=COX4I1 PE=1 SV=1	COX41_HUMAN	COX4I1	20 kDa	NA	0	0	0	0	0	0	0	0
266	40S ribosomal protein S12 OS=Homo sapiens GN=RPS12 PE=1 SV=3	RS12_HUMAN	RPS12	15 kDa	NA	0	0	0	0	0	0	0	0
267	ATP synthase subunit gamma, mitochondrial OS=Homo sapiens GN=ATP5C1 PE=1 SV=1	ATPG_HUMAN	ATP5C1	33 kDa	NA	0	0	0	283790	0	0	0	1
268	Enhancer of rudimentary homolog OS=Homo sapiens GN=ERH PE=1 SV=1	ERH_HUMAN (+1)	ERH	12 kDa	NA	299230	0	475700	383360	1	0	1	1
269	Beta-2-microglobulin OS=Homo sapiens GN=B2M PE=1 SV=1	B2MG_HUMAN (+2)	B2M	14 kDa	NA	415810	489440	0	0	1	1	0	0
270	sp|P61966|AP1S1_HUMAN	AP1S1_HUMAN-DECOY	AP1S1_HUMAN-DECOY	?	NA	0	1501700	0	0	0	1	0	0
271	Protein Shroom3 OS=Homo sapiens GN=SHROOM3 PE=1 SV=2	SHRM3_HUMAN	SHROOM3	217 kDa	NA	0	0	3021100	0	0	0	1	0
272	Heterogeneous nuclear ribonucleoprotein L OS=Homo sapiens GN=HNRNPL PE=1 SV=2	HNRPL_HUMAN (+1)	HNRNPL	64 kDa	NA	307090	0	0	0	1	0	0	0
273	Eukaryotic translation initiation factor 3 subunit I OS=Homo sapiens GN=EIF3I PE=1 SV=1	EIF3I_HUMAN (+1)	EIF3I	37 kDa	NA	0	0	0	0	0	0	0	0
274	Alpha-enolase OS=Homo sapiens GN=ENO1 PE=1 SV=2	ENOA_HUMAN	ENO1	47 kDa	NA	3570900	0	0	0	5	0	0	0
275	Semenogelin-1 OS=Homo sapiens GN=SEMG1 PE=1 SV=2	SEMG1_HUMAN	SEMG1	52 kDa	TRUE	0	0	0	6399000	0	0	0	6
276	Semenogelin-2 OS=Homo sapiens GN=SEMG2 PE=1 SV=1	SEMG2_HUMAN	SEMG2	65 kDa	TRUE	0	0	0	6079200	0	0	0	5
277	ADP-ribosylation factor-like protein 6-interacting protein 4 OS=Homo sapiens GN=ARL6IP4 PE=1 SV=1	A0A0C4DG62_HUMAN (+4)	ARL6IP4	25 kDa	NA	1318000	0	0	0	3	0	0	0
278	LIM and SH3 domain protein 1 (Fragment) OS=Homo sapiens GN=LASP1 PE=1 SV=1	C9J9W2_HUMAN (+1)	LASP1	19 kDa	NA	0	0	0	0	0	0	0	0
279	Corepressor interacting with RBPJ 1 OS=Homo sapiens GN=CIR1 PE=1 SV=1	CIR1_HUMAN	CIR1	52 kDa	NA	0	503270	0	0	0	3	0	0
280	ATP-citrate synthase OS=Homo sapiens GN=ACLY PE=1 SV=3	ACLY_HUMAN	ACLY	121 kDa	NA	0	0	0	0	0	0	0	0
281	Ras-related protein Rab-5C OS=Homo sapiens GN=RAB5C PE=1 SV=2	RAB5C_HUMAN	RAB5C	23 kDa	NA	0	0	0	0	0	1	0	0
282	Heterogeneous nuclear ribonucleoprotein Q OS=Homo sapiens GN=SYNCRIP PE=1 SV=2	HNRPQ_HUMAN	SYNCRIP	70 kDa	NA	0	0	0	0	0	0	0	0
283	Solute carrier family 2, facilitated glucose transporter member 1 OS=Homo sapiens GN=SLC2A1 PE=1 SV=2	GTR1_HUMAN	SLC2A1	54 kDa	NA	0	0	1071800	854350	0	0	1	1
284	Nucleolar GTP-binding protein 1 OS=Homo sapiens GN=GTPBP4 PE=1 SV=3	NOG1_HUMAN	GTPBP4	74 kDa	NA	309170	0	0	0	2	0	0	1
285	CAD protein OS=Homo sapiens GN=CAD PE=1 SV=1	F8VPD4_HUMAN (+1)	CAD	236 kDa	NA	145230	0	0	0	2	0	0	0
286	RNA-binding protein EWS OS=Homo sapiens GN=EWSR1 PE=1 SV=1	B0QYK0_HUMAN (+1)	EWSR1	65 kDa	NA	0	0	0	0	0	0	0	0
287	Neutral amino acid transporter B(0) OS=Homo sapiens GN=SLC1A5 PE=1 SV=2	AAAT_HUMAN	SLC1A5	57 kDa	NA	0	0	0	0	0	0	0	0
288	Neuroblast differentiation-associated protein AHNAK OS=Homo sapiens GN=AHNAK PE=1 SV=2	AHNK_HUMAN	AHNAK	629 kDa	NA	808440	0	0	0	2	0	0	0
289	Eukaryotic translation initiation factor 4B OS=Homo sapiens GN=EIF4B PE=1 SV=1	E7EX17_HUMAN (+1)	EIF4B	70 kDa	NA	0	0	0	0	0	0	0	0
290	Heterogeneous nuclear ribonucleoprotein A3 OS=Homo sapiens GN=HNRNPA3 PE=1 SV=2	ROA3_HUMAN	HNRNPA3	40 kDa	NA	844760	0	0	0	2	0	0	0
291	Transcription intermediary factor 1-beta OS=Homo sapiens GN=TRIM28 PE=1 SV=5	TIF1B_HUMAN	TRIM28	89 kDa	NA	1622200	0	0	0	2	0	0	0
292	Calnexin OS=Homo sapiens GN=CANX PE=1 SV=2	CALX_HUMAN	CANX	68 kDa	NA	0	0	0	0	0	0	0	0
293	3-beta-hydroxysteroid-Delta(8),Delta(7)-isomerase OS=Homo sapiens GN=EBP PE=1 SV=3	EBP_HUMAN	EBP	26 kDa	NA	0	90982	159770	137800	0	1	1	1
294	Triosephosphate isomerase OS=Homo sapiens GN=TPI1 PE=1 SV=3	TPIS_HUMAN	TPI1	31 kDa	NA	1801300	0	0	0	4	0	0	0
295	40S ribosomal protein S10 OS=Homo sapiens GN=RPS10 PE=1 SV=1	RS10_HUMAN	RPS10	19 kDa	NA	1096200	0	0	0	3	0	0	0
296	RNA-binding protein with serine-rich domain 1 (Fragment) OS=Homo sapiens GN=RNPS1 PE=1 SV=1	H3BMM9_HUMAN (+4)	RNPS1	32 kDa	NA	0	0	0	978030	0	0	0	2
297	Glutathione S-transferase Mu 3 OS=Homo sapiens GN=GSTM3 PE=1 SV=3	GSTM3_HUMAN	GSTM3	27 kDa	NA	0	0	0	0	0	0	0	0
298	Heat shock protein 75 kDa, mitochondrial OS=Homo sapiens GN=TRAP1 PE=1 SV=3	TRAP1_HUMAN	TRAP1	80 kDa	NA	941240	0	0	0	3	0	0	0
299	OCIA domain-containing protein 1 (Fragment) OS=Homo sapiens GN=OCIAD1 PE=1 SV=1	D6RG39_HUMAN (+2)	OCIAD1	19 kDa	NA	0	0	0	0	0	0	0	0
300	T-complex protein 1 subunit theta OS=Homo sapiens GN=CCT8 PE=1 SV=4	TCPQ_HUMAN	CCT8	60 kDa	NA	580760	0	0	0	2	0	0	0
301	Receptor of-activated protein C kinase 1 OS=Homo sapiens GN=RACK1 PE=1 SV=1	D6RAC2_HUMAN (+2)	RACK1	30 kDa	NA	1096000	0	0	0	2	0	0	0
302	Pachytene checkpoint protein 2 homolog OS=Homo sapiens GN=TRIP13 PE=1 SV=2	PCH2_HUMAN	TRIP13	49 kDa	NA	894470	0	0	0	1	0	0	0
303	Filaggrin-2 OS=Homo sapiens GN=FLG2 PE=1 SV=1	FILA2_HUMAN (+1)	FLG2	248 kDa	NA	1360500	0	0	0	2	0	0	0
304	RNA-binding protein 25 OS=Homo sapiens GN=RBM25 PE=1 SV=3	RBM25_HUMAN	RBM25	100 kDa	NA	286630	0	0	0	2	0	0	0
305	Mid1-interacting protein 1 OS=Homo sapiens GN=MID1IP1 PE=1 SV=1	M1IP1_HUMAN	MID1IP1	20 kDa	NA	0	0	0	0	0	0	0	0
306	Ribosome biogenesis protein NSA2 homolog OS=Homo sapiens GN=NSA2 PE=1 SV=1	NSA2_HUMAN	NSA2	30 kDa	NA	370970	0	0	0	2	0	0	0
307	Cytochrome c oxidase subunit 5B, mitochondrial OS=Homo sapiens GN=COX5B PE=1 SV=2	COX5B_HUMAN	COX5B	14 kDa	NA	0	0	0	0	0	0	0	0
308	Arginine--tRNA ligase, cytoplasmic OS=Homo sapiens GN=RARS PE=1 SV=2	SYRC_HUMAN	RARS	75 kDa	NA	723200	0	0	0	2	0	0	0
309	Chromobox protein homolog 3 OS=Homo sapiens GN=CBX3 PE=1 SV=4	CBX3_HUMAN	CBX3	21 kDa	NA	0	0	295990	0	0	0	1	0
310	Proliferation marker protein Ki-67 OS=Homo sapiens GN=MKI67 PE=1 SV=2	KI67_HUMAN	MKI67	359 kDa	NA	401820	0	0	186910	2	0	0	1
311	Protein disulfide-isomerase A3 (Fragment) OS=Homo sapiens GN=PDIA3 PE=1 SV=1	H7BZJ3_HUMAN	PDIA3	14 kDa	TRUE	987910	0	0	0	1	0	0	0
312	Protein SGT1 homolog OS=Homo sapiens GN=SUGT1 PE=1 SV=3	SGT1_HUMAN	SUGT1	41 kDa	NA	0	0	0	0	1	0	0	0
313	Glutamine--tRNA ligase OS=Homo sapiens GN=QARS PE=1 SV=1	SYQ_HUMAN	QARS	88 kDa	NA	0	0	0	0	1	0	0	0
314	Uncharacterized protein OS=Homo sapiens PE=4 SV=1	C9JAW5_HUMAN (+2)	C9JAW5_HUMAN (+2)	9 kDa	NA	348940	0	0	0	1	0	0	0
315	Voltage-dependent anion-selective channel protein 2 (Fragment) OS=Homo sapiens GN=VDAC2 PE=1 SV=1	A0A0A0MR02_HUMAN (+1)	VDAC2	30 kDa	NA	0	0	0	0	0	0	0	0
316	Annexin A11 OS=Homo sapiens GN=ANXA11 PE=1 SV=1	ANX11_HUMAN	ANXA11	54 kDa	NA	0	0	0	0	0	0	0	0
317	Keratin, type II cytoskeletal 4 OS=Homo sapiens GN=KRT4 PE=1 SV=4	K2C4_HUMAN (+1)	KRT4	57 kDa	TRUE	0	0	0	0	0	0	0	0
318	Ribosomal L1 domain-containing protein 1 (Fragment) OS=Homo sapiens GN=RSL1D1 PE=1 SV=1	J3QSV6_HUMAN (+1)	RSL1D1	48 kDa	NA	0	0	0	0	0	0	0	0
319	Carnitine O-palmitoyltransferase 1, liver isoform OS=Homo sapiens GN=CPT1A PE=1 SV=2	CPT1A_HUMAN	CPT1A	88 kDa	NA	0	0	0	0	0	0	0	0
320	RNA cytidine acetyltransferase OS=Homo sapiens GN=NAT10 PE=1 SV=2	NAT10_HUMAN	NAT10	116 kDa	NA	0	0	0	0	0	0	0	0
321	Glutamine--fructose-6-phosphate aminotransferase [isomerizing] 1 OS=Homo sapiens GN=GFPT1 PE=1 SV=3	GFPT1_HUMAN	GFPT1	79 kDa	NA	0	0	0	0	0	0	0	0
322	CON__P12763	CON__P12763	CON__P12763	?	NA	0	0	0	0	0	0	0	0
323	Nucleoprotein TPR OS=Homo sapiens GN=TPR PE=1 SV=3	TPR_HUMAN	TPR	267 kDa	NA	471600	0	0	0	2	0	0	0
324	Histone-binding protein RBBP4 OS=Homo sapiens GN=RBBP4 PE=1 SV=3	RBBP4_HUMAN	RBBP4	48 kDa	NA	0	0	0	0	0	0	0	0
325	Barrier-to-autointegration factor OS=Homo sapiens GN=BANF1 PE=1 SV=1	BAF_HUMAN	BANF1	10 kDa	NA	0	0	0	0	0	0	0	0
326	Programmed cell death protein 6 OS=Homo sapiens GN=PDCD6 PE=1 SV=1	PDCD6_HUMAN	PDCD6	22 kDa	NA	0	0	0	0	0	0	0	0
327	40S ribosomal protein S30 OS=Homo sapiens GN=FAU PE=1 SV=1	E9PR30_HUMAN (+1)	FAU	11 kDa	NA	632660	0	0	1465300	1	0	0	2
328	Protein disulfide-isomerase A6 OS=Homo sapiens GN=PDIA6 PE=1 SV=1	PDIA6_HUMAN	PDIA6	48 kDa	NA	925700	0	0	0	2	0	0	0
329	Peptidyl-prolyl cis-trans isomerase FKBP4 OS=Homo sapiens GN=FKBP4 PE=1 SV=3	FKBP4_HUMAN	FKBP4	52 kDa	NA	0	0	0	0	0	0	0	0
330	T-complex protein 1 subunit eta OS=Homo sapiens GN=CCT7 PE=1 SV=2	TCPH_HUMAN	CCT7	59 kDa	NA	0	0	0	0	0	0	0	0
331	Thioredoxin reductase 1, cytoplasmic OS=Homo sapiens GN=TXNRD1 PE=1 SV=1	A0A087WSW9_HUMAN (+6)	TXNRD1	60 kDa	NA	0	0	0	0	0	0	0	0
332	Arginine and glutamate-rich protein 1 OS=Homo sapiens GN=ARGLU1 PE=1 SV=1	ARGL1_HUMAN	ARGLU1	33 kDa	NA	0	0	0	0	0	0	0	0
333	Protein SON OS=Homo sapiens GN=SON PE=1 SV=4	SON_HUMAN	SON	264 kDa	NA	0	156740	0	0	0	2	0	0
334	Histone-binding protein RBBP7 OS=Homo sapiens GN=RBBP7 PE=1 SV=1	RBBP7_HUMAN	RBBP7	48 kDa	NA	0	0	0	0	0	0	0	0
335	rRNA 2'-O-methyltransferase fibrillarin OS=Homo sapiens GN=FBL PE=1 SV=2	FBRL_HUMAN (+7)	FBL	34 kDa	NA	428650	0	0	466520	2	0	0	1
336	Heterogeneous nuclear ribonucleoprotein A/B OS=Homo sapiens GN=HNRNPAB PE=1 SV=1	D6R9P3_HUMAN (+2)	HNRNPAB	30 kDa	NA	0	0	0	0	0	0	0	0
337	Monocarboxylate transporter 4 OS=Homo sapiens GN=SLC16A3 PE=1 SV=1	MOT4_HUMAN	SLC16A3	49 kDa	NA	0	0	0	0	0	0	0	0
338	Nuclear pore complex protein Nup98-Nup96 OS=Homo sapiens GN=NUP98 PE=1 SV=4	NUP98_HUMAN	NUP98	198 kDa	NA	0	309930	0	0	0	2	0	0
339	Far upstream element-binding protein 1 OS=Homo sapiens GN=FUBP1 PE=1 SV=1	E9PEB5_HUMAN (+1)	FUBP1	69 kDa	NA	0	0	0	0	0	0	0	0
340	Protein disulfide-isomerase A4 OS=Homo sapiens GN=PDIA4 PE=1 SV=2	PDIA4_HUMAN	PDIA4	73 kDa	NA	761020	0	0	0	2	0	0	0
341	Mitochondrial import receptor subunit TOM70 OS=Homo sapiens GN=TOMM70 PE=1 SV=1	TOM70_HUMAN	TOMM70	67 kDa	NA	0	0	0	0	0	0	0	0
342	Vesicle-trafficking protein SEC22b (Fragment) OS=Homo sapiens GN=SEC22B PE=1 SV=1	A0A087X1A9_HUMAN (+1)	SEC22B	9 kDa	NA	0	0	0	0	0	0	0	0
343	Ras-related protein Rab-6B (Fragment) OS=Homo sapiens GN=RAB6B PE=4 SV=1	C9JB90_HUMAN (+5)	RAB6B	6 kDa	NA	0	0	0	0	0	0	0	0
344	Pre-mRNA-splicing factor ATP-dependent RNA helicase DHX15 OS=Homo sapiens GN=DHX15 PE=1 SV=2	DHX15_HUMAN	DHX15	91 kDa	NA	0	0	0	0	0	0	0	0
345	Reticulon OS=Homo sapiens GN=RTN4 PE=1 SV=1	F8W914_HUMAN (+1)	RTN4	37 kDa	NA	159080	0	0	0	1	0	0	0
346	Translocon-associated protein subunit alpha OS=Homo sapiens GN=SSR1 PE=1 SV=1	C9IZQ1_HUMAN (+4)	SSR1	34 kDa	NA	312850	0	514410	0	1	0	1	0
347	40S ribosomal protein S29 OS=Homo sapiens GN=RPS29 PE=1 SV=2	RS29_HUMAN	RPS29	7 kDa	NA	323240	0	301280	0	1	0	1	0
348	Coiled-coil domain-containing protein 22 OS=Homo sapiens GN=CCDC22 PE=1 SV=1	CCD22_HUMAN	CCDC22	71 kDa	NA	0	1181800	0	0	0	1	0	0
349	General transcription factor 3C polypeptide 1 (Fragment) OS=Homo sapiens GN=GTF3C1 PE=1 SV=2	H3BU55_HUMAN	GTF3C1	16 kDa	NA	0	0	0	0	0	0	0	0
350	60S ribosomal protein L38 (Fragment) OS=Homo sapiens GN=RPL38 PE=1 SV=1	J3KSP2_HUMAN (+3)	RPL38	3 kDa	NA	0	0	444500	351150	0	0	1	1
351	Splicing factor 3A subunit 2 (Fragment) OS=Homo sapiens GN=SF3A2 PE=1 SV=2	K7EMT0_HUMAN (+1)	SF3A2	15 kDa	NA	0	79785	0	0	0	1	0	0
352	Ligand-dependent nuclear receptor corepressor-like protein OS=Homo sapiens GN=LCORL PE=1 SV=1	A0A1B0GVP4_HUMAN	LCORL	211 kDa	NA	530670	0	0	0	1	0	0	0
353	Signal recognition particle receptor subunit beta OS=Homo sapiens GN=SRPRB PE=1 SV=3	SRPRB_HUMAN	SRPRB	30 kDa	NA	0	0	0	0	0	0	0	0
354	Thioredoxin domain-containing protein 5 OS=Homo sapiens GN=TXNDC5 PE=1 SV=2	TXND5_HUMAN	TXNDC5	48 kDa	NA	0	0	0	0	0	0	0	0
355	Cluster of Eukaryotic peptide chain release factor GTP-binding subunit ERF3B OS=Homo sapiens GN=GSPT2 PE=1 SV=2 (ERF3B_HUMAN)	ERF3B_HUMAN [2]	GSPT2	69 kDa	TRUE	0	0	0	0	0	0	0	0
356	40S ribosomal protein S13 OS=Homo sapiens GN=RPS13 PE=1 SV=2	RS13_HUMAN	RPS13	17 kDa	NA	892230	0	0	0	3	0	0	0
357	Ubiquitin-like modifier-activating enzyme 1 OS=Homo sapiens GN=UBA1 PE=1 SV=3	UBA1_HUMAN	UBA1	118 kDa	NA	0	0	0	0	0	0	0	0
358	Cystatin-B OS=Homo sapiens GN=CSTB PE=1 SV=2	CYTB_HUMAN	CSTB	11 kDa	NA	0	0	0	0	0	0	0	0
359	Nucleosome assembly protein 1-like 1 OS=Homo sapiens GN=NAP1L1 PE=1 SV=1	B7Z9C2_HUMAN (+11)	NAP1L1	41 kDa	NA	0	0	0	0	0	0	0	0
360	Threonine--tRNA ligase, cytoplasmic (Fragment) OS=Homo sapiens GN=TARS PE=1 SV=1	D6R9F8_HUMAN (+3)	TARS	14 kDa	NA	0	0	0	0	0	0	0	0
361	Heat shock protein 105 kDa OS=Homo sapiens GN=HSPH1 PE=1 SV=1	A0A0A0MSM0_HUMAN (+1)	HSPH1	89 kDa	NA	0	0	0	0	0	0	0	0
362	Desmoglein-1 OS=Homo sapiens GN=DSG1 PE=1 SV=2	DSG1_HUMAN	DSG1	114 kDa	NA	399120	0	0	0	2	0	0	0
363	Synaptogyrin-2 OS=Homo sapiens GN=SYNGR2 PE=1 SV=1	SNG2_HUMAN	SYNGR2	25 kDa	NA	0	0	0	0	0	0	0	0
364	Macrophage migration inhibitory factor OS=Homo sapiens GN=MIF PE=1 SV=4	MIF_HUMAN	MIF	12 kDa	NA	0	0	0	0	0	0	0	0
365	C-1-tetrahydrofolate synthase, cytoplasmic OS=Homo sapiens GN=MTHFD1 PE=1 SV=3	C1TC_HUMAN (+1)	MTHFD1	102 kDa	NA	0	0	0	0	0	0	0	0
366	tr|F5H269|F5H269_HUMAN	F5H269_HUMAN-DECOY	F5H269_HUMAN-DECOY	?	NA	0	0	0	0	0	0	0	0
367	CON__P02666	CON__P02666	CON__P02666	?	NA	0	0	0	2558700	0	0	0	1
368	BAG family molecular chaperone regulator 2 OS=Homo sapiens GN=BAG2 PE=1 SV=1	BAG2_HUMAN	BAG2	24 kDa	NA	0	0	0	0	0	0	0	0
369	Nesprin-2 OS=Homo sapiens GN=SYNE2 PE=1 SV=1	A0A0A0MRE3_HUMAN (+2)	SYNE2	788 kDa	NA	1915200	0	0	0	2	0	0	0
370	Dolichyl-diphosphooligosaccharide--protein glycosyltransferase subunit 1 OS=Homo sapiens GN=RPN1 PE=1 SV=1	B7Z4L4_HUMAN (+1)	RPN1	50 kDa	NA	0	0	0	0	0	0	0	0
371	Nuclear pore complex protein Nup93 OS=Homo sapiens GN=NUP93 PE=1 SV=1	H3BVG0_HUMAN (+1)	NUP93	100 kDa	NA	0	0	86228	0	0	0	1	0
372	FACT complex subunit SSRP1 OS=Homo sapiens GN=SSRP1 PE=1 SV=1	SSRP1_HUMAN	SSRP1	81 kDa	NA	296960	0	0	0	1	0	0	0
373	Galectin-1 OS=Homo sapiens GN=LGALS1 PE=1 SV=2	LEG1_HUMAN	LGALS1	15 kDa	NA	0	0	0	0	0	0	0	0
374	Cleavage and polyadenylation specificity factor subunit 1 OS=Homo sapiens GN=CPSF1 PE=1 SV=2	CPSF1_HUMAN	CPSF1	161 kDa	NA	0	0	0	0	0	0	0	1
375	Peptidyl-tRNA hydrolase 2, mitochondrial OS=Homo sapiens GN=PTRH2 PE=1 SV=1	J3KQ48_HUMAN (+1)	PTRH2	19 kDa	NA	0	0	0	0	0	0	0	0
376	Zinc transporter ZIP10 OS=Homo sapiens GN=SLC39A10 PE=1 SV=2	S39AA_HUMAN	SLC39A10	94 kDa	NA	0	0	0	0	0	0	0	0
377	Importin subunit alpha-1 OS=Homo sapiens GN=KPNA2 PE=1 SV=1	IMA1_HUMAN	KPNA2	58 kDa	NA	0	0	0	0	1	0	0	0
378	26S protease regulatory subunit 8 (Fragment) OS=Homo sapiens GN=PSMC5 PE=1 SV=1	J3QQM1_HUMAN (+1)	PSMC5	29 kDa	NA	127790	0	0	0	1	0	0	0
379	Acyl-CoA desaturase OS=Homo sapiens GN=SCD PE=1 SV=2	ACOD_HUMAN	SCD	42 kDa	NA	0	405700	0	0	0	1	0	1
380	Solute carrier family 25 (Mitochondrial carrier citrate transporter), member 1, isoform CRA_b OS=Homo sapiens GN=SLC25A1 PE=1 SV=1	B4DP62_HUMAN (+1)	SLC25A1	23 kDa	NA	0	0	0	0	0	0	0	0
381	tr|A0A087X1C4|A0A087X1C4_HUMAN	A0A087X1C4_HUMAN-DECOY	A0A087X1C4_HUMAN-DECOY	?	NA	581390	0	0	0	1	0	0	0
382	Dynein heavy chain 9, axonemal OS=Homo sapiens GN=DNAH9 PE=1 SV=3	DYH9_HUMAN (+1)	DNAH9	512 kDa	NA	0	0	0	0	0	0	0	0
383	Serine/threonine-protein phosphatase 2A regulatory subunit B'' subunit alpha OS=Homo sapiens GN=PPP2R3A PE=1 SV=1	P2R3A_HUMAN	PPP2R3A	130 kDa	NA	0	0	0	0	0	0	0	0
384	E3 SUMO-protein ligase RanBP2 OS=Homo sapiens GN=RANBP2 PE=1 SV=2	RBP2_HUMAN	RANBP2	358 kDa	TRUE	0	0	0	0	0	0	0	0
385	sp|Q6ZS86|GLPK5_HUMAN	GLPK5_HUMAN-DECOY	GLPK5_HUMAN-DECOY	?	NA	0	0	0	5424100	0	0	0	1
386	Ribosome-binding protein 1 OS=Homo sapiens GN=RRBP1 PE=1 SV=1	A0A087WU26_HUMAN (+4)	RRBP1	39 kDa	NA	0	0	207140	0	0	0	1	0
387	Thymosin beta-10 OS=Homo sapiens GN=TMSB10 PE=1 SV=2	TYB10_HUMAN	TMSB10	5 kDa	NA	2150000	0	0	0	1	0	0	0
388	Alanine--tRNA ligase, cytoplasmic OS=Homo sapiens GN=AARS PE=1 SV=2	SYAC_HUMAN	AARS	107 kDa	NA	0	0	0	0	0	0	0	0
389	sp|Q9NYQ6|CELR1_HUMAN	CELR1_HUMAN-DECOY	CELR1_HUMAN-DECOY	?	NA	0	0	0	0	0	0	0	0
390	sp|Q5VST9|OBSCN_HUMAN	OBSCN_HUMAN-DECOY	OBSCN_HUMAN-DECOY	?	NA	0	0	0	0	0	0	0	0
391	Peptidyl-prolyl cis-trans isomerase FKBP8 OS=Homo sapiens GN=FKBP8 PE=1 SV=1	A0A0A0MTJ1_HUMAN (+2)	FKBP8	27 kDa	NA	0	0	0	0	0	0	0	0
392	Cysteine and histidine-rich domain-containing protein 1 OS=Homo sapiens GN=CHORDC1 PE=1 SV=2	CHRD1_HUMAN (+3)	CHORDC1	37 kDa	NA	0	0	0	0	0	0	0	0
393	Prothymosin alpha OS=Homo sapiens GN=PTMA PE=1 SV=1	B8ZZQ6_HUMAN (+1)	PTMA	12 kDa	NA	1370000	0	0	0	2	0	0	0
394	Caprin-1 OS=Homo sapiens GN=CAPRIN1 PE=1 SV=2	CAPR1_HUMAN (+1)	CAPRIN1	78 kDa	NA	0	0	0	0	0	0	0	0
395	Phosphoglycerate kinase 1 OS=Homo sapiens GN=PGK1 PE=1 SV=3	PGK1_HUMAN	PGK1	45 kDa	NA	1128800	0	0	0	2	0	0	0
396	Thyroid hormone receptor-associated protein 3 OS=Homo sapiens GN=THRAP3 PE=1 SV=2	TR150_HUMAN	THRAP3	109 kDa	NA	0	0	0	614090	0	0	0	2
397	Skin-specific protein 32 OS=Homo sapiens GN=XP32 PE=1 SV=1	XP32_HUMAN	XP32	26 kDa	NA	467660	0	0	0	2	0	0	0
398	Ezrin OS=Homo sapiens GN=EZR PE=1 SV=3	E7EQR4_HUMAN (+1)	EZR	69 kDa	NA	0	0	0	0	0	0	0	0
399	Thymidine kinase OS=Homo sapiens GN=TK1 PE=1 SV=1	K7ERV3_HUMAN (+1)	TK1	29 kDa	NA	0	0	0	0	0	0	0	0
400	Calreticulin OS=Homo sapiens GN=CALR PE=1 SV=1	CALR_HUMAN (+1)	CALR	48 kDa	NA	445520	0	0	0	2	0	0	0
401	RNA-binding protein 28 OS=Homo sapiens GN=RBM28 PE=1 SV=3	RBM28_HUMAN	RBM28	86 kDa	NA	0	0	0	0	0	0	0	0
402	NADH-cytochrome b5 reductase 3 OS=Homo sapiens GN=CYB5R3 PE=1 SV=3	NB5R3_HUMAN	CYB5R3	34 kDa	NA	0	0	0	0	0	0	0	0
403	Far upstream element-binding protein 2 OS=Homo sapiens GN=KHSRP PE=1 SV=1	A0A087WTP3_HUMAN (+3)	KHSRP	73 kDa	NA	0	0	0	0	0	0	0	0
404	Protein CutA OS=Homo sapiens GN=CUTA PE=1 SV=2	CUTA_HUMAN	CUTA	19 kDa	NA	0	0	0	0	0	0	0	0
405	Signal recognition particle receptor subunit alpha OS=Homo sapiens GN=SRPRA PE=1 SV=2	SRPRA_HUMAN	SRPRA	70 kDa	NA	0	0	0	0	0	0	0	0
406	Tetratricopeptide repeat protein 38 (Fragment) OS=Homo sapiens GN=TTC38 PE=1 SV=1	H7C089_HUMAN (+1)	TTC38	13 kDa	NA	0	0	780650	0	0	0	2	0
407	Adenosylhomocysteinase OS=Homo sapiens GN=AHCY PE=1 SV=4	SAHH_HUMAN	AHCY	48 kDa	NA	0	0	0	0	0	0	0	0
408	Kinesin-1 heavy chain OS=Homo sapiens GN=KIF5B PE=1 SV=1	KINH_HUMAN	KIF5B	110 kDa	NA	0	0	0	0	0	0	0	0
409	Cytoplasmic FMR1-interacting protein 1 (Fragment) OS=Homo sapiens GN=CYFIP1 PE=1 SV=4	A0A0G2JQT1_HUMAN (+6)	CYFIP1	100 kDa	NA	0	0	0	0	0	0	0	0
410	Eukaryotic initiation factor 4A-III OS=Homo sapiens GN=EIF4A3 PE=1 SV=4	IF4A3_HUMAN	EIF4A3	47 kDa	TRUE	0	0	0	0	0	0	0	0
411	Nuclear pore glycoprotein p62 OS=Homo sapiens GN=NUP62 PE=1 SV=1	M0QXN5_HUMAN (+1)	NUP62	46 kDa	NA	0	0	0	0	0	0	0	0
412	Heme oxygenase 2 (Fragment) OS=Homo sapiens GN=HMOX2 PE=1 SV=1	A0A1B0GXH0_HUMAN (+6)	HMOX2	15 kDa	NA	0	0	0	0	0	0	0	0
413	Sequestosome-1 OS=Homo sapiens GN=SQSTM1 PE=1 SV=1	SQSTM_HUMAN	SQSTM1	48 kDa	NA	0	0	0	0	0	0	0	0
414	Translocon-associated protein subunit gamma OS=Homo sapiens GN=SSR3 PE=1 SV=1	C9JA28_HUMAN (+1)	SSR3	20 kDa	NA	476590	0	0	0	1	0	0	0
415	tr|C9JQZ7|C9JQZ7_HUMAN	C9JQZ7_HUMAN-DECOY	C9JQZ7_HUMAN-DECOY	?	NA	877300	0	0	0	1	0	0	0
416	Serine/arginine-rich-splicing factor 1 (Fragment) OS=Homo sapiens GN=SRSF1 PE=1 SV=1	J3KSR8_HUMAN (+2)	SRSF1	16 kDa	NA	296520	0	0	0	1	0	0	0
417	DNA replication licensing factor MCM3 OS=Homo sapiens GN=MCM3 PE=1 SV=3	MCM3_HUMAN	MCM3	91 kDa	NA	333170	0	490980	0	1	0	1	0
418	Myb-binding protein 1A (Fragment) OS=Homo sapiens GN=MYBBP1A PE=1 SV=1	I3L1L3_HUMAN (+2)	MYBBP1A	140 kDa	NA	0	0	0	0	0	0	0	0
419	Mitochondrial carrier homolog 2 OS=Homo sapiens GN=MTCH2 PE=1 SV=1	MTCH2_HUMAN	MTCH2	33 kDa	NA	0	0	0	0	0	0	0	0
420	Eukaryotic translation initiation factor 3 subunit C OS=Homo sapiens GN=EIF3C PE=1 SV=1	EIF3C_HUMAN (+1)	EIF3C	105 kDa	NA	249050	0	0	0	1	0	0	0
421	Titin OS=Homo sapiens GN=TTN PE=1 SV=1	A0A0A0MTS7_HUMAN (+1)	TTN	3994 kDa	NA	0	0	0	946520	0	0	0	1
422	tr|J3QL39|J3QL39_HUMAN	J3QL39_HUMAN-DECOY	J3QL39_HUMAN-DECOY	?	NA	0	0	0	0	0	0	0	0
423	Mitochondrial import receptor subunit TOM22 homolog OS=Homo sapiens GN=TOMM22 PE=1 SV=3	TOM22_HUMAN	TOMM22	16 kDa	NA	400300	0	0	0	1	0	0	0
424	Very-long-chain enoyl-CoA reductase OS=Homo sapiens GN=TECR PE=1 SV=1	TECR_HUMAN	TECR	36 kDa	NA	0	0	0	0	0	0	0	0
425	Plectin OS=Homo sapiens GN=PLEC PE=1 SV=3	PLEC_HUMAN	PLEC	532 kDa	NA	397780	0	0	0	1	0	0	0
426	Eukaryotic translation initiation factor 3 subunit F OS=Homo sapiens GN=EIF3F PE=1 SV=1	EIF3F_HUMAN (+1)	EIF3F	38 kDa	NA	0	0	0	0	0	0	0	0
427	Proteasome activator complex subunit 2 OS=Homo sapiens GN=PSME2 PE=1 SV=1	A0A087X1Z3_HUMAN (+2)	PSME2	29 kDa	NA	0	0	0	0	0	0	0	0
428	Dynamin-1-like protein OS=Homo sapiens GN=DNM1L PE=1 SV=2	DNM1L_HUMAN (+2)	DNM1L	82 kDa	NA	0	0	0	0	0	0	0	0
429	Extended synaptotagmin-1 OS=Homo sapiens GN=ESYT1 PE=1 SV=1	ESYT1_HUMAN (+1)	ESYT1	123 kDa	NA	0	0	0	0	0	0	0	0
430	Inorganic pyrophosphatase OS=Homo sapiens GN=PPA1 PE=1 SV=2	IPYR_HUMAN	PPA1	33 kDa	NA	0	0	0	0	0	0	0	0
431	Elongation factor 1-delta OS=Homo sapiens GN=EEF1D PE=1 SV=1	A0A087X1X7_HUMAN (+12)	EEF1D	69 kDa	NA	251070	0	0	0	1	0	0	0
432	Nascent polypeptide-associated complex subunit alpha (Fragment) OS=Homo sapiens GN=NACA PE=1 SV=1	F8VNW4_HUMAN (+6)	NACA	16 kDa	NA	639600	0	0	0	1	0	0	0
433	Putative high mobility group protein B1-like 1 OS=Homo sapiens GN=HMGB1P1 PE=5 SV=1	HGB1A_HUMAN (+2)	HMGB1P1	24 kDa	NA	263410	0	0	0	1	0	0	0
434	High mobility group protein HMG-I/HMG-Y OS=Homo sapiens GN=HMGA1 PE=1 SV=3	HMGA1_HUMAN	HMGA1	12 kDa	NA	390640	0	0	0	1	0	0	0
435	26S proteasome non-ATPase regulatory subunit 11 (Fragment) OS=Homo sapiens GN=PSMD11 PE=1 SV=8	J3QRY4_HUMAN (+1)	PSMD11	21 kDa	NA	199450	0	0	0	1	0	0	0
436	Nucleoplasmin-3 OS=Homo sapiens GN=NPM3 PE=1 SV=3	NPM3_HUMAN	NPM3	19 kDa	NA	571370	0	0	0	1	0	0	0
437	Myosin regulatory light chain 12A (Fragment) OS=Homo sapiens GN=MYL12A PE=1 SV=1	J3KTJ1_HUMAN (+4)	MYL12A	13 kDa	NA	0	0	0	0	0	0	0	0
438	Zinc finger protein 248 OS=Homo sapiens GN=ZNF248 PE=2 SV=1	ZN248_HUMAN	ZNF248	67 kDa	NA	0	0	0	0	0	0	0	0
439	Structural maintenance of chromosomes protein OS=Homo sapiens GN=SMC1A PE=1 SV=2	G8JLG1_HUMAN (+2)	SMC1A	141 kDa	NA	0	0	0	0	0	0	0	0
440	Transient receptor potential cation channel subfamily V member 6 OS=Homo sapiens GN=TRPV6 PE=3 SV=1	A0A0G2JMR5_HUMAN (+1)	TRPV6	83 kDa	NA	0	0	0	0	0	0	0	0
441	Vesicle-associated membrane protein-associated protein A OS=Homo sapiens GN=VAPA PE=1 SV=3	VAPA_HUMAN	VAPA	28 kDa	NA	0	0	0	0	0	0	0	0
442	EEF1E1-BLOC1S5 readthrough (NMD candidate) OS=Homo sapiens GN=EEF1E1-BLOC1S5 PE=4 SV=2	C9J1V9_HUMAN (+2)	EEF1E1-BLOC1S5	17 kDa	NA	0	0	0	390710	0	0	0	1
443	CON__P02754	CON__P02754	CON__P02754	?	NA	0	0	0	996870	0	0	0	1
444	Histone deacetylase complex subunit SAP18 (Fragment) OS=Homo sapiens GN=SAP18 PE=1 SV=2	H7BZW6_HUMAN (+2)	SAP18	16 kDa	NA	0	0	0	234660	0	0	0	1
445	sp|Q96PZ0|PUS7_HUMAN	PUS7_HUMAN-DECOY	PUS7_HUMAN-DECOY	?	NA	0	0	0	934380	0	0	0	1
446	RNA binding protein fox-1 homolog OS=Homo sapiens GN=RBFOX1 PE=4 SV=1	A0A087X2B1_HUMAN (+16)	RBFOX1	40 kDa	NA	0	105650	0	0	0	1	0	0
447	HLA class I histocompatibility antigen, A-1 alpha chain OS=Homo sapiens GN=HLA-A PE=1 SV=1	1A01_HUMAN (+63)	HLA-A	41 kDa	NA	0	0	0	0	0	0	0	0
448	Phosphoglycerate mutase 1 OS=Homo sapiens GN=PGAM1 PE=1 SV=2	PGAM1_HUMAN (+2)	PGAM1	29 kDa	NA	440500	0	0	0	1	0	0	0
449	SUN domain-containing protein 1 OS=Homo sapiens GN=SUN1 PE=1 SV=1	E9PHI4_HUMAN (+3)	SUN1	91 kDa	NA	0	0	131390	0	0	0	1	0
450	sp|Q5T5P2|SKT_HUMAN	SKT_HUMAN-DECOY	SKT_HUMAN-DECOY	?	NA	0	0	0	0	0	0	0	0
451	Destrin OS=Homo sapiens GN=DSTN PE=1 SV=3	DEST_HUMAN	DSTN	19 kDa	NA	0	0	0	0	0	0	0	0
452	Phenylalanine--tRNA ligase alpha subunit (Fragment) OS=Homo sapiens GN=FARSA PE=1 SV=8	K7EK06_HUMAN (+2)	FARSA	18 kDa	NA	148690	0	0	0	1	0	0	0
453	Katanin p60 ATPase-containing subunit A-like 2 (Fragment) OS=Homo sapiens GN=KATNAL2 PE=1 SV=1	K7EIJ8_HUMAN (+2)	KATNAL2	38 kDa	NA	0	0	0	0	0	0	0	0
454	E3 ubiquitin-protein ligase MYCBP2 (Fragment) OS=Homo sapiens GN=MYCBP2 PE=1 SV=1	H7C3U4_HUMAN (+1)	MYCBP2	118 kDa	NA	0	0	0	0	0	0	0	0
455	Activated RNA polymerase II transcriptional coactivator p15 OS=Homo sapiens GN=SUB1 PE=1 SV=3	TCP4_HUMAN	SUB1	14 kDa	NA	0	0	0	975130	0	0	0	1
456	rRNA/tRNA 2'-O-methyltransferase fibrillarin-like protein 1 OS=Homo sapiens GN=FBLL1 PE=3 SV=2	FBLL1_HUMAN	FBLL1	35 kDa	NA	0	0	0	0	1	0	0	0
457	Brefeldin A-inhibited guanine nucleotide-exchange protein 3 OS=Homo sapiens GN=ARFGEF3 PE=1 SV=3	BIG3_HUMAN	ARFGEF3	241 kDa	NA	0	0	0	0	0	0	0	0
458	Tektin-3 (Fragment) OS=Homo sapiens GN=TEKT3 PE=1 SV=1	F5H5M8_HUMAN (+1)	TEKT3	22 kDa	NA	0	0	0	3831700	0	0	0	1
459	Mitochondrial import receptor subunit TOM40 homolog (Fragment) OS=Homo sapiens GN=TOMM40 PE=1 SV=1	K7EKG4_HUMAN (+1)	TOMM40	18 kDa	NA	0	0	0	0	0	0	0	0
460	Keratin, type II cytoskeletal 80 OS=Homo sapiens GN=KRT80 PE=1 SV=2	K2C80_HUMAN (+1)	KRT80	51 kDa	NA	129480	0	0	0	1	0	0	0
