# Supplementary material for: A specific role for importin-5 and NASP in the import and nuclear hand-off of monomeric H3
Source: eLife. 2022 Sep 6;11:e81755. doi: 10.7554/eLife.81755 (PMC9560165; doi:10.7554/eLife.81755)
Supplement: Figure 5—source data 5. — Total precursor intensity and p-value used in Figure 5G and H. [file elife-81755-fig5-data5.xlsx]

## Sheet: MS_H3_APEX_RR_DEP
Figure 5—Source Data 2. MS data for H3.1-APEX2 at 0 and 120 minutes after rapamycin					Linear Model		P.val		P.adj
	Fasta.headers	Accession.Number	Alternate.ID	Mol..weight..kDa.	min10_vs_min0_ratio	min120_vs_min0_ratio	min10_vs_min0_p.val	min120_vs_min0_p.val	min10_vs_min0_p.adj	min120_vs_min0_p.adj	min10_vs_min0_significant	min120_vs_min0_significant	significant	Cell_Atlas	Intensity.MS19.208_000min_1	Intensity.MS19.208_000min_2	Intensity.MS19.208_000min_3	Intensity.MS19.208_010min_1	Intensity.MS19.208_010min_2	Intensity.MS19.208_010min_3	Intensity.MS19.208_120min_1	Intensity.MS19.208_120min_2	Intensity.MS19.208_120min_3	Unique.peptides.MS19.208_000min_1	Unique.peptides.MS19.208_000min_2	Unique.peptides.MS19.208_000min_3	Unique.peptides.MS19.208_010min_1	Unique.peptides.MS19.208_010min_2	Unique.peptides.MS19.208_010min_3	Unique.peptides.MS19.208_120min_1	Unique.peptides.MS19.208_120min_2	Unique.peptides.MS19.208_120min_3
1	1161_H3_bait	1161_H3_bait	1161_H3_bait	93.549	-1.69	-2.57	0.00877501	0.000758032	1	0.000216	FALSE	TRUE	TRUE	other	944080000	953910000	1044300000	156300000	131150000	268740000	30451000	120110000	91281000	23	24	23	18	17	18	8	13	13
83	Alanine--tRNA ligase, cytoplasmic OS=Homo sapiens OX=9606 GN=AARS PE=1 SV=2;Alanine--tRNA ligase, cytoplasmic (Fragment) OS=Homo sapiens OX=9606 GN=AARS PE=1 SV=3	P49588	AARS	106.81	0.93	0.0873	0.299219	0.919648	1	0.678	FALSE	FALSE	FALSE	other	1816700	1833700	2320900	0	612370	1842500	0	0	0	1	2	1	0	1	1	0	0	0
84	Putative ATP-binding cassette sub-family A member 11 OS=Homo sapiens OX=9606 GN=ABCA11P PE=2 SV=1	Q4W5N1	ABCA11P	17.479	0.326	0.989	0.777156	0.399614	1	0.52	FALSE	FALSE	FALSE	other	0	0	0	0	0	0	4766700	6397600	4931600	0	0	0	0	0	0	1	1	1
85	ATP-binding cassette sub-family E member 1 OS=Homo sapiens OX=9606 GN=ABCE1 PE=1 SV=1;ATP-binding cassette sub-family E member 1 OS=Homo sapiens OX=9606 GN=ABCE1 PE=1 SV=1	D6R9I9	ABCE1	47.037	-0.0738	-0.362	0.920857	0.628171	1	0.606	FALSE	FALSE	FALSE	cyto	422600	519180	517750	0	0	0	0	0	0	1	1	1	0	0	0	0	0	0
86	ATP-binding cassette sub-family F member 1 (Fragment) OS=Homo sapiens OX=9606 GN=ABCF1 PE=1 SV=1;ATP-binding cassette sub-family F member 1 (Fragment) OS=Homo sapiens OX=9606 GN=ABCF1 PE=1 SV=9;ATP-binding cassette sub-family F member 1 OS=Homo sapiens OX=	F5GYK6	ABCF1	11.689	0.31	-0.323	0.535175	0.517539	1	0.567	FALSE	FALSE	FALSE	cyto	0	1354700	818620	0	0	0	0	0	0	0	1	1	0	0	0	0	0	0
2	ATP-binding cassette sub-family F member 2 OS=Homo sapiens OX=9606 GN=ABCF2 PE=1 SV=2;ATP-binding cassette sub-family F member 2 (Fragment) OS=Homo sapiens OX=9606 GN=ABCF2 PE=1 SV=1;ATP-binding cassette sub-family F member 2 (Fragment) OS=Homo sapiens OX=	Q9UG63	ABCF2	71.289	-0.646	-3.13	0.303869	0.000638719	1	0.000137	FALSE	TRUE	TRUE	cyto	4162000	5701100	4432000	833240	3730300	6914200	4544300	2056500	6209300	2	2	2	1	2	4	1	1	1
87	Acetyl-CoA carboxylase 1 OS=Homo sapiens OX=9606 GN=ACACA PE=1 SV=2	Q13085	ACACA	265.55	0.403	-0.372	0.363524	0.399286	1	0.52	FALSE	FALSE	FALSE	cyto	10658000000	15535000000	16770000000	7444400000	15652000000	18627000000	5799400000	11740000000	10395000000	77	84	81	78	86	81	69	83	80
88	Acetyl-CoA carboxylase 2 OS=Homo sapiens OX=9606 GN=ACACB PE=1 SV=3	O00763	ACACB	276.54	0.279	-0.565	0.564682	0.258647	1	0.474	FALSE	FALSE	FALSE	other	108750000	96355000	181200000	96896000	114520000	219150000	51113000	39896000	68107000	20	19	25	25	26	31	15	11	15
89	ATP-citrate synthase OS=Homo sapiens OX=9606 GN=ACLY PE=1 SV=3	P53396	ACLY	120.84	-4.25	-0.0827	2.57849e-05	0.874801	1	0.669	FALSE	FALSE	FALSE	cyto	13052000	19290000	9162500	0	2786500	1345000	6407400	20159000	14770000	5	7	3	0	1	2	4	6	7
90	Acyl-coenzyme A thioesterase 9, mitochondrial OS=Homo sapiens OX=9606 GN=ACOT9 PE=1 SV=2;Acyl-coenzyme A thioesterase 9, mitochondrial (Fragment) OS=Homo sapiens OX=9606 GN=ACOT9 PE=1 SV=1	Q9Y305	ACOT9	49.901	1.6	0.12	0.238546	0.926652	1	0.68	FALSE	FALSE	FALSE	cyto	3902300	1797800	3806300	3587100	1730500	5561000	2685000	1832900	2345900	2	1	1	2	1	2	2	2	1
3	Long-chain-fatty-acid--CoA ligase 3 OS=Homo sapiens OX=9606 GN=ACSL3 PE=1 SV=3	O95573	ACSL3	80.419	-2.81	-3.5	0.000545508	0.000121118	1	5.24e-07	FALSE	TRUE	TRUE	nuc	5449800	5613200	6694600	0	0	1558300	0	1752500	1091300	4	3	3	0	0	1	0	1	1
91	Acetyl-coenzyme A synthetase, cytoplasmic (Fragment) OS=Homo sapiens OX=9606 GN=ACSS2 PE=1 SV=1;Acetyl-coenzyme A synthetase, cytoplasmic (Fragment) OS=Homo sapiens OX=9606 GN=ACSS2 PE=1 SV=1;Acetyl-coenzyme A synthetase, cytoplasmic OS=Homo sapiens OX=960	C9J7L5	ACSS2	18.655	2.87	2.2	0.277647	0.398232	1	0.519	FALSE	FALSE	FALSE	other	15256000	15759000	32741000	11624000	41330000	91629000	55046000	12695000	25910000	1	1	1	1	1	1	1	1	1
92	Actin, alpha skeletal muscle OS=Homo sapiens OX=9606 GN=ACTA1 PE=1 SV=1;Actin, alpha cardiac muscle 1 OS=Homo sapiens OX=9606 GN=ACTC1 PE=1 SV=1;Actin, aortic smooth muscle OS=Homo sapiens OX=9606 GN=ACTA2 PE=1 SV=1;Actin, alpha skeletal muscle OS=Homo sap	P68133	ACTA1	42.051	3.51	3.26	0.27348	0.306738	1	0.489	FALSE	FALSE	FALSE	other	0	0	83776000	24760000	214370000	0	0	552450000	121250000	0	0	1	1	2	0	0	4	1
93	Actin, cytoplasmic 1 OS=Homo sapiens OX=9606 GN=ACTB PE=1 SV=1;Actin, cytoplasmic 1 (Fragment) OS=Homo sapiens OX=9606 GN=ACTB PE=1 SV=1;Actin, cytoplasmic 1 OS=Homo sapiens OX=9606 GN=ACTB PE=1 SV=1;Actin, cytoplasmic 1 (Fragment) OS=Homo sapiens OX=9606	P60709	ACTB	41.736	0.528	0.313	0.500017	0.686795	1	0.623	FALSE	FALSE	FALSE	other	20064000	35548000	0	0	74385000	0	0	233600000	919580	1	1	0	0	1	0	0	1	1
94	Actin, cytoplasmic 2 OS=Homo sapiens OX=9606 GN=ACTG1 PE=1 SV=1;Actin, cytoplasmic 2 (Fragment) OS=Homo sapiens OX=9606 GN=ACTG1 PE=1 SV=1;Actin, cytoplasmic 2 (Fragment) OS=Homo sapiens OX=9606 GN=ACTG1 PE=1 SV=1;Actin, cytoplasmic 2 (Fragment) OS=Homo sa	P63261	ACTG1	41.792	0.406	0.636	0.711992	0.565398	1	0.585	FALSE	FALSE	FALSE	other	851830000	1773400000	1305600000	393690000	4098100000	1128900000	332460000	12423000000	1294900000	1	1	1	1	1	1	1	1	1
95	Actin-like protein 6A OS=Homo sapiens OX=9606 GN=ACTL6A PE=1 SV=1	O96019	ACTL6A	47.46	0.601	0.883	0.491823	0.320631	1	0.494	FALSE	FALSE	FALSE	nuc	0	0	0	0	0	0	1484800	0	0	0	0	0	0	0	0	1	0	0
4	Alpha-actinin-4 OS=Homo sapiens OX=9606 GN=ACTN4 PE=1 SV=2;Alpha-actinin-4 OS=Homo sapiens OX=9606 GN=ACTN4 PE=1 SV=2;Alpha-actinin-4 (Fragment) OS=Homo sapiens OX=9606 GN=ACTN4 PE=1 SV=1	O43707	ACTN4	104.85	-1.43	-4.16	0.0440251	0.00010252	1	2.68e-07	FALSE	TRUE	TRUE	nuc	11781000	21707000	8640600	895020	2970800	2601400	0	0	0	5	7	5	2	3	2	0	0	0
5	Double-stranded RNA-specific adenosine deaminase OS=Homo sapiens OX=9606 GN=ADAR PE=1 SV=4;Double-stranded RNA-specific adenosine deaminase (Fragment) OS=Homo sapiens OX=9606 GN=ADAR PE=1 SV=1;Double-stranded RNA-specific adenosine deaminase (Fragment) OS=	P55265	ADAR	136.06	0.881	5.72	0.342635	0.000154236	1	1.29e-06	FALSE	TRUE	TRUE	nuc	0	0	0	0	0	0	28114000	10607000	33978000	0	0	0	0	0	0	9	4	10
96	2-aminoethanethiol dioxygenase OS=Homo sapiens OX=9606 GN=ADO PE=1 SV=2	Q96SZ5	ADO	29.751	0.229	1.19	0.876247	0.42727	1	0.529	FALSE	FALSE	FALSE	other	4600000	34727000	8229300	2972100	27588000	34210000	7171100	38304000	18094000	2	6	3	2	5	6	5	6	5
97	Proteasomal ubiquitin receptor ADRM1 OS=Homo sapiens OX=9606 GN=ADRM1 PE=1 SV=1;Proteasomal ubiquitin receptor ADRM1 OS=Homo sapiens OX=9606 GN=ADRM1 PE=1 SV=2	A0A087WX59	ADRM1	37.504	0.891	0.697	0.325964	0.436799	1	0.532	FALSE	FALSE	FALSE	other	0	2239000	1939300	714510	1300400	1279000	1068000	2626400	1463800	0	1	1	1	1	1	1	1	1
98	Actin filament-associated protein 1 OS=Homo sapiens OX=9606 GN=AFAP1 PE=1 SV=2	Q8N556	AFAP1	80.724	0.696	0.855	0.433355	0.33994	1	0.5	FALSE	FALSE	FALSE	cyto	1538600	0	2238400	0	0	0	1492900	1256000	0	1	0	1	0	0	0	1	1	0
99	Adenosylhomocysteinase OS=Homo sapiens OX=9606 GN=AHCY PE=1 SV=4	P23526	AHCY	47.716	1.72	0.339	0.0308279	0.622978	1	0.604	FALSE	FALSE	FALSE	cyto	3361500	2976600	1326900	0	2627100	0	1539700	2351800	0	1	3	2	0	2	0	2	1	0
100	Neuroblast differentiation-associated protein AHNAK OS=Homo sapiens OX=9606 GN=AHNAK PE=1 SV=2	Q09666	AHNAK	629.09	1.11	1.65	0.2986	0.138798	1	0.402	FALSE	FALSE	FALSE	cyto	0	0	5490700	1659900	5957000	2314200	0	2925500	4904400	0	1	2	1	2	2	0	1	2
101	Activator of 90 kDa heat shock protein ATPase homolog 1 OS=Homo sapiens OX=9606 GN=AHSA1 PE=1 SV=1;Activator of 90 kDa heat shock protein ATPase homolog 1 (Fragment) OS=Homo sapiens OX=9606 GN=AHSA1 PE=1 SV=1;Activator of 90 kDa heat shock protein ATPase h	O95433	AHSA1	38.274	-0.432	-0.568	0.811081	0.753808	1	0.641	FALSE	FALSE	FALSE	cyto	8252200	11700000	9123700	4003600	8024600	8017700	2053300	17601000	3564400	2	2	3	2	2	2	1	3	2
102	Aminoacyl tRNA synthase complex-interacting multifunctional protein 2 OS=Homo sapiens OX=9606 GN=AIMP2 PE=1 SV=2;Aminoacyl tRNA synthase complex-interacting multifunctional protein 2 OS=Homo sapiens OX=9606 GN=AIMP2 PE=1 SV=2	Q13155	AIMP2	35.348	1.59	1.22	0.172719	0.283928	1	0.483	FALSE	FALSE	FALSE	cyto	852170	1453300	1433400	794840	743860	4004900	2248500	1422200	867620	1	1	2	1	1	2	2	1	1
103	AH receptor-interacting protein OS=Homo sapiens OX=9606 GN=AIP PE=1 SV=2;Peptidylprolyl isomerase (Fragment) OS=Homo sapiens OX=9606 GN=AIP PE=1 SV=2	O00170	AIP	37.636	-0.478	-0.257	0.688587	0.829077	1	0.659	FALSE	FALSE	FALSE	cyto	0	5760100	1084000	0	0	0	1168800	4588400	4808900	0	3	1	0	0	0	2	2	2
6	A-kinase anchor protein 1, mitochondrial OS=Homo sapiens OX=9606 GN=AKAP1 PE=1 SV=1;A-kinase anchor protein 1, mitochondrial (Fragment) OS=Homo sapiens OX=9606 GN=AKAP1 PE=1 SV=1	Q92667	AKAP1	97.34	-3.47	-5.6	0.00412864	0.000195707	1	3.12e-06	FALSE	TRUE	TRUE	mito	16532000	28503000	21657000	910710	0	2050000	0	0	0	6	8	6	1	0	2	0	0	0
7	A-kinase anchor protein 8 OS=Homo sapiens OX=9606 GN=AKAP8 PE=1 SV=1	O43823	AKAP8	76.107	0.349	3.96	0.635223	0.000450802	1	4.94e-05	FALSE	TRUE	TRUE	nuc	286620	418070	625870	0	370360	415590	10289000	8730100	9740100	1	1	1	0	1	1	3	3	3
104	A-kinase anchor protein 8-like OS=Homo sapiens OX=9606 GN=AKAP8L PE=1 SV=4	Q9ULX6	AKAP8L	71.639	0.583	0.737	0.478234	0.374302	1	0.511	FALSE	FALSE	FALSE	nuc	0	0	0	0	0	0	1490300	0	0	0	0	0	0	0	0	1	0	0
105	Delta-1-pyrroline-5-carboxylate synthase OS=Homo sapiens OX=9606 GN=ALDH18A1 PE=1 SV=2	P54886	ALDH18A1	87.301	0.938	0.0812	0.225756	0.912506	1	0.677	FALSE	FALSE	FALSE	mito	686640	771110	0	0	0	814500	0	0	0	1	1	0	0	0	1	0	0	0
106	Fructose-bisphosphate aldolase OS=Homo sapiens OX=9606 GN=ALDOA PE=1 SV=1;Fructose-bisphosphate aldolase A OS=Homo sapiens OX=9606 GN=ALDOA PE=1 SV=2;Fructose-bisphosphate aldolase OS=Homo sapiens OX=9606 GN=ALDOA PE=1 SV=1;Fructose-bisphosphate aldolase A	J3KPS3	ALDOA	39.817	-0.297	-0.533	0.540789	0.28447	1	0.483	FALSE	FALSE	FALSE	cyto	22551000	89254000	38185000	5865700	21569000	14797000	8663000	31898000	9669600	5	9	6	3	4	4	4	6	4
107	Fructose-bisphosphate aldolase C (Fragment) OS=Homo sapiens OX=9606 GN=ALDOC PE=1 SV=1;Fructose-bisphosphate aldolase C (Fragment) OS=Homo sapiens OX=9606 GN=ALDOC PE=1 SV=1;Fructose-bisphosphate aldolase C (Fragment) OS=Homo sapiens OX=9606 GN=ALDOC PE=1	K7EKH5	ALDOC	15.035	0.45	1.28	0.633387	0.194933	1	0.444	FALSE	FALSE	FALSE	nuc	0	6506200	7475000	0	0	3927400	0	6801600	0	0	1	1	0	0	1	0	1	0
108	Alkaline phosphatase, tissue-nonspecific isozyme OS=Homo sapiens OX=9606 GN=ALPL PE=1 SV=4	P05186	ALPL	57.304	1.45	1.01	0.316449	0.477153	1	0.55	FALSE	FALSE	FALSE	cyto	0	0	1278500	0	4878800	3772700	0	11696000	3993600	0	0	1	0	3	3	0	4	3
109	THO complex subunit 4 OS=Homo sapiens OX=9606 GN=ALYREF PE=1 SV=1;THO complex subunit 4 OS=Homo sapiens OX=9606 GN=ALYREF PE=1 SV=3	E9PB61	ALYREF	27.557	0.293	1.34	0.809696	0.287312	1	0.484	FALSE	FALSE	FALSE	nuc	0	0	0	3129800	0	0	0	12130000	2871000	0	1	0	1	0	0	0	2	1
110	Anillin OS=Homo sapiens OX=9606 GN=ANLN PE=1 SV=2	Q9NQW6	ANLN	124.2	0.365	1.29	0.769438	0.313608	1	0.492	FALSE	FALSE	FALSE	nuc	0	0	0	0	0	0	1211600	12878000	371460	0	0	0	0	0	0	2	5	1
111	Acidic leucine-rich nuclear phosphoprotein 32 family member A OS=Homo sapiens OX=9606 GN=ANP32A PE=1 SV=1;Acidic leucine-rich nuclear phosphoprotein 32 family member C OS=Homo sapiens OX=9606 GN=ANP32C PE=2 SV=1;Acidic leucine-rich nuclear phosphoprotein 3	H0YN26	ANP32A	19.997	0.825	1.48	0.360415	0.11846	1	0.379	FALSE	FALSE	FALSE	nuc	0	0	0	0	0	0	0	6154500	0	0	0	0	0	0	0	0	1	0
112	Annexin A1 OS=Homo sapiens OX=9606 GN=ANXA1 PE=1 SV=2;Annexin (Fragment) OS=Homo sapiens OX=9606 GN=ANXA1 PE=1 SV=1;Annexin (Fragment) OS=Homo sapiens OX=9606 GN=ANXA1 PE=1 SV=1	P04083	ANXA1	38.714	0.241	1.44	0.848268	0.271821	1	0.479	FALSE	FALSE	FALSE	cyto	0	2172500	0	0	0	0	1440500	14723000	4064500	0	1	0	0	0	0	1	3	2
113	Annexin A2 OS=Homo sapiens OX=9606 GN=ANXA2 PE=1 SV=2;Annexin (Fragment) OS=Homo sapiens OX=9606 GN=ANXA2 PE=1 SV=1;Annexin (Fragment) OS=Homo sapiens OX=9606 GN=ANXA2 PE=1 SV=1;Annexin OS=Homo sapiens OX=9606 GN=ANXA2 PE=1 SV=1;Putative annexin A2-like pr	P07355	ANXA2	38.604	-0.671	0.109	0.171853	0.814018	1	0.656	FALSE	FALSE	FALSE	other	159040000	296040000	165840000	27776000	166810000	71475000	130490000	308540000	182860000	13	14	12	8	15	10	14	15	13
114	Annexin OS=Homo sapiens OX=9606 GN=ANXA5 PE=1 SV=1;Annexin A5 OS=Homo sapiens OX=9606 GN=ANXA5 PE=1 SV=2;Annexin OS=Homo sapiens OX=9606 GN=ANXA5 PE=1 SV=1;Annexin OS=Homo sapiens OX=9606 GN=ANXA5 PE=1 SV=1	D6RBL5	ANXA5	29.337	0.569	0.805	0.49101	0.33695	1	0.499	FALSE	FALSE	FALSE	nuc	0	0	0	0	876560	0	0	3819900	1231900	0	0	0	0	1	0	0	2	1
115	Annexin A7 OS=Homo sapiens OX=9606 GN=ANXA7 PE=1 SV=3	P20073	ANXA7	52.739	-1.24	1.69	0.323546	0.188281	1	0.44	FALSE	FALSE	FALSE	nuc	7872300	2804600	8138800	0	1623800	2571700	4821500	5913500	8007700	3	2	3	0	1	1	3	3	3
116	Apoptosis inhibitor 5 OS=Homo sapiens OX=9606 GN=API5 PE=1 SV=1;Apoptosis inhibitor 5 OS=Homo sapiens OX=9606 GN=API5 PE=1 SV=1;Apoptosis inhibitor 5 OS=Homo sapiens OX=9606 GN=API5 PE=1 SV=3	E9PQK6	API5	13.841	0.707	0.956	0.432966	0.296036	1	0.486	FALSE	FALSE	FALSE	nuc	0	0	0	0	0	0	1535200	2602800	3313300	0	0	0	0	0	0	1	1	1
117	Archain 1, isoform CRA_a OS=Homo sapiens OX=9606 GN=ARCN1 PE=1 SV=1;Coatomer subunit delta OS=Homo sapiens OX=9606 GN=ARCN1 PE=1 SV=1	B0YIW6	ARCN1	61.626	0.499	0.501	0.560061	0.558074	1	0.582	FALSE	FALSE	FALSE	other	0	0	1455400	0	1578000	2206300	1221900	1433500	0	0	0	1	0	1	1	1	1	0
118	ADP-ribosylation factor 1 OS=Homo sapiens OX=9606 GN=ARF1 PE=1 SV=2;ADP-ribosylation factor 3 OS=Homo sapiens OX=9606 GN=ARF3 PE=1 SV=2;Uncharacterized protein OS=Homo sapiens OX=9606 PE=3 SV=1;ADP-ribosylation factor 3 (Fragment) OS=Homo sapiens OX=9606 G	P84077	ARF1	20.697	1.01	1.07	0.37753	0.348015	1	0.502	FALSE	FALSE	FALSE	cyto	5636200	0	10188000	4590000	4728700	8132500	6008000	8701600	4866100	1	0	2	1	1	1	1	2	1
119	ADP-ribosylation factor 4 OS=Homo sapiens OX=9606 GN=ARF4 PE=1 SV=3;ADP-ribosylation factor 4 (Fragment) OS=Homo sapiens OX=9606 GN=ARF4 PE=1 SV=1;ADP-ribosylation factor 4 OS=Homo sapiens OX=9606 GN=ARF4 PE=1 SV=1	P18085	ARF4	20.511	0.199	0.0643	0.626864	0.874546	1	0.669	FALSE	FALSE	FALSE	other	19009000	14671000	35394000	5746100	11895000	18342000	15416000	40086000	17660000	3	2	2	2	3	2	1	2	4
120	ADP-ribosylation factor 5 (Fragment) OS=Homo sapiens OX=9606 GN=ARF5 PE=1 SV=1;ADP-ribosylation factor 5 OS=Homo sapiens OX=9606 GN=ARF5 PE=1 SV=2	C9J1Z8	ARF5	17.107	0.758	1.29	0.266646	0.0765444	1	0.311	FALSE	FALSE	FALSE	other	0	3477800	0	0	3514500	0	2635100	2985300	0	1	1	1	0	1	1	1	1	0
121	ADP-ribosylation factor-like protein 6-interacting protein 4 (Fragment) OS=Homo sapiens OX=9606 GN=ARL6IP4 PE=1 SV=1;ADP-ribosylation factor-like protein 6-interacting protein 4 (Fragment) OS=Homo sapiens OX=9606 GN=ARL6IP4 PE=1 SV=1;ADP-ribosylation facto	F5GYV5	ARL6IP4	23.687	1.72	0.0539	0.141109	0.960597	1	0.686	FALSE	FALSE	FALSE	nuc	2701000	646080	0	5958200	0	0	674530	2522000	418460	1	1	0	2	0	0	2	2	2
122	Armadillo repeat-containing protein 10 (Fragment) OS=Homo sapiens OX=9606 GN=ARMC10 PE=1 SV=1;Armadillo repeat-containing protein 10 (Fragment) OS=Homo sapiens OX=9606 GN=ARMC10 PE=1 SV=1;Armadillo repeat-containing protein 10 (Fragment) OS=Homo sapiens OX	A0A0J9YWR7	ARMC10	17.035	0.275	-0.208	0.695989	0.76739	1	0.644	FALSE	FALSE	FALSE	mito	0	1263100	1126700	0	0	0	0	0	0	0	1	1	0	0	0	0	0	0
123	Armadillo repeat-containing X-linked protein 2 OS=Homo sapiens OX=9606 GN=ARMCX2 PE=2 SV=1	Q7L311	ARMCX2	65.683	-0.266	-0.935	0.728498	0.241201	1	0.467	FALSE	FALSE	FALSE	mito	1810800	0	1686800	0	0	0	0	0	0	1	0	1	0	0	0	0	0	0
124	Armadillo repeat-containing X-linked protein 3 OS=Homo sapiens OX=9606 GN=ARMCX3 PE=1 SV=1	Q9UH62	ARMCX3	42.5	-0.0687	-0.314	0.952557	0.785966	1	0.649	FALSE	FALSE	FALSE	nuc	5654900	2804600	1384700	0	0	0	0	0	0	3	1	1	0	0	0	0	0	0
125	Activating signal cointegrator 1 complex subunit 3 OS=Homo sapiens OX=9606 GN=ASCC3 PE=1 SV=3	Q8N3C0	ASCC3	251.46	0.76	0.452	0.306513	0.534137	1	0.573	FALSE	FALSE	FALSE	cyto	0	0	387530	0	0	0	0	0	0	0	0	1	0	0	0	0	0	0
126	Histone chaperone ASF1B OS=Homo sapiens OX=9606 GN=ASF1B PE=1 SV=1;Histone chaperone ASF1B OS=Homo sapiens OX=9606 GN=ASF1B PE=1 SV=1	K7ELW9	ASF1B	18.285	1.17	1.36	0.198441	0.143451	1	0.406	FALSE	FALSE	FALSE	nuc	0	0	0	0	0	0	0	0	2312900	0	0	0	0	0	0	0	0	1
127	Argininosuccinate synthase OS=Homo sapiens OX=9606 GN=ASS1 PE=1 SV=2;Argininosuccinate synthase (Fragment) OS=Homo sapiens OX=9606 GN=ASS1 PE=1 SV=1;Argininosuccinate synthase (Fragment) OS=Homo sapiens OX=9606 GN=ASS1 PE=1 SV=1	P00966	ASS1	46.53	-0.173	-2.47	0.838109	0.0161337	1	0.0806	FALSE	FALSE	FALSE	cyto	14095000	9678000	16000000	5845300	6331100	10548000	1632300	17698000	2263400	4	2	3	2	2	2	1	4	1
128	ATPase family AAA domain-containing protein 1 OS=Homo sapiens OX=9606 GN=ATAD1 PE=1 SV=1	Q8NBU5	ATAD1	40.744	-1.74	-2.01	0.159168	0.109777	1	0.368	FALSE	FALSE	FALSE	nuc	4478100	0	7603400	0	0	0	0	0	0	2	1	2	0	0	0	0	0	0
8	ATPase family AAA domain-containing protein 3A OS=Homo sapiens OX=9606 GN=ATAD3A PE=1 SV=2;ATPase family AAA domain-containing protein 3A (Fragment) OS=Homo sapiens OX=9606 GN=ATAD3A PE=1 SV=1;ATPase family AAA domain-containing protein 3B OS=Homo sapiens	Q9NVI7	ATAD3A	71.368	-1.95	-2.46	0.0196459	0.00631525	1	0.0215	FALSE	TRUE	TRUE	mito	2824200	5231700	5344900	1110400	1825200	2421800	0	0	0	1	2	2	1	1	2	0	1	0
129	Atlastin-3 OS=Homo sapiens OX=9606 GN=ATL3 PE=1 SV=1;Atlastin-3 OS=Homo sapiens OX=9606 GN=ATL3 PE=1 SV=1	F5H6I7	ATL3	58.772	-0.396	-1.34	0.508123	0.046597	1	0.226	FALSE	FALSE	FALSE	other	602970	2300900	1854000	340470	531140	1128400	263770	494200	0	1	1	1	1	1	1	1	2	0
9	Sarcoplasmic/endoplasmic reticulum calcium ATPase 2 (Fragment) OS=Homo sapiens OX=9606 GN=ATP2A2 PE=1 SV=1;Sarcoplasmic/endoplasmic reticulum calcium ATPase 2 OS=Homo sapiens OX=9606 GN=ATP2A2 PE=1 SV=1	H7C5W9	ATP2A2	102.48	-3.13	-4.64	0.01019	0.00106754	1	0.000512	FALSE	TRUE	TRUE	other	13497000	18415000	12803000	2595300	4524600	3375600	2481300	0	3034000	3	4	6	3	2	2	1	1	2
130	ATP synthase subunit alpha, mitochondrial OS=Homo sapiens OX=9606 GN=ATP5F1A PE=1 SV=1;ATP synthase subunit alpha, mitochondrial (Fragment) OS=Homo sapiens OX=9606 GN=ATP5F1A PE=1 SV=1;ATP synthase subunit alpha, mitochondrial (Fragment) OS=Homo sapiens OX	P25705	ATP5A1	59.75	-0.0118	-0.577	0.979257	0.225338	1	0.46	FALSE	FALSE	FALSE	other	92779000	52070000	104890000	62228000	51955000	62044000	33435000	59488000	41923000	11	7	11	11	10	10	7	9	7
131	ATP synthase subunit beta, mitochondrial OS=Homo sapiens OX=9606 GN=ATP5F1B PE=1 SV=3;ATP synthase subunit beta (Fragment) OS=Homo sapiens OX=9606 GN=ATP5F1B PE=1 SV=1	P06576	ATP5B	56.559	-0.732	-1.07	0.694826	0.567941	1	0.586	FALSE	FALSE	FALSE	other	11449000	0	7970700	3298800	2216000	1206500	1566800	11481000	0	3	2	2	2	1	1	1	3	0
132	ATP synthase subunit gamma, mitochondrial OS=Homo sapiens OX=9606 GN=ATP5F1C PE=1 SV=1	P36542	ATP5C1	32.996	0.08	-0.333	0.863493	0.480095	1	0.551	FALSE	FALSE	FALSE	other	27878000	18558000	26614000	18968000	17805000	17604000	12285000	22598000	13898000	5	4	5	5	5	4	4	5	5
133	ATPase inhibitor, mitochondrial OS=Homo sapiens OX=9606 GN=ATP5IF1 PE=1 SV=1	Q9UII2	ATPIF1	12.249	0.625	0.821	0.461435	0.339049	1	0.499	FALSE	FALSE	FALSE	other	0	0	0	0	0	0	0	2488500	0	0	0	0	0	0	0	0	1	0
10	Ataxin-2-like protein OS=Homo sapiens OX=9606 GN=ATXN2L PE=1 SV=2;Ataxin-2-like protein OS=Homo sapiens OX=9606 GN=ATXN2L PE=1 SV=1	Q8WWM7	ATXN2L	113.37	-1.78	-2.35	0.00361317	0.000664999	1	0.000152	FALSE	TRUE	TRUE	cyto	4029600	6226200	1800300	469040	1448400	0	417400	267200	0	2	3	2	1	2	1	1	1	0
134	Ancient ubiquitous protein 1 OS=Homo sapiens OX=9606 GN=AUP1 PE=1 SV=2	Q9Y679	AUP1	45.786	0.0818	-0.384	0.899245	0.556449	1	0.581	FALSE	FALSE	FALSE	nuc	0	1208600	1476600	0	0	0	0	0	0	0	1	1	0	0	0	0	0	0
135	Zinc-alpha-2-glycoprotein OS=Homo sapiens OX=9606 GN=AZGP1 PE=1 SV=2;Zinc-alpha-2-glycoprotein OS=Homo sapiens OX=9606 GN=AZGP1 PE=1 SV=1	P25311	AZGP1	34.258	1.05	1.43	0.350542	0.215677	1	0.455	FALSE	FALSE	FALSE	other	0	0	0	0	0	0	0	0	5867400	0	0	0	0	0	0	0	0	2
136	Beta-2-microglobulin (Fragment) OS=Homo sapiens OX=9606 GN=B2M PE=1 SV=1;Beta-2-microglobulin OS=Homo sapiens OX=9606 GN=B2M PE=1 SV=2;Beta-2-microglobulin OS=Homo sapiens OX=9606 GN=B2M PE=1 SV=1	H0YLF3	B2M	8.4984	0.829	0.944	0.311746	0.25326	1	0.472	FALSE	FALSE	FALSE	other	1675100	1500600	0	0	1351400	0	1195800	3002800	0	1	1	0	0	1	0	1	1	0
137	BAG family molecular chaperone regulator 3 (Fragment) OS=Homo sapiens OX=9606 GN=BAG3 PE=1 SV=1;BAG family molecular chaperone regulator 3 OS=Homo sapiens OX=9606 GN=BAG3 PE=1 SV=3	C9JFK9	BAG3	34.759	-0.408	-1.39	0.631186	0.126693	1	0.389	FALSE	FALSE	FALSE	cyto	2267600	2973100	0	0	0	278080	0	0	0	2	2	0	0	0	1	0	0	0
138	Barrier-to-autointegration factor OS=Homo sapiens OX=9606 GN=BANF1 PE=1 SV=1	O75531	BANF1	10.058	1.33	1.3	0.539669	0.548205	1	0.578	FALSE	FALSE	FALSE	nuc	0	0	0	0	17847000	0	0	60959000	0	0	1	0	0	2	0	0	2	0
139	Brain acid soluble protein 1 OS=Homo sapiens OX=9606 GN=BASP1 PE=1 SV=2	P80723	BASP1	22.693	0.106	0.0274	0.874281	0.967495	1	0.687	FALSE	FALSE	FALSE	other	16537000	19957000	28186000	8751500	20189000	13413000	4412600	81784000	5133900	5	6	7	5	7	5	4	9	2
140	Tyrosine-protein kinase BAZ1B OS=Homo sapiens OX=9606 GN=BAZ1B PE=1 SV=2	Q9UIG0	BAZ1B	170.9	0.526	2.12	0.655158	0.0975018	1	0.35	FALSE	FALSE	FALSE	nuc	0	0	0	0	0	0	0	8706400	3493400	0	0	0	0	0	0	0	2	2
141	Bcl-2-like protein 13 OS=Homo sapiens OX=9606 GN=BCL2L13 PE=1 SV=1;Bcl-2-like protein 13 OS=Homo sapiens OX=9606 GN=BCL2L13 PE=1 SV=1;Bcl-2-like protein 13 OS=Homo sapiens OX=9606 GN=BCL2L13 PE=1 SV=1	A0A087WTL4	BCL2L13	48.871	0.938	0.769	0.160387	0.240806	1	0.467	FALSE	FALSE	FALSE	mito	998280	0	0	0	0	0	0	0	0	1	0	0	0	0	0	0	0	0
11	Bcl-2-associated transcription factor 1 OS=Homo sapiens OX=9606 GN=BCLAF1 PE=1 SV=1;Bcl-2-associated transcription factor 1 OS=Homo sapiens OX=9606 GN=BCLAF1 PE=1 SV=2;Bcl-2-associated transcription factor 1 OS=Homo sapiens OX=9606 GN=BCLAF1 PE=1 SV=1;Bcl-	E9PK91	BCLAF1	100.4	0.387	5.07	0.573924	4.85706e-05	1	7.81e-09	FALSE	TRUE	TRUE	nuc	1028200	0	0	0	0	1441000	24025000	20792000	14325000	1	0	0	0	0	1	7	4	4
142	BCL2/adenovirus E1B 19 kDa protein-interacting protein 3 (Fragment) OS=Homo sapiens OX=9606 GN=BNIP3 PE=1 SV=1;BCL2/adenovirus E1B 19 kDa protein-interacting protein 3 (Fragment) OS=Homo sapiens OX=9606 GN=BNIP3 PE=1 SV=1;BCL2/adenovirus E1B 19 kDa protein	F6RP06	BNIP3	23.728	0.697	-0.118	0.261166	0.843088	1	0.662	FALSE	FALSE	FALSE	other	0	314670	0	0	0	0	0	0	0	0	1	0	0	0	0	0	0	0
143	Ribosome biogenesis protein BOP1 OS=Homo sapiens OX=9606 GN=BOP1 PE=1 SV=2	Q14137	BOP1	83.629	0.676	0.704	0.238101	0.221076	1	0.458	FALSE	FALSE	FALSE	nuc	0	0	0	0	0	0	0	1490800	0	0	0	0	0	0	0	0	1	0
144	Ribosome biogenesis protein BRX1 homolog OS=Homo sapiens OX=9606 GN=BRIX1 PE=1 SV=2	Q8TDN6	BRIX1	41.401	2.29	2.43	0.3243	0.297433	1	0.487	FALSE	FALSE	FALSE	other	0	0	0	0	12523000	0	0	110040000	0	0	0	0	0	4	0	0	8	0
145	Bone marrow stromal antigen 2 OS=Homo sapiens OX=9606 GN=BST2 PE=1 SV=1	Q10589	BST2	19.769	0.707	0.672	0.489156	0.510246	1	0.564	FALSE	FALSE	FALSE	other	0	0	0	0	3069500	0	918390	4165900	0	0	0	1	0	1	0	1	1	1
146	Mitotic checkpoint protein BUB3 (Fragment) OS=Homo sapiens OX=9606 GN=BUB3 PE=1 SV=1;Mitotic checkpoint protein BUB3 OS=Homo sapiens OX=9606 GN=BUB3 PE=1 SV=1;Mitotic checkpoint protein BUB3 OS=Homo sapiens OX=9606 GN=BUB3 PE=1 SV=1	J3QT28	BUB3	31.703	0.339	2.95	0.806807	0.0579961	1	0.263	FALSE	FALSE	FALSE	nuc	0	0	0	0	0	0	19077000	4329900	4817200	0	0	0	0	0	0	3	2	3
147	Basic leucine zipper and W2 domain-containing protein 1 (Fragment) OS=Homo sapiens OX=9606 GN=BZW1 PE=1 SV=1;Basic leucine zipper and W2 domain-containing protein 1 (Fragment) OS=Homo sapiens OX=9606 GN=BZW1 PE=1 SV=8;Basic leucine zipper and W2 domain-con	C9JV57	BZW1	13.025	0.572	0.283	0.344464	0.632357	1	0.607	FALSE	FALSE	FALSE	other	0	1173100	0	444250	0	0	0	0	0	0	1	0	1	0	0	0	0	0
148	Chromosome 11 open reading frame 58 (Fragment) OS=Homo sapiens OX=9606 GN=C11orf58 PE=1 SV=1;Chromosome 11 open reading frame 58 OS=Homo sapiens OX=9606 GN=C11orf58 PE=1 SV=2;Small acidic protein OS=Homo sapiens OX=9606 GN=SMAP PE=1 SV=1	E9PRZ9	C11orf58	10.038	0.225	1.3	0.860291	0.323668	1	0.495	FALSE	FALSE	FALSE	other	0	0	0	0	0	0	0	8094000	10751000	0	0	0	0	0	0	0	1	1
149	Chromosome 11 open reading frame 48, isoform CRA_c OS=Homo sapiens OX=9606 GN=C11orf98 PE=1 SV=1	A0A0B4J220	C11orf98	14.234	0.589	0.562	0.454507	0.474714	1	0.549	FALSE	FALSE	FALSE	other	0	0	0	0	0	0	0	1961400	0	0	0	0	0	0	0	0	1	0
150	UPF0688 protein C1orf174 OS=Homo sapiens OX=9606 GN=C1orf174 PE=1 SV=2	Q8IYL3	C1orf174	25.977	0.774	1.14	0.282931	0.127381	1	0.39	FALSE	FALSE	FALSE	nuc	0	0	0	0	0	0	3215100	3455500	0	0	0	0	0	0	0	1	1	0
151	Complement component 1 Q subcomponent-binding protein, mitochondrial OS=Homo sapiens OX=9606 GN=C1QBP PE=1 SV=1	Q07021	C1QBP	31.362	0.616	1.71	0.621372	0.189997	1	0.441	FALSE	FALSE	FALSE	other	10718000	0	0	0	0	0	5778800	15604000	0	1	0	0	0	0	0	1	3	0
152	m-AAA protease-interacting protein 1, mitochondrial (Fragment) OS=Homo sapiens OX=9606 GN=MAIP1 PE=1 SV=1;m-AAA protease-interacting protein 1, mitochondrial OS=Homo sapiens OX=9606 GN=MAIP1 PE=1 SV=1	H7C0V0	C2orf47	25.006	0.648	0.00737	0.336849	0.991022	1	0.692	FALSE	FALSE	FALSE	other	782050	863470	0	0	0	0	0	0	0	1	1	1	0	1	0	0	1	0
153	Calcyclin-binding protein OS=Homo sapiens OX=9606 GN=CACYBP PE=1 SV=2	Q9HB71	CACYBP	26.21	-0.743	-0.203	0.615311	0.89017	1	0.672	FALSE	FALSE	FALSE	cyto	0	11369000	3176900	0	3890900	0	0	8179000	0	0	3	1	0	1	0	0	3	0
154	CAD protein OS=Homo sapiens OX=9606 GN=CAD PE=1 SV=1;CAD protein OS=Homo sapiens OX=9606 GN=CAD PE=1 SV=3	F8VPD4	CAD	236.02	-0.884	-0.754	0.366994	0.438951	1	0.532	FALSE	FALSE	FALSE	cyto	596510	0	3733300	0	0	0	1551900	0	0	1	0	2	0	0	1	1	0	0
155	Caldesmon OS=Homo sapiens OX=9606 GN=CALD1 PE=1 SV=1;Caldesmon OS=Homo sapiens OX=9606 GN=CALD1 PE=1 SV=3	E7EX44	CALD1	64.168	0.143	-0.00584	0.921846	0.996797	1	0.693	FALSE	FALSE	FALSE	other	12662000	13843000	1559700	722150	3073000	3245300	1120000	7101000	4633400	1	1	1	0	1	0	0	0	0
156	Caldesmon OS=Homo sapiens OX=9606 GN=CALD1 PE=1 SV=1;Caldesmon (Fragment) OS=Homo sapiens OX=9606 GN=CALD1 PE=1 SV=1	E9PGZ1	CALD1.1	61.705	0.995	0.346	0.193604	0.635813	1	0.608	FALSE	FALSE	FALSE	other	0	0	659410	0	0	0	0	778670	0	0	0	1	0	0	0	0	1	0
157	Calmodulin-3 OS=Homo sapiens OX=9606 GN=CALM3 PE=1 SV=1;Calmodulin-2 OS=Homo sapiens OX=9606 GN=CALM2 PE=1 SV=1;Calmodulin-1 OS=Homo sapiens OX=9606 GN=CALM1 PE=1 SV=1;Calmodulin-2 (Fragment) OS=Homo sapiens OX=9606 GN=CALM2 PE=1 SV=1;Calmodulin-1 (Fragmen	P0DP25	CALM2	16.837	0.214	1.31	0.858457	0.292147	1	0.485	FALSE	FALSE	FALSE	other	0	0	0	0	2241800	0	0	14935000	0	0	0	0	0	1	0	0	3	0
158	Calmodulin-like protein 5 OS=Homo sapiens OX=9606 GN=CALML5 PE=1 SV=2	Q9NZT1	CALML5	15.892	0.594	1.39	0.439321	0.0924576	1	0.342	FALSE	FALSE	FALSE	cyto	0	0	0	0	0	0	0	0	2755500	0	0	0	0	0	0	0	0	1
159	Calreticulin OS=Homo sapiens OX=9606 GN=CALR PE=1 SV=1;Calreticulin (Fragment) OS=Homo sapiens OX=9606 GN=CALR PE=1 SV=1	P27797	CALR	48.141	0.567	1.37	0.672112	0.318867	1	0.493	FALSE	FALSE	FALSE	other	0	0	5766900	0	0	0	0	19784000	0	0	0	1	0	0	0	0	3	0
160	Calumenin OS=Homo sapiens OX=9606 GN=CALU PE=1 SV=2	O43852	CALU	37.106	0.247	-0.0548	0.575184	0.90008	1	0.674	FALSE	FALSE	FALSE	other	100750000	76886000	110710000	99821000	82171000	96494000	83400000	85581000	87811000	10	8	9	10	9	9	11	9	10
161	Cullin-associated NEDD8-dissociated protein 1 (Fragment) OS=Homo sapiens OX=9606 GN=CAND1 PE=1 SV=1;Cullin-associated NEDD8-dissociated protein 1 OS=Homo sapiens OX=9606 GN=CAND1 PE=1 SV=2	A0A0C4DGH5	CAND1	85.408	0.418	0.848	0.676388	0.40483	1	0.522	FALSE	FALSE	FALSE	other	0	2715300	1894500	0	0	1850600	2731400	1974500	2127400	0	1	2	0	0	1	1	1	1
162	Calnexin OS=Homo sapiens OX=9606 GN=CANX PE=1 SV=2	P27824	CANX	67.567	0.44	-1.5	0.712798	0.229506	1	0.462	FALSE	FALSE	FALSE	other	656800	0	11527000	0	1761800	3547000	0	2029200	1503400	3	0	3	0	1	2	0	1	1
163	Caprin-1 OS=Homo sapiens OX=9606 GN=CAPRIN1 PE=1 SV=1;Caprin-1 OS=Homo sapiens OX=9606 GN=CAPRIN1 PE=1 SV=2;Caprin-1 (Fragment) OS=Homo sapiens OX=9606 GN=CAPRIN1 PE=1 SV=1	G3V153	CAPRIN1	70.353	-0.644	-1.3	0.576865	0.272469	1	0.479	FALSE	FALSE	FALSE	cyto	0	9442600	10250000	1637300	0	0	0	1893600	0	0	3	2	1	0	0	0	1	0
164	F-actin-capping protein subunit beta OS=Homo sapiens OX=9606 GN=CAPZB PE=1 SV=1;F-actin-capping protein subunit beta OS=Homo sapiens OX=9606 GN=CAPZB PE=1 SV=1;F-actin-capping protein subunit beta OS=Homo sapiens OX=9606 GN=CAPZB PE=1 SV=1;F-actin-capping	B1AK87	CAPZB	29.295	1.04	1.37	0.39783	0.272084	1	0.479	FALSE	FALSE	FALSE	other	0	1880500	0	0	4136600	0	0	9366800	4303700	0	1	0	0	1	0	0	2	1
165	Histone-arginine methyltransferase CARM1 OS=Homo sapiens OX=9606 GN=CARM1 PE=1 SV=3;Histone-arginine methyltransferase CARM1 (Fragment) OS=Homo sapiens OX=9606 GN=CARM1 PE=1 SV=1;Histone-arginine methyltransferase CARM1 OS=Homo sapiens OX=9606 GN=CARM1 PE=	Q86X55	CARM1	65.853	0.43	1.8	0.694751	0.125192	1	0.387	FALSE	FALSE	FALSE	nuc	0	0	0	0	0	0	6000100	10232000	0	0	0	0	0	0	0	1	2	0
166	Calpastatin OS=Homo sapiens OX=9606 GN=CAST PE=1 SV=1;Calpastatin OS=Homo sapiens OX=9606 GN=CAST PE=1 SV=1;Calpastatin OS=Homo sapiens OX=9606 GN=CAST PE=1 SV=1;Calpastatin OS=Homo sapiens OX=9606 GN=CAST PE=1 SV=1;Calpastatin (Fragment) OS=Homo sapiens O	A0A0C4DGD1	CAST	21.872	-0.84	-0.853	0.112181	0.107479	1	0.365	FALSE	FALSE	FALSE	cyto	0	1468800	0	0	0	0	0	0	0	0	1	0	0	0	0	0	0	0
167	Catalase OS=Homo sapiens OX=9606 GN=CAT PE=1 SV=3	P04040	CAT	59.755	0.651	0.0746	0.149456	0.859943	1	0.666	FALSE	FALSE	FALSE	other	12792000	35698000	42840000	25711000	43559000	31129000	21099000	29567000	43039000	3	5	5	5	6	4	5	5	7
168	Chromobox protein homolog 3 OS=Homo sapiens OX=9606 GN=CBX3 PE=1 SV=4	Q13185	CBX3	20.811	0.135	1.34	0.900011	0.235109	1	0.464	FALSE	FALSE	FALSE	nuc	0	0	0	0	0	0	0	12715000	4564700	0	0	0	0	0	0	0	3	1
12	Chromobox protein homolog 5 OS=Homo sapiens OX=9606 GN=CBX5 PE=1 SV=1;Chromobox protein homolog 5 (Fragment) OS=Homo sapiens OX=9606 GN=CBX5 PE=1 SV=1	P45973	CBX5	22.225	1.03	4.06	0.410698	0.00850687	1	0.0345	FALSE	TRUE	TRUE	nuc	0	2330400	0	0	2092500	0	1969400	26823000	14096000	0	1	1	0	1	0	1	3	2
169	Chromobox protein homolog 8 (Fragment) OS=Homo sapiens OX=9606 GN=CBX8 PE=1 SV=1;Chromobox protein homolog 8 OS=Homo sapiens OX=9606 GN=CBX8 PE=1 SV=3	C9J6K3	CBX8	27.463	0.766	0.388	0.284472	0.577158	1	0.589	FALSE	FALSE	FALSE	nuc	0	0	0	0	0	260930	526510	370270	375810	0	0	0	0	0	1	1	1	1
170	Cell cycle and apoptosis regulator protein 2 OS=Homo sapiens OX=9606 GN=CCAR2 PE=1 SV=1;Cell cycle and apoptosis regulator protein 2 (Fragment) OS=Homo sapiens OX=9606 GN=CCAR2 PE=1 SV=1;Cell cycle and apoptosis regulator protein 2 OS=Homo sapiens OX=9606	G3V119	CCAR2	67.276	0.684	1.21	0.478712	0.225377	1	0.46	FALSE	FALSE	FALSE	nuc	0	0	0	0	0	0	3006700	0	3194000	0	0	1	0	0	0	2	0	1
171	Coiled-coil domain containing 55, isoform CRA_a OS=Homo sapiens OX=9606 GN=NSRP1 PE=1 SV=1;Nuclear speckle splicing regulatory protein 1 OS=Homo sapiens OX=9606 GN=NSRP1 PE=1 SV=1	A0A024QZ33	CCDC55	60.441	0.234	-0.433	0.725152	0.519454	1	0.567	FALSE	FALSE	FALSE	other	0	0	0	0	0	0	488610	0	0	0	0	0	0	0	0	1	0	0
172	Coiled-coil domain-containing protein 6 OS=Homo sapiens OX=9606 GN=CCDC6 PE=1 SV=2	Q16204	CCDC6	53.29	-1.42	-1.41	0.203405	0.204665	1	0.45	FALSE	FALSE	FALSE	cyto	954450	11511000	0	0	0	0	0	0	0	1	2	0	0	0	0	0	0	0
173	Coiled-coil domain-containing protein 86 OS=Homo sapiens OX=9606 GN=CCDC86 PE=1 SV=1	Q9H6F5	CCDC86	40.235	0.348	0.641	0.711735	0.500829	1	0.56	FALSE	FALSE	FALSE	other	0	0	0	0	0	0	0	1467400	2276800	0	0	0	0	0	0	0	1	1
174	G2/mitotic-specific cyclin-B1 (Fragment) OS=Homo sapiens OX=9606 GN=CCNB1 PE=1 SV=1;G2/mitotic-specific cyclin-B1 (Fragment) OS=Homo sapiens OX=9606 GN=CCNB1 PE=1 SV=1;G2/mitotic-specific cyclin-B1 OS=Homo sapiens OX=9606 GN=CCNB1 PE=1 SV=1	D6RHI0	CCNB1	26.76	0.176	-0.336	0.735159	0.522056	1	0.568	FALSE	FALSE	FALSE	cyto	0	840190	0	0	0	0	0	0	0	0	1	0	0	0	0	0	0	0
175	T-complex protein 1 subunit beta OS=Homo sapiens OX=9606 GN=CCT2 PE=1 SV=4;T-complex protein 1 subunit beta OS=Homo sapiens OX=9606 GN=CCT2 PE=1 SV=1;T-complex protein 1 subunit beta OS=Homo sapiens OX=9606 GN=CCT2 PE=1 SV=2	P78371	CCT2	57.488	-1.95	-0.758	0.121764	0.522124	1	0.568	FALSE	FALSE	FALSE	cyto	4878400	4125900	4120000	1882000	1391600	1387800	5916300	9625700	1589700	3	2	2	2	1	1	3	3	1
176	T-complex protein 1 subunit gamma OS=Homo sapiens OX=9606 GN=CCT3 PE=1 SV=1;T-complex protein 1 subunit gamma OS=Homo sapiens OX=9606 GN=CCT3 PE=1 SV=4;T-complex protein 1 subunit gamma (Fragment) OS=Homo sapiens OX=9606 GN=CCT3 PE=1 SV=1;T-complex protein	B4DUR8	CCT3	55.674	0.412	-0.203	0.688362	0.842452	1	0.662	FALSE	FALSE	FALSE	cyto	4745400	2096800	3007700	1789000	0	1679700	0	3259800	0	2	1	1	1	0	1	0	1	0
177	T-complex protein 1 subunit delta OS=Homo sapiens OX=9606 GN=CCT4 PE=1 SV=4	P50991	CCT4	57.924	1.02	1.27	0.279842	0.184379	1	0.438	FALSE	FALSE	FALSE	cyto	4003900	0	2115200	0	0	0	1736400	4245200	1735600	1	0	1	0	0	1	1	2	1
178	T-complex protein 1 subunit epsilon OS=Homo sapiens OX=9606 GN=CCT5 PE=1 SV=1;T-complex protein 1 subunit epsilon OS=Homo sapiens OX=9606 GN=CCT5 PE=1 SV=1;T-complex protein 1 subunit epsilon OS=Homo sapiens OX=9606 GN=CCT5 PE=1 SV=1;T-complex protein 1 su	E7ENZ3	CCT5	53.848	0.598	0.893	0.467998	0.288185	1	0.484	FALSE	FALSE	FALSE	other	0	0	0	0	0	0	1462200	3192300	0	1	0	0	0	0	0	1	1	0
179	T-complex protein 1 subunit zeta OS=Homo sapiens OX=9606 GN=CCT6A PE=1 SV=3	P40227	CCT6A	58.024	0.705	0.636	0.378667	0.425049	1	0.528	FALSE	FALSE	FALSE	cyto	2554900	0	2051500	1444800	0	1624500	0	1921200	0	1	0	1	1	0	1	0	1	0
180	T-complex protein 1 subunit theta (Fragment) OS=Homo sapiens OX=9606 GN=CCT8 PE=1 SV=1;T-complex protein 1 subunit theta OS=Homo sapiens OX=9606 GN=CCT8 PE=1 SV=4	H7C2U0	CCT8	11.418	0.782	0.56	0.3607	0.507153	1	0.562	FALSE	FALSE	FALSE	other	0	0	0	0	0	0	0	1829000	0	0	0	0	0	0	0	0	1	0
181	Uncharacterized protein OS=Homo sapiens OX=9606 PE=1 SV=1;CD59 glycoprotein (Fragment) OS=Homo sapiens OX=9606 GN=CD59 PE=4 SV=1;CD59 glycoprotein OS=Homo sapiens OX=9606 GN=CD59 PE=1 SV=1	E9PNW4	CD59	11.985	1.01	1.07	0.256366	0.23019	1	0.462	FALSE	FALSE	FALSE	other	0	0	0	0	3912100	2057100	0	4700300	2042200	0	0	0	0	1	1	0	1	1
182	Cell division cycle 2, G1 to S and G2 to M, isoform CRA_a OS=Homo sapiens OX=9606 GN=CDK1 PE=1 SV=1;Cyclin-dependent kinase 1 OS=Homo sapiens OX=9606 GN=CDK1 PE=1 SV=3;Cyclin-dependent kinase 1 (Fragment) OS=Homo sapiens OX=9606 GN=CDK1 PE=1 SV=2;Cyclin-de	A0A024QZP7	CDC2	34.081	0.141	-1.44	0.925133	0.351493	1	0.503	FALSE	FALSE	FALSE	other	0	0	13985000	0	1686200	15609000	8521900	5316900	1475400	0	0	3	1	1	3	1	2	1
183	Hsp90 co-chaperone Cdc37 (Fragment) OS=Homo sapiens OX=9606 GN=CDC37 PE=1 SV=1;Hsp90 co-chaperone Cdc37 (Fragment) OS=Homo sapiens OX=9606 GN=CDC37 PE=1 SV=1;Hsp90 co-chaperone Cdc37 OS=Homo sapiens OX=9606 GN=CDC37 PE=1 SV=1	K7EQA9	CDC37	27.435	-0.861	-0.838	0.279596	0.291942	1	0.485	FALSE	FALSE	FALSE	cyto	0	2800600	0	0	0	0	0	0	0	0	1	0	0	0	0	0	0	0
184	Cell division control protein 42 homolog OS=Homo sapiens OX=9606 GN=CDC42 PE=1 SV=2	P60953	CDC42	21.258	-0.842	-1.78	0.395333	0.0926999	1	0.342	FALSE	FALSE	FALSE	cyto	4767400	6538700	2364700	0	0	0	2101400	0	0	1	2	1	0	0	0	0	0	0
13	Cell division cycle-associated protein 2 OS=Homo sapiens OX=9606 GN=CDCA2 PE=1 SV=1;Cell division cycle-associated protein 2 OS=Homo sapiens OX=9606 GN=CDCA2 PE=1 SV=2	E9PEI0	CDCA2	111.01	0.692	3.64	0.395765	0.00137662	1	0.000938	FALSE	TRUE	TRUE	nuc	0	1223800	0	0	0	0	4033600	7514100	5738900	0	1	0	0	0	0	2	3	3
185	CDKN2A-interacting protein OS=Homo sapiens OX=9606 GN=CDKN2AIP PE=1 SV=3	Q9NXV6	CDKN2AIP	61.124	0.565	2.17	0.471597	0.0191845	1	0.0972	FALSE	FALSE	FALSE	nuc	0	0	0	0	0	0	2969400	2712000	3768300	0	0	0	0	0	0	4	1	3
186	CCAAT/enhancer-binding protein beta OS=Homo sapiens OX=9606 GN=CEBPB PE=1 SV=2	P17676	CEBPB	36.105	0.0957	0.289	0.909694	0.732483	1	0.636	FALSE	FALSE	FALSE	nuc	0	0	0	0	0	0	1302000	1918300	0	0	0	0	0	0	0	1	1	0
187	Putative cat eye syndrome critical region protein 9 OS=Homo sapiens OX=9606 GN=CECR9 PE=5 SV=1	P0C854	CECR9	23.602	0.423	2.65	0.845854	0.243341	1	0.468	FALSE	FALSE	FALSE	other	183780000	0	264800000	231050000	144430000	0	153110000	192540000	0	1	0	1	1	1	0	1	1	0
188	CUGBP Elav-like family member 1 (Fragment) OS=Homo sapiens OX=9606 GN=CELF1 PE=1 SV=1;CUGBP Elav-like family member 1 (Fragment) OS=Homo sapiens OX=9606 GN=CELF1 PE=1 SV=1;CUGBP Elav-like family member 1 (Fragment) OS=Homo sapiens OX=9606 GN=CELF1 PE=1 SV=	E9PQK4	CELF1	9.9402	0.569	-0.0285	0.464445	0.970296	1	0.688	FALSE	FALSE	FALSE	nuc	0	0	0	0	0	0	0	1761700	0	0	0	0	0	0	0	0	1	0
189	Cofilin-1 OS=Homo sapiens OX=9606 GN=CFL1 PE=1 SV=3;Cofilin 1 (Non-muscle), isoform CRA_a OS=Homo sapiens OX=9606 GN=CFL1 PE=1 SV=1;Cofilin-1 OS=Homo sapiens OX=9606 GN=CFL1 PE=1 SV=1;Cofilin-1 (Fragment) OS=Homo sapiens OX=9606 GN=CFL1 PE=1 SV=8	P23528	CFL1	18.502	0.072	0.672	0.869379	0.150873	1	0.413	FALSE	FALSE	FALSE	cyto	28621000	27646000	26856000	16173000	34592000	18396000	30880000	66235000	53578000	4	5	5	5	6	4	7	6	7
190	MICOS complex subunit OS=Homo sapiens OX=9606 GN=CHCHD3 PE=1 SV=2;MICOS complex subunit MIC19 OS=Homo sapiens OX=9606 GN=CHCHD3 PE=1 SV=1	C9JRZ6	CHCHD3	26.753	0.261	-0.929	0.651475	0.131961	1	0.395	FALSE	FALSE	FALSE	mito	0	0	0	1014800	0	0	0	0	0	0	0	0	1	0	0	0	0	0
191	Chromodomain-helicase-DNA-binding protein 4 (Fragment) OS=Homo sapiens OX=9606 GN=CHD4 PE=1 SV=1;Chromodomain-helicase-DNA-binding protein 4 (Fragment) OS=Homo sapiens OX=9606 GN=CHD4 PE=1 SV=1;Chromodomain-helicase-DNA-binding protein 4 (Fragment) OS=Homo	A0A2R8YE38	CHD4	52.145	0.373	0.791	0.698992	0.419694	1	0.526	FALSE	FALSE	FALSE	nuc	902730	791890	1502200	0	0	845760	1631300	2357400	1948200	1	1	1	0	0	1	1	1	2
192	Cysteine and histidine-rich domain-containing protein 1 OS=Homo sapiens OX=9606 GN=CHORDC1 PE=1 SV=2;Cysteine and histidine-rich domain-containing protein 1 OS=Homo sapiens OX=9606 GN=CHORDC1 PE=1 SV=1;Cysteine and histidine-rich domain-containing protein	Q9UHD1	CHORDC1	37.489	-1.14	-0.13	0.150981	0.861153	1	0.666	FALSE	FALSE	FALSE	cyto	6854000	17238000	12220000	531600	2711800	6027100	2952800	5620200	7791600	3	5	3	1	2	3	2	2	3
193	Chromatin target of PRMT1 protein OS=Homo sapiens OX=9606 GN=CHTOP PE=1 SV=1;Chromatin target of PRMT1 protein OS=Homo sapiens OX=9606 GN=CHTOP PE=1 SV=1;Chromatin target of PRMT1 protein OS=Homo sapiens OX=9606 GN=CHTOP PE=1 SV=2	A0A087X1B7	CHTOP	8.5199	0.369	0.252	0.633665	0.74405	1	0.639	FALSE	FALSE	FALSE	nuc	0	1815100	0	0	0	0	0	1990800	0	0	1	0	0	0	0	0	1	0
194	Fe-S cluster assembly protein DRE2 OS=Homo sapiens OX=9606 GN=CIAPIN1 PE=1 SV=1;Anamorsin OS=Homo sapiens OX=9606 GN=CIAPIN1 PE=1 SV=1;Anamorsin OS=Homo sapiens OX=9606 GN=CIAPIN1 PE=1 SV=2;Anamorsin OS=Homo sapiens OX=9606 GN=CIAPIN1 PE=1 SV=1;Anamorsin O	H3BV90	CIAPIN1	26.446	-2.35	0.597	0.0107832	0.428468	1	0.529	FALSE	FALSE	FALSE	mito	5819600	13336000	6727200	1089600	1140200	3755800	9810400	23888000	17840000	2	3	3	1	1	2	3	5	4
195	Corepressor interacting with RBPJ 1 OS=Homo sapiens OX=9606 GN=CIR1 PE=1 SV=1	Q86X95	CIR1	52.313	0.693	0.644	0.498907	0.528962	1	0.571	FALSE	FALSE	FALSE	nuc	742240	1179000	0	1585000	1152100	0	1979700	0	286360	1	1	0	2	2	0	2	0	1
196	Cold-inducible RNA-binding protein (Fragment) OS=Homo sapiens OX=9606 GN=CIRBP PE=1 SV=2;Cold-inducible RNA-binding protein (Fragment) OS=Homo sapiens OX=9606 GN=CIRBP PE=1 SV=2;Cold-inducible RNA-binding protein (Fragment) OS=Homo sapiens OX=9606 GN=CIRBP	K7ENX8	CIRBP	8.9138	0.564	2.05	0.619907	0.0973743	1	0.35	FALSE	FALSE	FALSE	nuc	0	0	0	0	0	0	3138700	12056000	11099000	0	0	0	0	0	0	1	2	3
197	CDGSH iron-sulfur domain-containing protein 1 OS=Homo sapiens OX=9606 GN=CISD1 PE=1 SV=1	Q9NZ45	CISD1	12.199	-2.81	-3.06	0.0270343	0.0185975	1	0.0941	FALSE	FALSE	FALSE	mito	8907600	16172000	4074000	0	0	0	0	0	0	2	3	1	0	0	1	0	0	0
198	CDGSH iron-sulfur domain-containing protein 2 OS=Homo sapiens OX=9606 GN=CISD2 PE=1 SV=1;CDGSH iron-sulfur domain-containing protein 2 OS=Homo sapiens OX=9606 GN=CISD2 PE=1 SV=1	D6RCF4	CISD2	16.074	0.329	0.572	0.641408	0.423704	1	0.528	FALSE	FALSE	FALSE	other	0	3041300	2208200	0	1199700	0	1391200	2211100	1318900	0	1	1	0	1	0	1	1	1
199	Cytoskeleton-associated protein 4 OS=Homo sapiens OX=9606 GN=CKAP4 PE=1 SV=2	Q07065	CKAP4	66.022	0.0677	-0.205	0.939633	0.81892	1	0.657	FALSE	FALSE	FALSE	other	2702100	0	0	0	781030	0	0	1276600	0	2	0	0	0	1	0	0	1	0
200	Creatine kinase B-type OS=Homo sapiens OX=9606 GN=CKB PE=1 SV=1;Creatine kinase B-type (Fragment) OS=Homo sapiens OX=9606 GN=CKB PE=1 SV=1;Creatine kinase B-type (Fragment) OS=Homo sapiens OX=9606 GN=CKB PE=1 SV=1	P12277	CKB	42.644	0.888	1.33	0.443491	0.262238	1	0.475	FALSE	FALSE	FALSE	cyto	1413600	2887900	0	972630	3759000	0	1389900	9307000	0	1	1	1	1	2	0	1	3	1
201	Chloride channel CLIC-like protein 1 OS=Homo sapiens OX=9606 GN=CLCC1 PE=1 SV=1	Q96S66	CLCC1	62.022	0.368	0.579	0.594623	0.408281	1	0.523	FALSE	FALSE	FALSE	other	361110	431330	482330	0	0	0	0	0	0	1	1	1	0	0	0	0	0	0
202	Clathrin interactor 1 OS=Homo sapiens OX=9606 GN=CLINT1 PE=1 SV=1	Q14677	CLINT1	68.259	0.697	0.0101	0.256474	0.986308	1	0.691	FALSE	FALSE	FALSE	other	0	0	0	0	1018200	1081800	0	0	0	0	0	0	0	1	1	0	0	0
203	Clathrin heavy chain OS=Homo sapiens OX=9606 GN=CLTC PE=1 SV=1;Clathrin heavy chain 1 OS=Homo sapiens OX=9606 GN=CLTC PE=1 SV=5	A0A087WVQ6	CLTC	192.06	-0.147	-2.55	0.917797	0.100745	1	0.355	FALSE	FALSE	FALSE	other	5013500	0	7955000	0	0	10889000	0	0	0	4	0	4	0	0	6	0	0	0
204	Clusterin (Fragment) OS=Homo sapiens OX=9606 GN=CLU PE=1 SV=1;Clusterin OS=Homo sapiens OX=9606 GN=CLU PE=1 SV=1;Clusterin (Fragment) OS=Homo sapiens OX=9606 GN=CLU PE=1 SV=1	H0YC35	CLU	33.419	1.09	0.921	0.191122	0.26076	1	0.475	FALSE	FALSE	FALSE	cyto	2015500	0	3562300	1854900	0	2036500	1214600	0	0	2	0	1	1	1	1	1	0	0
205	Calponin OS=Homo sapiens OX=9606 GN=CNN2 PE=1 SV=1;Calponin OS=Homo sapiens OX=9606 GN=CNN2 PE=1 SV=1;Calponin-2 OS=Homo sapiens OX=9606 GN=CNN2 PE=1 SV=4;Calponin (Fragment) OS=Homo sapiens OX=9606 GN=CNN2 PE=1 SV=1;Calponin (Fragment) OS=Homo sapiens OX=	B4DDF4	CNN2	32.616	-5.17	0.225	7.3669e-06	0.679928	1	0.621	FALSE	FALSE	FALSE	cyto	22840000	42729000	26970000	0	2195600	0	22203000	38598000	47574000	5	7	6	1	2	2	5	5	8
206	Collagen alpha-5(VI) chain (Fragment) OS=Homo sapiens OX=9606 GN=COL6A5 PE=1 SV=1	H0Y935	COL6A5	88.613	0.627	2.86	0.722119	0.130715	1	0.394	FALSE	FALSE	FALSE	other	0	0	0	0	0	0	0	0	82454000	0	0	0	0	0	0	0	0	1
207	Coatomer subunit beta (Fragment) OS=Homo sapiens OX=9606 GN=COPB1 PE=1 SV=8;Coatomer subunit beta OS=Homo sapiens OX=9606 GN=COPB1 PE=1 SV=3	E9PP73	COPB1	55.438	0.181	-0.197	0.732932	0.711314	1	0.63	FALSE	FALSE	FALSE	cyto	528770	1573400	938180	0	342750	508050	0	0	0	1	1	1	0	1	2	0	0	0
208	Cytochrome c oxidase copper chaperone OS=Homo sapiens OX=9606 GN=COX17 PE=1 SV=1;Cytochrome c oxidase copper chaperone OS=Homo sapiens OX=9606 GN=COX17 PE=1 SV=2;Cytochrome c oxidase copper chaperone (Fragment) OS=Homo sapiens OX=9606 GN=COX17 PE=1 SV=1	C9J8T6	COX17	10.853	-0.903	-0.446	0.11325	0.406246	1	0.522	FALSE	FALSE	FALSE	mito	10920000	11639000	10231000	3399800	3431900	6136900	6899300	5527500	8376400	1	1	1	1	2	1	1	1	1
209	COX4I1 protein OS=Homo sapiens OX=9606 GN=COX4I1 PE=1 SV=1;Cytochrome c oxidase subunit 4 isoform 1, mitochondrial OS=Homo sapiens OX=9606 GN=COX4I1 PE=1 SV=1;Cytochrome c oxidase subunit 4 isoform 1, mitochondrial OS=Homo sapiens OX=9606 GN=COX4I1 PE=1 SV	Q86WV2	COX4I1	9.2906	-0.29	-0.615	0.614162	0.296932	1	0.487	FALSE	FALSE	FALSE	mito	2440500	1563700	0	0	0	0	0	0	0	1	1	0	0	0	0	0	0	0
210	Carbamoyl-phosphate synthase [ammonia], mitochondrial OS=Homo sapiens OX=9606 GN=CPS1 PE=1 SV=2	P31327	CPS1	164.94	0.112	-0.409	0.855728	0.513473	1	0.565	FALSE	FALSE	FALSE	nuc	563070000	233220000	572580000	340500000	186360000	400890000	296520000	203350000	223500000	38	30	35	33	27	36	33	29	29
211	Cleavage and polyadenylation-specificity factor subunit 6 OS=Homo sapiens OX=9606 GN=CPSF6 PE=1 SV=1;Cleavage and polyadenylation specificity factor subunit 6 OS=Homo sapiens OX=9606 GN=CPSF6 PE=1 SV=2;Cleavage and polyadenylation-specificity factor subuni	F8WJN3	CPSF6	52.269	0.802	2.99	0.501818	0.0299415	1	0.154	FALSE	FALSE	FALSE	nuc	0	0	0	0	0	0	9320500	3714200	3615400	0	0	0	0	0	0	2	1	2
212	Cleavage and polyadenylation-specificity factor subunit 7 (Fragment) OS=Homo sapiens OX=9606 GN=CPSF7 PE=1 SV=1;Cleavage and polyadenylation specificity factor subunit 7 OS=Homo sapiens OX=9606 GN=CPSF7 PE=1 SV=1	F5H669	CPSF7	41.265	0.558	2.24	0.581282	0.0491784	1	0.235	FALSE	FALSE	FALSE	nuc	0	0	0	0	0	0	3506300	1988000	3801200	0	0	0	0	0	0	2	1	3
14	Carnitine O-palmitoyltransferase 1, liver isoform OS=Homo sapiens OX=9606 GN=CPT1A PE=1 SV=2	P50416	CPT1A	88.367	-2.75	-2.94	0.000755709	0.000481255	1	5.96e-05	FALSE	TRUE	TRUE	mito	6030800	4450700	8149200	0	0	2145300	0	0	0	2	2	2	0	0	2	0	0	0
213	cAMP-responsive element modulator OS=Homo sapiens OX=9606 GN=CREM PE=1 SV=1;cAMP-responsive element modulator OS=Homo sapiens OX=9606 GN=CREM PE=1 SV=2;Cyclic AMP-dependent transcription factor ATF-1 OS=Homo sapiens OX=9606 GN=ATF1 PE=1 SV=2;Cyclic AMP-res	E9PAR2	CREM	10.918	0.463	0.426	0.581343	0.611012	1	0.6	FALSE	FALSE	FALSE	nuc	0	0	0	0	0	0	0	2392600	0	0	0	0	0	0	0	0	1	0
214	Exportin-2 OS=Homo sapiens OX=9606 GN=CSE1L PE=1 SV=3	P55060	CSE1L	110.42	-1.61	0.362	0.0612393	0.6397	1	0.609	FALSE	FALSE	FALSE	nuc	1009100	2699600	3690800	0	686410	1558700	1373700	4251200	3931700	1	2	2	0	2	1	1	2	2
215	Cysteine and glycine-rich protein 1 OS=Homo sapiens OX=9606 GN=CSRP1 PE=1 SV=3;Cysteine and glycine-rich protein 1 OS=Homo sapiens OX=9606 GN=CSRP1 PE=1 SV=1;Cysteine and glycine-rich protein 1 (Fragment) OS=Homo sapiens OX=9606 GN=CSRP1 PE=1 SV=1;Cysteine	P21291	CSRP1	20.567	-0.757	0.374	0.111637	0.404369	1	0.521	FALSE	FALSE	FALSE	other	40154000	36272000	24525000	5206900	10276000	17062000	19463000	35590000	46665000	5	4	4	2	2	3	3	3	5
216	Cysteine and glycine-rich protein 2 OS=Homo sapiens OX=9606 GN=CSRP2 PE=1 SV=1;Cysteine and glycine-rich protein 2 OS=Homo sapiens OX=9606 GN=CSRP2 PE=1 SV=3;Cysteine and glycine-rich protein 2 OS=Homo sapiens OX=9606 GN=CSRP2 PE=1 SV=1	F8VQR7	CSRP2	20.677	-1.75	-1.64	0.0550497	0.0695455	1	0.295	FALSE	FALSE	FALSE	other	4639900	4312300	0	1177900	0	2484500	3346300	0	2690300	2	2	0	1	1	1	1	0	1
217	Catenin (Cadherin-associated protein), alpha 1, 102kDa, isoform CRA_a OS=Homo sapiens OX=9606 GN=CTNNA1 PE=1 SV=1;Catenin alpha-1 OS=Homo sapiens OX=9606 GN=CTNNA1 PE=1 SV=1	G3XAM7	CTNNA1	92.721	0.405	-0.431	0.652914	0.632825	1	0.607	FALSE	FALSE	FALSE	other	0	539230	0	0	0	0	0	0	0	0	1	1	0	0	0	0	0	0
218	CTP synthase OS=Homo sapiens OX=9606 GN=CTPS1 PE=1 SV=1;CTP synthase 1 OS=Homo sapiens OX=9606 GN=CTPS1 PE=1 SV=2;CTP synthase OS=Homo sapiens OX=9606 GN=CTPS1 PE=1 SV=1;CTP synthase OS=Homo sapiens OX=9606 GN=CTPS1 PE=1 SV=1;CTP synthase OS=Homo sapiens O	A0A3B3IRI2	CTPS1	63.723	-0.296	-0.434	0.833415	0.758254	1	0.642	FALSE	FALSE	FALSE	cyto	2504400	33406000	8027500	852610	8965400	6162300	6558000	10418000	1867300	2	7	3	2	6	5	4	4	2
219	Src substrate cortactin OS=Homo sapiens OX=9606 GN=CTTN PE=1 SV=2	Q14247	CTTN	61.585	-1.01	-1.22	0.0380332	0.0171794	1	0.0864	FALSE	FALSE	FALSE	cyto	73055000	131780000	91192000	14380000	19624000	37817000	14711000	25090000	16880000	10	13	12	5	5	7	5	6	6
220	NADH-cytochrome b5 reductase 3 (Fragment) OS=Homo sapiens OX=9606 GN=CYB5R3 PE=1 SV=1;NADH-cytochrome b5 reductase 3 OS=Homo sapiens OX=9606 GN=CYB5R3 PE=1 SV=3	B1AHF3	CYB5R3	16.696	0.82	0.301	0.336047	0.717274	1	0.632	FALSE	FALSE	FALSE	other	0	0	4701300	1480300	0	0	0	0	0	1	0	1	1	0	0	0	0	0
221	Cytochrome c1, heme protein, mitochondrial OS=Homo sapiens OX=9606 GN=CYC1 PE=1 SV=3	P08574	CYC1	35.422	0.77	-0.0299	0.401926	0.973471	1	0.689	FALSE	FALSE	FALSE	mito	2736700	893120	780980	0	1913400	374270	0	397770	0	2	1	2	0	2	1	0	1	0
222	Cytochrome c (Fragment) OS=Homo sapiens OX=9606 GN=CYCS PE=1 SV=1;Cytochrome c OS=Homo sapiens OX=9606 GN=CYCS PE=1 SV=2	C9JFR7	CYCS	11.333	-1.07	-1.24	0.231093	0.168761	1	0.427	FALSE	FALSE	FALSE	mito	3297900	3092500	1904600	0	1258200	0	0	2624800	0	2	2	2	0	1	0	0	1	0
223	Lanosterol 14-alpha demethylase OS=Homo sapiens OX=9606 GN=CYP51A1 PE=1 SV=1;Lanosterol 14-alpha demethylase OS=Homo sapiens OX=9606 GN=CYP51A1 PE=1 SV=3	A0A0C4DFL7	CYP51A1	57.278	0.17	-0.334	0.696738	0.44978	1	0.537	FALSE	FALSE	FALSE	other	34078000	27960000	29974000	19820000	22692000	30143000	16127000	12992000	11524000	6	5	5	5	6	6	5	2	3
224	Disabled homolog 2 OS=Homo sapiens OX=9606 GN=DAB2 PE=1 SV=3	P98082	DAB2	82.447	-0.382	-0.358	0.692415	0.710613	1	0.63	FALSE	FALSE	FALSE	other	1116900	1070600	2696700	0	0	982930	0	0	0	1	1	2	0	0	1	0	0	0
15	DAZ-associated protein 1 (Fragment) OS=Homo sapiens OX=9606 GN=DAZAP1 PE=1 SV=2;DAZ-associated protein 1 OS=Homo sapiens OX=9606 GN=DAZAP1 PE=1 SV=2;DAZ-associated protein 1 OS=Homo sapiens OX=9606 GN=DAZAP1 PE=1 SV=2;DAZ-associated protein 1 OS=Homo sapie	K7EQ02	DAZAP1	35.02	0.727	6.32	0.16997	7.92741e-07	1	1.11e-14	FALSE	TRUE	TRUE	nuc	0	0	0	0	0	0	20037000	59138000	36568000	0	0	0	0	0	0	5	5	4
225	Dermcidin OS=Homo sapiens OX=9606 GN=DCD PE=1 SV=2	P81605	DCD	11.284	0.795	0.959	0.328514	0.244563	1	0.468	FALSE	FALSE	FALSE	other	0	0	0	0	1896200	0	0	1854800	0	0	0	0	0	1	0	0	1	0
16	Probable ATP-dependent RNA helicase DDX17 OS=Homo sapiens OX=9606 GN=DDX17 PE=1 SV=1;Probable ATP-dependent RNA helicase DDX17 OS=Homo sapiens OX=9606 GN=DDX17 PE=1 SV=1;Probable ATP-dependent RNA helicase DDX17 OS=Homo sapiens OX=9606 GN=DDX17 PE=1 SV=2	A0A1X7SBZ2	DDX17	80.253	-0.000618	6.82	0.999213	2.66938e-06	1	1.11e-14	FALSE	TRUE	TRUE	nuc	0	2709900	0	2015200	1786300	1610600	46968000	64735000	71569000	0	1	1	1	1	1	10	9	11
226	Nucleolar RNA helicase 2 OS=Homo sapiens OX=9606 GN=DDX21 PE=1 SV=5	Q9NR30	DDX21	87.343	1.64	1.38	0.460995	0.532948	1	0.573	FALSE	FALSE	FALSE	other	0	1298600	0	0	14476000	0	0	110720000	1117400	0	2	0	0	9	0	0	17	1
227	ATP-dependent RNA helicase DDX24 OS=Homo sapiens OX=9606 GN=DDX24 PE=1 SV=1;ATP-dependent RNA helicase DDX24 OS=Homo sapiens OX=9606 GN=DDX24 PE=1 SV=1;ATP-dependent RNA helicase DDX24 OS=Homo sapiens OX=9606 GN=DDX24 PE=1 SV=1	G3V529	DDX24	91.48	1.11	1.63	0.380356	0.209694	1	0.452	FALSE	FALSE	FALSE	other	0	0	0	0	0	0	0	14325000	0	0	0	0	0	0	0	0	5	0
228	ATP-dependent RNA helicase DDX39A OS=Homo sapiens OX=9606 GN=DDX39A PE=1 SV=2;Spliceosome RNA helicase DDX39B OS=Homo sapiens OX=9606 GN=DDX39B PE=1 SV=2;Spliceosome RNA helicase DDX39B OS=Homo sapiens OX=9606 GN=DDX39B PE=1 SV=1	O00148	DDX39A	49.129	-1.25	1.37	0.302829	0.261277	1	0.475	FALSE	FALSE	FALSE	nuc	4822600	8329600	8539200	1308200	5300700	1776300	6024300	23017000	12677000	2	4	2	1	2	1	2	4	4
229	ATP-dependent RNA helicase DDX3X OS=Homo sapiens OX=9606 GN=DDX3X PE=1 SV=1;ATP-dependent RNA helicase DDX3X OS=Homo sapiens OX=9606 GN=DDX3X PE=1 SV=1;ATP-dependent RNA helicase DDX3X OS=Homo sapiens OX=9606 GN=DDX3X PE=1 SV=1;ATP-dependent RNA helicase D	A0A2R8Y5G6	DDX3X	69.047	-0.723	-1.35	0.112385	0.0102707	1	0.0453	FALSE	FALSE	FALSE	cyto	62975000	96438000	76624000	18186000	27690000	33177000	7447200	29131000	11629000	12	12	12	5	7	8	3	7	4
230	ATP-dependent RNA helicase DDX42 OS=Homo sapiens OX=9606 GN=DDX42 PE=1 SV=1;ATP-dependent RNA helicase DDX42 OS=Homo sapiens OX=9606 GN=DDX42 PE=1 SV=1	A0A0A0MSJ0	DDX42	77.813	0.266	0.74	0.792975	0.471955	1	0.548	FALSE	FALSE	FALSE	nuc	0	0	0	0	0	0	2228500	735660	847320	0	0	0	0	0	0	2	2	1
231	Probable ATP-dependent RNA helicase DDX46 OS=Homo sapiens OX=9606 GN=DDX46 PE=1 SV=1;Probable ATP-dependent RNA helicase DDX46 OS=Homo sapiens OX=9606 GN=DDX46 PE=1 SV=2	A0A0C4DG89	DDX46	117.46	1.41	2.2	0.315846	0.132608	1	0.396	FALSE	FALSE	FALSE	nuc	557190	0	0	3087500	0	0	10086000	3102000	1481000	1	0	0	2	0	0	5	2	1
232	Probable ATP-dependent RNA helicase DDX5 OS=Homo sapiens OX=9606 GN=DDX5 PE=1 SV=1;Probable ATP-dependent RNA helicase DDX5 OS=Homo sapiens OX=9606 GN=DDX5 PE=1 SV=1	J3KTA4	DDX5	69.086	0.261	1.4	0.52498	0.00687674	1	0.0247	FALSE	FALSE	FALSE	nuc	82410000	110960000	156820000	72638000	124870000	112420000	307920000	465990000	306400000	8	10	11	9	13	7	14	14	13
233	ATP-dependent RNA helicase DDX54 OS=Homo sapiens OX=9606 GN=DDX54 PE=1 SV=2	Q8TDD1	DDX54	98.594	-0.0707	-0.00344	0.902528	0.995248	1	0.693	FALSE	FALSE	FALSE	nuc	0	0	0	957690	0	0	811450	1219600	0	0	0	0	1	0	0	1	1	0
234	cDNA FLJ53031, highly similar to Protein DEK OS=Homo sapiens OX=9606 GN=DEK PE=1 SV=1;Protein DEK OS=Homo sapiens OX=9606 GN=DEK PE=1 SV=1;Protein DEK OS=Homo sapiens OX=9606 GN=DEK PE=1 SV=2;Protein DEK (Fragment) OS=Homo sapiens OX=9606 GN=DEK PE=1 SV=1	B4DFG0	DEK	39.5	0.193	2.37	0.865193	0.0630529	1	0.278	FALSE	FALSE	FALSE	nuc	0	0	0	0	0	0	5875600	0	10337000	0	0	0	0	0	0	4	0	4
17	Pre-mRNA-splicing factor ATP-dependent RNA helicase DHX15 OS=Homo sapiens OX=9606 GN=DHX15 PE=1 SV=2	O43143	DHX15	90.932	-1.11	5.02	0.226973	0.000315434	1	1.63e-05	FALSE	TRUE	TRUE	nuc	1759500	5476200	2155900	0	0	0	34059000	62678000	36833000	2	3	1	0	0	0	11	12	11
18	ATP-dependent RNA helicase A OS=Homo sapiens OX=9606 GN=DHX9 PE=1 SV=4	Q08211	DHX9	140.96	1.7	5.83	0.139396	0.000439472	1	4.59e-05	FALSE	TRUE	TRUE	nuc	0	0	2394200	0	2753400	2036300	4883500	72112000	33291000	0	0	2	0	2	1	4	15	8
235	Death-inducer obliterator 1 OS=Homo sapiens OX=9606 GN=DIDO1 PE=1 SV=5	Q9BTC0	DIDO1	243.87	0.447	0.911	0.63142	0.33925	1	0.499	FALSE	FALSE	FALSE	nuc	0	0	0	0	0	0	1989400	0	0	0	0	0	0	0	0	2	0	0
236	H/ACA ribonucleoprotein complex subunit DKC1 OS=Homo sapiens OX=9606 GN=DKC1 PE=1 SV=3;H/ACA ribonucleoprotein complex subunit DKC1 (Fragment) OS=Homo sapiens OX=9606 GN=DKC1 PE=1 SV=1;H/ACA ribonucleoprotein complex subunit DKC1 (Fragment) OS=Homo sapiens	O60832	DKC1	57.673	0.982	1.14	0.341281	0.273968	1	0.479	FALSE	FALSE	FALSE	nuc	0	0	0	0	0	0	0	5128200	0	0	0	0	0	0	0	0	2	0
237	Epididymis luminal protein 189 OS=Homo sapiens OX=9606 GN=TPM3 PE=1 SV=1;Tropomyosin alpha-3 chain OS=Homo sapiens OX=9606 GN=TPM3 PE=1 SV=2;Tropomyosin alpha-3 chain OS=Homo sapiens OX=9606 GN=TPM3 PE=1 SV=1;Tropomyosin alpha-3 chain OS=Homo sapiens OX=96	Q5HYB6	DKFZp686J1372	27.175	1.58	2.23	0.477005	0.323831	1	0.495	FALSE	FALSE	FALSE	other	2929200	5402800	6420400	1187400	26185000	3117600	4265800	55786000	6701600	0	1	0	0	1	0	1	3	0
238	Dihydrolipoyllysine-residue succinyltransferase component of 2-oxoglutarate dehydrogenase complex, mitochondrial OS=Homo sapiens OX=9606 GN=DLST PE=1 SV=4;Dihydrolipoyllysine-residue succinyltransferase component of 2-oxoglutarate dehydrogenase complex, mi	P36957	DLST	48.755	0.701	0.23	0.32419	0.739681	1	0.637	FALSE	FALSE	FALSE	nuc	1133000	1210000	1053000	936940	0	1097500	827780	912950	763720	1	1	1	1	0	1	1	1	2
239	Myotonin-protein kinase (Fragment) OS=Homo sapiens OX=9606 GN=DMPK PE=1 SV=1;Myotonin-protein kinase OS=Homo sapiens OX=9606 GN=DMPK PE=1 SV=1;Myotonin-protein kinase OS=Homo sapiens OX=9606 GN=DMPK PE=1 SV=3	M0QZ00	DMPK	14.483	-0.383	-0.505	0.62305	0.519108	1	0.567	FALSE	FALSE	FALSE	cyto	0	0	2980200	0	0	0	0	0	0	0	0	1	0	0	0	0	0	0
240	DnaJ homolog subfamily A member 1 OS=Homo sapiens OX=9606 GN=DNAJA1 PE=1 SV=2	P31689	DNAJA1	44.868	-2.92	-0.716	0.00867692	0.426482	1	0.529	FALSE	FALSE	FALSE	cyto	16229000	22077000	9408800	625550	3874900	661240	2062100	26738000	2121100	5	4	3	1	2	2	2	6	2
241	DnaJ homolog subfamily C member 8 (Fragment) OS=Homo sapiens OX=9606 GN=DNAJC8 PE=1 SV=1;DnaJ homolog subfamily C member 8 OS=Homo sapiens OX=9606 GN=DNAJC8 PE=1 SV=2	S4R3J5	DNAJC8	12.98	0.753	0.833	0.276445	0.232616	1	0.463	FALSE	FALSE	FALSE	nuc	0	0	0	0	0	0	616390	0	1099300	0	0	0	0	0	0	1	0	1
242	Dynamin-1-like protein OS=Homo sapiens OX=9606 GN=DNM1L PE=1 SV=1;Dynamin-1-like protein OS=Homo sapiens OX=9606 GN=DNM1L PE=1 SV=2;Dynamin-1-like protein OS=Homo sapiens OX=9606 GN=DNM1L PE=1 SV=1;Dynamin-1-like protein OS=Homo sapiens OX=9606 GN=DNM1L PE	G8JLD5	DNM1L	79.621	-0.074	-1.11	0.92773	0.197058	1	0.445	FALSE	FALSE	FALSE	cyto	0	1746900	2181700	0	0	0	0	0	0	0	1	2	0	0	0	0	0	0
19	DNA (cytosine-5)-methyltransferase 1 OS=Homo sapiens OX=9606 GN=DNMT1 PE=1 SV=2	P26358	DNMT1	183.16	0.699	3.41	0.341902	0.00105547	1	0.000498	FALSE	TRUE	TRUE	nuc	0	0	0	0	0	0	3778600	9765600	5264100	0	0	0	0	0	0	3	4	3
243	Dynein regulatory complex subunit 7 OS=Homo sapiens OX=9606 GN=DRC7 PE=1 SV=1;Dynein regulatory complex subunit 7 (Fragment) OS=Homo sapiens OX=9606 GN=DRC7 PE=1 SV=1;Dynein regulatory complex subunit 7 (Fragment) OS=Homo sapiens OX=9606 GN=DRC7 PE=1 SV=1;	H3BN79	DRC7	8.3614	2.26	-0.222	0.181539	0.889276	1	0.672	FALSE	FALSE	FALSE	other	0	0	0	0	0	46408000	0	0	0	0	0	0	0	0	1	0	0	0
244	Desmoglein-1 OS=Homo sapiens OX=9606 GN=DSG1 PE=1 SV=2	Q02413	DSG1	113.75	0.587	0.987	0.544211	0.318211	1	0.493	FALSE	FALSE	FALSE	other	0	0	0	0	0	0	0	0	3235800	0	0	0	0	0	0	0	0	2
245	Desmoplakin OS=Homo sapiens OX=9606 GN=DSP PE=1 SV=3	P15924	DSP	331.77	0.462	1.64	0.658229	0.140379	1	0.403	FALSE	FALSE	FALSE	other	0	0	0	0	0	0	0	0	7965500	0	0	0	0	0	0	0	0	4
246	Destrin OS=Homo sapiens OX=9606 GN=DSTN PE=1 SV=3;Destrin OS=Homo sapiens OX=9606 GN=DSTN PE=1 SV=1	P60981	DSTN	18.506	1.51	2.89	0.196216	0.0264577	1	0.136	FALSE	FALSE	FALSE	other	2067900	3824400	2577400	0	6604600	1581200	2036800	8759100	7105700	1	2	1	0	3	1	1	3	3
20	Deoxyuridine 5-triphosphate nucleotidohydrolase, mitochondrial OS=Homo sapiens OX=9606 GN=DUT PE=1 SV=1;Deoxyuridine 5-triphosphate nucleotidohydrolase, mitochondrial OS=Homo sapiens OX=9606 GN=DUT PE=1 SV=1;Deoxyuridine 5-triphosphate nucleotidohydrola	A0A0C4DGL3	DUT	15.395	0.689	4.98	0.403325	0.000185059	1	2.56e-06	FALSE	TRUE	TRUE	nuc	1855800	2676500	1411600	616580	805390	713970	10729000	15959000	13939000	1	1	1	1	1	1	2	2	3
247	Cytoplasmic dynein 1 heavy chain 1 OS=Homo sapiens OX=9606 GN=DYNC1H1 PE=1 SV=5;Cytoplasmic dynein 1 heavy chain 1 (Fragment) OS=Homo sapiens OX=9606 GN=DYNC1H1 PE=1 SV=1;Cytoplasmic dynein 1 heavy chain 1 (Fragment) OS=Homo sapiens OX=9606 GN=DYNC1H1 PE=1	Q14204	DYNC1H1	532.4	-0.418	-0.294	0.414802	0.562514	1	0.584	FALSE	FALSE	FALSE	cyto	0	0	1504300	0	0	1389400	0	0	0	0	0	1	0	0	1	0	0	0
21	Dynein light chain (Fragment) OS=Homo sapiens OX=9606 GN=DYNLL1 PE=1 SV=1;Dynein light chain OS=Homo sapiens OX=9606 GN=DYNLL1 PE=1 SV=1;Dynein light chain OS=Homo sapiens OX=9606 GN=DYNLL1 PE=1 SV=1;Dynein light chain 1, cytoplasmic OS=Homo sapiens OX=960	F8VXI7	DYNLL1	4.7714	0.456	4.34	0.506207	0.000140738	1	9.27e-07	FALSE	TRUE	TRUE	other	0	0	10300000	0	0	0	11760000	14696000	11703000	1	1	1	0	0	1	1	1	1
248	EBNA1 binding protein 2, isoform CRA_d OS=Homo sapiens OX=9606 GN=EBNA1BP2 PE=1 SV=1;Probable rRNA-processing protein EBP2 OS=Homo sapiens OX=9606 GN=EBNA1BP2 PE=1 SV=2	H7C2Q8	EBNA1BP2	40.684	0.488	2.43	0.761499	0.15576	1	0.417	FALSE	FALSE	FALSE	nuc	0	0	0	0	0	0	0	52236000	0	0	0	0	0	0	0	0	7	0
249	3-beta-hydroxysteroid-Delta(8),Delta(7)-isomerase OS=Homo sapiens OX=9606 GN=EBP PE=1 SV=3	Q15125	EBP	26.352	-0.0885	-0.347	0.927615	0.722782	1	0.633	FALSE	FALSE	FALSE	other	1624200	1710200	3148000	1069000	1282800	1712500	998410	1771200	1090300	1	1	1	1	1	1	1	1	1
250	Elongation factor 1-alpha 1 OS=Homo sapiens OX=9606 GN=EEF1A1 PE=1 SV=1;Putative elongation factor 1-alpha-like 3 OS=Homo sapiens OX=9606 GN=EEF1A1P5 PE=5 SV=1;Elongation factor 1-alpha 1 OS=Homo sapiens OX=9606 GN=EEF1A1 PE=1 SV=1;Elongation factor 1-alph	P68104	EEF1A1	50.14	0.0166	-0.152	0.967296	0.708512	1	0.629	FALSE	FALSE	FALSE	cyto	416140000	540910000	482870000	147740000	469080000	427250000	171920000	698240000	267940000	13	14	13	11	14	14	11	13	15
251	Elongation factor 1-gamma OS=Homo sapiens OX=9606 GN=EEF1G PE=1 SV=3	P26641	EEF1G	50.118	0.492	0.921	0.619228	0.361578	1	0.506	FALSE	FALSE	FALSE	cyto	0	4256600	5495500	0	0	2639500	0	2781300	3167800	1	1	1	0	0	1	0	1	1
252	Elongation factor 2 OS=Homo sapiens OX=9606 GN=EEF2 PE=1 SV=4	P13639	EEF2	95.337	-0.699	-0.0966	0.131671	0.82288	1	0.658	FALSE	FALSE	FALSE	cyto	303510000	533180000	303920000	67266000	184320000	174270000	206230000	441770000	265620000	25	26	24	14	22	23	23	26	25
253	116 kDa U5 small nuclear ribonucleoprotein component OS=Homo sapiens OX=9606 GN=EFTUD2 PE=1 SV=1;116 kDa U5 small nuclear ribonucleoprotein component (Fragment) OS=Homo sapiens OX=9606 GN=EFTUD2 PE=1 SV=1;116 kDa U5 small nuclear ribonucleoprotein componen	Q15029	EFTUD2	109.43	0.977	0.761	0.142381	0.240878	1	0.467	FALSE	FALSE	FALSE	nuc	0	0	0	0	0	0	1007800	873640	0	0	0	0	0	0	0	1	1	0
254	Receptor protein-tyrosine kinase OS=Homo sapiens OX=9606 GN=EGFR PE=1 SV=3;Epidermal growth factor receptor OS=Homo sapiens OX=9606 GN=EGFR PE=1 SV=2;Epidermal growth factor receptor OS=Homo sapiens OX=9606 GN=EGFR PE=1 SV=1;Receptor protein-tyrosine kinas	E9PFD7	EGFR	129.17	-1.38	-1.54	0.0324797	0.0203833	1	0.103	FALSE	FALSE	FALSE	other	7775700	2699500	3730800	0	0	0	0	205580	0	2	2	2	0	0	1	0	1	0
255	Eukaryotic translation initiation factor 1A, X-chromosomal OS=Homo sapiens OX=9606 GN=EIF1AX PE=1 SV=1;Eukaryotic translation initiation factor 1A, Y-chromosomal OS=Homo sapiens OX=9606 GN=EIF1AY PE=1 SV=1;Eukaryotic translation initiation factor 1A, X-chr	X6RAC9	EIF1AX	13.232	0.586	0.461	0.502031	0.596007	1	0.595	FALSE	FALSE	FALSE	cyto	0	0	0	0	0	0	0	1504000	0	0	0	0	0	0	0	0	1	0
256	Eukaryotic translation initiation factor 2 subunit 3B OS=Homo sapiens OX=9606 GN=EIF2S3B PE=2 SV=2;Eukaryotic translation initiation factor 2 subunit 3 OS=Homo sapiens OX=9606 GN=EIF2S3 PE=1 SV=3;Eukaryotic translation initiation factor 2 subunit 3 (Fragme	Q2VIR3	EIF2S3L	51.228	-0.497	-0.522	0.587698	0.569686	1	0.586	FALSE	FALSE	FALSE	other	0	3438300	4716000	0	0	0	0	3947500	0	0	1	2	0	0	0	0	1	0
257	Eukaryotic translation initiation factor 3 subunit A OS=Homo sapiens OX=9606 GN=EIF3A PE=1 SV=1	Q14152	EIF3A	166.57	-0.567	-0.813	0.584643	0.437904	1	0.532	FALSE	FALSE	FALSE	other	1543100	0	4179500	685800	0	1781700	0	0	0	1	0	2	1	0	1	0	0	0
258	Eukaryotic translation initiation factor 3 subunit C OS=Homo sapiens OX=9606 GN=EIF3C PE=1 SV=1;Eukaryotic translation initiation factor 3 subunit C-like protein OS=Homo sapiens OX=9606 GN=EIF3CL PE=3 SV=1	Q99613	EIF3C	105.34	-0.376	-0.452	0.696674	0.640262	1	0.609	FALSE	FALSE	FALSE	cyto	4970400	0	0	0	0	0	0	0	0	2	0	0	0	0	0	0	0	0
259	Eukaryotic initiation factor 4A-I OS=Homo sapiens OX=9606 GN=EIF4A1 PE=1 SV=1;Eukaryotic initiation factor 4A-I OS=Homo sapiens OX=9606 GN=EIF4A1 PE=1 SV=1;Eukaryotic initiation factor 4A-I (Fragment) OS=Homo sapiens OX=9606 GN=EIF4A1 PE=1 SV=1;Eukaryotic	P60842	EIF4A1	46.153	-0.148	-0.661	0.726308	0.143483	1	0.406	FALSE	FALSE	FALSE	cyto	44779000	62412000	59218000	14205000	31295000	26995000	8711200	43780000	12283000	6	9	8	4	6	4	2	5	4
22	Eukaryotic initiation factor 4A-III OS=Homo sapiens OX=9606 GN=EIF4A3 PE=1 SV=2;Eukaryotic initiation factor 4A-III OS=Homo sapiens OX=9606 GN=EIF4A3 PE=1 SV=4	I3L3H2	EIF4A3	44.511	0.72	5.08	0.33371	7.35235e-05	1	6.09e-08	FALSE	TRUE	TRUE	nuc	3110200	1205700	1383000	0	2268400	0	12361000	23070000	6315400	1	1	1	0	1	0	6	6	5
23	Eukaryotic translation initiation factor 4B OS=Homo sapiens OX=9606 GN=EIF4B PE=1 SV=1;Eukaryotic translation initiation factor 4B OS=Homo sapiens OX=9606 GN=EIF4B PE=1 SV=2;Eukaryotic translation initiation factor 4B (Fragment) OS=Homo sapiens OX=9606 GN=	E7EX17	EIF4B	69.697	-2.1	-4.93	0.0272299	0.000205063	1	3.66e-06	FALSE	TRUE	TRUE	cyto	15859000	27370000	22444000	2925600	5765900	6546500	0	0	1796900	6	8	5	2	3	2	0	0	1
260	Eukaryotic translation initiation factor 4 gamma 1 OS=Homo sapiens OX=9606 GN=EIF4G1 PE=1 SV=1;Eukaryotic translation initiation factor 4 gamma 1 OS=Homo sapiens OX=9606 GN=EIF4G1 PE=1 SV=1;Eukaryotic translation initiation factor 4 gamma 1 OS=Homo sapiens	E7EX73	EIF4G1	158.64	-0.925	-1.08	0.299596	0.232234	1	0.463	FALSE	FALSE	FALSE	cyto	2043700	4632800	3475400	0	0	2969800	0	0	0	1	4	3	0	1	1	0	0	0
261	Eukaryotic translation initiation factor 5A (Fragment) OS=Homo sapiens OX=9606 GN=EIF5A PE=1 SV=8;Eukaryotic translation initiation factor 5A-1 OS=Homo sapiens OX=9606 GN=EIF5A PE=1 SV=1;Eukaryotic translation initiation factor 5A-1 OS=Homo sapiens OX=9606	I3L397	EIF5A	16.019	0.182	4.21	0.914203	0.0317457	1	0.163	FALSE	FALSE	FALSE	cyto	0	17510000	0	0	8691600	0	17524000	80030000	25608000	0	3	0	0	2	1	3	7	3
262	Eukaryotic translation initiation factor 5B OS=Homo sapiens OX=9606 GN=EIF5B PE=1 SV=1;Eukaryotic translation initiation factor 5B OS=Homo sapiens OX=9606 GN=EIF5B PE=1 SV=4	A0A087WUT6	EIF5B	138.68	0.967	-0.257	0.24156	0.745945	1	0.639	FALSE	FALSE	FALSE	cyto	0	409000	0	0	0	0	0	0	0	0	1	0	0	0	0	0	0	0
263	ELAV-like protein 1 OS=Homo sapiens OX=9606 GN=ELAVL1 PE=1 SV=2	Q15717	ELAVL1	36.091	0.158	1.24	0.736666	0.0247358	1	0.127	FALSE	FALSE	FALSE	nuc	3788200	9278600	3291900	2237100	5730000	5679700	7306600	23447000	18902000	3	4	2	2	3	4	4	4	5
264	Emerin OS=Homo sapiens OX=9606 GN=EMD PE=1 SV=1;Emerin (Emery-Dreifuss muscular dystrophy), isoform CRA_b OS=Homo sapiens OX=9606 GN=EMD PE=1 SV=1	P50402	EMD	28.994	0.136	0.788	0.825172	0.221618	1	0.458	FALSE	FALSE	FALSE	nuc	14106000	32791000	41675000	5793100	41243000	30364000	17641000	90299000	88406000	4	7	7	4	7	6	5	8	9
265	Alpha-enolase OS=Homo sapiens OX=9606 GN=ENO1 PE=1 SV=2;Alpha-enolase OS=Homo sapiens OX=9606 GN=ENO1 PE=1 SV=1;Alpha-enolase (Fragment) OS=Homo sapiens OX=9606 GN=ENO1 PE=1 SV=1;Alpha-enolase (Fragment) OS=Homo sapiens OX=9606 GN=ENO1 PE=1 SV=1;Alpha-enol	P06733	ENO1	47.168	-0.305	1.21	0.886746	0.574754	1	0.588	FALSE	FALSE	FALSE	cyto	9788800	2498900	0	1706100	0	1792400	2523900	84693000	2109000	3	1	0	1	0	1	2	8	1
24	Bifunctional glutamate/proline--tRNA ligase OS=Homo sapiens OX=9606 GN=EPRS PE=1 SV=5;Bifunctional glutamate/proline--tRNA ligase (Fragment) OS=Homo sapiens OX=9606 GN=EPRS PE=1 SV=1	P07814	EPRS	170.59	-2.76	-2.8	0.000350419	0.000312264	1	1.58e-05	FALSE	TRUE	TRUE	other	3985000	4381800	7944800	1004300	1614600	4164600	1838700	1676000	4904600	2	2	4	1	1	2	1	1	2
266	Endoplasmic reticulum-Golgi intermediate compartment protein 1 (Fragment) OS=Homo sapiens OX=9606 GN=ERGIC1 PE=1 SV=1;Endoplasmic reticulum-Golgi intermediate compartment protein 1 OS=Homo sapiens OX=9606 GN=ERGIC1 PE=1 SV=1;Endoplasmic reticulum-Golgi int	F2Z3Q5	ERGIC1	11.652	1.1	0.762	0.115237	0.2576	1	0.474	FALSE	FALSE	FALSE	nuc	0	1898100	2309200	0	1159600	1967500	600810	0	1214400	0	1	1	1	1	1	1	0	1
25	Enhancer of rudimentary homolog OS=Homo sapiens OX=9606 GN=ERH PE=1 SV=1;Enhancer of rudimentary homolog OS=Homo sapiens OX=9606 GN=ERH PE=1 SV=1	G3V279	ERH	8.2033	2.1	6.36	0.0666428	0.00017852	1	2.24e-06	FALSE	TRUE	TRUE	nuc	2032100	0	0	3602900	1422200	0	24292000	40240000	25059000	1	0	0	2	1	0	2	2	2
267	Endoplasmic reticulum resident protein 44 OS=Homo sapiens OX=9606 GN=ERP44 PE=1 SV=1	Q9BS26	ERP44	46.971	0.343	-0.0892	0.809276	0.949846	1	0.684	FALSE	FALSE	FALSE	other	1929400	3045200	5474100	1242600	1779900	7425300	1506900	2418000	6364600	2	1	3	2	1	3	1	1	3
268	Extended synaptotagmin-1 OS=Homo sapiens OX=9606 GN=ESYT1 PE=1 SV=1	Q9BSJ8	ESYT1	122.85	-0.129	-0.969	0.904929	0.381175	1	0.514	FALSE	FALSE	FALSE	other	6760700	3092000	2856100	0	0	0	0	0	0	3	2	2	0	0	0	0	0	0
26	RNA-binding protein EWS OS=Homo sapiens OX=9606 GN=EWSR1 PE=1 SV=1;RNA-binding protein EWS OS=Homo sapiens OX=9606 GN=EWSR1 PE=1 SV=1;RNA-binding protein EWS OS=Homo sapiens OX=9606 GN=EWSR1 PE=1 SV=1;EWS RNA-binding protein variant 6 OS=Homo sapiens OX=96	B0QYK0	EWSR1	64.929	0.571	8.4	0.2701	8.02262e-08	1	1.11e-14	FALSE	TRUE	TRUE	nuc	0	0	0	0	1355000	0	138120000	207520000	187430000	0	0	0	0	1	0	5	5	5
269	Exonuclease 3-5 domain-containing protein 2 OS=Homo sapiens OX=9606 GN=EXD2 PE=1 SV=2	Q9NVH0	EXD2	70.352	-1.4	-1.52	0.185652	0.153701	1	0.415	FALSE	FALSE	FALSE	mito	3008300	2708300	6501300	0	0	0	0	0	0	3	3	3	0	0	0	0	0	0
270	Ezrin OS=Homo sapiens OX=9606 GN=EZR PE=1 SV=3;Ezrin OS=Homo sapiens OX=9606 GN=EZR PE=1 SV=4	E7EQR4	EZR	69.371	0.25	-0.0292	0.680022	0.961456	1	0.686	FALSE	FALSE	FALSE	other	1066600	1268700	0	0	0	0	0	1319200	753920	1	1	0	0	0	0	0	1	1
271	Acyl-CoA (8-3)-desaturase OS=Homo sapiens OX=9606 GN=FADS1 PE=1 SV=1;Acyl-CoA (8-3)-desaturase OS=Homo sapiens OX=9606 GN=FADS1 PE=1 SV=3;Acyl-CoA (8-3)-desaturase (Fragment) OS=Homo sapiens OX=9606 GN=FADS1 PE=1 SV=1	A0A0A0MR51	FADS1	57.885	0.196	-3.42	0.867704	0.0165903	1	0.0831	FALSE	FALSE	FALSE	other	10407000	16719000	15516000	0	15538000	19619000	3701800	4277900	3529000	2	5	3	0	4	6	1	2	1
272	Fatty acid desaturase 3 OS=Homo sapiens OX=9606 GN=FADS3 PE=1 SV=1;Fatty acid desaturase 3 OS=Homo sapiens OX=9606 GN=FADS3 PE=1 SV=1	E9PS00	FADS3	48.166	0.556	0.265	0.324243	0.630154	1	0.606	FALSE	FALSE	FALSE	nuc	0	0	0	0	530420	0	0	0	0	0	0	0	0	1	0	0	0	0
273	Constitutive coactivator of PPAR-gamma-like protein 1 OS=Homo sapiens OX=9606 GN=FAM120A PE=1 SV=2;Constitutive coactivator of PPAR-gamma-like protein 1 (Fragment) OS=Homo sapiens OX=9606 GN=FAM120A PE=1 SV=1	Q9NZB2	FAM120A	121.89	-0.303	-1.39	0.737367	0.150525	1	0.413	FALSE	FALSE	FALSE	cyto	0	3704800	0	0	0	0	0	971840	0	0	3	1	0	0	0	0	1	0
274	PSME3-interacting protein (Fragment) OS=Homo sapiens OX=9606 GN=FAM192A PE=1 SV=1;PSME3-interacting protein OS=Homo sapiens OX=9606 GN=FAM192A PE=1 SV=1;PSME3-interacting protein OS=Homo sapiens OX=9606 GN=FAM192A PE=1 SV=1	H3BNK9	FAM192A	16.087	0.451	0.802	0.56755	0.319392	1	0.493	FALSE	FALSE	FALSE	other	0	0	0	0	0	0	708600	0	1337600	0	0	0	0	0	0	1	0	1
275	Protein FAM98B OS=Homo sapiens OX=9606 GN=FAM98B PE=1 SV=1	Q52LJ0	FAM98B	37.19	0.0232	0.0906	0.977388	0.912043	1	0.677	FALSE	FALSE	FALSE	nuc	0	0	0	0	0	0	0	2134300	0	0	0	0	0	0	0	0	1	0
276	Fatty acid synthase OS=Homo sapiens OX=9606 GN=FASN PE=1 SV=1;Fatty acid synthase OS=Homo sapiens OX=9606 GN=FASN PE=1 SV=3	A0A0U1RQF0	FASN	273.2	-2.25	-2.83	0.0372743	0.0136756	1	0.0661	FALSE	FALSE	FALSE	cyto	17342000	39068000	48423000	1490900	3329900	21465000	2874900	3317100	3527500	9	14	14	1	3	7	2	3	2
277	40S ribosomal protein S30 OS=Homo sapiens OX=9606 GN=FAU PE=1 SV=1;40S ribosomal protein S30 OS=Homo sapiens OX=9606 GN=FAU PE=1 SV=1	E9PR30	FAU	10.905	1	1.5	0.346314	0.173251	1	0.43	FALSE	FALSE	FALSE	cyto	0	12735000	0	2848000	2100400	0	0	6520600	0	0	1	0	1	1	1	0	1	0
278	rRNA 2-O-methyltransferase fibrillarin (Fragment) OS=Homo sapiens OX=9606 GN=FBL PE=1 SV=1;rRNA 2-O-methyltransferase fibrillarin (Fragment) OS=Homo sapiens OX=9606 GN=FBL PE=1 SV=1;rRNA 2-O-methyltransferase fibrillarin (Fragment) OS=Homo sapiens OX=96	M0R2U2	FBL	16.164	0.0116	-0.0948	0.994223	0.95265	1	0.685	FALSE	FALSE	FALSE	nuc	2790200	8554000	0	0	9761200	0	1897300	17852000	0	1	2	0	0	3	0	1	3	0
279	F-box only protein 22 OS=Homo sapiens OX=9606 GN=FBXO22 PE=1 SV=1;F-box only protein 22 (Fragment) OS=Homo sapiens OX=9606 GN=FBXO22 PE=1 SV=1	Q8NEZ5	FBXO22	44.508	0.536	0.911	0.448435	0.21179	1	0.453	FALSE	FALSE	FALSE	other	0	0	0	0	0	0	1662500	2763700	1346000	0	0	0	0	0	0	1	1	2
280	Four and a half LIM domains protein 1 (Fragment) OS=Homo sapiens OX=9606 GN=FHL1 PE=1 SV=1;Four and a half LIM domains protein 1 (Fragment) OS=Homo sapiens OX=9606 GN=FHL1 PE=1 SV=1;Four and a half LIM domains protein 1 (Fragment) OS=Homo sapiens OX=9606 G	A0A0D9SFZ9	FHL1	19.897	1.93	2.99	0.204018	0.0645973	1	0.282	FALSE	FALSE	FALSE	cyto	4628100	0	4215900	0	0	6472600	9840500	5865700	6626500	1	1	1	0	0	1	1	1	1
281	Four and a half LIM domains protein 2 OS=Homo sapiens OX=9606 GN=FHL2 PE=1 SV=1;Four and a half LIM domains protein 2 OS=Homo sapiens OX=9606 GN=FHL2 PE=1 SV=1;Four and a half LIM domains protein 2 OS=Homo sapiens OX=9606 GN=FHL2 PE=1 SV=3	J3KNW4	FHL2	44.205	0.172	0.269	0.683112	0.526164	1	0.57	FALSE	FALSE	FALSE	other	34676000	42146000	46974000	18140000	41876000	39201000	48496000	71108000	52116000	5	6	6	5	7	7	7	9	7
282	Four and a half LIM domains protein 3 OS=Homo sapiens OX=9606 GN=FHL3 PE=1 SV=4	Q13643	FHL3	31.192	0.744	0.719	0.410208	0.425575	1	0.528	FALSE	FALSE	FALSE	nuc	0	2731200	2050800	0	2911000	2304800	0	2974900	0	0	1	1	0	1	1	0	2	0
283	Uncharacterized protein OS=Homo sapiens OX=9606 PE=3 SV=1;Pre-mRNA 3-end-processing factor FIP1 OS=Homo sapiens OX=9606 GN=FIP1L1 PE=1 SV=1	A0A0B4J203	FIP1L1	94.702	0.774	1.1	0.487429	0.332283	1	0.497	FALSE	FALSE	FALSE	nuc	2323100	0	0	0	0	0	3558200	0	0	1	0	0	0	0	0	1	0	0
284	Peptidyl-prolyl cis-trans isomerase FKBP4 OS=Homo sapiens OX=9606 GN=FKBP4 PE=1 SV=3	Q02790	FKBP4	51.804	0.359	0.131	0.636715	0.861933	1	0.666	FALSE	FALSE	FALSE	cyto	516130	1139300	1238800	0	1910800	267840	0	588710	0	1	1	2	0	2	1	0	1	0
27	Peptidyl-prolyl cis-trans isomerase FKBP8 OS=Homo sapiens OX=9606 GN=FKBP8 PE=1 SV=2;Peptidyl-prolyl cis-trans isomerase FKBP8 (Fragment) OS=Homo sapiens OX=9606 GN=FKBP8 PE=1 SV=1;Peptidyl-prolyl cis-trans isomerase FKBP8 OS=Homo sapiens OX=9606 GN=FKBP8	Q14318	FKBP8	44.561	-4.83	-5.52	1.87602e-05	6.74655e-06	1	1.11e-14	FALSE	TRUE	TRUE	mito	32161000	18835000	32273000	0	0	29554000	0	0	0	3	3	4	0	0	3	0	0	0
285	Filamin-A OS=Homo sapiens OX=9606 GN=FLNA PE=1 SV=4;Filamin-A OS=Homo sapiens OX=9606 GN=FLNA PE=1 SV=1;Filamin-A OS=Homo sapiens OX=9606 GN=FLNA PE=1 SV=1	P21333	FLNA	280.74	-0.187	-0.526	0.659086	0.233263	1	0.464	FALSE	FALSE	FALSE	cyto	81379000	126490000	122800000	31912000	53707000	82036000	33433000	54474000	42490000	25	27	29	18	22	25	17	18	19
286	Filamin-B OS=Homo sapiens OX=9606 GN=FLNB PE=1 SV=2;Filamin-B OS=Homo sapiens OX=9606 GN=FLNB PE=1 SV=1	O75369	FLNB	278.16	0.701	0.0475	0.384514	0.9518	1	0.685	FALSE	FALSE	FALSE	other	479460	915080	0	0	0	509980	0	427210	0	1	1	0	0	0	1	0	1	0
287	FLYWCH family member 2 OS=Homo sapiens OX=9606 GN=FLYWCH2 PE=1 SV=1;FLYWCH family member 2 OS=Homo sapiens OX=9606 GN=FLYWCH2 PE=1 SV=1;FLYWCH family member 2 (Fragment) OS=Homo sapiens OX=9606 GN=FLYWCH2 PE=1 SV=1	I3L1Y9	FLYWCH2	15.604	1.1	2.77	0.396682	0.0531716	1	0.248	FALSE	FALSE	FALSE	nuc	0	0	0	0	0	0	5277200	6161200	3030000	0	0	0	0	0	0	2	2	1
288	Formin-2 OS=Homo sapiens OX=9606 GN=FMN2 PE=1 SV=4	Q9NZ56	FMN2	180.1	0.793	2.35	0.573194	0.119263	1	0.38	FALSE	FALSE	FALSE	other	0	18481000	22675000	0	13553000	21117000	11848000	14771000	18024000	0	1	1	0	1	1	1	1	1
289	Protein FRG1 OS=Homo sapiens OX=9606 GN=FRG1 PE=1 SV=1;Protein FRG1 (Fragment) OS=Homo sapiens OX=9606 GN=FRG1 PE=1 SV=8;Protein FRG1 (Fragment) OS=Homo sapiens OX=9606 GN=FRG1 PE=1 SV=1	Q14331	FRG1	29.172	0.73	0.957	0.500998	0.382432	1	0.514	FALSE	FALSE	FALSE	other	0	0	0	0	0	0	1751100	4448800	3242500	0	0	0	0	0	0	1	3	1
290	pre-rRNA processing protein FTSJ3 OS=Homo sapiens OX=9606 GN=FTSJ3 PE=1 SV=2	Q8IY81	FTSJ3	96.557	0.891	1.47	0.369809	0.154961	1	0.416	FALSE	FALSE	FALSE	nuc	2340000	2522900	1763700	1809200	2089400	1558000	0	4410400	4237700	1	1	1	1	1	1	1	1	1
28	Far upstream element-binding protein 1 OS=Homo sapiens OX=9606 GN=FUBP1 PE=1 SV=1;Far upstream element-binding protein 1 OS=Homo sapiens OX=9606 GN=FUBP1 PE=1 SV=3	E9PEB5	FUBP1	68.903	1.51	7.69	0.119838	1.65481e-05	1	1.16e-11	FALSE	TRUE	TRUE	nuc	0	0	0	0	4200500	0	69989000	131260000	123250000	0	0	0	0	1	0	5	6	6
291	Far upstream element-binding protein 3 OS=Homo sapiens OX=9606 GN=FUBP3 PE=1 SV=2	Q96I24	FUBP3	61.64	0.399	1.69	0.72135	0.155392	1	0.417	FALSE	FALSE	FALSE	nuc	1329300	1984400	1182600	0	0	0	1548900	9464500	0	1	1	2	0	0	0	1	2	0
29	RNA-binding protein FUS OS=Homo sapiens OX=9606 GN=FUS PE=1 SV=1;RNA-binding protein FUS OS=Homo sapiens OX=9606 GN=FUS PE=1 SV=1	P35637	FUS	53.425	2.17	5.46	0.0897964	0.00115647	1	0.000615	FALSE	TRUE	TRUE	nuc	4574100	21241000	12119000	13866000	39540000	17253000	248220000	626000000	407610000	1	2	1	2	3	2	4	6	4
292	Ras GTPase-activating protein-binding protein 2 OS=Homo sapiens OX=9606 GN=G3BP2 PE=1 SV=2	Q9UN86	G3BP2	54.12	0.439	0.483	0.469477	0.427616	1	0.529	FALSE	FALSE	FALSE	cyto	713990	0	0	0	0	0	0	0	0	2	0	0	0	0	0	0	0	0
293	Glucose-6-phosphate 1-dehydrogenase (Fragment) OS=Homo sapiens OX=9606 GN=G6PD PE=1 SV=8;Glucose-6-phosphate 1-dehydrogenase OS=Homo sapiens OX=9606 GN=G6PD PE=1 SV=4;Glucose-6-phosphate 1-dehydrogenase (Fragment) OS=Homo sapiens OX=9606 GN=G6PD PE=1 SV=1;	E7EUI8	G6PD	38.45	-0.13	-1.01	0.873707	0.236639	1	0.465	FALSE	FALSE	FALSE	cyto	0	5244400	2454200	0	0	0	0	2748200	0	0	1	1	1	0	0	0	1	0
294	Neutral alpha-glucosidase AB OS=Homo sapiens OX=9606 GN=GANAB PE=1 SV=3;Neutral alpha-glucosidase AB OS=Homo sapiens OX=9606 GN=GANAB PE=1 SV=1;Neutral alpha-glucosidase AB OS=Homo sapiens OX=9606 GN=GANAB PE=1 SV=1	Q14697	GANAB	106.87	0.662	-1.02	0.499242	0.305514	1	0.489	FALSE	FALSE	FALSE	other	1325700	799990	3416300	0	730010	3483700	0	2393200	0	1	1	2	0	1	3	0	1	0
295	Glyceraldehyde-3-phosphate dehydrogenase OS=Homo sapiens OX=9606 GN=GAPDH PE=1 SV=3;Glyceraldehyde-3-phosphate dehydrogenase OS=Homo sapiens OX=9606 GN=GAPDH PE=1 SV=1	P04406	GAPDH	36.053	0.0916	0.0162	0.820354	0.967827	1	0.688	FALSE	FALSE	FALSE	cyto	69925000	130910000	240300000	38490000	52642000	133960000	33081000	172200000	40876000	5	6	8	4	4	6	4	7	4
296	Transcriptional repressor p66-beta (Fragment) OS=Homo sapiens OX=9606 GN=GATAD2B PE=1 SV=1;Transcriptional repressor p66-beta OS=Homo sapiens OX=9606 GN=GATAD2B PE=1 SV=1;Transcriptional repressor p66-beta OS=Homo sapiens OX=9606 GN=GATAD2B PE=1 SV=1;Trans	A0A0U1RR30	GATAD2B	28.673	-0.106	0.37	0.900318	0.662994	1	0.616	FALSE	FALSE	FALSE	nuc	0	0	0	0	0	0	1300300	0	1416500	0	0	0	0	0	0	1	1	1
297	1,4-alpha-glucan-branching enzyme OS=Homo sapiens OX=9606 GN=GBE1 PE=1 SV=1;1,4-alpha-glucan-branching enzyme OS=Homo sapiens OX=9606 GN=GBE1 PE=1 SV=3	E9PGM4	GBE1	75.959	-0.0777	-0.162	0.910275	0.814047	1	0.656	FALSE	FALSE	FALSE	cyto	0	969370	0	0	0	0	0	0	0	0	1	0	0	0	0	0	0	0
298	Glutamate--cysteine ligase regulatory subunit OS=Homo sapiens OX=9606 GN=GCLM PE=1 SV=1	P48507	GCLM	30.727	1.34	0.944	0.122741	0.259566	1	0.474	FALSE	FALSE	FALSE	other	0	0	0	0	0	0	0	1351900	0	0	0	0	0	0	0	1	1	0
299	Gem-associated protein 5 OS=Homo sapiens OX=9606 GN=GEMIN5 PE=1 SV=3	Q8TEQ6	GEMIN5	168.59	-1.16	-1.67	0.0480971	0.00983389	1	0.0426	FALSE	FALSE	FALSE	cyto	1709700	2564100	1409600	0	0	0	0	0	0	1	2	2	0	0	0	0	0	0
300	Glutamine--fructose-6-phosphate aminotransferase [isomerizing] 1 OS=Homo sapiens OX=9606 GN=GFPT1 PE=1 SV=3	Q06210	GFPT1	78.806	-0.282	-0.654	0.714044	0.403297	1	0.521	FALSE	FALSE	FALSE	nuc	0	1110100	0	0	0	0	0	0	0	1	1	0	0	0	0	0	0	0
301	GMP synthase [glutamine-hydrolyzing] OS=Homo sapiens OX=9606 GN=GMPS PE=1 SV=1	P49915	GMPS	76.715	0.679	1.6	0.53679	0.1668	1	0.426	FALSE	FALSE	FALSE	cyto	0	0	0	0	0	0	2238200	11089000	5987400	0	0	0	0	0	0	1	2	3
302	Guanine nucleotide-binding protein G(o) subunit alpha OS=Homo sapiens OX=9606 GN=GNAO1 PE=1 SV=1;Guanine nucleotide-binding protein G(s) subunit alpha isoforms short (Fragment) OS=Homo sapiens OX=9606 GN=GNAS PE=1 SV=1;Guanine nucleotide-binding protein G(	A0A1W2PRE1	GNAS	5.7186	0.844	0.878	0.315655	0.29737	1	0.487	FALSE	FALSE	FALSE	nuc	2071300	2021900	2306600	0	1698200	0	0	1786900	912330	1	1	1	0	1	0	0	1	1
303	Receptor of-activated protein C kinase 1 (Fragment) OS=Homo sapiens OX=9606 GN=RACK1 PE=1 SV=1;Receptor of-activated protein C kinase 1 OS=Homo sapiens OX=9606 GN=RACK1 PE=1 SV=1;Receptor of activated protein C kinase 1 OS=Homo sapiens OX=9606 GN=RACK1 PE=	H0YAF8	GNB2L1	21.934	1.51	1.68	0.0903578	0.064541	1	0.282	FALSE	FALSE	FALSE	other	3003500	1894300	0	0	1519500	1563100	2283200	0	0	2	2	0	0	2	1	1	0	0
304	Guanine nucleotide-binding protein-like 3 OS=Homo sapiens OX=9606 GN=GNL3 PE=1 SV=2	Q9BVP2	GNL3	61.992	1.63	2.8	0.206588	0.0455499	1	0.222	FALSE	FALSE	FALSE	nuc	0	0	8420800	0	5217400	8084000	5494100	23984000	7514600	0	1	2	0	2	2	2	4	2
305	Golgi-associated PDZ and coiled-coil motif containing protein transcript variant 3 OS=Homo sapiens OX=9606 GN=GOPC PE=1 SV=2;Golgi-associated PDZ and coiled-coil motif-containing protein OS=Homo sapiens OX=9606 GN=GOPC PE=1 SV=1	F5H1Y4	GOPC	44.79	-0.228	-0.917	0.770459	0.258983	1	0.474	FALSE	FALSE	FALSE	other	939830	2743300	0	0	0	0	0	0	0	1	2	1	0	0	0	0	0	0
306	Glycerol-3-phosphate dehydrogenase, mitochondrial OS=Homo sapiens OX=9606 GN=GPD2 PE=1 SV=3;Glycerol-3-phosphate dehydrogenase OS=Homo sapiens OX=9606 GN=GPD2 PE=1 SV=1	P43304	GPD2	80.852	-0.69	-1.4	0.495266	0.184971	1	0.438	FALSE	FALSE	FALSE	mito	0	5508000	0	0	0	0	0	0	0	0	1	1	0	0	0	0	0	0
307	Eukaryotic peptide chain release factor GTP-binding subunit ERF3A (Fragment) OS=Homo sapiens OX=9606 GN=GSPT1 PE=1 SV=1;Eukaryotic peptide chain release factor GTP-binding subunit ERF3A OS=Homo sapiens OX=9606 GN=GSPT1 PE=1 SV=1	H3BR35	GSPT1	52.832	0.354	-0.499	0.748404	0.652003	1	0.613	FALSE	FALSE	FALSE	cyto	5395500	5939500	3048900	0	0	0	0	0	0	2	2	1	0	0	0	0	0	0
308	Glutathione S-transferase OS=Homo sapiens OX=9606 GN=GSTM3 PE=1 SV=1;Glutathione S-transferase Mu 3 OS=Homo sapiens OX=9606 GN=GSTM3 PE=1 SV=3;Glutathione S-transferase Mu 2 (Fragment) OS=Homo sapiens OX=9606 GN=GSTM2 PE=1 SV=2;Glutathione S-transferase Mu	A0A0A0MTN3	GSTM3	24.914	0.165	0.839	0.834281	0.303174	1	0.488	FALSE	FALSE	FALSE	cyto	663770	1073200	713240	0	647700	409510	460260	1247800	670370	1	1	1	0	1	1	1	2	1
309	Glutathione S-transferase P OS=Homo sapiens OX=9606 GN=GSTP1 PE=1 SV=2;Glutathione S-transferase P (Fragment) OS=Homo sapiens OX=9606 GN=GSTP1 PE=1 SV=1;Glutathione S-transferase P OS=Homo sapiens OX=9606 GN=GSTP1 PE=1 SV=1	P09211	GSTP1	23.356	2.29	3.41	0.193485	0.0664744	1	0.287	FALSE	FALSE	FALSE	other	2555800	9751400	3457800	0	10198000	2344500	0	23802000	11947000	1	1	1	0	2	1	0	3	2
30	General transcription factor II-I OS=Homo sapiens OX=9606 GN=GTF2I PE=1 SV=2	P78347	GTF2I	112.42	0.774	4.33	0.324289	0.000329039	1	1.86e-05	FALSE	TRUE	TRUE	nuc	0	0	0	0	0	0	14974000	5291300	10491000	0	0	0	0	0	0	6	2	4
310	Nucleolar GTP-binding protein 1 (Fragment) OS=Homo sapiens OX=9606 GN=GTPBP4 PE=1 SV=1;Nucleolar GTP-binding protein 1 OS=Homo sapiens OX=9606 GN=GTPBP4 PE=1 SV=3	Q5T3R7	GTPBP4	16.48	0.588	0.372	0.466101	0.641322	1	0.61	FALSE	FALSE	FALSE	nuc	0	0	0	0	354340	207480	286990	745100	0	0	0	0	0	1	1	1	1	0
311	Histone H1x OS=Homo sapiens OX=9606 GN=H1FX PE=1 SV=1	Q92522	H1FX	22.487	0.227	0.223	0.81251	0.815518	1	0.656	FALSE	FALSE	FALSE	other	0	0	0	0	0	0	0	1556500	0	0	0	0	0	0	0	0	1	0
312	Core histone macro-H2A.1 OS=Homo sapiens OX=9606 GN=H2AFY PE=1 SV=4;Histone H2A OS=Homo sapiens OX=9606 GN=H2AFY PE=1 SV=1	O75367	H2AFY	39.617	0.455	0.881	0.573172	0.287978	1	0.484	FALSE	FALSE	FALSE	other	0	0	0	0	0	0	0	1880700	0	0	0	0	0	0	0	0	3	0
313	Very-long-chain (3R)-3-hydroxyacyl-CoA dehydratase (Fragment) OS=Homo sapiens OX=9606 GN=HACD3 PE=1 SV=1;Very-long-chain (3R)-3-hydroxyacyl-CoA dehydratase OS=Homo sapiens OX=9606 GN=HACD3 PE=1 SV=1;Very-long-chain (3R)-3-hydroxyacyl-CoA dehydratase OS=Hom	H3BMZ1	HACD3	16.164	0.814	1.12	0.28289	0.152705	1	0.415	FALSE	FALSE	FALSE	other	1538900	0	2302400	1512400	1361300	2168200	1619100	1671500	1765700	1	0	1	1	1	1	1	1	1
314	Cytochrome c-type heme lyase OS=Homo sapiens OX=9606 GN=HCCS PE=1 SV=1	P53701	HCCS	30.601	-0.793	-1.16	0.109442	0.0292264	1	0.15	FALSE	FALSE	FALSE	mito	49592000	60949000	58870000	18866000	17368000	23836000	12879000	11383000	16839000	6	8	6	6	5	5	4	3	5
315	Host cell factor 1 OS=Homo sapiens OX=9606 GN=HCFC1 PE=1 SV=2;Host cell factor 1 OS=Homo sapiens OX=9606 GN=HCFC1 PE=1 SV=2	A6NEM2	HCFC1	213.47	0.652	0.875	0.361736	0.230206	1	0.462	FALSE	FALSE	FALSE	nuc	0	0	0	0	0	0	1102800	876650	449740	0	0	0	0	0	0	1	1	1
316	Histone deacetylase 2 (Fragment) OS=Homo sapiens OX=9606 GN=HDAC2 PE=1 SV=1;Histone deacetylase 2 (Fragment) OS=Homo sapiens OX=9606 GN=HDAC2 PE=1 SV=1;Histone deacetylase 2 (Fragment) OS=Homo sapiens OX=9606 GN=HDAC2 PE=1 SV=1;Histone deacetylase 2 (Fragm	E5RFI6	HDAC2	7.4336	0.0987	1.28	0.897985	0.124545	1	0.387	FALSE	FALSE	FALSE	nuc	2249900	1554200	0	1255300	0	1429300	4118100	3394000	2427300	2	1	0	1	1	1	1	1	1
31	Hepatoma-derived growth factor OS=Homo sapiens OX=9606 GN=HDGF PE=1 SV=1	P51858	HDGF	26.788	0.292	5.92	0.618406	4.48134e-06	1	1.11e-14	FALSE	TRUE	TRUE	nuc	0	4992300	0	0	0	0	17327000	43740000	41726000	0	1	0	0	0	0	3	5	6
317	High density lipoprotein binding protein (Vigilin), isoform CRA_a OS=Homo sapiens OX=9606 GN=HDLBP PE=1 SV=1;Vigilin OS=Homo sapiens OX=9606 GN=HDLBP PE=1 SV=2;Vigilin (Fragment) OS=Homo sapiens OX=9606 GN=HDLBP PE=1 SV=1	A0A024R4E5	HDLBP	141.44	-0.0971	-0.436	0.920082	0.654165	1	0.614	FALSE	FALSE	FALSE	cyto	1076500	1930600	4600400	0	0	0	0	0	0	1	2	2	0	0	0	0	0	0
318	Protein HEXIM1 OS=Homo sapiens OX=9606 GN=HEXIM1 PE=1 SV=1	O94992	HEXIM1	40.623	0.178	2.65	0.863949	0.0292036	1	0.15	FALSE	FALSE	FALSE	nuc	0	0	0	0	0	0	6138200	7116900	3516400	0	0	0	0	0	0	2	2	1
319	Hepatocyte growth factor-regulated tyrosine kinase substrate (Fragment) OS=Homo sapiens OX=9606 GN=HGS PE=1 SV=1;Hepatocyte growth factor-regulated tyrosine kinase substrate (Fragment) OS=Homo sapiens OX=9606 GN=HGS PE=1 SV=1;Hepatocyte growth factor-regul	I3L2H4	HGS	6.985	0.458	0.273	0.561067	0.726879	1	0.634	FALSE	FALSE	FALSE	other	901420	1614500	1209000	230170	443460	502000	0	0	0	1	1	1	1	1	1	0	0	0
320	Histone H1.5 OS=Homo sapiens OX=9606 GN=HIST1H1B PE=1 SV=3	P16401	HIST1H1B	22.58	0.495	2.23	0.684428	0.0923516	1	0.341	FALSE	FALSE	FALSE	other	0	0	0	0	8649800	0	0	21463000	0	0	0	0	0	1	0	0	2	0
321	Histone H1.2 OS=Homo sapiens OX=9606 GN=HIST1H1C PE=1 SV=2	P16403	HIST1H1C	21.364	-1.4	-1.64	0.568425	0.506188	1	0.562	FALSE	FALSE	FALSE	other	10353000	9462900	9302100	6645500	63022000	3225600	4141300	166700000	1745500	1	1	1	1	1	0	0	2	0
322	Histone H1.4 OS=Homo sapiens OX=9606 GN=HIST1H1E PE=1 SV=2;Histone H1.3 OS=Homo sapiens OX=9606 GN=HIST1H1D PE=1 SV=2	P10412	HIST1H1E	21.865	0.743	1.24	0.465747	0.237219	1	0.465	FALSE	FALSE	FALSE	other	0	0	0	0	0	0	0	7143600	0	0	0	0	0	0	0	0	1	0
323	Histone H2A OS=Homo sapiens OX=9606 GN=hCG_2039566 PE=3 SV=1;Histone H2A OS=Homo sapiens OX=9606 PE=3 SV=1;Histone H2A type 1-J OS=Homo sapiens OX=9606 GN=HIST1H2AJ PE=1 SV=3;Histone H2A type 1-H OS=Homo sapiens OX=9606 GN=HIST1H2AH PE=1 SV=3;Histone H2A.J	A0A0U1RR32	HIST1H2AJ	18.481	1.01	3.46	0.667603	0.165262	1	0.425	FALSE	FALSE	FALSE	other	0	0	0	0	15765000	0	0	442600000	0	0	0	0	0	1	0	0	1	0
324	Histone H2B OS=Homo sapiens OX=9606 GN=HIST1H2BN PE=1 SV=1;Histone H2B type 1-L OS=Homo sapiens OX=9606 GN=HIST1H2BL PE=1 SV=3;Histone H2B type 1-M OS=Homo sapiens OX=9606 GN=HIST1H2BM PE=1 SV=3;Histone H2B type 1-N OS=Homo sapiens OX=9606 GN=HIST1H2BN PE=	U3KQK0	HIST1H2BN	18.804	0.83	2.54	0.743556	0.329113	1	0.496	FALSE	FALSE	FALSE	other	3988600	50119000	121530000	2913400	162160000	78438000	7025100	722960000	86700000	0	0	0	0	0	0	0	2	0
325	Histone H4 OS=Homo sapiens OX=9606 GN=HIST1H4A PE=1 SV=2	P62805	HIST1H4A	11.367	0.327	1.17	0.818623	0.419346	1	0.526	FALSE	FALSE	FALSE	other	13178000	67247000	130490000	5588200	209190000	112300000	15210000	814170000	84709000	2	3	3	2	4	4	2	5	3
326	Histone H2A type 2-B OS=Homo sapiens OX=9606 GN=HIST2H2AB PE=1 SV=3;Histone H2A type 1-A OS=Homo sapiens OX=9606 GN=HIST1H2AA PE=1 SV=3;Histone H2AX OS=Homo sapiens OX=9606 GN=H2AFX PE=1 SV=2	Q8IUE6	HIST2H2AB	13.995	1.01	2.95	0.611686	0.158909	1	0.42	FALSE	FALSE	FALSE	other	0	0	0	0	52386000	0	0	186760000	0	0	0	0	0	0	0	0	1	0
327	Histone H3 OS=Homo sapiens OX=9606 GN=HIST2H3PS2 PE=1 SV=1	Q5TEC6	HIST2H3PS2	15.43	1.01	2.06	0.487158	0.17565	1	0.432	FALSE	FALSE	FALSE	other	0	0	0	0	10967000	0	0	29059000	0	0	0	0	0	1	0	0	1	0
328	Histone H2B type 3-B OS=Homo sapiens OX=9606 GN=HIST3H2BB PE=1 SV=3;Histone H2B type 2-E OS=Homo sapiens OX=9606 GN=HIST2H2BE PE=1 SV=3;Histone H2B type 1-B OS=Homo sapiens OX=9606 GN=HIST1H2BB PE=1 SV=2;Histone H2B type 1-O OS=Homo sapiens OX=9606 GN=HIST	Q8N257	HIST3H2BB	13.908	0.464	1.62	0.660519	0.147972	1	0.41	FALSE	FALSE	FALSE	other	0	0	0	0	4031700	0	0	10864000	0	0	0	0	0	1	0	0	1	0
329	Hexokinase-1 OS=Homo sapiens OX=9606 GN=HK1 PE=1 SV=3;Phosphotransferase (Fragment) OS=Homo sapiens OX=9606 GN=HK1 PE=1 SV=8	P19367	HK1	102.48	-0.569	-0.276	0.366011	0.655057	1	0.614	FALSE	FALSE	FALSE	mito	0	0	1640900	0	0	0	0	0	0	1	1	1	0	0	0	0	0	0
330	Hexokinase-2 OS=Homo sapiens OX=9606 GN=HK2 PE=1 SV=1;Hexokinase-2 OS=Homo sapiens OX=9606 GN=HK2 PE=1 SV=2	E9PB90	HK2	98.972	0.0847	-0.0304	0.945329	0.980359	1	0.69	FALSE	FALSE	FALSE	other	5571200	5015400	1259100	0	0	0	0	0	0	3	2	1	0	0	0	0	0	0
32	HLA class I histocompatibility antigen, B-35 alpha chain OS=Homo sapiens OX=9606 GN=HLA-B PE=1 SV=1;HLA class I histocompatibility antigen, B-78 alpha chain OS=Homo sapiens OX=9606 GN=HLA-B PE=1 SV=1;HLA class I histocompatibility antigen, B-53 alpha chain	P30685	HLA-B	40.455	-2.02	-3.05	0.0205454	0.00239845	1	0.00341	FALSE	TRUE	TRUE	other	3231500	2739400	8975600	189840	0	3479600	0	0	1603100	0	0	0	0	0	0	0	0	0
331	High mobility group protein HMG-I/HMG-Y OS=Homo sapiens OX=9606 GN=HMGA1 PE=1 SV=3	P17096	HMGA1	11.676	1.08	1.53	0.246098	0.115687	1	0.376	FALSE	FALSE	FALSE	nuc	0	0	0	0	0	0	0	7535600	0	0	0	0	0	0	0	0	1	0
33	High mobility group protein B1 OS=Homo sapiens OX=9606 GN=HMGB1 PE=1 SV=1;High mobility group protein B1 OS=Homo sapiens OX=9606 GN=HMGB1 PE=1 SV=3;Putative high mobility group protein B1-like 1 OS=Homo sapiens OX=9606 GN=HMGB1P1 PE=5 SV=1	Q5T7C4	HMGB1	18.311	0.493	3.44	0.631195	0.00785264	1	0.0305	FALSE	TRUE	TRUE	nuc	0	0	0	0	0	0	1866700	17386000	9899600	0	0	0	0	0	0	1	3	2
332	High mobility group nucleosome-binding domain-containing protein 3 OS=Homo sapiens OX=9606 GN=HMGN3 PE=1 SV=1;Non-histone chromosomal protein HMG-17 OS=Homo sapiens OX=9606 GN=HMGN2 PE=1 SV=3;High mobility group nucleosome-binding domain-containing protein	A0A087WZE9	HMGN3	13.956	0.72	1.58	0.488023	0.14779	1	0.41	FALSE	FALSE	FALSE	nuc	0	1100500	0	1268900	0	0	0	8370500	0	0	1	0	1	0	0	0	1	0
333	Heme oxygenase 2 OS=Homo sapiens OX=9606 GN=HMOX2 PE=1 SV=2;Heme oxygenase 2 (Fragment) OS=Homo sapiens OX=9606 GN=HMOX2 PE=1 SV=1;Heme oxygenase 2 (Fragment) OS=Homo sapiens OX=9606 GN=HMOX2 PE=1 SV=1;Heme oxygenase 2 (Fragment) OS=Homo sapiens OX=9606 GN	P30519	HMOX2	36.032	-1.65	-1.98	0.210878	0.141578	1	0.404	FALSE	FALSE	FALSE	cyto	6454300	7386800	2091500	1874500	1688300	1288700	0	0	0	2	2	1	1	1	1	1	0	0
334	Heterogeneous nuclear ribonucleoprotein A0 OS=Homo sapiens OX=9606 GN=HNRNPA0 PE=1 SV=1	Q13151	HNRNPA0	30.84	2.55	5.26	0.204344	0.0209352	1	0.106	FALSE	FALSE	FALSE	nuc	0	2520800	0	0	4131500	0	1393100	124520000	42257000	0	1	0	0	2	0	1	6	5
335	Heterogeneous nuclear ribonucleoprotein A1 OS=Homo sapiens OX=9606 GN=HNRNPA1 PE=1 SV=2;Heterogeneous nuclear ribonucleoprotein A1 OS=Homo sapiens OX=9606 GN=HNRNPA1 PE=1 SV=5;Heterogeneous nuclear ribonucleoprotein A1 (Fragment) OS=Homo sapiens OX=9606 GN	F8W6I7	HNRNPA1	33.155	0.571	2.7	0.513723	0.011553	1	0.0532	FALSE	FALSE	FALSE	nuc	9006100	66414000	23669000	8328500	69591000	31177000	43743000	550050000	260290000	4	7	6	3	8	8	7	11	9
336	Heterogeneous nuclear ribonucleoproteins A2/B1 OS=Homo sapiens OX=9606 GN=HNRNPA2B1 PE=1 SV=2;Heterogeneous nuclear ribonucleoproteins A2/B1 OS=Homo sapiens OX=9606 GN=HNRNPA2B1 PE=1 SV=1	P22626	HNRNPA2B1	37.429	0.0607	3.94	0.963345	0.0146432	1	0.0719	FALSE	FALSE	FALSE	nuc	1075700	20478000	6092000	1513500	24290000	4496400	28053000	257950000	108930000	1	5	3	1	5	2	6	9	8
337	Heterogeneous nuclear ribonucleoprotein A3 OS=Homo sapiens OX=9606 GN=HNRNPA3 PE=1 SV=2	P51991	HNRNPA3	39.594	0.439	4.34	0.782704	0.0219029	1	0.111	FALSE	FALSE	FALSE	nuc	0	2043700	0	0	0	0	0	73753000	21491000	0	1	0	0	0	0	0	7	5
338	Heterogeneous nuclear ribonucleoprotein A/B OS=Homo sapiens OX=9606 GN=HNRNPAB PE=1 SV=1;Heterogeneous nuclear ribonucleoprotein A/B OS=Homo sapiens OX=9606 GN=HNRNPAB PE=1 SV=1;Heterogeneous nuclear ribonucleoprotein A/B OS=Homo sapiens OX=9606 GN=HNRNPAB	D6R9P3	HNRNPAB	30.302	0.758	4.11	0.637286	0.028157	1	0.145	FALSE	FALSE	FALSE	nuc	0	0	0	0	4255700	0	2573300	65587000	27575000	0	0	0	0	1	0	1	3	2
339	Heterogeneous nuclear ribonucleoproteins C1/C2 OS=Homo sapiens OX=9606 GN=HNRNPC PE=1 SV=1;Heterogeneous nuclear ribonucleoproteins C1/C2 (Fragment) OS=Homo sapiens OX=9606 GN=HNRNPC PE=1 SV=1;Heterogeneous nuclear ribonucleoproteins C1/C2 OS=Homo sapiens	G3V576	HNRNPC	25.256	0.354	0.942	0.801791	0.509067	1	0.563	FALSE	FALSE	FALSE	nuc	0	0	0	0	0	0	0	12001000	4013700	0	0	0	0	0	0	0	3	1
34	Heterogeneous nuclear ribonucleoprotein D0 (Fragment) OS=Homo sapiens OX=9606 GN=HNRNPD PE=1 SV=1;Heterogeneous nuclear ribonucleoprotein D0 (Fragment) OS=Homo sapiens OX=9606 GN=HNRNPD PE=1 SV=1;Heterogeneous nuclear ribonucleoprotein D0 (Fragment) OS=Hom	H0YA96	HNRNPD	23.811	0.407	5.2	0.786941	0.00692902	1	0.025	FALSE	TRUE	TRUE	nuc	1821000	13130000	3640000	0	3659500	7428600	17609000	181910000	98153000	1	2	1	0	2	2	2	4	4
340	Heterogeneous nuclear ribonucleoprotein D-like OS=Homo sapiens OX=9606 GN=HNRNPDL PE=1 SV=1	A0A087WU03	HNRNPDL	6.7215	0.767	0.962	0.429542	0.327052	1	0.496	FALSE	FALSE	FALSE	nuc	0	0	0	0	0	0	0	7727900	2842300	0	0	0	0	0	0	0	1	1
341	Heterogeneous nuclear ribonucleoprotein D-like, isoform CRA_b OS=Homo sapiens OX=9606 GN=HNRNPDL PE=1 SV=1;Heterogeneous nuclear ribonucleoprotein D-like OS=Homo sapiens OX=9606 GN=HNRNPDL PE=1 SV=3	A0A087WUK2	HNRNPDL.1	40.04	0.505	4.55	0.768273	0.0246082	1	0.127	FALSE	FALSE	FALSE	other	0	0	0	0	6286900	0	2983500	110970000	41689000	0	0	0	0	2	0	1	6	3
35	Heterogeneous nuclear ribonucleoprotein F OS=Homo sapiens OX=9606 GN=HNRNPF PE=1 SV=3	P52597	HNRNPF	45.671	0.356	2.71	0.532006	0.00100271	1	0.00044	FALSE	TRUE	TRUE	nuc	5753200	21875000	17121000	16975000	20873000	8546800	48353000	223080000	137360000	2	3	3	3	4	2	5	9	9
342	Heterogeneous nuclear ribonucleoprotein H OS=Homo sapiens OX=9606 GN=HNRNPH1 PE=1 SV=1;Heterogeneous nuclear ribonucleoprotein H OS=Homo sapiens OX=9606 GN=HNRNPH1 PE=1 SV=4;Heterogeneous nuclear ribonucleoprotein H OS=Homo sapiens OX=9606 GN=HNRNPH1 PE=1	G8JLB6	HNRNPH1	51.229	0.12	1.89	0.78086	0.00173832	1	0.00165	FALSE	FALSE	FALSE	nuc	76488000	115580000	69660000	66685000	125360000	101770000	255330000	643800000	484360000	6	5	5	6	7	5	7	10	10
343	Heterogeneous nuclear ribonucleoprotein H2 OS=Homo sapiens OX=9606 GN=HNRNPH2 PE=1 SV=1	P55795	HNRNPH2	49.263	1.3	3.69	0.313785	0.0155777	1	0.0774	FALSE	FALSE	FALSE	nuc	0	0	0	0	0	0	3057700	20749000	13056000	0	0	0	0	0	0	1	4	4
344	Heterogeneous nuclear ribonucleoprotein H3 OS=Homo sapiens OX=9606 GN=HNRNPH3 PE=1 SV=2	P31942	HNRNPH3	36.926	0.665	1.94	0.632926	0.184006	1	0.438	FALSE	FALSE	FALSE	nuc	0	0	0	0	0	0	0	28766000	0	0	0	0	0	0	0	0	5	0
36	Heterogeneous nuclear ribonucleoprotein K OS=Homo sapiens OX=9606 GN=HNRNPK PE=1 SV=1	P61978	HNRNPK	50.976	-0.143	3.58	0.854928	0.00135718	1	0.000908	FALSE	TRUE	TRUE	nuc	15084000	123900000	34303000	7448300	65183000	27229000	258310000	1023500000	637690000	0	2	1	1	2	1	4	3	4
345	Heterogeneous nuclear ribonucleoprotein K (Fragment) OS=Homo sapiens OX=9606 GN=HNRNPK PE=1 SV=1	Q5T6W2	HNRNPK.1	41.807	0.854	1.04	0.302325	0.214903	1	0.455	FALSE	FALSE	FALSE	other	0	0	0	0	0	0	0	3680800	1869400	0	0	0	0	0	0	0	1	1
37	Heterogeneous nuclear ribonucleoprotein L OS=Homo sapiens OX=9606 GN=HNRNPL PE=1 SV=2;Heterogeneous nuclear ribonucleoprotein L (Fragment) OS=Homo sapiens OX=9606 GN=HNRNPL PE=1 SV=1;Heterogeneous nuclear ribonucleoprotein L (Fragment) OS=Homo sapiens OX=9	P14866	HNRNPL	64.132	0.142	5.35	0.931129	0.00951649	1	0.0407	FALSE	TRUE	TRUE	nuc	0	11182000	1729500	0	7233700	1341100	11032000	313170000	95230000	0	5	1	0	5	1	5	15	11
346	Heterogeneous nuclear ribonucleoprotein L-like (Fragment) OS=Homo sapiens OX=9606 GN=HNRNPLL PE=1 SV=1;Heterogeneous nuclear ribonucleoprotein L-like (Fragment) OS=Homo sapiens OX=9606 GN=HNRNPLL PE=1 SV=1;Heterogeneous nuclear ribonucleoprotein L-like OS=	C9JJZ7	HNRNPLL	16.424	0.65	0.536	0.366868	0.452787	1	0.539	FALSE	FALSE	FALSE	nuc	0	0	0	0	0	0	0	553680	881330	0	0	0	0	0	0	0	1	1
347	Heterogeneous nuclear ribonucleoprotein M OS=Homo sapiens OX=9606 GN=HNRNPM PE=1 SV=1;Heterogeneous nuclear ribonucleoprotein M OS=Homo sapiens OX=9606 GN=HNRNPM PE=1 SV=3	A0A087X0X3	HNRNPM	77.569	0.714	1.56	0.21599	0.018426	1	0.0932	FALSE	FALSE	FALSE	nuc	11381000	28517000	61201000	75756000	962470000	60180000	131150000	523910000	93966000	5	7	12	7	10	13	13	19	17
348	Heterogeneous nuclear ribonucleoprotein R OS=Homo sapiens OX=9606 GN=HNRNPR PE=1 SV=1;Heterogeneous nuclear ribonucleoprotein R, isoform CRA_a OS=Homo sapiens OX=9606 GN=HNRNPR PE=1 SV=1	O43390	HNRNPR	70.942	0.778	1.68	0.470073	0.139176	1	0.402	FALSE	FALSE	FALSE	nuc	0	0	0	0	238750	0	0	9566800	595750	0	0	0	0	1	0	0	3	1
349	Heterogeneous nuclear ribonucleoprotein U OS=Homo sapiens OX=9606 GN=HNRNPU PE=1 SV=6;Heterogeneous nuclear ribonucleoprotein U OS=Homo sapiens OX=9606 GN=HNRNPU PE=1 SV=1;Heterogeneous nuclear ribonucleoprotein U OS=Homo sapiens OX=9606 GN=HNRNPU PE=1 SV=	Q00839	HNRNPU	90.583	0.316	1.82	0.499534	0.00330844	1	0.00656	FALSE	FALSE	FALSE	nuc	28346000	57870000	16139000	22575000	37077000	36032000	92312000	304050000	70654000	6	8	4	7	8	7	12	17	9
38	Heterogeneous nuclear ribonucleoprotein U-like protein 1 OS=Homo sapiens OX=9606 GN=HNRNPUL1 PE=1 SV=2;Heterogeneous nuclear ribonucleoprotein U-like protein 1 OS=Homo sapiens OX=9606 GN=HNRNPUL1 PE=1 SV=1;cDNA FLJ56481, highly similar to Heterogeneous nuc	Q9BUJ2	HNRNPUL1	95.737	0.712	6.52	0.312391	7.35991e-06	1	2.04e-14	FALSE	TRUE	TRUE	nuc	0	0	0	0	0	0	20729000	107070000	34698000	0	0	0	0	0	0	7	13	8
350	HCG2044799 OS=Homo sapiens OX=9606 GN=HNRNPUL2-BSCL2 PE=4 SV=1;Heterogeneous nuclear ribonucleoprotein U-like protein 2 OS=Homo sapiens OX=9606 GN=HNRNPUL2 PE=1 SV=1	H3BQZ7	HNRNPUL2-BSCL2	84.69	0.862	0.763	0.212611	0.265045	1	0.476	FALSE	FALSE	FALSE	other	0	0	0	0	0	0	0	1214900	0	0	0	0	0	0	0	0	1	0
351	3-hydroxyacyl-CoA dehydrogenase type-2 OS=Homo sapiens OX=9606 GN=HSD17B10 PE=1 SV=1;3-hydroxyacyl-CoA dehydrogenase type-2 OS=Homo sapiens OX=9606 GN=HSD17B10 PE=1 SV=3	Q5H928	HSD17B10	17.224	0.663	0.277	0.442098	0.74444	1	0.639	FALSE	FALSE	FALSE	other	0	0	0	0	0	0	0	2936300	0	0	0	0	0	0	0	0	1	0
352	Very-long-chain 3-oxoacyl-CoA reductase OS=Homo sapiens OX=9606 GN=HSD17B12 PE=1 SV=1;Very-long-chain 3-oxoacyl-CoA reductase OS=Homo sapiens OX=9606 GN=HSD17B12 PE=1 SV=2	A0A1B0GV93	HSD17B12	30.361	-0.751	-1.1	0.399134	0.229188	1	0.462	FALSE	FALSE	FALSE	other	0	0	5617100	0	0	3055700	0	0	0	0	0	1	0	0	1	0	0	0
353	Inactive hydroxysteroid dehydrogenase-like protein 1 (Fragment) OS=Homo sapiens OX=9606 GN=HSDL1 PE=1 SV=1;Inactive hydroxysteroid dehydrogenase-like protein 1 (Fragment) OS=Homo sapiens OX=9606 GN=HSDL1 PE=1 SV=1;Inactive hydroxysteroid dehydrogenase-like	H3BQI7	HSDL1	12.11	-0.322	-0.893	0.689058	0.28278	1	0.482	FALSE	FALSE	FALSE	mito	0	0	1897200	0	0	0	0	0	0	1	0	1	0	0	0	0	0	0
354	Heat shock protein HSP 90-alpha OS=Homo sapiens OX=9606 GN=HSP90AA1 PE=1 SV=5	P07900	HSP90AA1	84.659	-1.74	-4.83	0.40938	0.0413838	1	0.206	FALSE	FALSE	FALSE	cyto	14239000	60450000	96220000	2431800	38342000	34320000	0	50510000	5185700	2	7	10	1	6	7	0	8	1
355	Heat shock protein HSP 90-beta OS=Homo sapiens OX=9606 GN=HSP90AB1 PE=1 SV=4	P08238	HSP90AB1	83.263	-0.238	-0.692	0.592239	0.14326	1	0.406	FALSE	FALSE	FALSE	cyto	197210000	321860000	362850000	95584000	190360000	223260000	88735000	226860000	122850000	8	10	10	9	9	9	9	7	7
356	Putative heat shock protein HSP 90-beta 2 OS=Homo sapiens OX=9606 GN=HSP90AB2P PE=1 SV=2	Q58FF8	HSP90AB2P	44.348	1.77	0.411	0.0713304	0.643155	1	0.61	FALSE	FALSE	FALSE	other	0	0	0	0	4420900	0	0	0	0	0	0	0	0	1	0	0	0	0
357	Putative heat shock protein HSP 90-beta 4 OS=Homo sapiens OX=9606 GN=HSP90AB4P PE=5 SV=1	Q58FF6	HSP90AB4P	58.264	1.18	0.76	0.258279	0.455699	1	0.54	FALSE	FALSE	FALSE	other	0	3761100	3174900	0	0	0	0	3282000	0	0	1	1	0	0	0	0	1	0
358	Endoplasmin OS=Homo sapiens OX=9606 GN=HSP90B1 PE=1 SV=1	P14625	HSP90B1	92.468	1.69	-0.498	0.245457	0.722473	1	0.633	FALSE	FALSE	FALSE	other	8633000	4312900	14842000	2895800	5505900	5475500	4896200	8140400	0	5	2	2	2	3	3	2	2	0
359	Heat shock 70 kDa protein 1B OS=Homo sapiens OX=9606 GN=HSPA1B PE=1 SV=1;Heat shock 70 kDa protein 1B OS=Homo sapiens OX=9606 GN=HSPA1B PE=1 SV=1;Heat shock 70 kDa protein 1A OS=Homo sapiens OX=9606 GN=HSPA1A PE=1 SV=1;Heat shock 70 kDa protein 1A OS=Homo	A0A0G2JIW1	HSPA1B	70.108	-0.48	-0.25	0.256603	0.543241	1	0.576	FALSE	FALSE	FALSE	cyto	47198000	97972000	65697000	14655000	29413000	32940000	34028000	92333000	41032000	4	5	5	3	3	4	5	5	5
360	Endoplasmic reticulum chaperone BiP OS=Homo sapiens OX=9606 GN=HSPA5 PE=1 SV=2	P11021	HSPA5	72.332	-0.128	-0.306	0.754345	0.461779	1	0.543	FALSE	FALSE	FALSE	cyto	93377000	100730000	107810000	45511000	48148000	66661000	38207000	90369000	50982000	13	13	13	9	9	13	9	14	9
361	Heat shock 70 kDa protein 6 OS=Homo sapiens OX=9606 GN=HSPA6 PE=1 SV=2;Putative heat shock 70 kDa protein 7 OS=Homo sapiens OX=9606 GN=HSPA7 PE=5 SV=2	P17066	HSPA6	71.027	0.0994	2.1	0.943706	0.161305	1	0.422	FALSE	FALSE	FALSE	other	38998000	45325000	40355000	16492000	23243000	28391000	28263000	40361000	28621000	1	1	1	1	1	1	1	1	1
362	Heat shock cognate 71 kDa protein (Fragment) OS=Homo sapiens OX=9606 GN=HSPA8 PE=1 SV=8	E9PK54	HSPA8	19.955	-0.0751	0.981	0.94156	0.351903	1	0.503	FALSE	FALSE	FALSE	nuc	0	0	0	0	0	0	0	0	4643000	1	0	0	0	0	0	1	0	1
363	Heat shock cognate 71 kDa protein OS=Homo sapiens OX=9606 GN=HSPA8 PE=1 SV=1;Heat shock cognate 71 kDa protein OS=Homo sapiens OX=9606 GN=HSPA8 PE=1 SV=1;Heat shock cognate 71 kDa protein (Fragment) OS=Homo sapiens OX=9606 GN=HSPA8 PE=1 SV=1;Heat shock cog	P11142	HSPA8.1	70.897	-0.342	-0.091	0.415794	0.825327	1	0.658	FALSE	FALSE	FALSE	other	480420000	609030000	463710000	180510000	298340000	330960000	357770000	646710000	343570000	8	7	7	5	7	7	8	7	7
364	Stress-70 protein, mitochondrial OS=Homo sapiens OX=9606 GN=HSPA9 PE=1 SV=2	P38646	HSPA9	73.68	0.0134	-0.133	0.979394	0.799462	1	0.652	FALSE	FALSE	FALSE	mito	214660000	83445000	102880000	109330000	80794000	58553000	73731000	115870000	47414000	20	13	12	13	14	8	12	12	8
365	Heat shock protein beta-1 OS=Homo sapiens OX=9606 GN=HSPB1 PE=1 SV=2;Heat shock protein beta-1 OS=Homo sapiens OX=9606 GN=HSPB1 PE=1 SV=1	P04792	HSPB1	22.782	0.127	-0.175	0.771418	0.688781	1	0.624	FALSE	FALSE	FALSE	cyto	15007000	17178000	23562000	6577600	17532000	14114000	3139500	15371000	10772000	5	4	5	4	4	3	3	3	3
366	60 kDa heat shock protein, mitochondrial OS=Homo sapiens OX=9606 GN=HSPD1 PE=1 SV=2	P10809	HSPD1	61.054	0.0239	-0.258	0.95858	0.579549	1	0.59	FALSE	FALSE	FALSE	mito	184260000	77012000	171780000	79904000	69291000	121170000	55211000	178950000	45174000	20	10	14	15	9	13	10	15	9
367	10 kDa heat shock protein, mitochondrial OS=Homo sapiens OX=9606 GN=HSPE1 PE=1 SV=2;10 kDa heat shock protein, mitochondrial OS=Homo sapiens OX=9606 GN=HSPE1 PE=1 SV=1;10 kDa heat shock protein, mitochondrial OS=Homo sapiens OX=9606 GN=HSPE1 PE=1 SV=1;HSPE	P61604	HSPE1	10.932	1.03	2.11	0.495356	0.180213	1	0.435	FALSE	FALSE	FALSE	other	0	0	0	9039700	0	0	0	37638000	0	0	0	1	1	0	1	0	3	0
368	Heat shock protein 105 kDa OS=Homo sapiens OX=9606 GN=HSPH1 PE=1 SV=1;Heat shock protein 105 kDa OS=Homo sapiens OX=9606 GN=HSPH1 PE=1 SV=1	A0A0A0MSM0	HSPH1	88.841	-2.91	-0.269	0.000220353	0.581007	1	0.59	FALSE	FALSE	FALSE	cyto	3712600	11715000	6191200	499600	0	924880	2407900	6129500	2327400	2	5	3	1	0	1	2	3	2
369	HIV Tat-specific factor 1 OS=Homo sapiens OX=9606 GN=HTATSF1 PE=1 SV=1	O43719	HTATSF1	85.852	0.762	1.41	0.443042	0.172057	1	0.43	FALSE	FALSE	FALSE	nuc	0	0	0	0	0	0	1119500	1594200	3796800	1	0	0	0	0	0	2	1	2
370	Interleukin enhancer-binding factor 3 OS=Homo sapiens OX=9606 GN=ILF3 PE=1 SV=3	Q12906	ILF3	95.337	1.07	4.28	0.444715	0.0115828	1	0.0533	FALSE	FALSE	FALSE	other	0	0	0	0	0	0	0	48155000	10747000	0	0	0	0	0	0	0	11	4
371	Integrin-linked kinase-associated serine/threonine phosphatase 2C (Fragment) OS=Homo sapiens OX=9606 GN=ILKAP PE=1 SV=1;Integrin-linked kinase associated phosphatase OS=Homo sapiens OX=9606 GN=ILKAP PE=1 SV=1;Integrin-linked kinase-associated serine/threon	H7C2I8	ILKAP	22.883	0.958	0.841	0.227607	0.284665	1	0.483	FALSE	FALSE	FALSE	nuc	0	0	0	0	0	0	0	0	537290	0	0	0	0	0	0	0	0	1
372	MICOS complex subunit MIC60 OS=Homo sapiens OX=9606 GN=IMMT PE=1 SV=2;MICOS complex subunit MIC60 OS=Homo sapiens OX=9606 GN=IMMT PE=1 SV=1;MICOS complex subunit MIC60 OS=Homo sapiens OX=9606 GN=IMMT PE=1 SV=1;MICOS complex subunit MIC60 OS=Homo sapiens OX	B9A067	IMMT	78.973	0.0713	-0.494	0.939603	0.602823	1	0.597	FALSE	FALSE	FALSE	mito	3825800	0	1844000	0	0	0	0	0	0	2	0	1	0	0	0	0	0	0
39	Inosine-5-monophosphate dehydrogenase 2 (Fragment) OS=Homo sapiens OX=9606 GN=IMPDH2 PE=1 SV=1;Inosine-5-monophosphate dehydrogenase 2 OS=Homo sapiens OX=9606 GN=IMPDH2 PE=1 SV=2;Inosine-5-monophosphate dehydrogenase 2 (Fragment) OS=Homo sapiens OX=9606	H0Y4R1	IMPDH2	50.957	-4.03	-3.91	7.80127e-05	9.73838e-05	1	2.17e-07	FALSE	TRUE	TRUE	cyto	13839000	11751000	6490500	1442000	1522400	1976100	1467200	1886400	1130800	3	5	3	1	1	2	1	1	1
373	Importin-4 OS=Homo sapiens OX=9606 GN=IPO4 PE=1 SV=1;Importin-4 OS=Homo sapiens OX=9606 GN=IPO4 PE=1 SV=2;Importin-4 OS=Homo sapiens OX=9606 GN=IPO4 PE=1 SV=1;Importin-4 OS=Homo sapiens OX=9606 GN=IPO4 PE=1 SV=1;Importin-4 OS=Homo sapiens OX=9606 GN=IPO4 P	H0YN14	IPO4	101.49	-1.03	-1.33	0.169544	0.0861919	1	0.33	FALSE	FALSE	FALSE	cyto	0	4925500	1865500	0	0	0	0	0	0	0	2	1	0	0	0	0	0	0
40	Importin-5 OS=Homo sapiens OX=9606 GN=IPO5 PE=1 SV=4;Importin-5 (Fragment) OS=Homo sapiens OX=9606 GN=IPO5 PE=1 SV=1	O00410	IPO5	123.63	-4.18	-6.5	0.0279833	0.00302533	1	0.00551	FALSE	TRUE	TRUE	cyto	178600000	121550000	104920000	6790900	6180300	22251000	0	7522200	3372700	15	15	15	2	1	7	1	2	1
374	Importin-7 OS=Homo sapiens OX=9606 GN=IPO7 PE=1 SV=1	O95373	IPO7	119.52	0.445	0.483	0.587362	0.556958	1	0.582	FALSE	FALSE	FALSE	other	0	0	0	0	0	0	0	2813000	0	0	0	0	0	0	0	0	1	0
375	Iroquois-class homeodomain protein IRX-4 OS=Homo sapiens OX=9606 GN=IRX4 PE=1 SV=2	P78413	IRX4	54.444	1.9	0.117	0.137573	0.921552	1	0.679	FALSE	FALSE	FALSE	nuc	0	0	0	0	10873000	0	0	0	0	0	0	0	0	1	0	0	0	0
376	Inositol 1,4,5-trisphosphate receptor type 1 OS=Homo sapiens OX=9606 GN=ITPR1 PE=1 SV=1;ITPR1 protein OS=Homo sapiens OX=9606 GN=ITPR1 PE=1 SV=1;Inositol 1,4,5-trisphosphate receptor type 1 OS=Homo sapiens OX=9606 GN=ITPR1 PE=1 SV=1;Inositol 1,4,5-trisphos	A0A3B3IRT5	ITPR1	33.307	0.721	0.327	0.34656	0.662799	1	0.616	FALSE	FALSE	FALSE	other	0	0	0	0	994860	0	0	0	0	0	0	0	0	1	0	0	0	0
377	Involucrin OS=Homo sapiens OX=9606 GN=IVL PE=1 SV=2	P07476	IVL	68.478	0.569	1.32	0.585405	0.224223	1	0.46	FALSE	FALSE	FALSE	cyto	0	0	0	0	0	0	0	0	2628300	0	0	0	0	0	0	0	0	1
378	Junction plakoglobin OS=Homo sapiens OX=9606 GN=JUP PE=1 SV=3	P14923	JUP	81.744	0.384	1.49	0.737393	0.212953	1	0.454	FALSE	FALSE	FALSE	other	0	0	0	526850	0	0	0	0	6750800	0	0	0	1	0	0	0	0	3
379	Katanin p60 ATPase-containing subunit A-like 2 (Fragment) OS=Homo sapiens OX=9606 GN=KATNAL2 PE=1 SV=1;Katanin p60 ATPase-containing subunit A-like 2 (Fragment) OS=Homo sapiens OX=9606 GN=KATNAL2 PE=1 SV=1;Katanin p60 ATPase-containing subunit A-like 2 OS=	K7EM02	KATNAL2	13.999	0.301	1.24	0.712491	0.153458	1	0.415	FALSE	FALSE	FALSE	nuc	0	0	0	0	0	0	2105800	0	0	0	0	1	0	0	0	1	0	0
380	BTB/POZ domain-containing protein KCTD5 OS=Homo sapiens OX=9606 GN=KCTD5 PE=1 SV=1	Q9NXV2	KCTD5	26.092	0.688	0.376	0.430177	0.661584	1	0.616	FALSE	FALSE	FALSE	other	0	0	0	0	0	0	0	1167900	0	0	0	0	0	0	0	0	1	0
381	ER lumen protein-retaining receptor 1 (Fragment) OS=Homo sapiens OX=9606 GN=KDELR1 PE=1 SV=1;ER lumen protein-retaining receptor 2 OS=Homo sapiens OX=9606 GN=KDELR2 PE=1 SV=1;ER lumen protein-retaining receptor 1 OS=Homo sapiens OX=9606 GN=KDELR1 PE=1 SV=1	M0R1Y2	KDELR1	24.844	0.448	0.889	0.658301	0.388773	1	0.516	FALSE	FALSE	FALSE	other	3828100	3304400	5438800	2819800	0	3199800	4403900	0	0	1	1	1	1	1	1	1	0	0
41	KH domain-containing, RNA-binding, signal transduction-associated protein 1 OS=Homo sapiens OX=9606 GN=KHDRBS1 PE=1 SV=1	Q07666	KHDRBS1	48.227	2.53	7.04	0.015376	2.34575e-05	1	1.09e-10	FALSE	TRUE	TRUE	nuc	1322500	1505000	1607900	1184700	4977000	1527100	42364000	93486000	68052000	1	2	1	1	2	1	4	4	5
42	Far upstream element-binding protein 2 OS=Homo sapiens OX=9606 GN=KHSRP PE=1 SV=1;Far upstream element-binding protein 2 OS=Homo sapiens OX=9606 GN=KHSRP PE=1 SV=4;Far upstream element-binding protein 2 (Fragment) OS=Homo sapiens OX=9606 GN=KHSRP PE=1 SV=1	A0A087WTP3	KHSRP	73.027	-1.77	5.71	0.00933873	3.44086e-06	1	1.11e-14	FALSE	TRUE	TRUE	nuc	1608900	6441900	4454400	0	0	0	71822000	139800000	138170000	2	2	3	1	1	0	14	17	16
382	Uncharacterized protein OS=Homo sapiens OX=9606 PE=1 SV=1;HCG2039386, isoform CRA_b OS=Homo sapiens OX=9606 GN=PCLAF PE=1 SV=1;Uncharacterized protein OS=Homo sapiens OX=9606 PE=1 SV=1;PCNA-associated factor OS=Homo sapiens OX=9606 GN=PCLAF PE=1 SV=1	A0A0U1RQC1	KIAA0101	5.1369	0.697	0.519	0.315502	0.448868	1	0.537	FALSE	FALSE	FALSE	other	0	0	0	0	0	0	1384000	1791100	1551400	0	0	0	0	0	0	1	1	1
383	Kinesin-like protein KIF20A OS=Homo sapiens OX=9606 GN=KIF20A PE=1 SV=1;Kinesin-like protein KIF20A (Fragment) OS=Homo sapiens OX=9606 GN=KIF20A PE=1 SV=1	O95235	KIF20A	100.28	0.232	1.4	0.799167	0.151562	1	0.414	FALSE	FALSE	FALSE	other	0	0	0	0	0	0	2605100	0	2169600	0	0	0	0	0	0	2	0	2
384	Kinesin-like protein KIF2C (Fragment) OS=Homo sapiens OX=9606 GN=KIF2C PE=1 SV=1;Kinesin-like protein KIF2C OS=Homo sapiens OX=9606 GN=KIF2C PE=1 SV=2;Kinesin-like protein KIF2C (Fragment) OS=Homo sapiens OX=9606 GN=KIF2C PE=1 SV=1	Q5JR91	KIF2C	37.921	-0.39	-0.478	0.622796	0.5481	1	0.578	FALSE	FALSE	FALSE	nuc	0	2249700	0	0	0	0	0	0	0	0	2	0	0	0	0	0	0	0
385	Chromosome-associated kinesin KIF4A OS=Homo sapiens OX=9606 GN=KIF4A PE=1 SV=3;Chromosome-associated kinesin KIF4B OS=Homo sapiens OX=9606 GN=KIF4B PE=2 SV=2	O95239	KIF4A	139.88	0.804	1.35	0.380369	0.156817	1	0.418	FALSE	FALSE	FALSE	nuc	0	0	0	0	0	0	2585700	1581400	1680000	0	0	0	0	0	0	2	1	1
386	Kinesin-1 heavy chain OS=Homo sapiens OX=9606 GN=KIF5B PE=1 SV=1	P33176	KIF5B	109.68	0.0797	-0.417	0.915259	0.581537	1	0.59	FALSE	FALSE	FALSE	cyto	0	1255800	1584400	0	0	467940	0	0	0	0	1	1	0	0	0	0	0	0
387	Importin subunit alpha-1 OS=Homo sapiens OX=9606 GN=KPNA2 PE=1 SV=1;Importin subunit alpha-1 (Fragment) OS=Homo sapiens OX=9606 GN=KPNA2 PE=1 SV=1;Importin subunit alpha-1 (Fragment) OS=Homo sapiens OX=9606 GN=KPNA2 PE=1 SV=1	P52292	KPNA2	57.861	-1.47	-0.162	0.307015	0.907246	1	0.676	FALSE	FALSE	FALSE	nuc	4122900	8373100	8622100	0	1504600	2850100	528450	13954000	2519600	2	2	2	0	1	1	2	3	1
388	Importin subunit beta-1 OS=Homo sapiens OX=9606 GN=KPNB1 PE=1 SV=2;Importin subunit beta-1 (Fragment) OS=Homo sapiens OX=9606 GN=KPNB1 PE=1 SV=8;Importin subunit beta-1 (Fragment) OS=Homo sapiens OX=9606 GN=KPNB1 PE=1 SV=1	Q14974	KPNB1	97.169	0.531	0.558	0.513935	0.493425	1	0.557	FALSE	FALSE	FALSE	nuc	1135300	0	2931300	0	0	0	0	3011200	0	1	0	1	0	0	0	0	1	0
389	Keratinocyte proline-rich protein OS=Homo sapiens OX=9606 GN=KPRP PE=1 SV=1	Q5T749	KPRP	64.135	0.678	3.37	0.743057	0.129636	1	0.392	FALSE	FALSE	FALSE	other	0	0	0	1992700	0	0	0	0	147460000	0	0	0	1	0	0	0	0	10
390	Keratin, type I cytoskeletal 18 OS=Homo sapiens OX=9606 GN=KRT18 PE=1 SV=1;Keratin, type I cytoskeletal 18 OS=Homo sapiens OX=9606 GN=KRT18 PE=1 SV=2	F8VZY9	KRT18	43.774	0.116	-2.09	0.934915	0.165619	1	0.425	FALSE	FALSE	FALSE	cyto	3994100	2655600	3617800	2385000	2376200	13905000	2517100	2093800	1805000	3	1	2	2	2	5	2	1	2
391	Keratin, type II cytoskeletal 6B OS=Homo sapiens OX=9606 GN=KRT6B PE=1 SV=5	P04259	KRT6B	60.066	1.47	1.03	0.446984	0.590372	1	0.593	FALSE	FALSE	FALSE	other	93431000	25043000	9067700	188150000	64560000	26905000	3773600	33569000	988580000	0	0	0	0	0	0	0	0	1
392	Kinectin OS=Homo sapiens OX=9606 GN=KTN1 PE=1 SV=1;Kinectin OS=Homo sapiens OX=9606 GN=KTN1 PE=1 SV=1	G3V4Y7	KTN1	68.943	1.4	1.2	0.0790307	0.121387	1	0.383	FALSE	FALSE	FALSE	other	0	0	327990	0	0	556570	0	0	0	0	0	1	0	0	1	0	0	0
393	La-related protein 1 OS=Homo sapiens OX=9606 GN=LARP1 PE=1 SV=2	Q6PKG0	LARP1	123.51	-0.0734	-0.494	0.942318	0.628492	1	0.606	FALSE	FALSE	FALSE	other	2994900	8277900	1410500	0	0	0	0	1203200	0	2	4	1	0	0	0	0	1	0
43	La-related protein 4 OS=Homo sapiens OX=9606 GN=LARP4 PE=1 SV=3;C-Mpl binding protein OS=Homo sapiens OX=9606 GN=LARP4 PE=1 SV=1;La-related protein 4 (Fragment) OS=Homo sapiens OX=9606 GN=LARP4 PE=1 SV=1	Q71RC2	LARP4	80.595	-1.57	-4.49	0.126543	0.00111666	1	0.000568	FALSE	TRUE	TRUE	cyto	16513000	27606000	17846000	3256900	0	2504200	0	0	0	5	6	6	3	0	4	0	0	0
44	Ribosomal biogenesis protein LAS1L OS=Homo sapiens OX=9606 GN=LAS1L PE=1 SV=2	Q9Y4W2	LAS1L	83.064	0.86	4.39	0.227342	0.000135009	1	7.97e-07	FALSE	TRUE	TRUE	nuc	0	0	0	0	0	0	7841300	9010400	7888700	0	0	0	0	0	0	3	3	2
394	LIM and SH3 domain protein 1 (Fragment) OS=Homo sapiens OX=9606 GN=LASP1 PE=1 SV=1;LIM and SH3 domain protein 1 OS=Homo sapiens OX=9606 GN=LASP1 PE=1 SV=2	C9J9W2	LASP1	18.98	-1.38	-1.51	0.270281	0.232834	1	0.463	FALSE	FALSE	FALSE	cyto	3038200	14326000	486070	0	385600	245440	0	289960	0	2	3	2	0	1	1	0	1	0
395	Neutrophil gelatinase-associated lipocalin OS=Homo sapiens OX=9606 GN=LCN2 PE=1 SV=1;Neutrophil gelatinase-associated lipocalin OS=Homo sapiens OX=9606 GN=LCN2 PE=1 SV=2	X6R8F3	LCN2	22.788	0.601	1.42	0.520756	0.151658	1	0.414	FALSE	FALSE	FALSE	other	0	0	0	0	0	0	0	0	4454600	0	0	0	0	0	0	0	0	1
396	L-lactate dehydrogenase A chain OS=Homo sapiens OX=9606 GN=LDHA PE=1 SV=2	P00338	LDHA	36.688	-5.16e-05	-0.52	0.99991	0.274919	1	0.48	FALSE	FALSE	FALSE	cyto	23425000	52846000	56458000	10879000	32355000	35141000	8810300	38366000	13359000	4	7	6	3	5	4	2	5	4
397	L-lactate dehydrogenase B chain OS=Homo sapiens OX=9606 GN=LDHB PE=1 SV=2;L-lactate dehydrogenase OS=Homo sapiens OX=9606 PE=3 SV=1;L-lactate dehydrogenase (Fragment) OS=Homo sapiens OX=9606 GN=LDHB PE=1 SV=1	P07195	LDHB	36.638	-0.321	-0.613	0.824375	0.673319	1	0.619	FALSE	FALSE	FALSE	cyto	3231600	6612300	23911000	3391400	2897500	8001100	1887100	10031000	4380600	1	2	5	2	1	3	1	3	2
398	Leukocyte receptor cluster member 8 (Fragment) OS=Homo sapiens OX=9606 GN=LENG8 PE=1 SV=1;Leukocyte receptor cluster member 8 OS=Homo sapiens OX=9606 GN=LENG8 PE=1 SV=2;Leukocyte receptor cluster member 8 OS=Homo sapiens OX=9606 GN=LENG8 PE=1 SV=1;Leukocyt	A0A0G2JNN3	LENG8	79.376	1.24	0.773	0.151921	0.352872	1	0.503	FALSE	FALSE	FALSE	nuc	0	0	1006100	563390	0	1216100	1094100	1485200	0	0	0	1	1	0	1	1	1	0
399	Galectin-1 OS=Homo sapiens OX=9606 GN=LGALS1 PE=1 SV=2	P09382	LGALS1	14.716	-0.129	0.789	0.785831	0.121841	1	0.384	FALSE	FALSE	FALSE	cyto	38275000	56429000	26965000	19325000	22550000	8348600	55937000	121800000	22251000	3	4	3	3	3	3	3	4	3
400	Galectin-3 OS=Homo sapiens OX=9606 GN=LGALS3 PE=1 SV=5	P17931	LGALS3	26.152	0.849	1.01	0.2764	0.203558	1	0.449	FALSE	FALSE	FALSE	other	2270900	3034000	4091200	0	1220000	0	1369700	3017300	1970100	1	1	1	0	1	0	1	1	1
401	LIM domain and actin-binding protein 1 OS=Homo sapiens OX=9606 GN=LIMA1 PE=1 SV=1;LIM domain and actin-binding protein 1 OS=Homo sapiens OX=9606 GN=LIMA1 PE=1 SV=1;LIM domain and actin-binding protein 1 OS=Homo sapiens OX=9606 GN=LIMA1 PE=1 SV=1;LIM domain	F8VQE1	LIMA1	66.99	-1.86	-2.39	0.0379473	0.0124578	1	0.0587	FALSE	FALSE	FALSE	other	4681800	11112000	6990900	885560	1025600	940530	1956800	1394600	691320	3	3	3	2	2	1	2	1	1
402	Protein ERGIC-53 OS=Homo sapiens OX=9606 GN=LMAN1 PE=1 SV=2	P49257	LMAN1	57.548	-3.29	-3.74	0.0620693	0.0387121	1	0.195	FALSE	FALSE	FALSE	other	14081000	12936000	31500000	3592300	6349200	10711000	6222800	0	2961300	2	2	5	1	2	2	2	0	2
403	Prelamin-A/C OS=Homo sapiens OX=9606 GN=LMNA PE=1 SV=1;Prelamin-A/C OS=Homo sapiens OX=9606 GN=LMNA PE=1 SV=1;Prelamin-A/C OS=Homo sapiens OX=9606 GN=LMNA PE=1 SV=1	P02545	LMNA	74.139	0.0109	1.28	0.983162	0.0324549	1	0.166	FALSE	FALSE	FALSE	nuc	32794000	92330000	76601000	13550000	99290000	80609000	115630000	335950000	165610000	8	13	13	5	15	14	18	21	19
404	Lamin-B1 OS=Homo sapiens OX=9606 GN=LMNB1 PE=1 SV=2;Lamin-B1 OS=Homo sapiens OX=9606 GN=LMNB1 PE=1 SV=1;Lamin B1, isoform CRA_a OS=Homo sapiens OX=9606 GN=LMNB1 PE=1 SV=1	P20700	LMNB1	66.408	0.415	0.765	0.35922	0.110119	1	0.369	FALSE	FALSE	FALSE	nuc	84089000	131820000	142310000	50738000	190660000	117970000	103850000	369930000	195450000	10	15	16	9	18	15	15	23	18
405	Lamin-B2 OS=Homo sapiens OX=9606 GN=LMNB2 PE=1 SV=4	Q03252	LMNB2	69.948	0.582	0.779	0.296344	0.173004	1	0.43	FALSE	FALSE	FALSE	nuc	4016400	15272000	21908000	3943900	29555000	11488000	9551800	34641000	24134000	2	5	7	2	8	5	5	9	10
406	Loricrin OS=Homo sapiens OX=9606 GN=LOR PE=1 SV=2	P23490	LOR	25.76	0.132	1.15	0.901988	0.300625	1	0.488	FALSE	FALSE	FALSE	other	0	0	0	0	0	0	0	0	3726300	0	0	0	0	0	0	0	0	1
407	Lipoprotein lipase OS=Homo sapiens OX=9606 GN=LPL PE=1 SV=1	P06858	LPL	53.162	-0.448	-0.702	0.587858	0.402166	1	0.521	FALSE	FALSE	FALSE	other	0	0	3006500	0	0	0	0	0	0	0	0	2	0	0	0	0	0	0
408	Leucine-rich PPR motif-containing protein, mitochondrial OS=Homo sapiens OX=9606 GN=LRPPRC PE=1 SV=3	P42704	LRPPRC	157.9	-0.398	-0.488	0.645149	0.574129	1	0.588	FALSE	FALSE	FALSE	mito	0	8217000	3848700	0	0	2021200	0	0	0	0	1	2	0	0	1	0	0	0
409	Leucine-rich repeat flightless-interacting protein 1 OS=Homo sapiens OX=9606 GN=LRRFIP1 PE=1 SV=2	Q32MZ4	LRRFIP1	89.252	0.854	-0.0041	0.29196	0.99581	1	0.693	FALSE	FALSE	FALSE	cyto	1075100	0	0	0	0	0	0	0	0	1	1	0	0	0	0	0	0	0
410	Protein LTV1 homolog OS=Homo sapiens OX=9606 GN=LTV1 PE=1 SV=1;Uncharacterized protein OS=Homo sapiens OX=9606 PE=4 SV=2	Q96GA3	LTV1	54.854	-0.343	-0.0841	0.591623	0.894497	1	0.673	FALSE	FALSE	FALSE	cyto	1109500	0	1345300	337980	0	893500	0	0	0	1	0	1	1	1	2	0	0	0
411	LUC7-like (S. cerevisiae) (Fragment) OS=Homo sapiens OX=9606 GN=LUC7L PE=1 SV=1;LUC7-like (S. cerevisiae), isoform CRA_f OS=Homo sapiens OX=9606 GN=LUC7L PE=1 SV=1;Putative RNA-binding protein Luc7-like 2 OS=Homo sapiens OX=9606 GN=LUC7L2 PE=4 SV=1;Putativ	B8ZZ10	LUC7L	21.372	0.838	1.45	0.35111	0.12336	1	0.385	FALSE	FALSE	FALSE	nuc	2421700	0	1378500	2886700	0	1686500	3166600	0	3269300	1	0	1	1	0	1	2	0	1
412	Cisplatin resistance-associated overexpressed protein, isoform CRA_b OS=Homo sapiens OX=9606 GN=LUC7L3 PE=1 SV=1;Luc7-like protein 3 OS=Homo sapiens OX=9606 GN=LUC7L3 PE=1 SV=2	J3KPP4	LUC7L3	58.22	0.594	1.61	0.571001	0.146418	1	0.409	FALSE	FALSE	FALSE	nuc	0	0	0	1965000	0	0	4588300	1798800	0	0	0	0	1	0	0	1	1	0
45	Microtubule-associated protein OS=Homo sapiens OX=9606 GN=MAP4 PE=1 SV=1;Microtubule-associated protein 4 OS=Homo sapiens OX=9606 GN=MAP4 PE=1 SV=3	E7EVA0	MAP4	245.44	-1.49	-3.52	0.129546	0.00377324	1	0.00847	FALSE	TRUE	TRUE	cyto	15443000	37173000	15039000	1597800	3999100	6543500	906380	1019800	4118800	6	12	5	2	3	5	1	1	3
413	MAPK-interacting and spindle-stabilizing protein-like OS=Homo sapiens OX=9606 GN=MAPK1IP1L PE=1 SV=4	Q8NDC0	MAPK1IP1L	24.269	0.142	1.68	0.885801	0.115501	1	0.376	FALSE	FALSE	FALSE	other	0	0	0	0	0	0	0	10500000	6783900	0	0	0	0	1	0	0	1	1
46	Mitochondrial amidoxime-reducing component 1 OS=Homo sapiens OX=9606 GN=MARC1 PE=1 SV=1;Mitochondrial amidoxime-reducing component 1 (Fragment) OS=Homo sapiens OX=9606 GN=MARC1 PE=1 SV=1	Q5VT66	2001-03-01	37.499	-0.429	-7.49	0.347799	8.12587e-08	1	1.11e-14	FALSE	TRUE	TRUE	other	164130000	111890000	170170000	33001000	26234000	77432000	0	0	0	10	9	10	5	7	8	0	0	0
414	E3 ubiquitin-protein ligase MARCH5 OS=Homo sapiens OX=9606 GN=MARCH5 PE=1 SV=1	Q9NX47	2005-03-01	31.231	-0.126	0.106	0.921171	0.933453	1	0.681	FALSE	FALSE	FALSE	other	6801200	1075600	4707000	0	0	0	0	0	0	1	1	1	0	0	0	0	0	0
415	Myristoylated alanine-rich C-kinase substrate OS=Homo sapiens OX=9606 GN=MARCKS PE=1 SV=4	P29966	MARCKS	31.554	-1.09	-0.791	0.0272743	0.0865752	1	0.331	FALSE	FALSE	FALSE	other	16943000	19968000	13209000	2535300	3101600	4113400	4686600	5757100	6799400	6	4	3	3	2	2	3	2	4
416	Methionine--tRNA ligase, cytoplasmic OS=Homo sapiens OX=9606 GN=MARS PE=1 SV=2;Methionine--tRNA ligase, cytoplasmic OS=Homo sapiens OX=9606 GN=MARS PE=1 SV=2;Methionine--tRNA ligase, cytoplasmic (Fragment) OS=Homo sapiens OX=9606 GN=MARS PE=1 SV=1	P56192	MARS	101.11	0.0906	0.141	0.921157	0.87783	1	0.67	FALSE	FALSE	FALSE	other	1900300	0	1023600	0	625910	765010	0	0	0	2	0	1	0	1	1	0	0	0
417	Serine/threonine-protein kinase greatwall OS=Homo sapiens OX=9606 GN=MASTL PE=1 SV=1	Q96GX5	MASTL	97.318	0.812	0.487	0.136927	0.350936	1	0.503	FALSE	FALSE	FALSE	nuc	0	0	0	0	0	0	501180	0	0	0	0	0	0	0	0	1	0	0
418	S-adenosylmethionine synthase isoform type-2 OS=Homo sapiens OX=9606 GN=MAT2A PE=1 SV=1	P31153	MAT2A	43.66	0.838	1.54	0.48156	0.212597	1	0.454	FALSE	FALSE	FALSE	nuc	4826500	4076100	0	0	0	0	3147000	11467000	0	1	1	0	0	0	0	1	3	1
47	Matrin-3 OS=Homo sapiens OX=9606 GN=MATR3 PE=1 SV=1;Matrin-3 OS=Homo sapiens OX=9606 GN=MATR3 PE=1 SV=1;Matrin-3 OS=Homo sapiens OX=9606 GN=MATR3 PE=1 SV=2;Matrin-3 OS=Homo sapiens OX=9606 GN=MATR3 PE=1 SV=1;cDNA FLJ10526 fis, clone NT2RP2000931, highly si	A0A0R4J2E8	MATR3	94.622	-2.33	4.77	0.0218203	0.000367608	1	2.67e-05	FALSE	TRUE	TRUE	nuc	0	9897800	6548100	0	1631200	2784900	71086000	116740000	66191000	1	3	3	0	1	1	7	8	11
48	Mitochondrial antiviral-signaling protein OS=Homo sapiens OX=9606 GN=MAVS PE=1 SV=2	Q7Z434	MAVS	56.527	-3.43	-4.37	0.00128391	0.000257462	1	8.37e-06	FALSE	TRUE	TRUE	mito	12590000	7015900	12096000	0	1112100	1833300	0	0	0	3	2	3	0	1	1	0	0	0
419	Methylcrotonoyl-CoA carboxylase subunit alpha, mitochondrial OS=Homo sapiens OX=9606 GN=MCCC1 PE=1 SV=3;Methylcrotonoyl-CoA carboxylase subunit alpha, mitochondrial OS=Homo sapiens OX=9606 GN=MCCC1 PE=1 SV=1;Methylcrotonoyl-CoA carboxylase subunit alpha, m	Q96RQ3	MCCC1	80.472	0.215	-0.589	0.665602	0.253394	1	0.472	FALSE	FALSE	FALSE	mito	1515900000	1200600000	1442300000	1139700000	962200000	1316300000	870910000	658040000	604510000	22	23	22	24	23	22	22	22	19
420	Methylcrotonoyl-CoA carboxylase beta chain, mitochondrial OS=Homo sapiens OX=9606 GN=MCCC2 PE=1 SV=1;Methylcrotonoyl-CoA carboxylase beta chain, mitochondrial (Fragment) OS=Homo sapiens OX=9606 GN=MCCC2 PE=1 SV=2;Methylcrotonoyl-CoA carboxylase beta chain,	Q9HCC0	MCCC2	61.332	-1.18	-2.56	0.553699	0.215391	1	0.455	FALSE	FALSE	FALSE	mito	60795000	20172000	50547000	53095000	1046700	33712000	16749000	0	5724900	9	7	8	9	2	7	5	0	2
49	DNA helicase (Fragment) OS=Homo sapiens OX=9606 GN=MCM2 PE=1 SV=1;DNA replication licensing factor MCM2 OS=Homo sapiens OX=9606 GN=MCM2 PE=1 SV=4	H0Y8E6	MCM2	93.998	0.0302	2.23	0.965631	0.0106497	1	0.0476	FALSE	TRUE	TRUE	nuc	0	0	0	0	0	0	1910000	3379200	2741100	0	0	0	0	0	0	2	2	2
50	DNA replication licensing factor MCM3 OS=Homo sapiens OX=9606 GN=MCM3 PE=1 SV=3;DNA replication licensing factor MCM3 OS=Homo sapiens OX=9606 GN=MCM3 PE=1 SV=2	P25205	MCM3	90.98	0.511	5.1	0.296492	2.83957e-06	1	1.11e-14	FALSE	TRUE	TRUE	nuc	0	0	0	0	0	0	12554000	18682000	16570000	0	0	0	0	0	0	4	6	6
421	DNA replication licensing factor MCM4 (Fragment) OS=Homo sapiens OX=9606 GN=MCM4 PE=1 SV=8;DNA helicase OS=Homo sapiens OX=9606 GN=MCM4 PE=1 SV=1;DNA helicase OS=Homo sapiens OX=9606 GN=MCM4 PE=1 SV=1;DNA helicase OS=Homo sapiens OX=9606 GN=MCM4 PE=1 SV=1;	E5RFR3	MCM4	14.698	0.828	0.805	0.220448	0.232392	1	0.463	FALSE	FALSE	FALSE	nuc	0	0	0	0	0	0	0	698380	730250	0	0	0	0	0	0	0	1	1
422	DNA replication licensing factor MCM6 OS=Homo sapiens OX=9606 GN=MCM6 PE=1 SV=1	Q14566	MCM6	92.888	-0.0221	0.785	0.982236	0.438332	1	0.532	FALSE	FALSE	FALSE	nuc	0	0	2339900	0	0	0	2900500	5331300	4439700	0	0	1	0	0	0	2	3	2
423	DNA replication licensing factor MCM7 OS=Homo sapiens OX=9606 GN=MCM7 PE=1 SV=4	P33993	MCM7	81.307	0.0889	0.903	0.927728	0.36928	1	0.509	FALSE	FALSE	FALSE	nuc	0	0	0	0	0	0	1419500	5964000	1843400	0	0	0	0	0	0	1	2	1
424	Mini-chromosome maintenance complex-binding protein OS=Homo sapiens OX=9606 GN=MCMBP PE=1 SV=2	Q9BTE3	MCMBP	72.979	0.892	1.39	0.42291	0.224059	1	0.459	FALSE	FALSE	FALSE	nuc	0	1222000	0	0	0	0	1491200	9734300	1658400	0	1	0	0	0	0	1	4	1
425	7SK snRNA methylphosphate capping enzyme OS=Homo sapiens OX=9606 GN=MEPCE PE=1 SV=1	Q7L2J0	MEPCE	74.354	0.688	0.631	0.27989	0.31875	1	0.493	FALSE	FALSE	FALSE	nuc	0	0	0	0	0	0	0	1156800	0	0	0	0	0	0	0	0	1	0
51	Mitochondrial fission factor OS=Homo sapiens OX=9606 GN=MFF PE=1 SV=1;Mitochondrial fission factor OS=Homo sapiens OX=9606 GN=MFF PE=1 SV=1;Mitochondrial fission factor (Fragment) OS=Homo sapiens OX=9606 GN=MFF PE=1 SV=1	Q9GZY8	MFF	38.464	-1.62	-7.81	0.026375	8.42088e-07	1	1.11e-14	FALSE	TRUE	TRUE	mito	173490000	128530000	126740000	20158000	9448100	36886000	0	0	0	12	9	11	6	3	7	0	0	0
426	Mitofusin-1 (Fragment) OS=Homo sapiens OX=9606 GN=MFN1 PE=1 SV=1;Mitofusin-1 OS=Homo sapiens OX=9606 GN=MFN1 PE=1 SV=3	H7C5H5	MFN1	56.235	-0.386	-1.06	0.612959	0.183743	1	0.437	FALSE	FALSE	FALSE	mito	0	1564600	0	0	0	0	0	0	0	0	1	0	0	0	0	0	0	0
427	Mitofusin-2 OS=Homo sapiens OX=9606 GN=MFN2 PE=1 SV=3	O95140	MFN2	86.401	-1.05	-1.11	0.189591	0.170522	1	0.428	FALSE	FALSE	FALSE	mito	1754700	3870700	3126200	0	0	0	0	0	0	2	3	1	0	0	0	0	0	0
428	Microsomal glutathione S-transferase 3 OS=Homo sapiens OX=9606 GN=MGST3 PE=1 SV=1;Microsomal glutathione S-transferase 3 OS=Homo sapiens OX=9606 GN=MGST3 PE=1 SV=1	Q5VV89	MGST3	18.416	0.371	0.376	0.596265	0.591752	1	0.594	FALSE	FALSE	FALSE	nuc	0	0	2232700	0	0	0	2126500	2193600	0	0	0	1	0	0	0	1	1	0
429	Mid1-interacting protein 1 OS=Homo sapiens OX=9606 GN=MID1IP1 PE=1 SV=1	Q9NPA3	MID1IP1	20.201	0.055	-0.65	0.961873	0.575873	1	0.588	FALSE	FALSE	FALSE	other	4468400	0	0	0	0	0	0	0	0	1	0	0	0	0	0	0	0	0
430	Mitotic interactor and substrate of PLK1 OS=Homo sapiens OX=9606 GN=MISP PE=1 SV=1	Q8IVT2	MISP	75.356	-0.416	-1.71	0.702389	0.140436	1	0.403	FALSE	FALSE	FALSE	other	16412000	8569700	12210000	1829700	7858100	5764800	5064700	8718600	1754600	6	4	4	3	4	5	2	3	2
431	Proliferation marker protein Ki-67 OS=Homo sapiens OX=9606 GN=MKI67 PE=1 SV=2	P46013	MKI67	358.69	0.36	1.06	0.763632	0.384697	1	0.515	FALSE	FALSE	FALSE	nuc	0	678440	0	0	2055600	0	0	11966000	669990	0	1	0	0	3	0	0	7	1
432	E3 ubiquitin-protein ligase makorin-1 (Fragment) OS=Homo sapiens OX=9606 GN=MKRN1 PE=1 SV=1	C9IZP5	MKRN1	11.305	0.31	1.59	0.819789	0.261604	1	0.475	FALSE	FALSE	FALSE	other	0	0	0	0	0	0	11812000	0	0	0	0	0	0	0	0	1	0	0
433	Max-binding protein MNT OS=Homo sapiens OX=9606 GN=MNT PE=1 SV=1	Q99583	MNT	62.299	1.26	0.587	0.0775787	0.374578	1	0.511	FALSE	FALSE	FALSE	nuc	0	1261900	0	0	0	2037800	0	0	0	0	1	0	0	0	1	0	0	0
434	DNA-3-methyladenine glycosylase (Fragment) OS=Homo sapiens OX=9606 GN=MPG PE=1 SV=1;DNA-3-methyladenine glycosylase OS=Homo sapiens OX=9606 GN=MPG PE=1 SV=3	A2IDA3	MPG	27.295	1.02	0.767	0.145722	0.258634	1	0.474	FALSE	FALSE	FALSE	nuc	0	0	0	0	0	0	1266900	2255400	0	0	0	0	0	0	0	1	1	0
435	Macrophage mannose receptor 1 OS=Homo sapiens OX=9606 GN=MRC1 PE=1 SV=1	P22897	MRC1	166.01	0.615	2	0.718584	0.259078	1	0.474	FALSE	FALSE	FALSE	other	0	0	0	0	0	0	0	0	35065000	0	0	0	0	0	0	0	0	1
436	DNA mismatch repair protein Msh6 OS=Homo sapiens OX=9606 GN=MSH6 PE=1 SV=1;DNA mismatch repair protein Msh6 OS=Homo sapiens OX=9606 GN=MSH6 PE=1 SV=2	A0A087WWJ1	MSH6	121.12	0.685	0.782	0.41014	0.349772	1	0.502	FALSE	FALSE	FALSE	nuc	0	0	0	0	0	0	0	1189000	1185200	0	0	0	0	0	0	0	1	1
437	Cytochrome c oxidase subunit 3 OS=Homo sapiens OX=9606 GN=MT-CO3 PE=1 SV=2	P00414	MT-CO3	29.95	0.974	0.396	0.221225	0.604661	1	0.598	FALSE	FALSE	FALSE	other	160390	0	627870	0	0	407280	0	0	0	1	0	1	0	0	1	0	0	0
438	Metastasis-associated protein MTA2 OS=Homo sapiens OX=9606 GN=MTA2 PE=1 SV=1	O94776	MTA2	75.022	0.929	0.894	0.314024	0.331764	1	0.497	FALSE	FALSE	FALSE	nuc	0	0	0	0	0	0	0	0	2266800	0	0	0	0	0	0	1	0	1
439	Mitochondrial carrier homolog 2 OS=Homo sapiens OX=9606 GN=MTCH2 PE=1 SV=1;Mitochondrial carrier homolog 2 (Fragment) OS=Homo sapiens OX=9606 GN=MTCH2 PE=1 SV=8	Q9Y6C9	MTCH2	33.331	-1.93	-3.98	0.248397	0.032546	1	0.167	FALSE	FALSE	FALSE	mito	26126000	54097000	46873000	10042000	7438400	10953000	11438000	3784000	2619600	3	5	3	2	1	1	2	1	1
440	C-1-tetrahydrofolate synthase, cytoplasmic OS=Homo sapiens OX=9606 GN=MTHFD1 PE=1 SV=1;C-1-tetrahydrofolate synthase, cytoplasmic OS=Homo sapiens OX=9606 GN=MTHFD1 PE=1 SV=3	F5H2F4	MTHFD1	110.61	-1.07	-1.54	0.339688	0.181078	1	0.436	FALSE	FALSE	FALSE	cyto	0	0	9968100	0	0	6214900	0	0	0	0	0	2	0	0	1	0	0	0
441	Monofunctional C1-tetrahydrofolate synthase, mitochondrial OS=Homo sapiens OX=9606 GN=MTHFD1L PE=1 SV=1;MTHFD1L protein OS=Homo sapiens OX=9606 GN=MTHFD1L PE=1 SV=1;Monofunctional C1-tetrahydrofolate synthase, mitochondrial OS=Homo sapiens OX=9606 GN=MTHFD	A0A087WVM4	MTHFD1L	99.31	0.585	0.415	0.407963	0.55274	1	0.58	FALSE	FALSE	FALSE	mito	840340	592860	1054000	495700	0	763040	0	758690	0	1	1	1	1	0	1	0	1	0
442	Metaxin-1 OS=Homo sapiens OX=9606 GN=MTX1 PE=1 SV=1;Metaxin-1 OS=Homo sapiens OX=9606 GN=MTX1 PE=1 SV=3	A0A0C4DFQ1	MTX1	47.994	-0.245	-0.719	0.849849	0.581888	1	0.59	FALSE	FALSE	FALSE	mito	9905400	2777600	2368600	0	0	892290	0	0	0	2	1	1	0	0	1	0	0	0
443	Myb-binding protein 1A (Fragment) OS=Homo sapiens OX=9606 GN=MYBBP1A PE=1 SV=1;Myb-binding protein 1A OS=Homo sapiens OX=9606 GN=MYBBP1A PE=1 SV=2	I3L1L3	MYBBP1A	140.13	-1.12	-1.32	0.046519	0.0241327	1	0.124	FALSE	FALSE	FALSE	nuc	0	1955300	2358600	0	419180	1228300	674960	2105200	879610	0	2	2	0	1	1	1	2	1
444	Myeloid-derived growth factor OS=Homo sapiens OX=9606 GN=MYDGF PE=1 SV=1;Myeloid-derived growth factor OS=Homo sapiens OX=9606 GN=MYDGF PE=1 SV=1	Q969H8	MYDGF	18.795	0.558	1.14	0.52147	0.208834	1	0.452	FALSE	FALSE	FALSE	other	0	0	0	0	1332700	0	0	3730800	2099200	0	0	0	0	1	0	0	2	1
445	Myosin-14 OS=Homo sapiens OX=9606 GN=MYH14 PE=1 SV=2;Myosin-14 (Fragment) OS=Homo sapiens OX=9606 GN=MYH14 PE=1 SV=8	Q7Z406	MYH14	227.87	1.26	2.71	0.542365	0.208317	1	0.452	FALSE	FALSE	FALSE	nuc	0	0	0	0	47354000	0	0	164030000	10358000	0	0	0	0	1	0	0	1	1
446	Myosin-9 OS=Homo sapiens OX=9606 GN=MYH9 PE=1 SV=4	P35579	MYH9	226.53	2.8	3.55	0.526545	0.426637	1	0.529	FALSE	FALSE	FALSE	other	0	309680000	18176000	0	4636900000	274470000	0	15973000000	1009000000	0	35	5	0	92	35	0	144	61
447	Myosin light chain 1/3, skeletal muscle isoform OS=Homo sapiens OX=9606 GN=MYL1 PE=2 SV=3;Myosin light chain 3 OS=Homo sapiens OX=9606 GN=MYL3 PE=1 SV=3	P05976	MYL1	21.145	0.604	1.58	0.662664	0.269636	1	0.478	FALSE	FALSE	FALSE	other	0	0	0	0	13665000	0	0	22884000	0	0	0	0	0	1	0	0	1	0
448	Myosin regulatory light chain 12A OS=Homo sapiens OX=9606 GN=MYL12A PE=1 SV=1;Myosin regulatory light chain 12A OS=Homo sapiens OX=9606 GN=MYL12A PE=1 SV=2;Myosin regulatory light chain 12B OS=Homo sapiens OX=9606 GN=MYL12B PE=1 SV=2;Myosin regulatory ligh	J3QRS3	MYL12A	20.457	1.8	3.4	0.59418	0.323813	1	0.495	FALSE	FALSE	FALSE	other	0	34365000	0	0	416530000	0	0	685370000	17267000	0	1	0	0	2	0	0	3	0
449	Myosin light polypeptide 6 OS=Homo sapiens OX=9606 GN=MYL6 PE=1 SV=1;Myosin light polypeptide 6 OS=Homo sapiens OX=9606 GN=MYL6 PE=1 SV=1;Myosin light polypeptide 6 OS=Homo sapiens OX=9606 GN=MYL6 PE=1 SV=2;Myosin light polypeptide 6 (Fragment) OS=Homo sap	F8W1R7	MYL6	16.29	3.29	3.65	0.314402	0.267801	1	0.477	FALSE	FALSE	FALSE	other	0	48335000	5555100	0	399600000	20243000	0	821680000	86483000	0	4	1	0	6	3	0	9	6
450	Myosin regulatory light polypeptide 9 OS=Homo sapiens OX=9606 GN=MYL9 PE=1 SV=4	P24844	MYL9	19.827	-0.165	0.817	0.831372	0.308652	1	0.49	FALSE	FALSE	FALSE	other	0	0	0	0	3619900	0	0	4114400	0	0	0	0	0	1	0	0	1	0
451	Unconventional myosin-XIX (Fragment) OS=Homo sapiens OX=9606 GN=MYO19 PE=1 SV=1;Unconventional myosin-XIX (Fragment) OS=Homo sapiens OX=9606 GN=MYO19 PE=1 SV=6;Unconventional myosin-XIX OS=Homo sapiens OX=9606 GN=MYO19 PE=1 SV=1;Unconventional myosin-XIX O	A0A087WZQ9	MYO19	18.191	0.582	-0.402	0.346707	0.509484	1	0.563	FALSE	FALSE	FALSE	mito	885230	1070200	0	0	0	0	0	0	0	1	1	0	0	0	0	0	0	0
452	Unconventional myosin-Ib OS=Homo sapiens OX=9606 GN=MYO1B PE=1 SV=1;Unconventional myosin-Ib OS=Homo sapiens OX=9606 GN=MYO1B PE=1 SV=3	E9PDF6	MYO1B	128.48	2.15	2.24	0.38075	0.362785	1	0.507	FALSE	FALSE	FALSE	other	0	0	0	0	31515000	0	0	144960000	0	0	0	0	0	7	0	0	15	0
453	Unconventional myosin-Ic OS=Homo sapiens OX=9606 GN=MYO1C PE=1 SV=1;Unconventional myosin-Ic OS=Homo sapiens OX=9606 GN=MYO1C PE=1 SV=4	F5H6E2	MYO1C	118.99	2.22	1.93	0.24395	0.306491	1	0.489	FALSE	FALSE	FALSE	nuc	0	0	0	0	16572000	0	0	26046000	0	0	0	0	0	7	0	0	8	0
454	Unconventional myosin-VI OS=Homo sapiens OX=9606 GN=MYO6 PE=1 SV=1;Unconventional myosin-VI OS=Homo sapiens OX=9606 GN=MYO6 PE=1 SV=1;Unconventional myosin-VI OS=Homo sapiens OX=9606 GN=MYO6 PE=1 SV=2;Unconventional myosin-VI OS=Homo sapiens OX=9606 GN=MYO	A0A0A0MRM8	MYO6	145.01	0.269	0.61	0.837634	0.644248	1	0.611	FALSE	FALSE	FALSE	nuc	0	0	0	0	922520	0	0	9838000	0	0	0	0	0	1	0	0	3	0
455	Unconventional myosin-IXa OS=Homo sapiens OX=9606 GN=MYO9A PE=1 SV=1;Unconventional myosin-IXa OS=Homo sapiens OX=9606 GN=MYO9A PE=1 SV=1;Unconventional myosin-IXa OS=Homo sapiens OX=9606 GN=MYO9A PE=1 SV=2	H3BMM1	MYO9A	150.17	1.25	2.96	0.517416	0.146993	1	0.41	FALSE	FALSE	FALSE	other	0	0	0	0	0	0	0	109610000	0	0	0	0	0	0	0	0	1	0
456	Myopalladin OS=Homo sapiens OX=9606 GN=MYPN PE=1 SV=1;Myopalladin OS=Homo sapiens OX=9606 GN=MYPN PE=1 SV=2	A0A087WX60	MYPN	112.72	0.476	-0.235	0.487515	0.729127	1	0.635	FALSE	FALSE	FALSE	nuc	0	1182500	0	0	0	0	0	0	0	0	1	0	0	0	0	0	0	0
457	Nucleus accumbens-associated protein 1 OS=Homo sapiens OX=9606 GN=NACC1 PE=1 SV=1;Nucleus accumbens-associated protein 2 OS=Homo sapiens OX=9606 GN=NACC2 PE=1 SV=1	Q96RE7	NACC1	57.258	1.3	1.18	0.168933	0.205375	1	0.45	FALSE	FALSE	FALSE	nuc	0	0	0	0	0	0	995010	0	1028100	0	0	0	0	0	0	1	0	1
458	Nucleosome assembly protein 1-like 1 (Fragment) OS=Homo sapiens OX=9606 GN=NAP1L1 PE=1 SV=1;Nucleosome assembly protein 1-like 1 (Fragment) OS=Homo sapiens OX=9606 GN=NAP1L1 PE=1 SV=1;Nucleosome assembly protein 1-like 1 (Fragment) OS=Homo sapiens OX=9606	H0YH88	NAP1L1	20.966	-2.65	-3.43	0.0772832	0.0302184	1	0.155	FALSE	FALSE	FALSE	other	17089000	18031000	7866200	0	0	0	0	0	0	2	2	1	0	0	0	0	0	0
459	Nuclear autoantigenic sperm protein OS=Homo sapiens OX=9606 GN=NASP PE=1 SV=1;Nuclear autoantigenic sperm protein OS=Homo sapiens OX=9606 GN=NASP PE=1 SV=2;Nuclear autoantigenic sperm protein (Fragment) OS=Homo sapiens OX=9606 GN=NASP PE=1 SV=1;Nuclear aut	Q5T624	NASP	45.793	0.673	2.93	0.609896	0.0484208	1	0.232	FALSE	FALSE	FALSE	nuc	0	0	0	0	0	0	3525200	15717000	10222000	0	0	0	0	0	0	4	5	4
460	RNA cytidine acetyltransferase OS=Homo sapiens OX=9606 GN=NAT10 PE=1 SV=1;RNA cytidine acetyltransferase OS=Homo sapiens OX=9606 GN=NAT10 PE=1 SV=2;RNA cytidine acetyltransferase OS=Homo sapiens OX=9606 GN=NAT10 PE=1 SV=1	A0A087WV29	NAT10	93.533	0.682	0.106	0.403019	0.894301	1	0.673	FALSE	FALSE	FALSE	nuc	2090200	0	2441800	1542600	1265600	2069100	1677300	2849400	433070	2	0	2	2	2	2	2	2	1
461	F-box only protein 50 OS=Homo sapiens OX=9606 GN=NCCRP1 PE=1 SV=1	Q6ZVX7	NCCRP1	30.847	0.803	1.17	0.409402	0.23858	1	0.466	FALSE	FALSE	FALSE	other	0	0	0	0	0	0	0	0	2478600	0	0	0	0	0	0	0	0	1
462	Nucleolin OS=Homo sapiens OX=9606 GN=NCL PE=1 SV=3;Nucleolin (Fragment) OS=Homo sapiens OX=9606 GN=NCL PE=1 SV=8	P19338	NCL	76.613	1.01	1.5	0.402245	0.223077	1	0.459	FALSE	FALSE	FALSE	nuc	0	0	0	0	0	0	0	11515000	1380200	0	0	0	0	0	0	0	4	1
463	NADH dehydrogenase [ubiquinone] iron-sulfur protein 6, mitochondrial OS=Homo sapiens OX=9606 GN=NDUFS6 PE=1 SV=1;NADH dehydrogenase [ubiquinone] iron-sulfur protein 6, mitochondrial OS=Homo sapiens OX=9606 GN=NDUFS6 PE=1 SV=1	D6RBT3	NDUFS6	18.751	-0.0767	0.553	0.928418	0.522719	1	0.569	FALSE	FALSE	FALSE	other	0	0	0	137150	0	0	0	0	0	0	0	0	1	0	0	0	0	0
464	Nebulin OS=Homo sapiens OX=9606 GN=NEB PE=1 SV=1;Nebulin OS=Homo sapiens OX=9606 GN=NEB PE=1 SV=5	A0A087X1N7	NEB	990.84	-0.719	-1.44	0.514136	0.208384	1	0.452	FALSE	FALSE	FALSE	other	0	0	9960600	0	0	0	0	0	0	0	0	1	0	0	0	0	0	0
465	Neudesin OS=Homo sapiens OX=9606 GN=NENF PE=1 SV=1	Q9UMX5	NENF	18.856	0.44	0.0713	0.308954	0.864678	1	0.667	FALSE	FALSE	FALSE	other	55122000	75400000	63829000	52245000	66213000	83687000	64742000	46575000	38456000	5	5	5	5	5	5	5	4	5
466	Merlin OS=Homo sapiens OX=9606 GN=NF2 PE=1 SV=1	P35240	NF2	69.689	0.141	-0.019	0.848814	0.979495	1	0.69	FALSE	FALSE	FALSE	other	1463900	0	0	0	0	0	0	0	0	1	0	0	0	0	0	0	0	0
467	Nuclear factor 1 A-type (Fragment) OS=Homo sapiens OX=9606 GN=NFIA PE=1 SV=1;Nuclear factor 1 X-type (Fragment) OS=Homo sapiens OX=9606 GN=NFIX PE=1 SV=1;Nuclear factor 1 X-type (Fragment) OS=Homo sapiens OX=9606 GN=NFIX PE=1 SV=1;Nuclear factor 1 X-type (	S4R308	NFIA	10.441	0.808	1.08	0.291968	0.170971	1	0.429	FALSE	FALSE	FALSE	nuc	0	0	0	0	0	0	1184200	1640800	1479800	0	0	0	0	0	0	1	1	1
52	Nuclear factor 1 OS=Homo sapiens OX=9606 GN=NFIC PE=1 SV=1;Nuclear factor 1 C-type OS=Homo sapiens OX=9606 GN=NFIC PE=1 SV=2	A0A286YEX4	NFIC	58.203	0.837	4.05	0.280849	0.000456461	1	5.11e-05	FALSE	TRUE	TRUE	nuc	0	0	0	0	0	0	6479000	6378700	7228400	0	0	0	0	0	0	2	2	2
468	Nuclear factor NF-kappa-B p100 subunit OS=Homo sapiens OX=9606 GN=NFKB2 PE=1 SV=4	Q00653	NFKB2	96.748	-1.29	-1.34	0.307884	0.290375	1	0.485	FALSE	FALSE	FALSE	cyto	5599700	7496500	2617100	0	0	923580	1393500	1776000	0	3	3	2	0	0	1	1	1	0
469	NHP2 non-histone chromosome protein 2-like 1 (S. cerevisiae), isoform CRA_b OS=Homo sapiens OX=9606 GN=SNU13 PE=1 SV=1;NHP2-like protein 1 OS=Homo sapiens OX=9606 GN=SNU13 PE=1 SV=1;NHP2-like protein 1 OS=Homo sapiens OX=9606 GN=SNU13 PE=1 SV=1;NHP2-like p	A0A3B3IRU2	NHP2L1	8.0444	0.237	0.298	0.760515	0.701953	1	0.627	FALSE	FALSE	FALSE	other	0	0	0	0	0	0	0	1373800	0	0	0	0	0	0	0	0	1	0
470	MKI67 FHA domain-interacting nucleolar phosphoprotein (Fragment) OS=Homo sapiens OX=9606 GN=NIFK PE=1 SV=1;MKI67 FHA domain-interacting nucleolar phosphoprotein OS=Homo sapiens OX=9606 GN=NIFK PE=1 SV=1	H7BZL0	NIFK	11.741	0.223	0.165	0.740441	0.806227	1	0.654	FALSE	FALSE	FALSE	nuc	0	0	0	0	0	0	0	1483300	0	0	0	0	0	0	0	0	1	0
471	NKAP-like protein OS=Homo sapiens OX=9606 GN=NKAPL PE=2 SV=3;NF-kappa-B-activating protein OS=Homo sapiens OX=9606 GN=NKAP PE=1 SV=1	Q5M9Q1	NKAPL	46.312	0.695	0.0878	0.34236	0.901749	1	0.675	FALSE	FALSE	FALSE	other	0	0	0	903550	0	0	851710	0	0	0	0	0	1	0	0	1	0	0
472	Nucleoside diphosphate kinase A OS=Homo sapiens OX=9606 GN=NME1 PE=1 SV=1	P15531	NME1	17.149	-0.542	-0.143	0.283437	0.769365	1	0.645	FALSE	FALSE	FALSE	cyto	32945000	25877000	18686000	9566900	15003000	11481000	16781000	41015000	11121000	1	1	1	1	1	1	1	1	1
473	Nucleoside diphosphate kinase OS=Homo sapiens OX=9606 GN=NME1-NME2 PE=1 SV=1;Nucleoside diphosphate kinase B OS=Homo sapiens OX=9606 GN=NME2 PE=1 SV=1;Nucleoside diphosphate kinase A OS=Homo sapiens OX=9606 GN=NME1 PE=1 SV=1;NME1-NME2 readthrough OS=Homo s	Q32Q12	NME1-NME2	32.642	1.19	1.54	0.31385	0.20097	1	0.448	FALSE	FALSE	FALSE	cyto	6113100	0	0	0	0	0	0	8193800	0	1	0	0	0	1	0	0	1	0
474	Non-POU domain-containing octamer-binding protein OS=Homo sapiens OX=9606 GN=NONO PE=1 SV=4;Non-POU domain-containing octamer-binding protein (Fragment) OS=Homo sapiens OX=9606 GN=NONO PE=1 SV=8;Non-POU domain-containing octamer-binding protein (Fragment)	Q15233	NONO	54.231	0.038	0.755	0.927261	0.0970084	1	0.349	FALSE	FALSE	FALSE	nuc	24628000	23118000	30163000	6866900	14556000	26337000	49422000	57000000	46826000	6	4	5	3	4	5	9	6	7
475	Nucleolar protein 16 OS=Homo sapiens OX=9606 GN=NOP16 PE=1 SV=1;Nucleolar protein 16 OS=Homo sapiens OX=9606 GN=NOP16 PE=1 SV=1;Nucleolar protein 16 OS=Homo sapiens OX=9606 GN=NOP16 PE=1 SV=1;Nucleolar protein 16 OS=Homo sapiens OX=9606 GN=NOP16 PE=1 SV=2	D6RIC3	NOP16	17.198	0.692	1.07	0.375574	0.18375	1	0.437	FALSE	FALSE	FALSE	nuc	0	0	0	0	0	0	0	2811000	1090200	0	0	0	0	0	0	0	1	1
476	Nucleolar protein 58 OS=Homo sapiens OX=9606 GN=NOP58 PE=1 SV=1	Q9Y2X3	NOP58	59.578	1.09	1.61	0.387194	0.21367	1	0.454	FALSE	FALSE	FALSE	nuc	0	0	0	0	3117700	11700000	0	11166000	0	0	1	0	0	1	1	0	4	0
477	Nucleophosmin OS=Homo sapiens OX=9606 GN=NPM1 PE=1 SV=2	P06748	NPM1	32.575	-3.2	1.85	0.0461206	0.211759	1	0.453	FALSE	FALSE	FALSE	nuc	6829400	58328000	16976000	1967200	21783000	0	76260000	236750000	60110000	2	6	2	1	2	0	7	7	7
478	Nucleoplasmin-3 OS=Homo sapiens OX=9606 GN=NPM3 PE=1 SV=3	O75607	NPM3	19.343	0.878	0.978	0.284095	0.236608	1	0.465	FALSE	FALSE	FALSE	other	0	0	0	0	0	0	1550500	2610700	0	0	0	0	0	0	0	1	1	0
479	Atrial natriuretic peptide receptor 3 OS=Homo sapiens OX=9606 GN=NPR3 PE=1 SV=2	P17342	NPR3	59.807	0.158	-0.406	0.767242	0.452966	1	0.539	FALSE	FALSE	FALSE	cyto	86243000	38415000	52787000	41901000	45287000	52743000	48921000	36201000	25221000	8	5	6	7	7	7	6	6	5
480	Nardilysin OS=Homo sapiens OX=9606 GN=NRDC PE=1 SV=2;Nardilysin OS=Homo sapiens OX=9606 GN=NRDC PE=1 SV=1;Nardilysin OS=Homo sapiens OX=9606 GN=NRDC PE=1 SV=1;Nardilysin OS=Homo sapiens OX=9606 GN=NRDC PE=1 SV=3;Nardilysin (Fragment) OS=Homo sapiens OX=960	F5H7V1	NRD1	108.71	-0.448	-0.869	0.569745	0.283517	1	0.483	FALSE	FALSE	FALSE	other	0	3881200	0	0	0	0	0	2552900	0	0	2	0	0	0	0	0	1	0
481	Ribosome biogenesis protein NSA2 homolog OS=Homo sapiens OX=9606 GN=NSA2 PE=1 SV=1;Ribosome biogenesis protein NSA2 homolog (Fragment) OS=Homo sapiens OX=9606 GN=NSA2 PE=1 SV=1;Ribosome biogenesis protein NSA2 homolog OS=Homo sapiens OX=9606 GN=NSA2 PE=1 S	O95478	NSA2	30.065	0.948	0.482	0.292844	0.58321	1	0.591	FALSE	FALSE	FALSE	nuc	0	1171700	0	953630	0	2223900	0	1889200	0	1	1	1	1	0	1	0	1	0
482	tRNA (cytosine(34)-C(5))-methyltransferase OS=Homo sapiens OX=9606 GN=NSUN2 PE=1 SV=2	Q08J23	NSUN2	86.47	-1.11	2.08	0.211289	0.0333771	1	0.171	FALSE	FALSE	FALSE	nuc	1050500	2575700	3072800	0	1538200	1779400	12409000	21283000	16110000	2	3	1	0	1	1	5	8	5
483	5-nucleotidase domain-containing protein 1 OS=Homo sapiens OX=9606 GN=NT5DC1 PE=1 SV=1	Q5TFE4	NT5DC1	51.844	1.34	1.54	0.299853	0.240301	1	0.467	FALSE	FALSE	FALSE	nuc	0	1532400	0	0	0	0	2460700	2922100	6104600	0	1	0	0	0	0	1	1	1
484	Cytosolic Fe-S cluster assembly factor NUBP1 OS=Homo sapiens OX=9606 GN=NUBP1 PE=1 SV=2	P53384	NUBP1	34.534	0.908	0.846	0.272744	0.304094	1	0.489	FALSE	FALSE	FALSE	cyto	0	787200	0	0	0	0	0	0	828310	0	1	0	0	0	0	0	0	1
485	Cleavage and polyadenylation specificity factor subunit 5 OS=Homo sapiens OX=9606 GN=NUDT21 PE=1 SV=1;Cleavage and polyadenylation-specificity factor subunit 5 (Fragment) OS=Homo sapiens OX=9606 GN=NUDT21 PE=1 SV=8;Cleavage and polyadenylation-specificity	O43809	NUDT21	26.227	1.29	3.87	0.408319	0.0299696	1	0.154	FALSE	FALSE	FALSE	nuc	0	0	0	0	0	0	20800000	21912000	3706500	0	0	0	0	0	0	5	3	1
486	Nuclear mitotic apparatus protein 1 OS=Homo sapiens OX=9606 GN=NUMA1 PE=1 SV=1;Nuclear mitotic apparatus protein 1 OS=Homo sapiens OX=9606 GN=NUMA1 PE=1 SV=2;Nuclear mitotic apparatus protein 1 (Fragment) OS=Homo sapiens OX=9606 GN=NUMA1 PE=1 SV=8	A0A087WY61	NUMA1	236.16	0.345	-1.86	0.739979	0.100808	1	0.355	FALSE	FALSE	FALSE	nuc	3499900	4501400	6770400	1401800	9432600	17191000	1093600	1786500	7114300	3	3	5	2	7	9	2	2	5
487	Nuclear pore complex protein Nup153 OS=Homo sapiens OX=9606 GN=NUP153 PE=1 SV=2	P49790	NUP153	153.94	0.633	1.45	0.538666	0.179756	1	0.435	FALSE	FALSE	FALSE	nuc	0	0	0	0	0	0	3049700	0	0	0	0	0	0	1	0	2	0	0
488	Nuclear pore complex protein Nup155 OS=Homo sapiens OX=9606 GN=NUP155 PE=1 SV=1;Nuclear pore complex protein Nup155 OS=Homo sapiens OX=9606 GN=NUP155 PE=1 SV=1	E9PF10	NUP155	148.09	-4.05	-2.71	0.00524916	0.0354665	1	0.18	FALSE	FALSE	FALSE	nuc	10013000	11839000	11367000	0	0	0	7932100	3857000	1185700	5	5	5	0	0	0	4	4	1
489	Nucleoporin NUP188 homolog OS=Homo sapiens OX=9606 GN=NUP188 PE=1 SV=1	Q5SRE5	NUP188	196.04	1.37	0.305	0.0377166	0.598328	1	0.596	FALSE	FALSE	FALSE	nuc	1238800	0	0	0	0	1776600	0	0	0	1	0	1	0	0	1	0	0	0
490	Nuclear pore complex protein Nup205 (Fragment) OS=Homo sapiens OX=9606 GN=NUP205 PE=1 SV=1;Nuclear pore complex protein Nup205 OS=Homo sapiens OX=9606 GN=NUP205 PE=1 SV=3	U3KPX2	NUP205	30.538	0.94	0.36	0.244792	0.64455	1	0.611	FALSE	FALSE	FALSE	other	1251200	0	0	0	0	0	0	0	0	1	0	0	0	0	0	0	0	0
491	Nuclear pore complex protein Nup214 OS=Homo sapiens OX=9606 GN=NUP214 PE=1 SV=2;Nuclear pore complex protein Nup214 OS=Homo sapiens OX=9606 GN=NUP214 PE=1 SV=1	P35658	NUP214	213.62	0.37	-1.4	0.705598	0.176243	1	0.432	FALSE	FALSE	FALSE	other	4310200	13119000	19041000	4562100	5900500	17458000	2421500	5535200	7724100	4	5	8	4	4	7	3	2	5
492	Nuclear pore complex protein Nup50 OS=Homo sapiens OX=9606 GN=NUP50 PE=1 SV=2	Q9UKX7	NUP50	50.144	0.223	0.0711	0.767766	0.92489	1	0.679	FALSE	FALSE	FALSE	nuc	123630	0	0	0	0	0	287940	244690	287730	1	0	0	0	0	0	1	1	1
493	Nuclear pore glycoprotein p62 OS=Homo sapiens OX=9606 GN=NUP62 PE=1 SV=1;Nuclear pore glycoprotein p62 OS=Homo sapiens OX=9606 GN=NUP62 PE=1 SV=3	M0QXN5	NUP62	45.615	2.15	1.42	0.42046	0.590826	1	0.593	FALSE	FALSE	FALSE	nuc	74368000	0	25923000	32570000	22857000	0	0	18339000	22629000	1	0	1	1	1	0	0	2	1
494	Nuclear pore complex protein Nup88 OS=Homo sapiens OX=9606 GN=NUP88 PE=1 SV=2;Nuclear pore complex protein Nup88 OS=Homo sapiens OX=9606 GN=NUP88 PE=1 SV=1;Nuclear pore complex protein Nup88 (Fragment) OS=Homo sapiens OX=9606 GN=NUP88 PE=1 SV=1	Q99567	NUP88	83.541	-0.539	-1.93	0.58227	0.0735442	1	0.304	FALSE	FALSE	FALSE	nuc	4508500	5758200	6183500	1700100	5877100	4691700	2117600	3218100	3889400	2	2	2	1	2	2	1	2	2
495	Nuclear pore complex protein Nup93 OS=Homo sapiens OX=9606 GN=NUP93 PE=1 SV=1;Nuclear pore complex protein Nup93 OS=Homo sapiens OX=9606 GN=NUP93 PE=1 SV=2;Nuclear pore complex protein Nup93 (Fragment) OS=Homo sapiens OX=9606 GN=NUP93 PE=1 SV=1;Nuclear por	H3BVG0	NUP93	99.554	-0.625	-1	0.484968	0.273395	1	0.479	FALSE	FALSE	FALSE	other	0	0	3072900	0	0	1388200	0	0	0	0	1	2	0	0	1	0	0	0
496	Nuclear pore complex protein Nup98-Nup96 OS=Homo sapiens OX=9606 GN=NUP98 PE=1 SV=1;Nuclear pore complex protein Nup98-Nup96 OS=Homo sapiens OX=9606 GN=NUP98 PE=1 SV=4	A0A3B3ITD8	NUP98	143.45	0.752	1.28	0.478919	0.241505	1	0.467	FALSE	FALSE	FALSE	other	1962100	1822900	2265900	1001100	2847800	2533600	3772700	0	0	1	1	2	1	2	2	2	0	0
497	Nucleolar and spindle-associated protein 1 OS=Homo sapiens OX=9606 GN=NUSAP1 PE=1 SV=1	Q9BXS6	NUSAP1	49.451	0.251	1.02	0.727473	0.179394	1	0.435	FALSE	FALSE	FALSE	nuc	0	0	0	0	0	0	2069200	0	888520	0	0	0	0	0	0	2	0	1
53	OCIA domain-containing protein 1 OS=Homo sapiens OX=9606 GN=OCIAD1 PE=1 SV=1;OCIA domain-containing protein 1 (Fragment) OS=Homo sapiens OX=9606 GN=OCIAD1 PE=1 SV=1;OCIA domain-containing protein 1 (Fragment) OS=Homo sapiens OX=9606 GN=OCIAD1 PE=1 SV=1;OCI	Q9NX40	OCIAD1	27.626	-4.27	-6.08	0.00811345	0.00103964	1	0.00048	FALSE	TRUE	TRUE	mito	46695000	69391000	34905000	5211200	714170	1468500	0	0	0	3	4	3	2	3	2	0	0	0
498	Opioid growth factor receptor, isoform CRA_d OS=Homo sapiens OX=9606 GN=OGFR PE=1 SV=1;Opioid growth factor receptor OS=Homo sapiens OX=9606 GN=OGFR PE=1 SV=3	A0A0A0MRN5	OGFR	67.194	0.521	0.652	0.546455	0.453681	1	0.539	FALSE	FALSE	FALSE	nuc	0	0	0	0	0	0	2065200	0	1840800	0	0	0	0	0	0	1	0	1
499	Olfactory receptor 52E2 OS=Homo sapiens OX=9606 GN=OR52E2 PE=3 SV=2	Q8NGJ4	OR52E2	36.63	4.17	0.321	0.182885	0.913586	1	0.677	FALSE	FALSE	FALSE	other	1683400000	0	0	1268200000	0	0	0	0	0	1	0	0	1	0	0	0	0	0
500	Protein disulfide-isomerase OS=Homo sapiens OX=9606 GN=P4HB PE=1 SV=2;Protein disulfide-isomerase OS=Homo sapiens OX=9606 GN=P4HB PE=1 SV=3;Protein disulfide-isomerase (Fragment) OS=Homo sapiens OX=9606 GN=P4HB PE=1 SV=1	H7BZ94	P4HB	52.502	0.759	-0.204	0.581149	0.880918	1	0.67	FALSE	FALSE	FALSE	other	4377900	1636800	3224300	2041500	2135300	7201200	0	3634200	2467200	2	2	1	1	2	2	0	2	1
54	Polyadenylate-binding protein OS=Homo sapiens OX=9606 GN=PABPC1 PE=1 SV=1;Polyadenylate-binding protein 1 OS=Homo sapiens OX=9606 GN=PABPC1 PE=1 SV=2;Polyadenylate-binding protein OS=Homo sapiens OX=9606 GN=PABPC1 PE=1 SV=1;Polyadenylate-binding protein OS	E7ERJ7	PABPC1	67.138	-2.53	-4.13	0.0355729	0.00318545	1	0.0061	FALSE	TRUE	TRUE	cyto	3951700	27185000	9538200	0	8235300	2102900	0	0	0	2	5	4	1	2	1	0	0	0
501	Polyadenylate-binding protein 2 OS=Homo sapiens OX=9606 GN=PABPN1 PE=1 SV=3	Q86U42	PABPN1	32.749	0.522	0.725	0.540175	0.399662	1	0.52	FALSE	FALSE	FALSE	nuc	0	0	0	0	0	0	0	4139700	0	0	0	0	0	0	0	0	1	0
502	Multifunctional protein ADE2 (Fragment) OS=Homo sapiens OX=9606 GN=PAICS PE=1 SV=1;Multifunctional protein ADE2 OS=Homo sapiens OX=9606 GN=PAICS PE=1 SV=3;Multifunctional protein ADE2 OS=Homo sapiens OX=9606 GN=PAICS PE=1 SV=1	E9PBS1	PAICS	45.651	-0.298	-1.08	0.789879	0.346758	1	0.501	FALSE	FALSE	FALSE	cyto	1685400	3484700	7883900	0	0	0	2083600	0	0	3	1	2	0	0	1	1	1	1
503	Poly [ADP-ribose] polymerase 1 OS=Homo sapiens OX=9606 GN=PARP1 PE=1 SV=4	P09874	PARP1	113.08	0.788	3.87	0.564257	0.0177655	1	0.0896	FALSE	FALSE	FALSE	nuc	0	0	0	0	0	0	4284400	24787000	18345000	0	0	0	0	0	0	3	8	8
504	PRKC apoptosis WT1 regulator protein OS=Homo sapiens OX=9606 GN=PAWR PE=1 SV=1	Q96IZ0	PAWR	36.567	0.395	0.322	0.633017	0.696923	1	0.626	FALSE	FALSE	FALSE	other	1653100	1748800	1317700	0	0	0	0	0	0	1	1	1	0	0	0	0	0	0
505	Lymphokine-activated killer T-cell-originated protein kinase (Fragment) OS=Homo sapiens OX=9606 GN=PBK PE=1 SV=2;Lymphokine-activated killer T-cell-originated protein kinase OS=Homo sapiens OX=9606 GN=PBK PE=1 SV=3	E5RFX4	PBK	17.075	0.27	1.35	0.765047	0.16075	1	0.421	FALSE	FALSE	FALSE	cyto	746810	2281900	0	0	0	0	1416300	5210400	2315400	1	1	0	0	0	0	1	2	1
506	Pyruvate carboxylase, mitochondrial OS=Homo sapiens OX=9606 GN=PC PE=1 SV=2	P11498	PC	129.63	0.278	-0.624	0.582149	0.232831	1	0.463	FALSE	FALSE	FALSE	mito	19960000000	13485000000	18658000000	14599000000	13492000000	16835000000	10549000000	9644400000	8660100000	47	46	47	47	48	47	45	45	44
507	Poly(rC)-binding protein 1 OS=Homo sapiens OX=9606 GN=PCBP1 PE=1 SV=2	Q15365	PCBP1	37.497	-0.446	0.796	0.298402	0.0817843	1	0.322	FALSE	FALSE	FALSE	nuc	128470000	162240000	117280000	49207000	39343000	64820000	170340000	324150000	257470000	8	8	8	5	4	7	8	10	8
508	Poly(rC)-binding protein 2 OS=Homo sapiens OX=9606 GN=PCBP2 PE=1 SV=1;Poly(rC)-binding protein 2 (Fragment) OS=Homo sapiens OX=9606 GN=PCBP2 PE=1 SV=1;Poly(rC)-binding protein 2 OS=Homo sapiens OX=9606 GN=PCBP2 PE=1 SV=1;Poly(rC)-binding protein 2 (Fragmen	Q15366	PCBP2	38.58	0.021	0.466	0.958754	0.269874	1	0.478	FALSE	FALSE	FALSE	nuc	69839000	98024000	70539000	44659000	80910000	66999000	81509000	157760000	116690000	4	5	5	5	5	4	5	6	6
509	Propionyl-CoA carboxylase alpha chain, mitochondrial OS=Homo sapiens OX=9606 GN=PCCA PE=1 SV=4;Propionyl-CoA carboxylase alpha chain, mitochondrial (Fragment) OS=Homo sapiens OX=9606 GN=PCCA PE=1 SV=1;Propionyl-CoA carboxylase alpha chain, mitochondrial (F	P05165	PCCA	80.058	0.174	-0.723	0.709187	0.145729	1	0.408	FALSE	FALSE	FALSE	mito	2119400000	1857900000	2281200000	1535900000	1524700000	2062900000	1110900000	985810000	958970000	28	28	26	27	27	27	28	24	25
510	Propionyl-CoA carboxylase beta chain, mitochondrial OS=Homo sapiens OX=9606 GN=PCCB PE=1 SV=1;Propionyl-CoA carboxylase beta chain, mitochondrial OS=Homo sapiens OX=9606 GN=PCCB PE=1 SV=1;Propionyl-CoA carboxylase beta chain, mitochondrial OS=Homo sapiens	E7EUY3	PCCB	55.708	-0.55	-3.99	0.800059	0.092855	1	0.342	FALSE	FALSE	FALSE	other	348410000	15461000	98780000	146010000	5733900	137480000	53647000	0	3012900	17	5	11	15	3	14	11	0	3
511	Protein-L-isoaspartate(D-aspartate) O-methyltransferase OS=Homo sapiens OX=9606 GN=PCMT1 PE=1 SV=2;Protein-L-isoaspartate(D-aspartate) O-methyltransferase OS=Homo sapiens OX=9606 GN=PCMT1 PE=1 SV=2;Protein-L-isoaspartate(D-aspartate) O-methyltransferase OS	H7C4X2	PCMT1	4.1567	0.448	0.667	0.586119	0.421967	1	0.527	FALSE	FALSE	FALSE	cyto	1461700	0	1900300	0	1566000	0	1291700	2761200	1797500	1	0	1	0	1	0	1	1	1
512	Programmed cell death protein 6 OS=Homo sapiens OX=9606 GN=PDCD6 PE=1 SV=1;HCG1985580, isoform CRA_c OS=Homo sapiens OX=9606 GN=PDCD6 PE=1 SV=1	O75340	PDCD6	21.868	-1.77	1.47	0.127674	0.19683	1	0.445	FALSE	FALSE	FALSE	cyto	6241800	2099100	6737000	2856600	0	0	4292300	15443000	5137700	2	1	2	1	0	0	1	2	1
513	Programmed cell death 6-interacting protein OS=Homo sapiens OX=9606 GN=PDCD6IP PE=1 SV=1	Q8WUM4	PDCD6IP	96.022	-1.88	-2.06	0.108379	0.0826354	1	0.323	FALSE	FALSE	FALSE	other	6971700	10970000	10552000	0	3570200	3827500	0	2787600	0	2	3	3	0	1	1	0	1	0
514	cGMP-inhibited 3,5-cyclic phosphodiesterase A OS=Homo sapiens OX=9606 GN=PDE3A PE=1 SV=3	Q14432	PDE3A	124.98	-1.1	-1.57	0.296837	0.148483	1	0.411	FALSE	FALSE	FALSE	other	2159700	9384100	1770000	0	0	0	0	0	1276800	1	2	1	0	0	0	0	0	1
515	Protein disulfide-isomerase A3 OS=Homo sapiens OX=9606 GN=PDIA3 PE=1 SV=4	P30101	PDIA3	56.782	1.78	0.0515	0.363979	0.978436	1	0.69	FALSE	FALSE	FALSE	other	7262500	4526200	14205000	4437600	2184800	20600000	2473800	8002400	5608700	3	1	3	2	2	5	1	2	2
516	Protein disulfide-isomerase A4 OS=Homo sapiens OX=9606 GN=PDIA4 PE=1 SV=2	P13667	PDIA4	72.932	1.08	0.339	0.266449	0.716825	1	0.631	FALSE	FALSE	FALSE	other	0	1328500	0	2429000	1268000	0	0	2651700	0	0	1	0	2	1	0	0	2	0
517	Peflin OS=Homo sapiens OX=9606 GN=PEF1 PE=1 SV=1	Q9UBV8	PEF1	30.381	1.19	0.672	0.176855	0.42769	1	0.529	FALSE	FALSE	FALSE	other	0	0	890240	0	0	0	937030	1557600	0	0	0	1	0	0	0	1	2	0
518	Retrotransposon-derived protein PEG10 OS=Homo sapiens OX=9606 GN=PEG10 PE=1 SV=1;HCG1642748, isoform CRA_b OS=Homo sapiens OX=9606 GN=PEG10 PE=1 SV=1;Retrotransposon-derived protein PEG10 OS=Homo sapiens OX=9606 GN=PEG10 PE=1 SV=1;Retrotransposon-derived p	A0A087WZG9	PEG10	40.471	0.585	0.575	0.441174	0.448525	1	0.537	FALSE	FALSE	FALSE	cyto	0	0	0	0	0	0	0	0	1992400	0	0	0	0	0	0	0	1	1
519	Protein pelota homolog OS=Homo sapiens OX=9606 GN=PELO PE=1 SV=2	Q9BRX2	PELO	43.359	1.09	-0.271	0.233031	0.757657	1	0.642	FALSE	FALSE	FALSE	nuc	0	0	0	0	0	374760	181400	0	0	0	0	0	0	0	1	1	0	0
520	Prefoldin subunit 2 OS=Homo sapiens OX=9606 GN=PFDN2 PE=1 SV=1	Q9UHV9	PFDN2	16.648	0.0524	-0.297	0.925323	0.597956	1	0.596	FALSE	FALSE	FALSE	cyto	1271400	1647900	0	0	0	0	0	0	0	1	1	0	0	0	0	0	0	0
521	Prefoldin subunit 5 OS=Homo sapiens OX=9606 GN=PFDN5 PE=1 SV=1;Prefoldin subunit 5 (Fragment) OS=Homo sapiens OX=9606 GN=PFDN5 PE=1 SV=1;Prefoldin subunit 5 OS=Homo sapiens OX=9606 GN=PFDN5 PE=1 SV=2	H3BMQ1	PFDN5	9.5351	0.287	0.295	0.574919	0.565171	1	0.585	FALSE	FALSE	FALSE	cyto	0	0	0	0	0	0	0	1294000	0	0	0	0	0	0	0	0	1	0
522	Profilin-1 OS=Homo sapiens OX=9606 GN=PFN1 PE=1 SV=2;Profilin OS=Homo sapiens OX=9606 GN=PFN1 PE=1 SV=1	P07737	PFN1	15.054	-0.136	-1.91	0.916679	0.167334	1	0.426	FALSE	FALSE	FALSE	cyto	9394200	18851000	27899000	6258600	16388000	11422000	2755200	14194000	9496000	3	3	3	2	3	2	1	2	2
523	Phosphoglycerate mutase 2 OS=Homo sapiens OX=9606 GN=PGAM2 PE=1 SV=3;Probable phosphoglycerate mutase 4 OS=Homo sapiens OX=9606 GN=PGAM4 PE=3 SV=1;Phosphoglycerate mutase 1 OS=Homo sapiens OX=9606 GN=PGAM1 PE=1 SV=2	P15259	PGAM2	28.766	0.213	0.79	0.778298	0.311438	1	0.491	FALSE	FALSE	FALSE	nuc	0	0	0	0	0	0	0	5041400	0	0	0	0	0	0	0	0	1	0
524	Serine/threonine-protein phosphatase PGAM5, mitochondrial OS=Homo sapiens OX=9606 GN=PGAM5 PE=1 SV=2	Q96HS1	PGAM5	32.004	0.317	-0.363	0.770675	0.738725	1	0.637	FALSE	FALSE	FALSE	mito	3097600	3876900	0	0	0	0	0	0	0	1	1	1	0	1	0	0	0	0
525	Membrane-associated progesterone receptor component 1 OS=Homo sapiens OX=9606 GN=PGRMC1 PE=1 SV=3	O00264	PGRMC1	21.671	0.481	-0.53	0.765769	0.742987	1	0.638	FALSE	FALSE	FALSE	other	26373000	21939000	16425000	10730000	11269000	21191000	11181000	8189400	5237700	2	2	1	1	1	2	2	1	1
526	Prohibitin OS=Homo sapiens OX=9606 GN=PHB PE=1 SV=1;Prohibitin (Fragment) OS=Homo sapiens OX=9606 GN=PHB PE=1 SV=1;Prohibitin (Fragment) OS=Homo sapiens OX=9606 GN=PHB PE=1 SV=2;Prohibitin (Fragment) OS=Homo sapiens OX=9606 GN=PHB PE=1 SV=2;Prohibitin (Fra	P35232	PHB	29.804	-0.0219	-0.333	0.961895	0.473581	1	0.548	FALSE	FALSE	FALSE	mito	17928000	9435100	20358000	5386900	4816400	10542000	6305400	9061700	4628200	5	3	5	2	3	3	3	3	2
527	Prohibitin-2 OS=Homo sapiens OX=9606 GN=PHB2 PE=1 SV=1;Prohibitin-2 OS=Homo sapiens OX=9606 GN=PHB2 PE=1 SV=2;Prohibitin-2 OS=Homo sapiens OX=9606 GN=PHB2 PE=1 SV=2;Prohibitin-2 (Fragment) OS=Homo sapiens OX=9606 GN=PHB2 PE=1 SV=1;Prohibitin-2 (Fragment) O	F5GY37	PHB2	29.723	0.0829	-0.199	0.846819	0.644937	1	0.611	FALSE	FALSE	FALSE	mito	46572000	23511000	44712000	23292000	29381000	32792000	21128000	27891000	21073000	7	3	5	5	7	5	4	5	5
528	Lysine-specific demethylase PHF2 OS=Homo sapiens OX=9606 GN=PHF2 PE=1 SV=3;Lysine-specific demethylase PHF2 OS=Homo sapiens OX=9606 GN=PHF2 PE=1 SV=1;Histone lysine demethylase PHF8 (Fragment) OS=Homo sapiens OX=9606 GN=PHF8 PE=1 SV=1;Histone lysine demeth	E7ET14	PHF2	33.166	0.783	0.553	0.380577	0.530788	1	0.572	FALSE	FALSE	FALSE	nuc	0	0	1798100	0	0	1192500	0	0	964430	0	0	1	0	0	1	0	0	1
529	PHD finger protein 3 OS=Homo sapiens OX=9606 GN=PHF3 PE=1 SV=1;PHD finger protein 3 (Fragment) OS=Homo sapiens OX=9606 GN=PHF3 PE=1 SV=1;PHD finger protein 3 (Fragment) OS=Homo sapiens OX=9606 GN=PHF3 PE=1 SV=1;PHD finger protein 3 (Fragment) OS=Homo sapie	D6R9X2	PHF3	81.964	0.649	0.214	0.323236	0.738041	1	0.637	FALSE	FALSE	FALSE	nuc	0	381300	0	0	0	0	837250	1017900	0	0	1	0	0	0	0	1	1	0
530	PHD finger-like domain-containing protein 5A OS=Homo sapiens OX=9606 GN=PHF5A PE=1 SV=1	Q7RTV0	PHF5A	12.405	0.882	1.1	0.273332	0.179113	1	0.434	FALSE	FALSE	FALSE	nuc	0	0	0	0	0	0	0	0	1318700	0	0	0	0	0	0	0	0	1
531	PHD finger protein 6, isoform CRA_d OS=Homo sapiens OX=9606 GN=PHF6 PE=1 SV=1;PHD finger protein 6 OS=Homo sapiens OX=9606 GN=PHF6 PE=1 SV=1;PHD finger protein 6 OS=Homo sapiens OX=9606 GN=PHF6 PE=1 SV=1	Q5JRC6	PHF6	36.43	0.836	0.688	0.202252	0.286007	1	0.483	FALSE	FALSE	FALSE	nuc	0	0	0	0	0	0	264140	713020	506260	0	0	0	0	0	0	1	1	1
532	D-3-phosphoglycerate dehydrogenase OS=Homo sapiens OX=9606 GN=PHGDH PE=1 SV=1;D-3-phosphoglycerate dehydrogenase OS=Homo sapiens OX=9606 GN=PHGDH PE=1 SV=1;D-3-phosphoglycerate dehydrogenase OS=Homo sapiens OX=9606 GN=PHGDH PE=1 SV=4;D-3-phosphoglycerate d	A0A286YF22	PHGDH	55.938	1.12	0.565	0.536887	0.754105	1	0.641	FALSE	FALSE	FALSE	cyto	7339600	2066300	6765500	0	1665000	12319000	3458700	0	1962900	3	1	5	0	1	4	2	1	1
533	Pyruvate kinase PKM OS=Homo sapiens OX=9606 GN=PKM PE=1 SV=4;Pyruvate kinase (Fragment) OS=Homo sapiens OX=9606 GN=PKM PE=1 SV=1;Pyruvate kinase OS=Homo sapiens OX=9606 GN=PKM PE=1 SV=1;Pyruvate kinase OS=Homo sapiens OX=9606 GN=PKM PE=1 SV=1;Pyruvate kina	P14618	PKM	57.936	-0.797	0.0563	0.303097	0.939998	1	0.682	FALSE	FALSE	FALSE	cyto	6040500	20355000	13526000	1032800	13544000	9239800	3956600	22686000	3710600	3	5	4	1	6	3	3	5	2
534	1-phosphatidylinositol 4,5-bisphosphate phosphodiesterase beta-4 OS=Homo sapiens OX=9606 GN=PLCB4 PE=1 SV=3	Q15147	PLCB4	134.46	1.84	0.185	0.149106	0.876792	1	0.669	FALSE	FALSE	FALSE	other	0	0	2348900	1534500	0	12754000	0	0	0	0	0	1	1	0	2	1	0	0
535	Phosphoinositide phospholipase C (Fragment) OS=Homo sapiens OX=9606 GN=PLCL2 PE=1 SV=1;Phosphoinositide phospholipase C (Fragment) OS=Homo sapiens OX=9606 GN=PLCL1 PE=1 SV=1;Phosphoinositide phospholipase C OS=Homo sapiens OX=9606 GN=PLCL1 PE=1 SV=1;Inacti	H7C276	PLCL2	79.806	0.499	2.98	0.773228	0.112264	1	0.372	FALSE	FALSE	FALSE	other	0	42861000	71751000	48379000	37247000	62377000	38193000	34915000	62836000	0	1	1	1	1	1	1	1	1
536	Plectin OS=Homo sapiens OX=9606 GN=PLEC PE=1 SV=3;Plectin (Fragment) OS=Homo sapiens OX=9606 GN=PLEC PE=1 SV=1;Plectin OS=Homo sapiens OX=9606 GN=PLEC PE=1 SV=9	Q15149	PLEC	531.78	0.512	0.0478	0.421272	0.938903	1	0.682	FALSE	FALSE	FALSE	cyto	0	0	2061900	0	892500	0	0	0	0	0	0	2	0	2	0	0	0	0
537	Plastin-3 OS=Homo sapiens OX=9606 GN=PLS3 PE=1 SV=1;Plastin-3 OS=Homo sapiens OX=9606 GN=PLS3 PE=1 SV=4;Plastin-3 (Fragment) OS=Homo sapiens OX=9606 GN=PLS3 PE=1 SV=1;Plastin-2 (Fragment) OS=Homo sapiens OX=9606 GN=LCP1 PE=1 SV=1;Plastin-2 OS=Homo sapiens	A0A0A0MSQ0	PLS3	69.334	0.856	0.211	0.228901	0.757107	1	0.642	FALSE	FALSE	FALSE	cyto	0	1678000	982910	0	0	0	0	977800	803720	0	2	1	0	0	0	0	1	1
538	Protein POF1B OS=Homo sapiens OX=9606 GN=POF1B PE=1 SV=3	Q8WVV4	POF1B	68.064	0.591	1.03	0.580168	0.34338	1	0.5	FALSE	FALSE	FALSE	other	0	0	0	0	0	0	0	0	4165800	0	0	0	0	0	0	0	0	1
539	DNA-directed RNA polymerase I subunit RPA49 OS=Homo sapiens OX=9606 GN=POLR1E PE=1 SV=3	Q9GZS1	POLR1E	47.26	1.29	0.131	0.187074	0.887277	1	0.672	FALSE	FALSE	FALSE	nuc	0	0	0	0	0	0	243900	0	0	0	0	0	0	0	0	1	0	0
540	DNA-directed RNA polymerase subunit beta OS=Homo sapiens OX=9606 GN=POLR2B PE=1 SV=3;DNA-directed RNA polymerase subunit beta OS=Homo sapiens OX=9606 GN=POLR2B PE=1 SV=1;DNA-directed RNA polymerase subunit beta OS=Homo sapiens OX=9606 GN=POLR2B PE=1 SV=2;D	C9J4M6	POLR2B	121.37	0.489	-0.145	0.51619	0.84544	1	0.663	FALSE	FALSE	FALSE	nuc	0	434270	0	0	0	0	0	0	0	0	1	0	0	0	0	0	0	0
541	Nuclear envelope pore membrane protein POM 121C OS=Homo sapiens OX=9606 GN=POM121C PE=1 SV=3;Nuclear envelope pore membrane protein POM 121 OS=Homo sapiens OX=9606 GN=POM121 PE=1 SV=2	A8CG34	POM121C	125.09	0.0399	-0.0505	0.957741	0.946579	1	0.684	FALSE	FALSE	FALSE	nuc	0	0	0	0	0	267200	0	361950	0	0	0	0	0	0	1	0	1	0
542	NADPH--cytochrome P450 reductase OS=Homo sapiens OX=9606 GN=POR PE=1 SV=1;NADPH--cytochrome P450 reductase (Fragment) OS=Homo sapiens OX=9606 GN=POR PE=1 SV=1;NADPH--cytochrome P450 reductase OS=Homo sapiens OX=9606 GN=POR PE=1 SV=2	E7EMD0	POR	47.401	-0.705	-1.4	0.379462	0.10129	1	0.356	FALSE	FALSE	FALSE	nuc	0	0	2872800	0	0	0	0	0	0	0	0	1	0	0	0	0	0	0
543	Peptidyl-prolyl cis-trans isomerase A OS=Homo sapiens OX=9606 GN=PPIA PE=1 SV=2;Peptidyl-prolyl cis-trans isomerase OS=Homo sapiens OX=9606 GN=PPIA PE=1 SV=1;Peptidyl-prolyl cis-trans isomerase OS=Homo sapiens OX=9606 GN=PPIA PE=1 SV=1	P62937	PPIA	18.012	1.61	-0.00715	0.166676	0.994786	1	0.693	FALSE	FALSE	FALSE	other	0	0	0	0	0	10957000	0	15939000	3424700	1	0	0	0	0	2	0	4	1
544	Peptidyl-prolyl cis-trans isomerase-like 1 OS=Homo sapiens OX=9606 GN=PPIL1 PE=1 SV=1	Q9Y3C6	PPIL1	18.237	0.356	0.587	0.570531	0.357634	1	0.505	FALSE	FALSE	FALSE	nuc	0	0	0	0	0	0	0	1660500	0	0	0	0	0	0	0	0	1	0
545	Protein phosphatase 1G OS=Homo sapiens OX=9606 GN=PPM1G PE=1 SV=1	O15355	PPM1G	59.271	1.15	1.68	0.334447	0.170482	1	0.428	FALSE	FALSE	FALSE	nuc	0	0	0	0	0	0	0	10450000	4563200	0	0	0	0	0	0	0	2	1
546	Protein phosphatase methylesterase 1 OS=Homo sapiens OX=9606 GN=PPME1 PE=1 SV=3	Q9Y570	PPME1	42.315	0.594	3.05	0.635623	0.0346815	1	0.177	FALSE	FALSE	FALSE	nuc	1421200	0	0	0	0	0	10684000	7338200	13191000	1	0	1	0	0	0	4	3	3
547	Protein phosphatase 1 regulatory subunit 12A OS=Homo sapiens OX=9606 GN=PPP1R12A PE=1 SV=1;Protein phosphatase 1 regulatory subunit 12A (Fragment) OS=Homo sapiens OX=9606 GN=PPP1R12A PE=1 SV=1;Protein phosphatase 1 regulatory subunit 12A (Fragment) OS=Homo	O14974	PPP1R12A	115.28	0.581	0.138	0.47526	0.863655	1	0.667	FALSE	FALSE	FALSE	cyto	0	329530	13415000	0	0	0	0	0	0	0	1	1	0	0	0	0	0	0
548	Serine/threonine-protein phosphatase 2A 65 kDa regulatory subunit A alpha isoform OS=Homo sapiens OX=9606 GN=PPP2R1A PE=1 SV=4;Serine/threonine-protein phosphatase 2A 65 kDa regulatory subunit A alpha isoform (Fragment) OS=Homo sapiens OX=9606 GN=PPP2R1A P	P30153	PPP2R1A	65.308	0.0161	-0.737	0.979161	0.251714	1	0.471	FALSE	FALSE	FALSE	cyto	3065800	2074900	3778800	0	0	3555500	0	2193700	0	1	1	1	0	0	1	1	2	0
549	Peroxiredoxin-1 OS=Homo sapiens OX=9606 GN=PRDX1 PE=1 SV=1;Peroxiredoxin-1 (Fragment) OS=Homo sapiens OX=9606 GN=PRDX1 PE=1 SV=1	Q06830	PRDX1	22.11	-0.223	0.128	0.627481	0.779262	1	0.647	FALSE	FALSE	FALSE	mito	62819000	147910000	99051000	31010000	107450000	56571000	53216000	212140000	83920000	6	7	3	3	7	4	4	8	5
550	Peroxiredoxin-2 OS=Homo sapiens OX=9606 GN=PRDX2 PE=1 SV=5;Peroxiredoxin 2, isoform CRA_a OS=Homo sapiens OX=9606 GN=PRDX2 PE=1 SV=2	P32119	PRDX2	21.892	-1.25	-1.39	0.0832967	0.0580179	1	0.263	FALSE	FALSE	FALSE	other	0	2515300	0	0	0	0	0	0	0	0	1	0	0	0	0	0	1	0
551	Peroxiredoxin-4 OS=Homo sapiens OX=9606 GN=PRDX4 PE=1 SV=1;Peroxiredoxin-4 OS=Homo sapiens OX=9606 GN=PRDX4 PE=1 SV=1	Q13162	PRDX4	30.54	-0.951	-2.83	0.520613	0.0794363	1	0.317	FALSE	FALSE	FALSE	other	3739000	29902000	18696000	1957100	17309000	6403500	12274000	5796900	2403000	2	3	2	1	2	2	2	1	1
552	Peroxiredoxin-5, mitochondrial OS=Homo sapiens OX=9606 GN=PRDX5 PE=1 SV=4	P30044	PRDX5	22.086	0.715	1.48	0.547092	0.228608	1	0.462	FALSE	FALSE	FALSE	mito	0	2881500	3142300	1640900	2613700	0	2151000	12527000	5943500	0	1	1	1	1	0	1	2	2
553	Peroxiredoxin-6 OS=Homo sapiens OX=9606 GN=PRDX6 PE=1 SV=3	P30041	PRDX6	25.035	1.36	3.49	0.391438	0.0481275	1	0.231	FALSE	FALSE	FALSE	cyto	5349000	30732000	4502700	2631900	10056000	10186000	13182000	47588000	38486000	1	4	1	1	2	3	2	7	6
554	Glucosidase 2 subunit beta OS=Homo sapiens OX=9606 GN=PRKCSH PE=1 SV=1;Glucosidase 2 subunit beta OS=Homo sapiens OX=9606 GN=PRKCSH PE=1 SV=2;Glucosidase 2 subunit beta (Fragment) OS=Homo sapiens OX=9606 GN=PRKCSH PE=1 SV=1	K7ELL7	PRKCSH	60.192	0.645	0.665	0.460187	0.446932	1	0.536	FALSE	FALSE	FALSE	other	0	0	0	0	0	0	0	3962400	0	0	0	0	0	0	0	0	2	0
555	DNA-dependent protein kinase catalytic subunit OS=Homo sapiens OX=9606 GN=PRKDC PE=1 SV=3	P78527	PRKDC	469.08	-1.03	1.51	0.319871	0.157051	1	0.418	FALSE	FALSE	FALSE	nuc	12582000	3229700	11749000	1693700	2701600	21015000	24512000	33547000	32784000	3	2	7	2	2	6	13	13	13
55	Protein arginine N-methyltransferase 1 OS=Homo sapiens OX=9606 GN=PRMT1 PE=1 SV=1;Protein arginine N-methyltransferase 1 OS=Homo sapiens OX=9606 GN=PRMT1 PE=1 SV=3;Protein arginine N-methyltransferase 1 (Fragment) OS=Homo sapiens OX=9606 GN=PRMT1 PE=1 SV=1	E9PKG1	PRMT1	37.709	0.819	4.74	0.182187	2.41584e-05	1	1.29e-10	FALSE	TRUE	TRUE	nuc	0	0	0	0	0	0	11904000	16545000	8183500	0	0	0	0	0	0	5	3	4
556	Pre-mRNA-processing factor 40 homolog A OS=Homo sapiens OX=9606 GN=PRPF40A PE=1 SV=1;Pre-mRNA-processing factor 40 homolog A OS=Homo sapiens OX=9606 GN=PRPF40A PE=1 SV=2;Pre-mRNA-processing factor 40 homolog A (Fragment) OS=Homo sapiens OX=9606 GN=PRPF40A	A0A3F2YNY6	PRPF40A	112.4	-0.0118	-0.696	0.988348	0.398151	1	0.519	FALSE	FALSE	FALSE	nuc	2342000	0	0	0	0	0	0	0	0	2	0	0	0	0	0	1	0	0
557	Protein PRRC2C OS=Homo sapiens OX=9606 GN=PRRC2C PE=1 SV=1;Protein PRRC2C OS=Homo sapiens OX=9606 GN=PRRC2C PE=1 SV=4	E7EPN9	PRRC2C	308.77	0.521	0.532	0.532343	0.524293	1	0.569	FALSE	FALSE	FALSE	cyto	338710	0	224230	0	288240	0	0	0	0	1	0	2	0	1	0	0	0	0
558	Proteasome activator complex subunit 1 (Fragment) OS=Homo sapiens OX=9606 GN=PSME1 PE=1 SV=1;Proteasome activator complex subunit 1 OS=Homo sapiens OX=9606 GN=PSME1 PE=1 SV=1;Proteasome activator complex subunit 1 OS=Homo sapiens OX=9606 GN=PSME1 PE=1 SV=1	H0YLU2	PSME1	12.883	0.945	0.424	0.196829	0.545721	1	0.577	FALSE	FALSE	FALSE	cyto	463220	716820	0	0	594020	0	0	1564000	0	1	1	1	0	1	0	0	2	0
56	Proteasome activator complex subunit 3 OS=Homo sapiens OX=9606 GN=PSME3 PE=1 SV=1;Proteasome activator complex subunit 3 OS=Homo sapiens OX=9606 GN=PSME3 PE=1 SV=1;Proteasome activator complex subunit 3 (Fragment) OS=Homo sapiens OX=9606 GN=PSME3 PE=1 SV=1	K9J957	PSME3	26.867	0.73	5.82	0.259082	8.49539e-06	1	7.59e-14	FALSE	TRUE	TRUE	nuc	0	0	0	0	0	0	12862000	22721000	29401000	0	0	0	0	0	0	3	4	6
57	Polypyrimidine tract binding protein 1, isoform CRA_b OS=Homo sapiens OX=9606 GN=PTBP1 PE=1 SV=4;Polypyrimidine tract-binding protein 1 OS=Homo sapiens OX=9606 GN=PTBP1 PE=1 SV=1;Polypyrimidine tract-binding protein 1 OS=Homo sapiens OX=9606 GN=PTBP1 PE=1	A6NLN1	PTBP1	56.51	1.16	7.58	0.127305	2.95083e-06	1	1.11e-14	FALSE	TRUE	TRUE	nuc	1920600	0	2690900	0	0	2201800	52994000	167880000	75231000	1	1	1	0	0	1	10	10	9
559	Prostaglandin G/H synthase 2 OS=Homo sapiens OX=9606 GN=PTGS2 PE=1 SV=2	P35354	PTGS2	68.995	0.157	-0.774	0.774496	0.181051	1	0.436	FALSE	FALSE	FALSE	other	122140000	110310000	124120000	105410000	103170000	155300000	58472000	26730000	50598000	12	10	12	13	11	11	8	3	8
560	Prothymosin alpha OS=Homo sapiens OX=9606 GN=PTMA PE=1 SV=1;Prothymosin alpha OS=Homo sapiens OX=9606 GN=PTMA PE=1 SV=1;Prothymosin alpha OS=Homo sapiens OX=9606 GN=PTMA PE=1 SV=1;Prothymosin alpha (Fragment) OS=Homo sapiens OX=9606 GN=PTMA PE=1 SV=1;Proth	B8ZZQ6	PTMA	11.758	0.556	0.924	0.53208	0.309584	1	0.49	FALSE	FALSE	FALSE	nuc	0	0	0	0	0	0	0	4329200	0	0	0	0	0	0	0	0	1	0
561	Tyrosine-protein phosphatase non-receptor type 1 OS=Homo sapiens OX=9606 GN=PTPN1 PE=1 SV=1;Tyrosine-protein phosphatase non-receptor type OS=Homo sapiens OX=9606 GN=PTPN1 PE=1 SV=1	P18031	PTPN1	49.966	-2.02	-2.81	0.0740374	0.0208448	1	0.106	FALSE	FALSE	FALSE	other	5181300	13406000	11228000	0	0	3110700	780450	1953000	1148100	3	4	6	1	0	2	1	2	1
562	Peptidyl-tRNA hydrolase 2, mitochondrial OS=Homo sapiens OX=9606 GN=PTRH2 PE=1 SV=1;Peptidyl-tRNA hydrolase 2, mitochondrial OS=Homo sapiens OX=9606 GN=PTRH2 PE=1 SV=1	J3KQ48	PTRH2	19.325	1.15	-0.000556	0.123748	0.999361	1	0.693	FALSE	FALSE	FALSE	mito	2662100	2280600	2198300	703490	808870	1333600	0	0	0	1	1	1	1	1	1	0	0	0
563	Poly(U)-binding-splicing factor PUF60 (Fragment) OS=Homo sapiens OX=9606 GN=PUF60 PE=1 SV=1;Poly(U)-binding-splicing factor PUF60 (Fragment) OS=Homo sapiens OX=9606 GN=PUF60 PE=1 SV=3;Poly(U)-binding-splicing factor PUF60 (Fragment) OS=Homo sapiens OX=9606	E9PN18	PUF60	28.743	0.725	0.0897	0.412792	0.917548	1	0.678	FALSE	FALSE	FALSE	nuc	0	0	0	2023300	0	0	0	0	0	0	0	0	1	0	0	1	0	0
564	Peroxidasin homolog OS=Homo sapiens OX=9606 GN=PXDN PE=1 SV=2;Peroxidasin homolog (Fragment) OS=Homo sapiens OX=9606 GN=PXDN PE=1 SV=1;Peroxidasin homolog (Fragment) OS=Homo sapiens OX=9606 GN=PXDN PE=1 SV=1	Q92626	PXDN	165.27	0.451	0.735	0.559202	0.34905	1	0.502	FALSE	FALSE	FALSE	other	0	0	2212700	0	0	0	0	0	1387900	0	0	2	0	0	0	0	0	1
565	Glutamine-rich protein 1 OS=Homo sapiens OX=9606 GN=QRICH1 PE=1 SV=1	Q2TAL8	QRICH1	86.435	0.709	1.33	0.370033	0.111884	1	0.371	FALSE	FALSE	FALSE	nuc	0	0	0	0	0	0	0	0	1853800	0	0	0	0	0	0	0	0	1
566	Ras-related protein Rab-14 (Fragment) OS=Homo sapiens OX=9606 GN=RAB14 PE=1 SV=1;Ras-related protein Rab-14 OS=Homo sapiens OX=9606 GN=RAB14 PE=1 SV=4	X6RFL8	RAB14	20.409	0.0243	-0.493	0.978736	0.591501	1	0.594	FALSE	FALSE	FALSE	other	3126100	0	0	0	0	0	0	0	0	2	0	0	0	0	0	0	0	0
567	Ras-related protein Rab-18 OS=Homo sapiens OX=9606 GN=RAB18 PE=1 SV=1	Q9NP72	RAB18	22.977	0.47	-0.0845	0.577652	0.919495	1	0.678	FALSE	FALSE	FALSE	other	1496800	0	0	0	0	0	0	0	0	1	0	0	0	0	0	0	0	0
568	Ras-related protein Rab-1A OS=Homo sapiens OX=9606 GN=RAB1A PE=1 SV=3;Ras-related protein Rab-1A OS=Homo sapiens OX=9606 GN=RAB1A PE=1 SV=1	P62820	RAB1A	22.677	-3.27	-3.51	0.0620051	0.0483058	1	0.232	FALSE	FALSE	FALSE	cyto	31269000	0	18546000	1464200	0	1290000	1690500	0	0	2	0	2	1	0	1	1	0	0
569	Ras-related protein Rab-1B OS=Homo sapiens OX=9606 GN=RAB1B PE=1 SV=1;Ras-related protein Rab-1B OS=Homo sapiens OX=9606 GN=RAB1B PE=1 SV=1	Q9H0U4	RAB1B	22.171	-0.245	-0.526	0.834456	0.654936	1	0.614	FALSE	FALSE	FALSE	other	6443700	1485900	2487800	0	0	0	1866600	0	0	1	1	2	0	0	0	1	0	0
570	Ras-related protein Rab-21 OS=Homo sapiens OX=9606 GN=RAB21 PE=1 SV=3	Q9UL25	RAB21	24.347	-0.52	-1.64	0.710774	0.25967	1	0.474	FALSE	FALSE	FALSE	other	5602700	0	5843000	3863100	0	4623700	0	0	0	3	1	3	2	0	2	2	0	0
571	Ras-related protein Rab-2A OS=Homo sapiens OX=9606 GN=RAB2A PE=1 SV=1;Ras-related protein Rab-2A OS=Homo sapiens OX=9606 GN=RAB2A PE=1 SV=1;Ras-related protein Rab-2B OS=Homo sapiens OX=9606 GN=RAB2B PE=1 SV=1;Ras-related protein Rab-2B OS=Homo sapiens OX=	P61019	RAB2A	23.545	0.0664	-0.317	0.961812	0.819448	1	0.657	FALSE	FALSE	FALSE	other	8423700	0	0	2725500	0	0	1719300	0	0	3	0	1	2	0	0	1	0	0
572	Ras-related protein Rab-32 OS=Homo sapiens OX=9606 GN=RAB32 PE=1 SV=3	Q13637	RAB32	24.997	1.04	1.03	0.239793	0.244579	1	0.468	FALSE	FALSE	FALSE	cyto	0	1285200	0	0	0	0	1689300	0	0	0	1	0	0	0	0	1	0	0
573	Ras-related protein Rab-34, isoform NARR (Fragment) OS=Homo sapiens OX=9606 GN=RAB34 PE=1 SV=1;Ras-related protein Rab-34, isoform NARR (Fragment) OS=Homo sapiens OX=9606 GN=RAB34 PE=1 SV=8;Ras-related GTP-binding protein RAB39 OS=Homo sapiens OX=9606 GN=R	J3QLC6	RAB34	17.372	0.0481	-0.164	0.951222	0.834651	1	0.66	FALSE	FALSE	FALSE	other	911170	1033200	0	0	0	0	0	0	0	1	1	0	0	0	0	0	0	0
574	Ras-related protein Rab-5B OS=Homo sapiens OX=9606 GN=RAB5B PE=1 SV=1	P61020	RAB5B	23.707	0.575	1.09	0.556091	0.276936	1	0.48	FALSE	FALSE	FALSE	other	4371200	0	0	0	1909500	0	2733200	0	0	1	0	0	0	0	1	0	0	0
575	Ras-related protein Rab-5C OS=Homo sapiens OX=9606 GN=RAB5C PE=1 SV=2;Uncharacterized protein (Fragment) OS=Homo sapiens OX=9606 PE=4 SV=1;Ras-related protein Rab-5C (Fragment) OS=Homo sapiens OX=9606 GN=RAB5C PE=1 SV=8;Ras-related protein Rab-5B (Fragment	P51148	RAB5C	23.482	1.06	1.03	0.251948	0.263883	1	0.476	FALSE	FALSE	FALSE	other	8123300	3962000	5783400	0	0	0	0	3369000	0	1	1	1	0	0	1	1	1	0
576	Ras-related protein Rab-6A OS=Homo sapiens OX=9606 GN=RAB6A PE=1 SV=3;Ras-related protein Rab-6B (Fragment) OS=Homo sapiens OX=9606 GN=RAB6B PE=1 SV=3;Ras-related protein Rab-6B (Fragment) OS=Homo sapiens OX=9606 GN=RAB6B PE=1 SV=1;Ras-related protein Rab-	P20340	RAB6A	23.593	1.75	-1.18	0.340037	0.514455	1	0.565	FALSE	FALSE	FALSE	other	18439000	7031700	12086000	8962400	4640400	8647900	7416300	0	5658700	3	1	1	2	1	2	1	0	1
577	Ras-related protein Rab-7a (Fragment) OS=Homo sapiens OX=9606 GN=RAB7A PE=1 SV=1;Ras-related protein Rab-7a OS=Homo sapiens OX=9606 GN=RAB7A PE=1 SV=1;Ras-related protein Rab-7a OS=Homo sapiens OX=9606 GN=RAB7A PE=1 SV=1;Ras-related protein Rab-7a OS=Homo	C9J592	RAB7A	17.037	0.189	0.651	0.815405	0.430656	1	0.53	FALSE	FALSE	FALSE	other	2793400	0	2934000	860820	3231400	0	0	2081500	0	1	1	1	1	1	0	0	1	0
578	Ras-related protein Rab-8A OS=Homo sapiens OX=9606 GN=RAB8A PE=1 SV=1	P61006	RAB8A	23.668	-0.579	-0.61	0.673502	0.657365	1	0.615	FALSE	FALSE	FALSE	nuc	6962800	0	3108400	3838200	0	2072000	2861800	0	0	3	0	2	4	0	1	3	0	0
579	Rab GTPase-activating protein 1-like (Fragment) OS=Homo sapiens OX=9606 GN=RABGAP1L PE=1 SV=1;Rab GTPase-activating protein 1-like OS=Homo sapiens OX=9606 GN=RABGAP1L PE=1 SV=1;Rab GTPase-activating protein 1-like, isoform 10 OS=Homo sapiens OX=9606 GN=RAB	E9PS63	RABGAP1L	22.512	0.631	1.64	0.465828	0.0808691	1	0.32	FALSE	FALSE	FALSE	other	0	4098200	0	0	4063800	0	0	9351900	3644000	0	1	0	0	1	0	0	1	1
580	GTP-binding nuclear protein Ran OS=Homo sapiens OX=9606 GN=RAN PE=1 SV=1;GTP-binding nuclear protein Ran OS=Homo sapiens OX=9606 GN=RAN PE=1 SV=3;GTP-binding nuclear protein Ran (Fragment) OS=Homo sapiens OX=9606 GN=RAN PE=1 SV=1;GTP-binding nuclear protei	B5MDF5	RAN	26.224	0.267	0.0818	0.609079	0.874663	1	0.669	FALSE	FALSE	FALSE	nuc	101390000	59807000	127600000	57789000	61456000	115920000	79147000	87107000	87668000	7	6	6	6	6	6	6	7	6
58	E3 SUMO-protein ligase RanBP2 OS=Homo sapiens OX=9606 GN=RANBP2 PE=1 SV=2	P49792	RANBP2	358.2	-2.91	-3.43	0.000381503	0.00012287	1	5.54e-07	FALSE	TRUE	TRUE	nuc	7941100	3363700	7720800	2087600	1640400	1837100	0	0	0	4	3	3	1	1	1	1	0	0
581	Arginine--tRNA ligase, cytoplasmic OS=Homo sapiens OX=9606 GN=RARS PE=1 SV=2	P54136	RARS	75.378	-0.253	-0.852	0.714686	0.236608	1	0.465	FALSE	FALSE	FALSE	other	0	1641900	0	0	0	0	0	0	0	0	2	0	0	0	0	0	0	0
582	Histone-binding protein RBBP4 OS=Homo sapiens OX=9606 GN=RBBP4 PE=1 SV=3	Q09028	RBBP4	47.655	0.171	0.951	0.865815	0.358594	1	0.505	FALSE	FALSE	FALSE	nuc	0	0	0	0	0	0	2285300	6109100	0	0	0	0	0	0	0	1	1	0
583	E3 ubiquitin-protein ligase RBBP6 OS=Homo sapiens OX=9606 GN=RBBP6 PE=1 SV=1;E3 ubiquitin-protein ligase RBBP6 (Fragment) OS=Homo sapiens OX=9606 GN=RBBP6 PE=1 SV=1	Q7Z6E9	RBBP6	201.56	1.4	-0.00974	0.374213	0.994955	1	0.693	FALSE	FALSE	FALSE	nuc	4813400	1220300	0	5296900	2490400	0	3969100	1488400	0	6	1	0	4	3	0	3	1	0
59	Histone-binding protein RBBP7 OS=Homo sapiens OX=9606 GN=RBBP7 PE=1 SV=1;Histone-binding protein RBBP7 OS=Homo sapiens OX=9606 GN=RBBP7 PE=1 SV=1	Q16576	RBBP7	47.82	0.834	5.23	0.192635	1.61354e-05	1	9.87e-12	FALSE	TRUE	TRUE	nuc	2336800	0	0	0	0	0	24854000	11482000	10348000	1	0	0	0	0	0	4	2	2
60	RNA-binding protein fox-1 homolog 2 (Fragment) OS=Homo sapiens OX=9606 GN=RBFOX2 PE=1 SV=1;RNA-binding protein fox-1 homolog 2 (Fragment) OS=Homo sapiens OX=9606 GN=RBFOX2 PE=1 SV=1;RNA-binding protein fox-1 homolog 2 (Fragment) OS=Homo sapiens OX=9606 GN=	A0A0G2JRD1	RBFOX2	23.543	0.31	3.28	0.63165	0.000669628	1	0.000155	FALSE	TRUE	TRUE	nuc	0	0	0	0	0	2214800	3115500	6655700	6866300	1	1	0	0	0	1	2	3	2
61	RNA-binding protein 10 OS=Homo sapiens OX=9606 GN=RBM10 PE=1 SV=3	P98175	RBM10	103.53	0.47	3.47	0.508672	0.000838198	1	0.000279	FALSE	TRUE	TRUE	nuc	0	0	0	0	0	0	2501400	3827500	6642400	0	0	0	0	0	0	3	2	4
584	RNA-binding protein 14 OS=Homo sapiens OX=9606 GN=RBM14 PE=1 SV=2	Q96PK6	RBM14	69.491	0.362	1.24	0.42983	0.0206212	1	0.105	FALSE	FALSE	FALSE	nuc	133510000	108970000	121960000	92200000	97310000	123460000	206210000	303360000	295660000	14	15	14	14	13	15	15	14	16
585	Splicing factor 45 (Fragment) OS=Homo sapiens OX=9606 GN=RBM17 PE=1 SV=1;Splicing factor 45 (Fragment) OS=Homo sapiens OX=9606 GN=RBM17 PE=1 SV=1;Splicing factor 45 (Fragment) OS=Homo sapiens OX=9606 GN=RBM17 PE=1 SV=1;Splicing factor 45 (Fragment) OS=Homo	Q5W011	RBM17	24.176	0.711	1	0.511293	0.361452	1	0.506	FALSE	FALSE	FALSE	nuc	0	0	0	0	0	0	4252900	0	0	0	0	0	0	0	0	1	0	0
586	RNA-binding protein 25 OS=Homo sapiens OX=9606 GN=RBM25 PE=1 SV=3	P49756	RBM25	100.18	-1.29	0.266	0.278819	0.816867	1	0.656	FALSE	FALSE	FALSE	nuc	4482900	2729300	0	4745900	979200	0	5817400	3592600	0	2	2	0	1	1	0	3	2	0
587	RNA-binding protein 28 OS=Homo sapiens OX=9606 GN=RBM28 PE=1 SV=3	Q9NW13	RBM28	85.737	1.16	-0.173	0.271089	0.864489	1	0.667	FALSE	FALSE	FALSE	nuc	0	0	0	0	2063900	0	0	4485800	0	0	0	0	0	2	0	0	2	0
588	RNA-binding protein 3 OS=Homo sapiens OX=9606 GN=RBM3 PE=1 SV=1	P98179	RBM3	17.17	0.874	4.1	0.546636	0.0177602	1	0.0896	FALSE	FALSE	FALSE	nuc	0	0	0	0	0	0	0	47692000	14773000	0	0	0	0	0	0	0	3	2
589	RNA-binding protein 39 OS=Homo sapiens OX=9606 GN=RBM39 PE=1 SV=2;RNA-binding protein 39 (Fragment) OS=Homo sapiens OX=9606 GN=RBM39 PE=1 SV=8;RNA-binding protein 39 OS=Homo sapiens OX=9606 GN=RBM39 PE=1 SV=1;RNA-binding protein 39 (Fragment) OS=Homo sapie	Q14498	RBM39	59.379	-1.25	0.94	0.493694	0.603484	1	0.598	FALSE	FALSE	FALSE	nuc	56429000	6801400	9468500	32448000	15305000	2210700	75833000	35893000	22125000	8	3	2	9	4	2	8	8	5
62	RNA-binding protein 4 OS=Homo sapiens OX=9606 GN=RBM4 PE=1 SV=1;RNA-binding protein 4 (Fragment) OS=Homo sapiens OX=9606 GN=RBM4 PE=1 SV=1;RNA-binding protein 4B OS=Homo sapiens OX=9606 GN=RBM4B PE=1 SV=1	Q9BWF3	RBM4	40.313	0.331	5.27	0.655207	6.42521e-05	1	3.19e-08	FALSE	TRUE	TRUE	nuc	0	0	0	0	0	0	7979300	29027000	25222000	0	0	0	0	0	0	3	6	5
590	RNA-binding protein 6 OS=Homo sapiens OX=9606 GN=RBM6 PE=1 SV=1;RNA-binding protein 5 OS=Homo sapiens OX=9606 GN=RBM5 PE=1 SV=2;RNA-binding protein 6 OS=Homo sapiens OX=9606 GN=RBM6 PE=1 SV=5	E9PGM9	RBM6	113.93	1.41	1.37	0.0686367	0.0761764	1	0.31	FALSE	FALSE	FALSE	nuc	0	0	0	0	0	0	946580	1272400	1197000	0	0	0	0	0	0	1	1	1
591	Protein RCC2 OS=Homo sapiens OX=9606 GN=RCC2 PE=1 SV=2	Q9P258	RCC2	56.084	-0.0324	2.45	0.978046	0.062558	1	0.276	FALSE	FALSE	FALSE	other	0	0	0	0	0	0	7443900	10063000	6733700	0	0	0	0	0	0	2	3	2
592	Reticulocalbin-1 OS=Homo sapiens OX=9606 GN=RCN1 PE=1 SV=1	Q15293	RCN1	38.89	0.359	0.00447	0.456688	0.992492	1	0.692	FALSE	FALSE	FALSE	other	89381000	86250000	148890000	81810000	88144000	96618000	77663000	52903000	93595000	8	8	8	8	8	8	7	5	7
593	Reticulocalbin-3 (Fragment) OS=Homo sapiens OX=9606 GN=RCN3 PE=1 SV=1;Reticulocalbin-3 OS=Homo sapiens OX=9606 GN=RCN3 PE=1 SV=1	M0QZH0	RCN3	19.813	0.311	0.428	0.647295	0.531561	1	0.572	FALSE	FALSE	FALSE	other	0	0	0	0	1726800	0	828510	943210	0	0	0	0	0	1	1	1	1	0
594	ATP-dependent DNA helicase Q1 OS=Homo sapiens OX=9606 GN=RECQL PE=1 SV=3	P46063	RECQL	73.457	0.852	2.8	0.436773	0.026773	1	0.138	FALSE	FALSE	FALSE	nuc	0	0	0	0	0	0	3935500	1791700	9508800	0	0	0	0	0	0	2	1	4
595	Receptor expression-enhancing protein (Fragment) OS=Homo sapiens OX=9606 GN=REEP5 PE=1 SV=1;Receptor expression-enhancing protein 5 OS=Homo sapiens OX=9606 GN=REEP5 PE=1 SV=3	E2QRG8	REEP5	18.121	1.47	0.817	0.0156941	0.130739	1	0.394	FALSE	FALSE	FALSE	other	1403200	1115300	1416900	480790	0	961530	0	0	0	1	1	1	1	0	1	0	0	0
596	Protein RER1 OS=Homo sapiens OX=9606 GN=RER1 PE=1 SV=1;Protein RER1 (Fragment) OS=Homo sapiens OX=9606 GN=RER1 PE=1 SV=1;Protein RER1 (Fragment) OS=Homo sapiens OX=9606 GN=RER1 PE=1 SV=1;Protein RER1 OS=Homo sapiens OX=9606 GN=RER1 PE=1 SV=1;Protein RER1 O	Q5T093	RER1	13.439	0.797	0.543	0.312265	0.4836	1	0.553	FALSE	FALSE	FALSE	other	0	0	386260	0	0	0	0	0	0	0	0	1	0	0	0	0	0	0
597	Transforming protein RhoA OS=Homo sapiens OX=9606 GN=RHOA PE=1 SV=1	P61586	RHOA	21.768	-0.279	-2.61	0.76438	0.0193284	1	0.098	FALSE	FALSE	FALSE	cyto	16060000	10650000	9839300	8173500	7610100	6189300	2474800	0	0	3	3	2	3	3	2	3	0	0
63	Regulator of microtubule dynamics protein 3 OS=Homo sapiens OX=9606 GN=RMDN3 PE=1 SV=2;Regulator of microtubule dynamics protein 3 (Fragment) OS=Homo sapiens OX=9606 GN=RMDN3 PE=1 SV=1	Q96TC7	RMDN3	52.118	-3.11	-4.52	0.00741579	0.00081733	1	0.000262	FALSE	TRUE	TRUE	mito	20242000	22800000	14978000	1734600	2323200	5402300	0	0	0	5	6	4	1	1	2	0	0	0
598	Ribonuclease H2 subunit B (Fragment) OS=Homo sapiens OX=9606 GN=RNASEH2B PE=1 SV=1;Ribonuclease H2 subunit B OS=Homo sapiens OX=9606 GN=RNASEH2B PE=1 SV=1;Ribonuclease H2 subunit B (Fragment) OS=Homo sapiens OX=9606 GN=RNASEH2B PE=1 SV=1;Ribonuclease H2 su	A0A2R8Y459	RNASEH2B	18.379	0.546	-0.0359	0.445888	0.959268	1	0.686	FALSE	FALSE	FALSE	nuc	0	0	0	0	0	0	206080	208160	314240	0	0	0	0	0	0	1	1	1
599	E3 ubiquitin-protein ligase RNF114 (Fragment) OS=Homo sapiens OX=9606 GN=RNF114 PE=1 SV=1;E3 ubiquitin-protein ligase RNF114 OS=Homo sapiens OX=9606 GN=RNF114 PE=1 SV=1;E3 ubiquitin-protein ligase RNF114 OS=Homo sapiens OX=9606 GN=RNF114 PE=1 SV=1	A0A096LNV3	RNF114	20.885	0.646	0.477	0.362211	0.496472	1	0.558	FALSE	FALSE	FALSE	cyto	498200	507760	0	0	0	0	0	0	1098700	1	1	0	0	0	0	0	0	1
600	Ribonuclease inhibitor OS=Homo sapiens OX=9606 GN=RNH1 PE=1 SV=2	P13489	RNH1	49.973	0.928	0.574	0.257928	0.473285	1	0.548	FALSE	FALSE	FALSE	other	0	0	0	0	0	0	777880	1347100	0	0	0	0	0	0	0	1	1	0
601	Retinitis pigmentosa 9 protein OS=Homo sapiens OX=9606 GN=RP9 PE=1 SV=2	Q8TA86	RP9	26.106	1.79	0.0194	0.16679	0.987308	1	0.691	FALSE	FALSE	FALSE	nuc	3454200	0	0	7671000	0	0	0	0	0	1	0	0	2	0	0	0	0	0
602	Replication protein A 70 kDa DNA-binding subunit OS=Homo sapiens OX=9606 GN=RPA1 PE=1 SV=2;Replication protein A 70 kDa DNA-binding subunit (Fragment) OS=Homo sapiens OX=9606 GN=RPA1 PE=1 SV=1	P27694	RPA1	68.137	0.486	1.5	0.664996	0.201658	1	0.448	FALSE	FALSE	FALSE	nuc	0	0	0	0	0	0	1051500	13125000	9479700	0	0	0	0	0	0	1	5	2
603	Replication protein A 32 kDa subunit (Fragment) OS=Homo sapiens OX=9606 GN=RPA2 PE=1 SV=1;Replication protein A 32 kDa subunit OS=Homo sapiens OX=9606 GN=RPA2 PE=1 SV=1	Q5TEJ7	RPA2	19.433	0.967	0.818	0.328183	0.404562	1	0.522	FALSE	FALSE	FALSE	nuc	0	0	0	0	0	0	0	3105100	3248900	0	0	0	0	0	0	0	1	1
604	60S ribosomal protein L10 OS=Homo sapiens OX=9606 GN=RPL10 PE=1 SV=2;60S ribosomal protein L10 OS=Homo sapiens OX=9606 GN=RPL10 PE=1 SV=1;60S ribosomal protein L10 (Fragment) OS=Homo sapiens OX=9606 GN=RPL10 PE=1 SV=7;60S ribosomal protein L10 OS=Homo sapi	F8W7C6	RPL10	18.565	2.32	2.07	0.191559	0.240065	1	0.467	FALSE	FALSE	FALSE	cyto	28377000	12343000	32671000	24818000	11344000	20622000	11688000	37430000	32442000	3	1	3	3	2	2	2	4	3
605	60S ribosomal protein L10a OS=Homo sapiens OX=9606 GN=RPL10A PE=1 SV=2	P62906	RPL10A	24.831	1.04	2.05	0.667442	0.404282	1	0.521	FALSE	FALSE	FALSE	cyto	11518000	0	0	2178200	43734000	0	3956800	99140000	0	3	0	0	3	4	0	3	6	0
606	60S ribosomal protein L11 OS=Homo sapiens OX=9606 GN=RPL11 PE=1 SV=2;60S ribosomal protein L11 OS=Homo sapiens OX=9606 GN=RPL11 PE=1 SV=2	P62913	RPL11	20.252	0.159	1.68	0.924751	0.330776	1	0.497	FALSE	FALSE	FALSE	other	7471400	8217700	9330800	5853800	7891800	8176800	5846800	47785000	4485700	2	1	2	1	2	1	3	3	1
607	60S ribosomal protein L12 OS=Homo sapiens OX=9606 GN=RPL12 PE=1 SV=1	P30050	RPL12	17.818	1.61	1.65	0.572615	0.563856	1	0.584	FALSE	FALSE	FALSE	other	27877000	1870900	5074200	9059100	114200000	0	9044800	233820000	0	4	1	3	2	6	1	2	6	0
608	60S ribosomal protein L13 OS=Homo sapiens OX=9606 GN=RPL13 PE=1 SV=4;60S ribosomal protein L13 (Fragment) OS=Homo sapiens OX=9606 GN=RPL13 PE=1 SV=1	P26373	RPL13	24.261	2.06	1.98	0.193449	0.211165	1	0.453	FALSE	FALSE	FALSE	other	20311000	10823000	18818000	16889000	16821000	21535000	20729000	28291000	17483000	3	2	2	4	3	3	4	3	3
609	60S ribosomal protein L13a OS=Homo sapiens OX=9606 GN=RPL13A PE=1 SV=2;60S ribosomal protein L13a (Fragment) OS=Homo sapiens OX=9606 GN=RPL13A PE=1 SV=2;60S ribosomal protein L13a OS=Homo sapiens OX=9606 GN=RPL13A PE=1 SV=1	P40429	RPL13A	23.577	4.43	4.23	0.0788156	0.0906578	1	0.338	FALSE	FALSE	FALSE	other	7421200	16249000	0	0	83901000	11546000	0	222840000	10361000	1	1	1	0	4	2	1	4	2
610	60S ribosomal protein L14 OS=Homo sapiens OX=9606 GN=RPL14 PE=1 SV=1;60S ribosomal protein L14 OS=Homo sapiens OX=9606 GN=RPL14 PE=1 SV=4	E7EPB3	RPL14	14.558	4.67	2.69	0.100128	0.316321	1	0.492	FALSE	FALSE	FALSE	cyto	3145100	0	3839100	3037700	88519000	6639100	0	296810000	0	1	1	1	1	4	2	0	4	0
611	60S ribosomal protein L15 OS=Homo sapiens OX=9606 GN=RPL15 PE=1 SV=2;Ribosomal protein L15 (Fragment) OS=Homo sapiens OX=9606 GN=RPL15 PE=1 SV=1;Ribosomal protein L15 (Fragment) OS=Homo sapiens OX=9606 GN=RPL15 PE=1 SV=1;Ribosomal protein L15 (Fragment) OS	P61313	RPL15	24.146	0.983	1.11	0.342333	0.287668	1	0.484	FALSE	FALSE	FALSE	other	21549000	37317000	22883000	9174100	159170000	25529000	19112000	347550000	17244000	3	4	4	2	8	5	4	8	4
612	60S ribosomal protein L17 (Fragment) OS=Homo sapiens OX=9606 GN=RPL17 PE=3 SV=1;60S ribosomal protein L17 (Fragment) OS=Homo sapiens OX=9606 GN=RPL17 PE=3 SV=1;60S ribosomal protein L17 (Fragment) OS=Homo sapiens OX=9606 GN=RPL17 PE=3 SV=1;Protein RPL17-C1	A0A087WXM6	RPL17	19.586	0.0787	-0.0387	0.861517	0.931647	1	0.681	FALSE	FALSE	FALSE	cyto	44309000	36896000	55308000	19783000	30268000	41414000	33103000	64492000	30968000	4	3	4	3	4	4	4	4	3
613	60S ribosomal protein L18 (Fragment) OS=Homo sapiens OX=9606 GN=RPL18 PE=1 SV=1;60S ribosomal protein L18 (Fragment) OS=Homo sapiens OX=9606 GN=RPL18 PE=1 SV=1;60S ribosomal protein L18 OS=Homo sapiens OX=9606 GN=RPL18 PE=1 SV=2;60S ribosomal protein L18 (	H0YHA7	RPL18	18.863	0.769	1.57	0.810833	0.626112	1	0.605	FALSE	FALSE	FALSE	cyto	5756600	26212000	15992000	3908800	332930000	4860800	4873800	1079500000	11406000	1	4	2	2	6	2	1	7	2
614	60S ribosomal protein L18a (Fragment) OS=Homo sapiens OX=9606 GN=RPL18A PE=1 SV=1;60S ribosomal protein L18a OS=Homo sapiens OX=9606 GN=RPL18A PE=1 SV=1;60S ribosomal protein L18a OS=Homo sapiens OX=9606 GN=RPL18A PE=1 SV=1;60S ribosomal protein L18a OS=Ho	M0R3D6	RPL18A	16.714	1.02	0.529	0.732509	0.859598	1	0.666	FALSE	FALSE	FALSE	other	17891000	23772000	30249000	6968900	129210000	19267000	10365000	257780000	9121200	1	3	1	1	4	2	2	4	1
615	Ribosomal protein L19 OS=Homo sapiens OX=9606 GN=RPL19 PE=1 SV=1;Ribosomal protein L19 OS=Homo sapiens OX=9606 GN=RPL19 PE=1 SV=1;60S ribosomal protein L19 OS=Homo sapiens OX=9606 GN=RPL19 PE=1 SV=1	J3QR09	RPL19	23.134	0.139	1.78	0.944207	0.381324	1	0.514	FALSE	FALSE	FALSE	other	23693000	10376000	35784000	15390000	6725900	20420000	18757000	25274000	18714000	2	1	2	2	1	2	2	2	2
616	60S ribosomal protein L21 OS=Homo sapiens OX=9606 GN=RPL21 PE=1 SV=1;60S ribosomal protein L21 (Fragment) OS=Homo sapiens OX=9606 GN=RPL21 PE=1 SV=1;60S ribosomal protein L21 OS=Homo sapiens OX=9606 GN=RPL21 PE=1 SV=2	G3V1B3	RPL21	9.8864	0.56	2.42	0.694577	0.116081	1	0.377	FALSE	FALSE	FALSE	other	0	7938300	0	4903200	16526000	0	0	39501000	0	0	1	0	1	1	0	0	2	1
617	60S ribosomal protein L22 OS=Homo sapiens OX=9606 GN=RPL22 PE=1 SV=2;60S ribosomal protein L22 (Fragment) OS=Homo sapiens OX=9606 GN=RPL22 PE=1 SV=1;60S ribosomal protein L22 (Fragment) OS=Homo sapiens OX=9606 GN=RPL22 PE=1 SV=1;Uncharacterized protein OS=	P35268	RPL22	14.787	-1.32	0.319	0.247639	0.771486	1	0.645	FALSE	FALSE	FALSE	nuc	24851000	24012000	25085000	10332000	21078000	23137000	20614000	60502000	20673000	2	2	2	1	2	2	2	3	2
618	60S ribosomal protein L23 OS=Homo sapiens OX=9606 GN=RPL23 PE=1 SV=1;60S ribosomal protein L23 (Fragment) OS=Homo sapiens OX=9606 GN=RPL23 PE=1 SV=1;60S ribosomal protein L23 OS=Homo sapiens OX=9606 GN=RPL23 PE=1 SV=1;60S ribosomal protein L23 OS=Homo sapi	P62829	RPL23	14.865	-1.42	-1.85	0.46416	0.345121	1	0.501	FALSE	FALSE	FALSE	cyto	25117000	51760000	51814000	16367000	50641000	46624000	23870000	23226000	34162000	2	3	3	1	3	3	2	1	2
64	60S ribosomal protein L23a (Fragment) OS=Homo sapiens OX=9606 GN=RPL23A PE=1 SV=1;60S ribosomal protein L23a (Fragment) OS=Homo sapiens OX=9606 GN=RPL23A PE=1 SV=1;60S ribosomal protein L23a (Fragment) OS=Homo sapiens OX=9606 GN=RPL23A PE=1 SV=1;60S riboso	H7BY10	RPL23A	17.692	0.428	-3.7	0.365738	2.78764e-05	1	3.07e-10	FALSE	TRUE	TRUE	other	5442000	11440000	9710100	4860800	14537000	9082700	2381400	11118000	2901000	2	2	2	2	3	2	1	1	1
619	60S ribosomal protein L24 OS=Homo sapiens OX=9606 GN=RPL24 PE=1 SV=1;60S ribosomal protein L24 OS=Homo sapiens OX=9606 GN=RPL24 PE=1 SV=1;60S ribosomal protein L24 OS=Homo sapiens OX=9606 GN=RPL24 PE=1 SV=1	C9JXB8	RPL24	14.369	3.96	2.38	0.0353779	0.168209	1	0.427	FALSE	FALSE	FALSE	cyto	3786200	6731500	5710600	4008100	10696000	23265000	3494100	23016000	10846000	1	1	1	2	2	3	1	2	1
620	60S ribosomal protein L26 (Fragment) OS=Homo sapiens OX=9606 GN=RPL26 PE=4 SV=1;Uncharacterized protein OS=Homo sapiens OX=9606 PE=4 SV=1;60S ribosomal protein L26 OS=Homo sapiens OX=9606 GN=RPL26 PE=4 SV=1;60S ribosomal protein L26 (Fragment) OS=Homo sapi	J3QRI7	RPL26	12.63	-0.17	-0.164	0.925153	0.92757	1	0.68	FALSE	FALSE	FALSE	cyto	5683100	16906000	18226000	11145000	7825100	8686500	11133000	18278000	6209200	2	2	2	3	3	2	2	3	1
621	60S ribosomal protein L27 OS=Homo sapiens OX=9606 GN=RPL27 PE=1 SV=2;60S ribosomal protein L27 (Fragment) OS=Homo sapiens OX=9606 GN=RPL27 PE=1 SV=1	P61353	RPL27	15.798	3.12	3.09	0.250122	0.255628	1	0.473	FALSE	FALSE	FALSE	nuc	3849100	4167500	3044800	2356300	111890000	2027500	2701300	209200000	1104300	3	1	1	2	3	1	1	3	1
622	60S ribosomal protein L27a OS=Homo sapiens OX=9606 GN=RPL27A PE=1 SV=1;60S ribosomal protein L27a OS=Homo sapiens OX=9606 GN=RPL27A PE=1 SV=1;60S ribosomal protein L27a OS=Homo sapiens OX=9606 GN=RPL27A PE=1 SV=2	E9PJD9	RPL27A	10.127	0.154	-0.153	0.714547	0.716156	1	0.631	FALSE	FALSE	FALSE	cyto	33459000	46597000	49241000	29202000	28121000	41782000	24339000	42663000	31637000	3	3	4	3	3	3	3	3	3
623	60S ribosomal protein L28 OS=Homo sapiens OX=9606 GN=RPL28 PE=1 SV=1;60S ribosomal protein L28 OS=Homo sapiens OX=9606 GN=RPL28 PE=1 SV=1;60S ribosomal protein L28 OS=Homo sapiens OX=9606 GN=RPL28 PE=1 SV=1;60S ribosomal protein L28 OS=Homo sapiens OX=9606	H0YLP6	RPL28	9.657	1.26	1.36	0.619436	0.591433	1	0.594	FALSE	FALSE	FALSE	cyto	8946700	9649200	6460100	6551300	66201000	5310800	6450400	208800000	4560100	2	4	1	3	3	2	2	3	1
624	60S ribosomal protein L29 OS=Homo sapiens OX=9606 GN=RPL29 PE=1 SV=1;60S ribosomal protein L29 OS=Homo sapiens OX=9606 GN=RPL29 PE=1 SV=2	A0A3B3ITT5	RPL29	18.512	0.81	1.15	0.475323	0.317237	1	0.493	FALSE	FALSE	FALSE	other	0	0	0	0	19900000	0	0	46038000	3300400	0	1	0	0	1	0	0	1	1
625	60S ribosomal protein L3 OS=Homo sapiens OX=9606 GN=RPL3 PE=1 SV=2;60S ribosomal protein L3 (Fragment) OS=Homo sapiens OX=9606 GN=RPL3 PE=1 SV=1;60S ribosomal protein L3 OS=Homo sapiens OX=9606 GN=RPL3 PE=1 SV=1;60S ribosomal protein L3 (Fragment) OS=Homo	P39023	RPL3	46.108	1.59	1.97	0.391253	0.295365	1	0.486	FALSE	FALSE	FALSE	other	8188500	48585000	16266000	6905100	303640000	17378000	5906800	981360000	22710000	2	7	2	3	9	3	2	10	5
626	60S ribosomal protein L30 OS=Homo sapiens OX=9606 GN=RPL30 PE=1 SV=2;60S ribosomal protein L30 (Fragment) OS=Homo sapiens OX=9606 GN=RPL30 PE=1 SV=1;60S ribosomal protein L30 OS=Homo sapiens OX=9606 GN=RPL30 PE=1 SV=1	P62888	RPL30	12.784	2.22	2.13	0.340112	0.359821	1	0.506	FALSE	FALSE	FALSE	cyto	0	0	0	0	36810000	0	0	96772000	0	0	0	0	0	3	0	0	5	0
627	60S ribosomal protein L31 OS=Homo sapiens OX=9606 GN=RPL31 PE=1 SV=1;60S ribosomal protein L31 OS=Homo sapiens OX=9606 GN=RPL31 PE=1 SV=1;60S ribosomal protein L31 (Fragment) OS=Homo sapiens OX=9606 GN=RPL31 PE=1 SV=1;60S ribosomal protein L31 (Fragment) O	P62899	RPL31	14.463	0.311	1.47	0.782169	0.213415	1	0.454	FALSE	FALSE	FALSE	other	0	15921000	0	0	6254600	0	0	19221000	8307200	1	1	1	2	1	1	1	1	1
628	60S ribosomal protein L32 (Fragment) OS=Homo sapiens OX=9606 GN=RPL32 PE=1 SV=1;60S ribosomal protein L32 OS=Homo sapiens OX=9606 GN=RPL32 PE=1 SV=1;60S ribosomal protein L32 OS=Homo sapiens OX=9606 GN=RPL32 PE=1 SV=2	D3YTB1	RPL32	15.616	0.401	2.43	0.791096	0.134831	1	0.398	FALSE	FALSE	FALSE	cyto	0	0	0	0	0	0	0	47534000	0	0	0	0	0	1	0	0	3	0
629	60S ribosomal protein L34 OS=Homo sapiens OX=9606 GN=RPL34 PE=1 SV=3	P49207	RPL34	13.293	2.44	2.4	0.274295	0.282293	1	0.482	FALSE	FALSE	FALSE	other	0	0	2436600	0	23759000	2526900	0	95676000	0	0	0	1	0	3	1	0	4	0
630	60S ribosomal protein L35 OS=Homo sapiens OX=9606 GN=RPL35 PE=1 SV=1;60S ribosomal protein L35 OS=Homo sapiens OX=9606 GN=RPL35 PE=1 SV=2	F2Z388	RPL35	10.645	0.696	0.994	0.380664	0.221385	1	0.458	FALSE	FALSE	FALSE	cyto	3360700	5518500	3882900	3132300	2771400	4120600	3871100	7337600	2072700	1	1	1	1	1	1	1	1	1
631	60S ribosomal protein L35a (Fragment) OS=Homo sapiens OX=9606 GN=RPL35A PE=1 SV=1;60S ribosomal protein L35a OS=Homo sapiens OX=9606 GN=RPL35A PE=1 SV=2	C9K025	RPL35A	10.645	2.67	2.8	0.2746	0.25359	1	0.472	FALSE	FALSE	FALSE	other	0	0	0	0	42423000	0	0	147990000	0	0	0	0	0	2	0	0	3	0
632	60S ribosomal protein L36 OS=Homo sapiens OX=9606 GN=RPL36 PE=1 SV=3;60S ribosomal protein L36 OS=Homo sapiens OX=9606 GN=RPL36 PE=1 SV=1	Q9Y3U8	RPL36	12.254	3.22	2.62	0.176829	0.263782	1	0.476	FALSE	FALSE	FALSE	cyto	0	0	0	0	38288000	0	0	123760000	0	0	0	0	0	4	0	0	4	0
633	60S ribosomal protein L36a OS=Homo sapiens OX=9606 GN=RPL36A PE=3 SV=2;RPL36A-HNRNPH2 readthrough OS=Homo sapiens OX=9606 GN=RPL36A-HNRNPH2 PE=3 SV=2;60S ribosomal protein L36a OS=Homo sapiens OX=9606 GN=RPL36A PE=1 SV=1;60S ribosomal protein L36a-like OS=	H0Y5B4	RPL36A	13.228	0.238	0.0916	0.786166	0.916526	1	0.678	FALSE	FALSE	FALSE	cyto	6492200	6798900	3328800	4718600	8223500	3719500	4223800	11907000	2339500	1	1	1	1	1	1	1	1	1
634	60S ribosomal protein L37a OS=Homo sapiens OX=9606 GN=RPL37A PE=1 SV=1;60S ribosomal protein L37a OS=Homo sapiens OX=9606 GN=RPL37A PE=1 SV=2;60S ribosomal protein L37a OS=Homo sapiens OX=9606 GN=RPL37A PE=1 SV=1;60S ribosomal protein L37a OS=Homo sapiens	C9J4Z3	RPL37A	7.624	-0.614	0.542	0.608464	0.650476	1	0.613	FALSE	FALSE	FALSE	cyto	3992700	2594800	2908200	1473300	1002200	1435000	3150600	5078700	669870	2	1	2	1	1	1	2	2	1
635	60S ribosomal protein L4 OS=Homo sapiens OX=9606 GN=RPL4 PE=1 SV=5;60S ribosomal protein L4 OS=Homo sapiens OX=9606 GN=RPL4 PE=1 SV=1	P36578	RPL4	47.697	1.16	1.36	0.376338	0.30246	1	0.488	FALSE	FALSE	FALSE	cyto	34464000	31248000	35035000	22577000	401720000	25250000	43224000	1093300000	17906000	7	9	6	6	14	6	9	16	4
636	60S ribosomal protein L5 (Fragment) OS=Homo sapiens OX=9606 GN=RPL5 PE=1 SV=1;60S ribosomal protein L5 OS=Homo sapiens OX=9606 GN=RPL5 PE=1 SV=3;60S ribosomal protein L5 (Fragment) OS=Homo sapiens OX=9606 GN=RPL5 PE=1 SV=2	A0A2R8Y6J3	RPL5	27.045	1.58	0.657	0.374033	0.706455	1	0.629	FALSE	FALSE	FALSE	cyto	0	0	6397800	0	11345000	6841200	0	41140000	2045000	0	0	2	0	2	2	0	4	1
637	60S ribosomal protein L6 OS=Homo sapiens OX=9606 GN=RPL6 PE=1 SV=3	Q02878	RPL6	32.728	0.338	2.28	0.875983	0.308075	1	0.49	FALSE	FALSE	FALSE	cyto	11903000	17345000	13345000	0	311730000	15770000	11906000	1028000000	15106000	2	4	3	1	10	3	2	11	3
638	60S ribosomal protein L7 OS=Homo sapiens OX=9606 GN=RPL7 PE=1 SV=1;60S ribosomal protein L7 OS=Homo sapiens OX=9606 GN=RPL7 PE=1 SV=1	P18124	RPL7	29.225	2.01	2.31	0.243587	0.185872	1	0.439	FALSE	FALSE	FALSE	cyto	17528000	6782300	9332000	5906900	241290000	24841000	8419200	694030000	13886000	3	2	2	3	10	5	3	9	4
639	60S ribosomal protein L7a OS=Homo sapiens OX=9606 GN=RPL7A PE=1 SV=2;60S ribosomal protein L7a (Fragment) OS=Homo sapiens OX=9606 GN=RPL7A PE=1 SV=1;60S ribosomal protein L7a OS=Homo sapiens OX=9606 GN=RPL7A PE=1 SV=1	P62424	RPL7A	29.995	1.32	1.45	0.277326	0.235574	1	0.465	FALSE	FALSE	FALSE	nuc	29536000	17503000	38344000	25658000	268060000	35617000	31021000	676660000	16958000	6	3	6	6	10	7	6	14	4
640	60S ribosomal protein L8 OS=Homo sapiens OX=9606 GN=RPL8 PE=1 SV=2;60S ribosomal protein L8 (Fragment) OS=Homo sapiens OX=9606 GN=RPL8 PE=1 SV=1;60S ribosomal protein L8 OS=Homo sapiens OX=9606 GN=RPL8 PE=1 SV=1;60S ribosomal protein L8 (Fragment) OS=Homo	P62917	RPL8	28.024	0.88	0.978	0.358722	0.310762	1	0.491	FALSE	FALSE	FALSE	other	16333000	48410000	23260000	9654400	218280000	21795000	31867000	294610000	29740000	2	3	2	2	5	2	4	4	3
641	60S ribosomal protein L9 OS=Homo sapiens OX=9606 GN=RPL9 PE=1 SV=1;60S ribosomal protein L9 (Fragment) OS=Homo sapiens OX=9606 GN=RPL9 PE=1 SV=8;60S ribosomal protein L9 OS=Homo sapiens OX=9606 GN=RPL9 PE=1 SV=1;60S ribosomal protein L9 OS=Homo sapiens OX=	P32969	RPL9	21.863	0.362	0.195	0.397586	0.643455	1	0.61	FALSE	FALSE	FALSE	cyto	22567000	33129000	28367000	20505000	14845000	29987000	23771000	28251000	19038000	3	3	3	2	3	3	3	4	2
642	60S acidic ribosomal protein P0 OS=Homo sapiens OX=9606 GN=RPLP0 PE=1 SV=1;60S acidic ribosomal protein P0 OS=Homo sapiens OX=9606 GN=RPLP0 PE=1 SV=1;60S acidic ribosomal protein P0 (Fragment) OS=Homo sapiens OX=9606 GN=RPLP0 PE=1 SV=1;60S acidic ribosomal	P05388	RPLP0	34.273	0.92	2.3	0.719252	0.379752	1	0.513	FALSE	FALSE	FALSE	cyto	15929000	0	0	2193100	73349000	2351400	6127300	153760000	0	4	0	1	1	6	2	2	5	0
643	60S acidic ribosomal protein P1 OS=Homo sapiens OX=9606 GN=RPLP1 PE=1 SV=1	P05386	RPLP1	11.514	2.56	2.33	0.26856	0.310412	1	0.491	FALSE	FALSE	FALSE	cyto	0	0	0	0	30887000	0	3968600	92924000	0	0	0	0	0	2	0	1	2	0
644	60S acidic ribosomal protein P2 OS=Homo sapiens OX=9606 GN=RPLP2 PE=1 SV=1	P05387	RPLP2	11.665	3.01	2.81	0.222396	0.252411	1	0.472	FALSE	FALSE	FALSE	other	0	0	3774800	0	49732000	3985600	5885900	136740000	0	0	0	1	0	4	1	1	5	0
645	40S ribosomal protein S10 OS=Homo sapiens OX=9606 GN=RPS10 PE=1 SV=1;RPS10-NUDT3 readthrough (Fragment) OS=Homo sapiens OX=9606 GN=RPS10-NUDT3 PE=4 SV=1;40S ribosomal protein S10 OS=Homo sapiens OX=9606 GN=RPS10 PE=4 SV=1;40S ribosomal protein S10 OS=Homo	P46783	RPS10	18.898	0.944	1.03	0.4167	0.376365	1	0.512	FALSE	FALSE	FALSE	cyto	0	2098100	5374900	0	0	2464900	0	8549700	0	0	1	2	0	0	1	0	2	0
646	40S ribosomal protein S11 OS=Homo sapiens OX=9606 GN=RPS11 PE=1 SV=3;40S ribosomal protein S11 OS=Homo sapiens OX=9606 GN=RPS11 PE=1 SV=1;40S ribosomal protein S11 OS=Homo sapiens OX=9606 GN=RPS11 PE=1 SV=1	P62280	RPS11	18.431	-0.449	2.8	0.786356	0.117308	1	0.378	FALSE	FALSE	FALSE	cyto	7082200	15556000	2586300	9248800	7567500	4369200	11650000	17635000	12163000	1	2	1	2	1	1	3	2	3
647	40S ribosomal protein S12 OS=Homo sapiens OX=9606 GN=RPS12 PE=1 SV=3	P25398	RPS12	14.515	-0.184	-1.88	0.888971	0.177667	1	0.433	FALSE	FALSE	FALSE	cyto	32297000	15255000	24904000	5532400	11114000	18379000	15460000	28926000	2210600	4	3	3	1	2	3	5	3	1
648	40S ribosomal protein S13 OS=Homo sapiens OX=9606 GN=RPS13 PE=1 SV=1;40S ribosomal protein S13 OS=Homo sapiens OX=9606 GN=RPS13 PE=1 SV=2;40S ribosomal protein S13 (Fragment) OS=Homo sapiens OX=9606 GN=RPS13 PE=1 SV=1	J3KMX5	RPS13	16.733	0.832	0.0225	0.142868	0.966137	1	0.687	FALSE	FALSE	FALSE	other	698510	758880	0	506160	0	0	440340	0	0	1	1	1	1	0	1	1	0	0
649	40S ribosomal protein S14 (Fragment) OS=Homo sapiens OX=9606 GN=RPS14 PE=1 SV=1;40S ribosomal protein S14 OS=Homo sapiens OX=9606 GN=RPS14 PE=1 SV=3;40S ribosomal protein S14 OS=Homo sapiens OX=9606 GN=RPS14 PE=1 SV=1	A0A2R8Y811	RPS14	16.159	0.0666	-0.174	0.87618	0.684768	1	0.623	FALSE	FALSE	FALSE	cyto	40487000	35387000	43137000	23375000	30158000	37428000	28278000	34679000	27835000	2	2	2	2	2	2	2	2	2
650	40S ribosomal protein S15a OS=Homo sapiens OX=9606 GN=RPS15A PE=1 SV=1;40S ribosomal protein S15a OS=Homo sapiens OX=9606 GN=RPS15A PE=1 SV=2;40S ribosomal protein S15a OS=Homo sapiens OX=9606 GN=RPS15A PE=1 SV=1;Uncharacterized protein (Fragment) OS=Homo	I3L3P7	RPS15A	11.477	-0.151	-0.342	0.721487	0.427782	1	0.529	FALSE	FALSE	FALSE	other	20025000	36879000	35225000	18635000	33052000	35194000	15420000	26818000	13404000	3	4	3	3	3	3	3	3	2
651	40S ribosomal protein S16 OS=Homo sapiens OX=9606 GN=RPS16 PE=1 SV=1;40S ribosomal protein S16 OS=Homo sapiens OX=9606 GN=RPS16 PE=1 SV=1;40S ribosomal protein S16 OS=Homo sapiens OX=9606 GN=RPS16 PE=1 SV=2;40S ribosomal protein S16 (Fragment) OS=Homo sapi	M0R3H0	RPS16	11.075	0.373	1.7	0.795615	0.255943	1	0.473	FALSE	FALSE	FALSE	cyto	11527000	7070800	9599100	0	5510000	7119500	12929000	0	4192000	1	1	1	1	2	1	2	0	1
652	40S ribosomal protein S17 OS=Homo sapiens OX=9606 GN=RPS17 PE=1 SV=1;40S ribosomal protein S17 OS=Homo sapiens OX=9606 GN=RPS17 PE=1 SV=1;Uncharacterized protein OS=Homo sapiens OX=9606 PE=3 SV=2;40S ribosomal protein S17 OS=Homo sapiens OX=9606 GN=RPS17 P	H0YN88	RPS17	15.919	0.36	2.57	0.721436	0.029219	1	0.15	FALSE	FALSE	FALSE	cyto	0	0	1874100	1116600	0	2301400	3922200	9153100	0	0	1	1	1	0	1	3	3	0
653	40S ribosomal protein S18 OS=Homo sapiens OX=9606 GN=RPS18 PE=1 SV=3;40S ribosomal protein S18 OS=Homo sapiens OX=9606 GN=RPS18 PE=1 SV=1;40S ribosomal protein S18 OS=Homo sapiens OX=9606 GN=RPS18 PE=1 SV=1	P62269	RPS18	17.718	0.839	0.324	0.602335	0.839236	1	0.661	FALSE	FALSE	FALSE	cyto	2940600	1978200	7572300	4492700	4066700	0	6204500	3344600	0	2	2	2	2	2	1	2	2	0
654	40S ribosomal protein S2 OS=Homo sapiens OX=9606 GN=RPS2 PE=1 SV=2;40S ribosomal protein S2 (Fragment) OS=Homo sapiens OX=9606 GN=RPS2 PE=1 SV=1;40S ribosomal protein S2 OS=Homo sapiens OX=9606 GN=RPS2 PE=1 SV=1;40S ribosomal protein S2 OS=Homo sapiens OX=	P15880	RPS2	31.324	0.0895	-0.163	0.830825	0.698961	1	0.627	FALSE	FALSE	FALSE	cyto	35214000	30793000	60541000	13627000	34223000	61500000	42220000	55874000	31753000	4	2	5	2	4	6	5	6	4
655	40S ribosomal protein S20 OS=Homo sapiens OX=9606 GN=RPS20 PE=1 SV=1;40S ribosomal protein S20 OS=Homo sapiens OX=9606 GN=RPS20 PE=1 SV=1;40S ribosomal protein S20 OS=Homo sapiens OX=9606 GN=RPS20 PE=1 SV=1	P60866	RPS20	13.373	0.539	1.24	0.616696	0.264498	1	0.476	FALSE	FALSE	FALSE	cyto	9429500	0	0	0	7099500	0	7227300	9216500	6141800	1	0	1	1	1	0	1	2	1
656	40S ribosomal protein S23 OS=Homo sapiens OX=9606 GN=RPS23 PE=1 SV=3;40S ribosomal protein S23 OS=Homo sapiens OX=9606 GN=RPS23 PE=1 SV=1	P62266	RPS23	15.807	0.092	-0.0749	0.823082	0.855634	1	0.665	FALSE	FALSE	FALSE	cyto	36849000	41493000	40337000	16693000	39140000	40406000	19812000	46055000	47633000	6	5	6	4	5	4	3	6	5
657	40S ribosomal protein S24 OS=Homo sapiens OX=9606 GN=RPS24 PE=1 SV=1;40S ribosomal protein S24 OS=Homo sapiens OX=9606 GN=RPS24 PE=1 SV=1;40S ribosomal protein S24 OS=Homo sapiens OX=9606 GN=RPS24 PE=1 SV=1;40S ribosomal protein S24 OS=Homo sapiens OX=9606	E7ETK0	RPS24	15.197	0.209	0.182	0.734001	0.767471	1	0.645	FALSE	FALSE	FALSE	cyto	6296300	23218000	21321000	7638600	36388000	17411000	4383800	62345000	8604100	1	3	2	2	3	2	1	3	2
658	40S ribosomal protein S26 OS=Homo sapiens OX=9606 GN=RPS26 PE=1 SV=3;Putative 40S ribosomal protein S26-like 1 OS=Homo sapiens OX=9606 GN=RPS26P11 PE=5 SV=1	P62854	RPS26	13.015	2.14	1.99	0.157209	0.183746	1	0.437	FALSE	FALSE	FALSE	cyto	16534000	13181000	30374000	16144000	25664000	19061000	14848000	28111000	12319000	2	1	3	3	4	2	3	3	2
659	40S ribosomal protein S27 OS=Homo sapiens OX=9606 GN=RPS27 PE=1 SV=3	P42677	RPS27	9.461	0.902	-0.934	0.635944	0.624146	1	0.604	FALSE	FALSE	FALSE	cyto	11397000	2403200	11015000	7304300	11321000	14578000	7114400	14566000	6115700	1	1	1	1	1	1	1	1	1
660	Ubiquitin-40S ribosomal protein S27a OS=Homo sapiens OX=9606 GN=RPS27A PE=1 SV=2;Ubiquitin-60S ribosomal protein L40 (Fragment) OS=Homo sapiens OX=9606 GN=UBA52 PE=1 SV=1;Polyubiquitin-B (Fragment) OS=Homo sapiens OX=9606 GN=UBB PE=1 SV=1;RPS27A protein OS	P62979	RPS27A	17.965	0.423	1.46	0.725698	0.245102	1	0.469	FALSE	FALSE	FALSE	other	0	0	0	0	0	0	0	16629000	0	0	0	0	0	0	0	0	1	0
661	40S ribosomal protein S28 OS=Homo sapiens OX=9606 GN=RPS28 PE=1 SV=1	P62857	RPS28	7.8409	0.668	1.05	0.48731	0.284289	1	0.483	FALSE	FALSE	FALSE	cyto	0	0	0	0	0	0	0	4109200	0	0	0	1	0	0	0	0	1	0
662	40S ribosomal protein S3 OS=Homo sapiens OX=9606 GN=RPS3 PE=1 SV=2;40S ribosomal protein S3 (Fragment) OS=Homo sapiens OX=9606 GN=RPS3 PE=1 SV=1;40S ribosomal protein S3 OS=Homo sapiens OX=9606 GN=RPS3 PE=1 SV=1;40S ribosomal protein S3 OS=Homo sapiens OX=	P23396	RPS3	26.688	0.112	-0.281	0.791738	0.510753	1	0.564	FALSE	FALSE	FALSE	cyto	150750000	156590000	197140000	80341000	148720000	211560000	80771000	167230000	106350000	10	10	9	9	11	11	9	10	9
663	40S ribosomal protein S3a (Fragment) OS=Homo sapiens OX=9606 GN=RPS3A PE=1 SV=1;40S ribosomal protein S3a OS=Homo sapiens OX=9606 GN=RPS3A PE=1 SV=1;40S ribosomal protein S3a OS=Homo sapiens OX=9606 GN=RPS3A PE=1 SV=2;40S ribosomal protein S3a (Fragment) O	D6RG13	RPS3A	25.608	-0.022	-0.238	0.957685	0.569483	1	0.586	FALSE	FALSE	FALSE	other	33988000	31349000	38035000	21573000	23012000	34173000	25525000	48634000	16377000	5	5	6	6	6	6	6	6	4
664	40S ribosomal protein S4, X isoform OS=Homo sapiens OX=9606 GN=RPS4X PE=1 SV=2	P62701	RPS4X	29.597	-0.136	-0.143	0.77303	0.762778	1	0.643	FALSE	FALSE	FALSE	other	37537000	30677000	40285000	20258000	18415000	27612000	31658000	16629000	19913000	5	6	6	6	6	6	6	5	5
665	40S ribosomal protein S5 OS=Homo sapiens OX=9606 GN=RPS5 PE=1 SV=1;40S ribosomal protein S5 (Fragment) OS=Homo sapiens OX=9606 GN=RPS5 PE=1 SV=1;40S ribosomal protein S5 OS=Homo sapiens OX=9606 GN=RPS5 PE=1 SV=1;40S ribosomal protein S5 OS=Homo sapiens OX=	M0QZN2	RPS5	14.763	1.18	1.62	0.323999	0.189333	1	0.441	FALSE	FALSE	FALSE	cyto	0	3325700	0	0	3654400	5385600	5237500	4332500	0	1	1	0	0	1	1	1	2	0
666	40S ribosomal protein S6 OS=Homo sapiens OX=9606 GN=RPS6 PE=1 SV=1;40S ribosomal protein S6 OS=Homo sapiens OX=9606 GN=RPS6 PE=1 SV=1;40S ribosomal protein S6 OS=Homo sapiens OX=9606 GN=RPS6 PE=1 SV=1	P62753	RPS6	28.68	0.0276	-0.21	0.948364	0.624663	1	0.605	FALSE	FALSE	FALSE	cyto	52336000	50591000	69192000	25170000	43819000	55952000	27634000	67222000	39207000	4	4	3	3	3	3	3	4	3
667	40S ribosomal protein S7 OS=Homo sapiens OX=9606 GN=RPS7 PE=1 SV=1;40S ribosomal protein S7 (Fragment) OS=Homo sapiens OX=9606 GN=RPS7 PE=1 SV=1;40S ribosomal protein S7 OS=Homo sapiens OX=9606 GN=RPS7 PE=1 SV=1	P62081	RPS7	22.127	2	1.52	0.0674221	0.147567	1	0.41	FALSE	FALSE	FALSE	cyto	22095000	18920000	19592000	14966000	22329000	31126000	14855000	36009000	13813000	1	3	3	2	2	3	2	2	2
668	40S ribosomal protein S8 OS=Homo sapiens OX=9606 GN=RPS8 PE=1 SV=2;40S ribosomal protein S8 OS=Homo sapiens OX=9606 GN=RPS8 PE=1 SV=1	P62241	RPS8	24.205	1.07	1.37	0.294001	0.189957	1	0.441	FALSE	FALSE	FALSE	cyto	29422000	43820000	38350000	21842000	206970000	40622000	25888000	639200000	35582000	5	6	3	3	6	4	4	9	4
669	40S ribosomal protein S9 OS=Homo sapiens OX=9606 GN=RPS9 PE=1 SV=1;40S ribosomal protein S9 OS=Homo sapiens OX=9606 GN=RPS9 PE=1 SV=3;40S ribosomal protein S9 OS=Homo sapiens OX=9606 GN=RPS9 PE=1 SV=1;40S ribosomal protein S9 OS=Homo sapiens OX=9606 GN=RPS	A0A024R4M0	RPS9	22.591	-1.3	0.0347	0.253232	0.974694	1	0.689	FALSE	FALSE	FALSE	other	14958000	16921000	20608000	5016800	18701000	17257000	13602000	32244000	18194000	2	3	3	1	5	2	3	3	3
670	40S ribosomal protein SA (Fragment) OS=Homo sapiens OX=9606 GN=RPSA PE=1 SV=2;40S ribosomal protein SA (Fragment) OS=Homo sapiens OX=9606 GN=RPSA PE=1 SV=8;40S ribosomal protein SA OS=Homo sapiens OX=9606 GN=RPSA PE=1 SV=1;40S ribosomal protein SA OS=Homo	F8WD59	RPSA	12.647	-0.769	-0.884	0.447006	0.384406	1	0.515	FALSE	FALSE	FALSE	cyto	2222000	7408600	3540200	0	0	0	0	0	0	1	2	2	0	1	0	0	1	0
671	Ribonucleoside-diphosphate reductase large subunit OS=Homo sapiens OX=9606 GN=RRM1 PE=1 SV=1;Ribonucleoside-diphosphate reductase large subunit OS=Homo sapiens OX=9606 GN=RRM1 PE=1 SV=1	P23921	RRM1	90.069	-3.41	-1.96	0.0815394	0.284851	1	0.483	FALSE	FALSE	FALSE	cyto	23452000	28298000	1822400	986890	904850	2136400	3411600	9793800	0	6	7	1	1	1	1	3	4	0
672	RRP12-like protein (Fragment) OS=Homo sapiens OX=9606 GN=RRP12 PE=1 SV=1;RRP12-like protein (Fragment) OS=Homo sapiens OX=9606 GN=RRP12 PE=1 SV=1;RRP12-like protein (Fragment) OS=Homo sapiens OX=9606 GN=RRP12 PE=1 SV=6;RRP12-like protein OS=Homo sapiens OX	A0A087WYW2	RRP12	3.44	0.574	0.454	0.545886	0.631202	1	0.607	FALSE	FALSE	FALSE	nuc	0	0	289830	0	204610	0	0	0	0	0	0	1	0	1	0	0	0	0
673	Ribosomal RNA processing protein 1 homolog B OS=Homo sapiens OX=9606 GN=RRP1B PE=1 SV=3	Q14684	RRP1B	84.427	0.752	0.865	0.51772	0.458765	1	0.542	FALSE	FALSE	FALSE	other	0	0	0	0	0	0	0	7232400	1081100	0	0	0	0	0	0	0	3	1
674	Ribosomal L1 domain-containing protein 1 (Fragment) OS=Homo sapiens OX=9606 GN=RSL1D1 PE=1 SV=1;Ribosomal L1 domain-containing protein 1 OS=Homo sapiens OX=9606 GN=RSL1D1 PE=1 SV=3;Ribosomal L1 domain-containing protein 1 (Fragment) OS=Homo sapiens OX=9606	J3QSV6	RSL1D1	48.208	0.981	2.18	0.512834	0.165058	1	0.424	FALSE	FALSE	FALSE	other	0	0	0	0	0	0	0	27748000	0	0	0	0	0	0	0	0	5	0
675	Replication termination factor 2 (Fragment) OS=Homo sapiens OX=9606 GN=RTF2 PE=1 SV=1;Replication termination factor 2 OS=Homo sapiens OX=9606 GN=RTF2 PE=1 SV=1;Protein RTF2 homolog OS=Homo sapiens OX=9606 GN=RTFDC1 PE=1 SV=3;Replication termination factor	A2A2L5	RTFDC1	31.151	0.72	3.25	0.595269	0.036263	1	0.184	FALSE	FALSE	FALSE	other	0	0	0	0	0	0	6793200	18600000	6300700	0	0	0	0	0	0	3	3	2
65	Reticulon-3 OS=Homo sapiens OX=9606 GN=RTN3 PE=1 SV=2	O95197	RTN3	112.61	-2.6	-3.06	0.00981069	0.00410672	1	0.00993	FALSE	TRUE	TRUE	other	9268200	10766000	10097000	5125200	3659700	4048500	5446000	4619900	4134200	1	1	1	1	1	1	1	1	1
676	Reticulon OS=Homo sapiens OX=9606 GN=RTN4 PE=1 SV=1;Reticulon-4 OS=Homo sapiens OX=9606 GN=RTN4 PE=1 SV=2	F8W914	RTN4	37.144	-1.08	-1.73	0.434471	0.223312	1	0.459	FALSE	FALSE	FALSE	other	4320300	23396000	6069800	0	0	0	0	0	0	1	3	1	0	0	0	0	0	0
677	Protein S100-A11 OS=Homo sapiens OX=9606 GN=S100A11 PE=1 SV=2	P31949	S100A11	11.74	0.747	1.21	0.520233	0.306408	1	0.489	FALSE	FALSE	FALSE	other	0	0	0	0	3413700	0	0	8814200	3222900	0	1	0	0	1	0	1	2	1
678	Protein S100-A7 OS=Homo sapiens OX=9606 GN=S100A7 PE=1 SV=4;Protein S100-A7A OS=Homo sapiens OX=9606 GN=S100A7A PE=1 SV=3	P31151	S100A7	11.471	0.938	2.35	0.600839	0.20805	1	0.452	FALSE	FALSE	FALSE	cyto	0	0	0	0	0	0	0	0	58265000	0	0	0	0	0	0	0	0	4
679	Protein S100-A8 OS=Homo sapiens OX=9606 GN=S100A8 PE=1 SV=1	P05109	S100A8	10.834	0.678	3.01	0.758196	0.194977	1	0.444	FALSE	FALSE	FALSE	other	0	0	0	0	0	0	0	0	172780000	0	0	0	0	0	0	0	0	2
680	Protein S100-A9 OS=Homo sapiens OX=9606 GN=S100A9 PE=1 SV=1	P06702	S100A9	13.242	0.754	3.51	0.747304	0.158359	1	0.419	FALSE	FALSE	FALSE	other	0	0	0	0	0	0	0	0	346290000	0	0	0	0	0	0	0	0	5
681	Protein S100-P OS=Homo sapiens OX=9606 GN=S100P PE=1 SV=2	P25815	S100P	10.4	0.525	1.22	0.622792	0.269526	1	0.478	FALSE	FALSE	FALSE	nuc	0	0	0	0	0	0	0	0	3731400	0	0	0	0	0	0	0	0	1
682	Scaffold attachment factor B1 OS=Homo sapiens OX=9606 GN=SAFB PE=1 SV=4;Scaffold attachment factor B2 OS=Homo sapiens OX=9606 GN=SAFB2 PE=1 SV=1	Q15424	SAFB	102.64	0.68	0.557	0.420958	0.507463	1	0.563	FALSE	FALSE	FALSE	nuc	0	0	0	0	0	0	0	2032500	0	0	0	0	0	0	0	0	1	0
683	U4/U6.U5 tri-snRNP-associated protein 1 OS=Homo sapiens OX=9606 GN=SART1 PE=1 SV=1;U4/U6.U5 tri-snRNP-associated protein 1 OS=Homo sapiens OX=9606 GN=SART1 PE=1 SV=1	E9PQI8	SART1	17.541	1.18	0.624	0.137725	0.409856	1	0.523	FALSE	FALSE	FALSE	nuc	0	0	0	0	0	0	1857700	2116500	0	0	0	0	0	0	0	1	1	0
684	Protein SCAF11 OS=Homo sapiens OX=9606 GN=SCAF11 PE=1 SV=1;Protein SCAF11 OS=Homo sapiens OX=9606 GN=SCAF11 PE=1 SV=2;Protein SCAF11 OS=Homo sapiens OX=9606 GN=SCAF11 PE=1 SV=1	F8VXG7	SCAF11	142.6	0.523	1.07	0.584858	0.276862	1	0.48	FALSE	FALSE	FALSE	nuc	0	1406200	0	0	0	0	3508900	2958400	2216800	0	1	0	0	0	0	4	3	2
685	Saccharopine dehydrogenase-like oxidoreductase OS=Homo sapiens OX=9606 GN=SCCPDH PE=1 SV=1	Q8NBX0	SCCPDH	47.151	0.23	-0.307	0.72008	0.633714	1	0.607	FALSE	FALSE	FALSE	other	1415700	0	1511600	0	0	0	0	0	0	1	0	1	0	0	0	0	0	0
686	Acyl-CoA desaturase OS=Homo sapiens OX=9606 GN=SCD PE=1 SV=2	O00767	SCD	41.522	-1.31	-2.95	0.307374	0.0392582	1	0.197	FALSE	FALSE	FALSE	other	17509000	12329000	18328000	0	6817500	11850000	9386600	0	2782800	2	2	3	0	2	3	2	0	1
687	N-terminal kinase-like protein OS=Homo sapiens OX=9606 GN=SCYL1 PE=1 SV=1	E9PPN3	SCYL1	73.684	1.61	0.232	0.224484	0.853907	1	0.665	FALSE	FALSE	FALSE	cyto	0	0	0	8177000	0	0	0	0	0	0	0	0	1	0	0	0	0	0
688	Signal peptidase complex catalytic subunit SEC11 OS=Homo sapiens OX=9606 GN=SEC11A PE=1 SV=1;Signal peptidase complex catalytic subunit SEC11A OS=Homo sapiens OX=9606 GN=SEC11A PE=1 SV=1;Signal peptidase complex catalytic subunit SEC11 (Fragment) OS=Homo s	H0YNG3	SEC11A	18.651	-0.209	-0.253	0.829868	0.794673	1	0.651	FALSE	FALSE	FALSE	nuc	3348100	0	0	0	0	0	0	0	0	1	0	0	0	0	0	1	0	0
689	Protein transport protein sec16 (Fragment) OS=Homo sapiens OX=9606 GN=SEC16A PE=1 SV=1;Protein transport protein sec16 OS=Homo sapiens OX=9606 GN=SEC16A PE=1 SV=1;Protein transport protein sec16 OS=Homo sapiens OX=9606 GN=SEC16A PE=1 SV=1;Protein transport	X6RGP5	SEC16A	115.22	1.31	0.35	0.0783138	0.605543	1	0.598	FALSE	FALSE	FALSE	other	275460	391720	0	0	0	0	0	0	0	1	1	0	0	0	0	0	0	0
690	Vesicle-trafficking protein SEC22b (Fragment) OS=Homo sapiens OX=9606 GN=SEC22B PE=1 SV=1;Vesicle-trafficking protein SEC22b OS=Homo sapiens OX=9606 GN=SEC22B PE=1 SV=4	A0A087X1A9	SEC22B	8.7819	0.951	-0.00999	0.21354	0.989048	1	0.691	FALSE	FALSE	FALSE	other	0	1960500	0	1532700	0	0	0	0	0	0	1	0	1	0	0	0	0	0
691	Protein transport protein SEC23 OS=Homo sapiens OX=9606 GN=SEC23A PE=1 SV=1;Protein transport protein Sec23A OS=Homo sapiens OX=9606 GN=SEC23A PE=1 SV=2	F5H365	SEC23A	82.968	-0.257	-1.3	0.772611	0.16668	1	0.426	FALSE	FALSE	FALSE	nuc	2236700	4884000	4549100	0	0	0	0	0	0	2	3	1	0	0	0	0	0	0
692	Protein transport protein Sec24C OS=Homo sapiens OX=9606 GN=SEC24C PE=1 SV=1;Protein transport protein Sec24C OS=Homo sapiens OX=9606 GN=SEC24C PE=1 SV=3	G5EA31	SEC24C	111.98	-0.128	-0.453	0.875827	0.584094	1	0.591	FALSE	FALSE	FALSE	other	0	0	1959700	0	0	0	0	0	0	0	0	1	0	0	0	0	1	0
693	Protein transport protein Sec31A (Fragment) OS=Homo sapiens OX=9606 GN=SEC31A PE=1 SV=1;Protein transport protein Sec31A OS=Homo sapiens OX=9606 GN=SEC31A PE=1 SV=1;Protein transport protein Sec31A OS=Homo sapiens OX=9606 GN=SEC31A PE=1 SV=1;Protein transp	H0YAB3	SEC31A	48.871	-0.0254	-0.47	0.976999	0.597765	1	0.596	FALSE	FALSE	FALSE	cyto	387380	975710	725000	258030	386920	319870	0	0	0	1	1	1	1	1	1	0	0	0
694	cDNA FLJ59739, highly similar to Protein transport protein Sec61 subunit alpha isoform 1 OS=Homo sapiens OX=9606 GN=SEC61A1 PE=1 SV=1;Protein transport protein Sec61 subunit alpha isoform 1 OS=Homo sapiens OX=9606 GN=SEC61A1 PE=1 SV=2	B4DR61	SEC61A1	52.949	-0.573	-2.67	0.742918	0.150976	1	0.413	FALSE	FALSE	FALSE	other	12003000	4000700	18465000	2789400	3780600	17911000	3133300	4165500	4005200	2	1	3	1	1	3	1	1	1
695	Protein transport protein Sec61 subunit beta OS=Homo sapiens OX=9606 GN=SEC61B PE=1 SV=2	P60468	SEC61B	9.9743	-1.93	-1.44	0.217637	0.345723	1	0.501	FALSE	FALSE	FALSE	other	16956000	17172000	15947000	6623100	4233100	9640600	11742000	7397700	10994000	2	2	2	2	2	2	2	2	3
696	Protein transport protein Sec61 subunit gamma OS=Homo sapiens OX=9606 GN=SEC61G PE=1 SV=1	P60059	SEC61G	7.7412	1.64	0.437	0.0731566	0.599719	1	0.596	FALSE	FALSE	FALSE	other	0	0	2794700	0	0	2259600	0	0	0	0	0	1	0	0	1	0	0	0
697	Sentrin-specific protease 3 OS=Homo sapiens OX=9606 GN=SENP3 PE=1 SV=2	Q9H4L4	SENP3	65.009	1.1	1.24	0.28437	0.231609	1	0.463	FALSE	FALSE	FALSE	nuc	0	0	0	0	0	0	3271500	0	2391300	0	0	0	0	0	0	1	0	1
698	Plasminogen activator inhibitor 1 RNA-binding protein OS=Homo sapiens OX=9606 GN=SERBP1 PE=1 SV=2	Q8NC51	SERBP1	44.965	-0.54	-1.77	0.658272	0.169428	1	0.428	FALSE	FALSE	FALSE	cyto	13090000	18228000	8700500	2525200	3734900	4909900	4777700	24177000	1314500	5	6	3	2	4	4	3	6	1
699	Serpin B4 (Fragment) OS=Homo sapiens OX=9606 GN=SERPINB4 PE=1 SV=1;Serpin B4 OS=Homo sapiens OX=9606 GN=SERPINB4 PE=1 SV=2;Serpin B3 OS=Homo sapiens OX=9606 GN=SERPINB3 PE=1 SV=2	H0Y5H9	SERPINB4	42.388	0.433	1.18	0.58701	0.161286	1	0.422	FALSE	FALSE	FALSE	other	0	0	0	0	0	0	0	0	2271700	0	0	0	0	0	0	0	0	1
700	Serpin H1 OS=Homo sapiens OX=9606 GN=SERPINH1 PE=1 SV=2;Serpin H1 (Fragment) OS=Homo sapiens OX=9606 GN=SERPINH1 PE=1 SV=1;Serpin H1 OS=Homo sapiens OX=9606 GN=SERPINH1 PE=1 SV=1;Serpin H1 OS=Homo sapiens OX=9606 GN=SERPINH1 PE=1 SV=1	P50454	SERPINH1	46.44	0.00112	-0.128	0.997944	0.769268	1	0.645	FALSE	FALSE	FALSE	other	58305000	62368000	65937000	25552000	27924000	47172000	41543000	45308000	36786000	9	9	9	7	6	8	8	8	6
701	Splicing factor 1 OS=Homo sapiens OX=9606 GN=SF1 PE=1 SV=4	Q15637	SF1	68.329	0.612	1.17	0.559644	0.278916	1	0.481	FALSE	FALSE	FALSE	nuc	0	0	0	0	0	0	1172400	6192400	1433600	0	0	0	0	0	0	1	3	1
702	Splicing factor 3A subunit 1 OS=Homo sapiens OX=9606 GN=SF3A1 PE=1 SV=1	Q15459	SF3A1	88.885	1.53	2.38	0.190286	0.0560744	1	0.258	FALSE	FALSE	FALSE	nuc	0	2056800	5136200	667420	2227800	5103800	4092000	7432600	4633200	0	1	3	1	2	4	3	4	3
703	Splicing factor 3A subunit 3 OS=Homo sapiens OX=9606 GN=SF3A3 PE=1 SV=1	Q12874	SF3A3	58.848	0.86	-0.213	0.271951	0.778194	1	0.647	FALSE	FALSE	FALSE	nuc	0	0	0	0	0	994000	0	0	0	0	0	0	0	0	1	0	0	0
66	Splicing factor 3B subunit 1 OS=Homo sapiens OX=9606 GN=SF3B1 PE=1 SV=3	O75533	SF3B1	145.83	0.547	4.81	0.422722	6.18734e-05	1	2.68e-08	FALSE	TRUE	TRUE	nuc	0	0	0	0	0	0	12873000	12069000	6397400	0	0	0	0	0	0	8	4	3
704	Splicing factor 3B subunit 2 (Fragment) OS=Homo sapiens OX=9606 GN=SF3B2 PE=1 SV=1;Splicing factor 3B subunit 2 (Fragment) OS=Homo sapiens OX=9606 GN=SF3B2 PE=1 SV=8;Splicing factor 3B subunit 2 (Fragment) OS=Homo sapiens OX=9606 GN=SF3B2 PE=1 SV=1;Splicin	E9PJT3	SF3B2	29.134	0.521	0.716	0.577779	0.447636	1	0.536	FALSE	FALSE	FALSE	nuc	0	0	0	0	0	0	2431700	0	0	0	0	0	0	0	0	1	0	1
67	Splicing factor, proline- and glutamine-rich OS=Homo sapiens OX=9606 GN=SFPQ PE=1 SV=2	P23246	SFPQ	76.149	0.677	6.97	0.21469	5.0677e-07	1	1.11e-14	FALSE	TRUE	TRUE	nuc	0	0	0	1020200	0	871850	44810000	84780000	51792000	0	0	0	1	0	1	11	12	8
705	Sideroflexin-1 OS=Homo sapiens OX=9606 GN=SFXN1 PE=1 SV=4;Sideroflexin-1 OS=Homo sapiens OX=9606 GN=SFXN1 PE=1 SV=1;Sideroflexin-1 (Fragment) OS=Homo sapiens OX=9606 GN=SFXN1 PE=1 SV=1;Sideroflexin-1 OS=Homo sapiens OX=9606 GN=SFXN1 PE=1 SV=1;Sideroflexin-	Q9H9B4	SFXN1	35.619	1.17	0.138	0.145834	0.854927	1	0.665	FALSE	FALSE	FALSE	mito	1270300	1097100	1873700	650140	680890	3591200	0	0	662660	1	1	1	1	1	2	0	0	1
706	Protein Shroom3 OS=Homo sapiens OX=9606 GN=SHROOM3 PE=1 SV=1;Protein Shroom3 OS=Homo sapiens OX=9606 GN=SHROOM3 PE=1 SV=2	A0A2R8Y5P9	SHROOM3	208.05	0.334	3.68	0.87715	0.115606	1	0.376	FALSE	FALSE	FALSE	other	358810000	315480000	277740000	256740000	211370000	256260000	223220000	190410000	275010000	1	1	1	1	1	1	1	1	1
707	S-phase kinase-associated protein 1 OS=Homo sapiens OX=9606 GN=SKP1 PE=1 SV=1;S-phase kinase-associated protein 1 OS=Homo sapiens OX=9606 GN=SKP1 PE=1 SV=2	E5RJR5	SKP1	18.72	0.357	1.15	0.726477	0.274232	1	0.479	FALSE	FALSE	FALSE	nuc	5471900	0	4437900	0	0	0	0	5611700	0	1	1	1	0	0	0	1	1	0
708	Monocarboxylate transporter 1 OS=Homo sapiens OX=9606 GN=SLC16A1 PE=1 SV=3	P53985	SLC16A1	53.944	-2.09	-1.35	0.15903	0.344468	1	0.501	FALSE	FALSE	FALSE	other	10293000	0	9189800	3026400	0	2509300	3618000	0	5638500	2	0	2	1	0	1	2	0	2
709	Monocarboxylate transporter 4 OS=Homo sapiens OX=9606 GN=SLC16A3 PE=1 SV=1	O15427	SLC16A3	49.469	1.04	0.14	0.260144	0.87478	1	0.669	FALSE	FALSE	FALSE	other	0	0	0	0	0	1996600	0	0	0	0	0	0	0	0	1	0	0	0
710	Neutral amino acid transporter B(0) OS=Homo sapiens OX=9606 GN=SLC1A5 PE=1 SV=2;Amino acid transporter OS=Homo sapiens OX=9606 GN=SLC1A5 PE=1 SV=1	Q15758	SLC1A5	56.598	-0.793	-2.39	0.35998	0.0184227	1	0.0932	FALSE	FALSE	FALSE	other	2150100	4772900	7269100	5356600	1110000	4683200	2540300	0	0	1	2	2	2	1	2	1	0	0
711	Mitochondrial dicarboxylate carrier OS=Homo sapiens OX=9606 GN=SLC25A10 PE=1 SV=1;Mitochondrial dicarboxylate carrier OS=Homo sapiens OX=9606 GN=SLC25A10 PE=1 SV=2	F6RGN5	SLC25A10	43.611	1.09	1.52	0.291976	0.154057	1	0.416	FALSE	FALSE	FALSE	mito	5231700	3019600	5715400	2611300	2974000	5788900	0	0	4679800	1	1	1	1	1	1	1	0	1
712	Mitochondrial 2-oxoglutarate/malate carrier protein (Fragment) OS=Homo sapiens OX=9606 GN=SLC25A11 PE=1 SV=1;Mitochondrial 2-oxoglutarate/malate carrier protein OS=Homo sapiens OX=9606 GN=SLC25A11 PE=1 SV=3	I3L1P8	SLC25A11	32.182	0.0513	-0.372	0.949753	0.650007	1	0.612	FALSE	FALSE	FALSE	other	6974400	0	2740200	0	0	0	0	0	0	1	0	1	0	0	0	0	0	0
713	Calcium-binding mitochondrial carrier protein Aralar2 OS=Homo sapiens OX=9606 GN=SLC25A13 PE=1 SV=2	Q9UJS0	SLC25A13	74.175	2.35	0.29	0.0340128	0.76262	1	0.643	FALSE	FALSE	FALSE	mito	3229400	0	0	2255600	0	7273900	1408200	0	2632300	1	1	1	1	1	3	1	1	2
714	Phosphate carrier protein, mitochondrial OS=Homo sapiens OX=9606 GN=SLC25A3 PE=1 SV=1	F8VVM2	SLC25A3	36.161	-0.731	-1.16	0.401391	0.196005	1	0.445	FALSE	FALSE	FALSE	mito	0	6109000	0	0	0	0	0	0	0	0	1	0	0	0	0	0	0	0
68	Phosphate carrier protein, mitochondrial OS=Homo sapiens OX=9606 GN=SLC25A3 PE=1 SV=2	Q00325	SLC25A3.1	40.094	1.62	-4.41	0.213545	0.00597369	1	0.0195	FALSE	TRUE	TRUE	other	23226000	27484000	63994000	25474000	25670000	26590000	10858000	15957000	10782000	0	0	1	0	0	1	0	0	0
715	ADP/ATP translocase 1 OS=Homo sapiens OX=9606 GN=SLC25A4 PE=1 SV=4;ADP/ATP translocase 1 OS=Homo sapiens OX=9606 GN=SLC25A4 PE=1 SV=1	P12235	SLC25A4	33.064	0.304	-0.0803	0.474147	0.847623	1	0.663	FALSE	FALSE	FALSE	mito	36209000	17148000	43984000	25248000	34048000	39830000	13566000	24863000	21173000	2	1	3	1	1	2	3	1	2
716	Solute carrier family 25 member 44 OS=Homo sapiens OX=9606 GN=SLC25A44 PE=1 SV=3;Solute carrier family 25 member 44 OS=Homo sapiens OX=9606 GN=SLC25A44 PE=2 SV=1	E9PGQ0	SLC25A44	36.316	-0.832	-1.03	0.405737	0.308814	1	0.49	FALSE	FALSE	FALSE	mito	0	7656800	0	0	0	0	0	0	0	0	1	0	0	0	0	0	0	0
69	Solute carrier family 25 member 46 OS=Homo sapiens OX=9606 GN=SLC25A46 PE=1 SV=1;Solute carrier family 25 member 46 OS=Homo sapiens OX=9606 GN=SLC25A46 PE=1 SV=1	Q96AG3	SLC25A46	46.173	-3.14	-3.37	0.000175959	0.000106198	1	3.07e-07	FALSE	TRUE	TRUE	mito	5864800	8854400	7089200	1046700	0	0	0	0	0	2	2	2	1	1	0	0	0	0
717	ADP/ATP translocase 2 OS=Homo sapiens OX=9606 GN=SLC25A5 PE=1 SV=7	P05141	SLC25A5	32.852	0.0774	-0.235	0.85133	0.573367	1	0.587	FALSE	FALSE	FALSE	mito	240340000	268350000	296740000	154170000	242000000	287460000	172180000	259100000	213740000	5	5	5	5	5	5	5	4	4
718	ADP/ATP translocase 3 OS=Homo sapiens OX=9606 GN=SLC25A6 PE=1 SV=4	P12236	SLC25A6	32.866	2.26	1.41	0.221865	0.432389	1	0.53	FALSE	FALSE	FALSE	mito	16358000	16403000	15023000	11036000	15024000	16195000	14781000	17634000	10408000	1	1	1	1	2	1	2	2	1
719	Solute carrier family 2, facilitated glucose transporter member 1 OS=Homo sapiens OX=9606 GN=SLC2A1 PE=1 SV=2	P11166	SLC2A1	54.083	1.21	0.013	0.0940053	0.984357	1	0.691	FALSE	FALSE	FALSE	other	1603500	0	3518200	1277300	0	2038600	0	0	0	1	0	1	1	0	1	0	0	0
720	Zinc transporter ZIP14 (Fragment) OS=Homo sapiens OX=9606 GN=SLC39A14 PE=1 SV=1;Zinc transporter ZIP14 (Fragment) OS=Homo sapiens OX=9606 GN=SLC39A14 PE=1 SV=1;Zinc transporter ZIP14 (Fragment) OS=Homo sapiens OX=9606 GN=SLC39A14 PE=1 SV=1;Zinc transporter	E5RFZ8	SLC39A14	9.632	0.546	0.0812	0.522411	0.923315	1	0.679	FALSE	FALSE	FALSE	other	1685600	0	0	0	0	0	0	0	0	1	0	0	0	0	0	0	0	0
721	Zinc transporter SLC39A7 OS=Homo sapiens OX=9606 GN=SLC39A7 PE=1 SV=2	Q92504	SLC39A7	50.117	-0.386	0.0394	0.600852	0.957039	1	0.686	FALSE	FALSE	FALSE	other	1820400	2555600	1174300	590810	881190	1940200	1485600	1145900	1220500	1	1	1	1	1	1	1	1	1
722	4F2 cell-surface antigen heavy chain OS=Homo sapiens OX=9606 GN=SLC3A2 PE=1 SV=1;4F2 cell-surface antigen heavy chain OS=Homo sapiens OX=9606 GN=SLC3A2 PE=1 SV=1;4F2 cell-surface antigen heavy chain OS=Homo sapiens OX=9606 GN=SLC3A2 PE=1 SV=3	F5GZS6	SLC3A2	64.872	-0.341	-0.42	0.529653	0.4425	1	0.534	FALSE	FALSE	FALSE	nuc	74621000	47734000	84998000	36704000	17933000	57682000	48457000	28602000	39435000	11	8	10	10	6	9	9	6	8
723	Electroneutral sodium bicarbonate exchanger 1 OS=Homo sapiens OX=9606 GN=SLC4A8 PE=1 SV=1	Q2Y0W8	SLC4A8	122.94	-1.95	-2.79	0.403412	0.240939	1	0.467	FALSE	FALSE	FALSE	other	240980000	0	0	0	0	0	0	0	0	1	0	0	0	0	0	0	0	0
724	Large neutral amino acids transporter small subunit 1 OS=Homo sapiens OX=9606 GN=SLC7A5 PE=1 SV=2	Q01650	SLC7A5	55.01	-1.66	-1.76	0.269715	0.244364	1	0.468	FALSE	FALSE	FALSE	cyto	7443100	7310000	31696000	4471300	0	6741000	3659500	3999100	0	1	3	4	1	0	2	1	2	2
725	SAFB-like transcription modulator OS=Homo sapiens OX=9606 GN=SLTM PE=1 SV=2;SAFB-like transcription modulator (Fragment) OS=Homo sapiens OX=9606 GN=SLTM PE=1 SV=1;SAFB-like transcription modulator (Fragment) OS=Homo sapiens OX=9606 GN=SLTM PE=1 SV=1	Q9NWH9	SLTM	117.15	0.936	0.29	0.285762	0.732839	1	0.636	FALSE	FALSE	FALSE	nuc	0	1163000	488760	0	2213400	666910	0	0	650520	0	1	1	0	1	1	0	0	2
726	SWI/SNF-related matrix-associated actin-dependent regulator of chromatin subfamily A member 5 OS=Homo sapiens OX=9606 GN=SMARCA5 PE=1 SV=1	O60264	SMARCA5	121.9	-0.404	0.0565	0.754394	0.965034	1	0.687	FALSE	FALSE	FALSE	nuc	0	1012600	3093000	353670	879710	1128100	0	5036700	6670000	1	1	2	1	1	1	2	5	3
727	SWI/SNF complex subunit SMARCC1 OS=Homo sapiens OX=9606 GN=SMARCC1 PE=1 SV=3;SWI/SNF complex subunit SMARCC1 OS=Homo sapiens OX=9606 GN=SMARCC1 PE=1 SV=1	Q92922	SMARCC1	122.87	0.677	1.54	0.535035	0.178707	1	0.434	FALSE	FALSE	FALSE	nuc	642060	0	0	0	157450	0	3926500	0	1079500	1	0	0	0	1	1	4	0	1
728	Structural maintenance of chromosomes protein 3 OS=Homo sapiens OX=9606 GN=SMC3 PE=1 SV=2	Q9UQE7	SMC3	141.54	1.01	0.807	0.202063	0.298205	1	0.487	FALSE	FALSE	FALSE	nuc	0	331580	0	0	309630	0	0	559020	512760	0	1	0	0	1	0	0	2	1
729	Small nuclear ribonucleoprotein-associated protein N (Fragment) OS=Homo sapiens OX=9606 GN=SNRPN PE=4 SV=1;Small nuclear ribonucleoprotein-associated proteins B and B OS=Homo sapiens OX=9606 GN=SNRPB PE=4 SV=1;Small nuclear ribonucleoprotein-associated pr	J3KRY3	SNRPN	6.9603	0.792	0.433	0.33515	0.591185	1	0.594	FALSE	FALSE	FALSE	nuc	0	0	0	0	0	0	0	1346100	0	0	0	0	0	0	0	0	1	0
730	Sperm-associated antigen 7 OS=Homo sapiens OX=9606 GN=SPAG7 PE=1 SV=1;Sperm-associated antigen 7 OS=Homo sapiens OX=9606 GN=SPAG7 PE=1 SV=1;Sperm-associated antigen 7 OS=Homo sapiens OX=9606 GN=SPAG7 PE=1 SV=2	I3L0X5	SPAG7	20.083	0.439	0.559	0.489468	0.383616	1	0.514	FALSE	FALSE	FALSE	nuc	0	0	0	0	0	0	896480	0	0	0	0	0	0	0	0	1	0	0
731	Signal peptidase complex subunit 1 OS=Homo sapiens OX=9606 GN=SPCS1 PE=1 SV=4	Q9Y6A9	SPCS1	11.805	1.41	1.01	0.0948164	0.212875	1	0.454	FALSE	FALSE	FALSE	other	2980300	0	0	0	0	0	1946200	0	0	1	0	0	0	0	0	1	0	0
732	Signal peptidase complex subunit 2 OS=Homo sapiens OX=9606 GN=SPCS2 PE=1 SV=1;Signal peptidase complex subunit 2 OS=Homo sapiens OX=9606 GN=SPCS2 PE=1 SV=1;Signal peptidase complex subunit 2 OS=Homo sapiens OX=9606 GN=SPCS2 PE=1 SV=1;Signal peptidase compl	E9PRB9	SPCS2	10.163	-0.231	-0.0317	0.7998	0.972251	1	0.688	FALSE	FALSE	FALSE	nuc	2875500	0	0	0	0	0	0	0	0	2	0	0	0	0	0	0	0	0
733	Cornifin-A OS=Homo sapiens OX=9606 GN=SPRR1A PE=1 SV=2	P35321	SPRR1A	9.8774	0.65	0.744	0.502879	0.445284	1	0.535	FALSE	FALSE	FALSE	other	0	0	0	0	0	0	0	0	1935100	0	0	0	0	0	0	0	0	1
734	Cornifin-B OS=Homo sapiens OX=9606 GN=SPRR1B PE=1 SV=2	P22528	SPRR1B	9.8875	0.332	1.69	0.831982	0.296875	1	0.487	FALSE	FALSE	FALSE	other	0	0	0	0	0	0	0	0	24643000	0	0	0	0	0	0	0	0	1
735	Small proline-rich protein 2A OS=Homo sapiens OX=9606 GN=SPRR2A PE=1 SV=1	P35326	SPRR2A	7.9653	0.309	0.89	0.753062	0.375029	1	0.511	FALSE	FALSE	FALSE	other	0	0	0	0	0	0	0	0	2941300	0	0	0	0	0	0	0	0	1
736	Small proline-rich protein 2D OS=Homo sapiens OX=9606 GN=SPRR2D PE=2 SV=2;Small proline-rich protein 2B OS=Homo sapiens OX=9606 GN=SPRR2B PE=2 SV=1	P22532	SPRR2D	7.9053	0.628	2.67	0.776298	0.245756	1	0.469	FALSE	FALSE	FALSE	other	0	0	0	0	0	0	0	0	189450000	0	0	0	0	0	0	0	0	2
737	Small proline-rich protein 2E OS=Homo sapiens OX=9606 GN=SPRR2E PE=2 SV=2;Small proline-rich protein 2F OS=Homo sapiens OX=9606 GN=SPRR2F PE=3 SV=1	P22531	SPRR2E	7.8553	0.584	1.6	0.662777	0.250194	1	0.471	FALSE	FALSE	FALSE	other	0	0	0	0	0	0	0	0	11022000	0	0	0	0	0	0	0	0	1
738	Small proline-rich protein 2G OS=Homo sapiens OX=9606 GN=SPRR2G PE=3 SV=1	Q9BYE4	SPRR2G	8.1576	0.72	2.24	0.602206	0.129093	1	0.392	FALSE	FALSE	FALSE	other	0	0	0	0	0	0	0	0	18431000	0	0	0	0	0	0	0	0	2
739	Small proline-rich protein 4 OS=Homo sapiens OX=9606 GN=SPRR4 PE=2 SV=1	Q96PI1	SPRR4	8.7931	0.368	1.31	0.720026	0.223255	1	0.459	FALSE	FALSE	FALSE	other	0	0	0	0	0	0	0	0	4889100	0	0	0	0	0	0	0	0	1
740	Serine palmitoyltransferase 1 OS=Homo sapiens OX=9606 GN=SPTLC1 PE=1 SV=1	O15269	SPTLC1	52.743	-1.2	-1.17	0.176922	0.187349	1	0.44	FALSE	FALSE	FALSE	other	0	2601700	4847900	0	0	0	0	1274900	0	0	1	2	0	0	0	0	1	0
741	Sequestosome-1 OS=Homo sapiens OX=9606 GN=SQSTM1 PE=1 SV=1	Q13501	SQSTM1	47.687	-1.32	-1.31	0.0768551	0.0787176	1	0.315	FALSE	FALSE	FALSE	cyto	2831900	3801700	0	200150	0	0	379400	0	0	2	2	0	1	0	0	1	0	0
742	Signal recognition particle 9 kDa protein OS=Homo sapiens OX=9606 GN=SRP9 PE=1 SV=1;Signal recognition particle 9 kDa protein OS=Homo sapiens OX=9606 GN=SRP9 PE=1 SV=2	E9PE20	SRP9	7.6677	0.448	0.893	0.621354	0.335812	1	0.498	FALSE	FALSE	FALSE	other	450310	666400	0	0	0	0	672720	4794400	1184800	1	1	0	0	0	0	1	2	1
743	Signal recognition particle receptor subunit alpha OS=Homo sapiens OX=9606 GN=SRPRA PE=1 SV=2	P08240	SRPR	69.81	-0.0506	-0.364	0.934385	0.558039	1	0.582	FALSE	FALSE	FALSE	other	0	1336400	0	0	0	0	0	0	0	0	1	0	1	0	0	0	0	0
744	Signal recognition particle receptor subunit beta (Fragment) OS=Homo sapiens OX=9606 GN=SRPRB PE=1 SV=1;Signal recognition particle receptor subunit beta OS=Homo sapiens OX=9606 GN=SRPRB PE=1 SV=3	H7C4H2	SRPRB	17.502	0.288	0.688	0.723493	0.406323	1	0.522	FALSE	FALSE	FALSE	other	3825300	2955100	4867700	0	2553200	3455000	3250200	2179700	0	1	1	1	0	1	1	1	1	0
745	Serine/arginine repetitive matrix protein 1 (Fragment) OS=Homo sapiens OX=9606 GN=SRRM1 PE=1 SV=1;Serine/arginine repetitive matrix protein 1 OS=Homo sapiens OX=9606 GN=SRRM1 PE=1 SV=3;Serine/arginine repetitive matrix protein 1 OS=Homo sapiens OX=9606 GN=	M0R088	SRRM1	78.139	0.726	0.517	0.362095	0.510644	1	0.564	FALSE	FALSE	FALSE	nuc	0	0	0	908910	0	0	0	0	0	0	0	0	1	0	0	0	0	0
746	Serine/arginine repetitive matrix protein 2 OS=Homo sapiens OX=9606 GN=SRRM2 PE=1 SV=2	Q9UQ35	SRRM2	299.61	-1.17	-0.0973	0.45622	0.949569	1	0.684	FALSE	FALSE	FALSE	nuc	0	7635900	0	0	3294400	0	632980	17917000	0	0	4	0	0	4	0	1	6	1
70	Serrate RNA effector molecule homolog OS=Homo sapiens OX=9606 GN=SRRT PE=1 SV=1;Serrate RNA effector molecule homolog (Fragment) OS=Homo sapiens OX=9606 GN=SRRT PE=1 SV=1	Q9BXP5	SRRT	100.67	0.243	6.04	0.734983	1.89282e-05	1	2.8e-11	FALSE	TRUE	TRUE	nuc	0	0	2064300	0	0	0	24591000	30841000	39769000	0	0	1	0	0	0	8	9	8
747	Serine/arginine-rich-splicing factor 1 OS=Homo sapiens OX=9606 GN=SRSF1 PE=1 SV=1;Serine/arginine-rich splicing factor 1 OS=Homo sapiens OX=9606 GN=SRSF1 PE=1 SV=2;Serine/arginine-rich-splicing factor 1 (Fragment) OS=Homo sapiens OX=9606 GN=SRSF1 PE=1 SV=1	J3KTL2	SRSF1	28.329	0.483	3.32	0.742479	0.0470034	1	0.227	FALSE	FALSE	FALSE	nuc	0	0	0	0	0	0	2014200	25404000	10269000	0	0	0	0	1	0	1	3	2
748	Serine/arginine-rich-splicing factor 11 (Fragment) OS=Homo sapiens OX=9606 GN=SRSF11 PE=1 SV=1;Serine/arginine-rich-splicing factor 11 OS=Homo sapiens OX=9606 GN=SRSF11 PE=1 SV=1;Serine/arginine-rich splicing factor 11 OS=Homo sapiens OX=9606 GN=SRSF11 PE=	Q5T760	SRSF11	42.316	0.235	0.389	0.811048	0.692761	1	0.625	FALSE	FALSE	FALSE	nuc	0	0	0	0	0	0	1688200	0	0	0	0	0	1	0	0	1	0	0
749	Serine/arginine-rich-splicing factor 2 (Fragment) OS=Homo sapiens OX=9606 GN=SRSF2 PE=1 SV=1;Serine/arginine-rich-splicing factor 2 (Fragment) OS=Homo sapiens OX=9606 GN=SRSF2 PE=1 SV=8;Serine/arginine-rich splicing factor 2 OS=Homo sapiens OX=9606 GN=SRSF	J3QL05	SRSF2	15.156	0.698	2.14	0.493601	0.0579544	1	0.263	FALSE	FALSE	FALSE	nuc	0	0	0	0	0	0	0	5422500	5390300	0	0	0	0	0	0	0	1	2
750	Serine/arginine-rich-splicing factor 3 OS=Homo sapiens OX=9606 GN=SRSF3 PE=1 SV=1;Serine/arginine-rich splicing factor 3 OS=Homo sapiens OX=9606 GN=SRSF3 PE=1 SV=1	A0A087X2D0	SRSF3	10.32	0.319	1.14	0.759004	0.289407	1	0.484	FALSE	FALSE	FALSE	nuc	0	0	0	0	0	0	0	7683300	3063900	0	1	0	0	0	0	0	2	1
751	Serine/arginine-rich-splicing factor 4 (Fragment) OS=Homo sapiens OX=9606 GN=SRSF4 PE=1 SV=1;Serine/arginine-rich splicing factor 6 OS=Homo sapiens OX=9606 GN=SRSF6 PE=1 SV=2;Serine/arginine-rich splicing factor 4 OS=Homo sapiens OX=9606 GN=SRSF4 PE=1 SV=2	A0A0D9SEM4	SRSF4	43.647	0.298	1.13	0.789396	0.324781	1	0.495	FALSE	FALSE	FALSE	nuc	0	0	0	0	0	0	946550	8190400	2526900	0	0	0	0	0	0	1	2	1
752	Serine/arginine-rich-splicing factor 7 OS=Homo sapiens OX=9606 GN=SRSF7 PE=1 SV=1;Serine/arginine-rich-splicing factor 7 OS=Homo sapiens OX=9606 GN=SRSF7 PE=1 SV=1;Serine/arginine-rich splicing factor 7 OS=Homo sapiens OX=9606 GN=SRSF7 PE=1 SV=1	A0A0B4J1Z1	SRSF7	15.763	0.955	1.84	0.454765	0.167216	1	0.426	FALSE	FALSE	FALSE	nuc	0	0	0	0	0	0	0	7514100	9619000	0	0	0	0	0	0	0	3	1
753	Translocon-associated protein subunit delta OS=Homo sapiens OX=9606 GN=SSR4 PE=1 SV=1;Translocon-associated protein subunit delta OS=Homo sapiens OX=9606 GN=SSR4 PE=1 SV=1	P51571	SSR4	18.998	-1.37	-0.537	0.146997	0.547904	1	0.578	FALSE	FALSE	FALSE	other	14924000	13032000	12111000	3751600	6297700	11016000	6163100	8055800	5910600	3	2	3	1	2	3	2	3	2
754	Signal transducer and activator of transcription 3 OS=Homo sapiens OX=9606 GN=STAT3 PE=1 SV=2;Signal transducer and activator of transcription OS=Homo sapiens OX=9606 GN=STAT3 PE=1 SV=1	P40763	STAT3	88.067	-0.6	-0.952	0.55111	0.352227	1	0.503	FALSE	FALSE	FALSE	other	3548400	6726300	3672700	0	0	0	4623700	0	4573400	1	2	1	0	0	0	1	0	1
755	Syntaxin-binding protein 4 OS=Homo sapiens OX=9606 GN=STXBP4 PE=1 SV=2	Q6ZWJ1	STXBP4	61.661	2.15	0.504	0.0661399	0.632473	1	0.607	FALSE	FALSE	FALSE	other	9139400	15910000	11168000	0	4942000	8372800	0	0	0	1	1	1	0	1	1	0	0	0
756	Activated RNA polymerase II transcriptional coactivator p15 OS=Homo sapiens OX=9606 GN=SUB1 PE=1 SV=3	P53999	SUB1	14.395	1.98	2.59	0.245957	0.140272	1	0.403	FALSE	FALSE	FALSE	nuc	0	0	0	10409000	0	0	6286600	10931000	8451800	0	0	0	3	0	0	3	2	3
757	SURP and G-patch domain-containing protein 2 OS=Homo sapiens OX=9606 GN=SUGP2 PE=1 SV=1;SURP and G-patch domain-containing protein 2 OS=Homo sapiens OX=9606 GN=SUGP2 PE=1 SV=1;SURP and G-patch domain-containing protein 2 OS=Homo sapiens OX=9606 GN=SUGP2 PE	M0R3F6	SUGP2	93.859	0.844	0.731	0.226937	0.290166	1	0.485	FALSE	FALSE	FALSE	nuc	0	0	723980	0	0	0	854420	589130	706540	0	0	1	1	0	0	1	1	1
758	Protein SGT1 homolog OS=Homo sapiens OX=9606 GN=SUGT1 PE=1 SV=3	Q9Y2Z0	SUGT1	41.024	-0.968	-1.23	0.379649	0.272461	1	0.479	FALSE	FALSE	FALSE	other	0	8517200	0	0	0	0	0	0	0	0	1	1	0	1	0	1	0	0
71	Transcription elongation factor SPT5 OS=Homo sapiens OX=9606 GN=SUPT5H PE=1 SV=1	O00267	SUPT5H	121	0.606	4.79	0.496466	0.000439232	1	4.58e-05	FALSE	TRUE	TRUE	nuc	0	0	0	0	0	0	16073000	18390000	9144300	0	0	0	0	0	0	6	6	5
759	Transcription elongation factor SPT6 OS=Homo sapiens OX=9606 GN=SUPT6H PE=1 SV=2	Q7KZ85	SUPT6H	199.07	0.67	0.499	0.366651	0.496577	1	0.558	FALSE	FALSE	FALSE	other	0	0	0	0	0	0	0	1078300	733210	0	0	0	0	0	0	0	1	1
760	Surfeit 4 OS=Homo sapiens OX=9606 GN=SURF4 PE=1 SV=1;Surfeit locus protein 4 OS=Homo sapiens OX=9606 GN=SURF4 PE=1 SV=3	Q5T8U5	SURF4	21.127	0.224	-3.15	0.845027	0.0211347	1	0.107	FALSE	FALSE	FALSE	nuc	19443000	13043000	13452000	7460500	17591000	13065000	4712700	14368000	5955300	2	2	2	1	3	2	1	2	1
761	Heterogeneous nuclear ribonucleoprotein Q OS=Homo sapiens OX=9606 GN=SYNCRIP PE=1 SV=2;Synaptotagmin binding, cytoplasmic RNA interacting protein, isoform CRA_b OS=Homo sapiens OX=9606 GN=SYNCRIP PE=1 SV=1	O60506	SYNCRIP	69.602	-0.363	0.85	0.798135	0.55264	1	0.58	FALSE	FALSE	FALSE	nuc	0	8216700	659780	0	2373300	0	0	17461000	4642600	0	4	1	0	1	1	0	3	0
762	Nesprin-1 OS=Homo sapiens OX=9606 GN=SYNE1 PE=1 SV=2;Nesprin-1 OS=Homo sapiens OX=9606 GN=SYNE1 PE=1 SV=1;Nesprin-1 OS=Homo sapiens OX=9606 GN=SYNE1 PE=1 SV=4;Nesprin-1 OS=Homo sapiens OX=9606 GN=SYNE1 PE=1 SV=1;Nesprin-1 OS=Homo sapiens OX=9606 GN=SYNE1 P	E7ENN3	SYNE1	964.83	0.852	1.71	0.392699	0.106008	1	0.363	FALSE	FALSE	FALSE	nuc	0	0	17954000	0	0	12652000	2894800	0	6150400	0	0	1	0	0	1	1	0	1
763	SYNJ2BP-COX16 readthrough (Fragment) OS=Homo sapiens OX=9606 GN=SYNJ2BP-COX16 PE=4 SV=1;Synaptojanin-2-binding protein OS=Homo sapiens OX=9606 GN=SYNJ2BP PE=1 SV=2;SYNJ2BP-COX16 readthrough OS=Homo sapiens OX=9606 GN=SYNJ2BP-COX16 PE=4 SV=1;SYNJ2BP-COX16 r	A0A087WUM0	SYNJ2BP-COX16	20.774	-0.336	-0.676	0.773419	0.565161	1	0.585	FALSE	FALSE	FALSE	mito	6444200	0	0	0	0	0	0	0	0	2	0	1	0	0	0	0	0	0
764	Transforming acidic coiled-coil-containing protein 1 (Fragment) OS=Homo sapiens OX=9606 GN=TACC1 PE=1 SV=1;Transforming acidic coiled-coil-containing protein 1 OS=Homo sapiens OX=9606 GN=TACC1 PE=1 SV=1;Transforming acidic coiled-coil-containing protein 1	E5RFM9	TACC1	59.262	0.501	0.602	0.334658	0.251936	1	0.471	FALSE	FALSE	FALSE	cyto	192680	0	450180	0	0	0	0	0	0	1	0	1	0	0	0	0	0	0
765	TATA-binding protein-associated factor 2N OS=Homo sapiens OX=9606 GN=TAF15 PE=1 SV=1;TATA-binding protein-associated factor 2N OS=Homo sapiens OX=9606 GN=TAF15 PE=1 SV=1	Q92804	TAF15	61.829	0.942	0.974	0.316279	0.300927	1	0.488	FALSE	FALSE	FALSE	nuc	0	0	0	0	0	0	1576400	2771300	0	0	0	0	0	0	0	1	2	0
766	Transgelin-2 (Fragment) OS=Homo sapiens OX=9606 GN=TAGLN2 PE=1 SV=1;Transgelin-2 OS=Homo sapiens OX=9606 GN=TAGLN2 PE=1 SV=3	X6RJP6	TAGLN2	21.086	-0.427	0.0681	0.379906	0.886002	1	0.671	FALSE	FALSE	FALSE	cyto	30915000	63185000	40038000	11952000	36855000	19011000	19043000	62981000	35354000	5	6	5	4	6	4	5	5	5
767	TRAF family member-associated NF-kappa-B activator (Fragment) OS=Homo sapiens OX=9606 GN=TANK PE=1 SV=1;TRAF family member-associated NF-kappa-B activator OS=Homo sapiens OX=9606 GN=TANK PE=1 SV=1;TRAF family member-associated NF-kappa-B activator OS=Homo	E7ENY2	TANK	21.915	0.4	2.67	0.832317	0.181253	1	0.436	FALSE	FALSE	FALSE	cyto	0	0	0	0	0	0	0	136990000	0	0	0	0	0	0	0	0	1	0
72	TAR DNA-binding protein 43 OS=Homo sapiens OX=9606 GN=TARDBP PE=1 SV=1;TAR DNA-binding protein 43 (Fragment) OS=Homo sapiens OX=9606 GN=TARDBP PE=1 SV=1;TAR DNA-binding protein 43 OS=Homo sapiens OX=9606 GN=TARDBP PE=1 SV=1;TAR DNA binding protein, isoform	Q13148	TARDBP	44.739	0.515	5.46	0.554482	0.000156438	1	1.35e-06	FALSE	TRUE	TRUE	nuc	0	0	0	0	0	0	24821000	31385000	14174000	1	1	1	1	1	0	7	7	3
768	Threonine--tRNA ligase, cytoplasmic OS=Homo sapiens OX=9606 GN=TARS PE=1 SV=3	P26639	TARS	83.434	-0.00641	-0.414	0.995509	0.717116	1	0.632	FALSE	FALSE	FALSE	other	0	1925700	5102600	0	3182600	1209800	0	0	0	0	1	2	0	2	1	0	0	0
769	TBC1 domain family member 10B OS=Homo sapiens OX=9606 GN=TBC1D10B PE=1 SV=3	Q4KMP7	TBC1D10B	87.198	0.178	-0.116	0.828662	0.887686	1	0.672	FALSE	FALSE	FALSE	other	1398900	787140	1357000	945290	0	961050	842690	0	0	1	1	1	1	0	1	1	0	0
770	TBC1 domain family member 15 (Fragment) OS=Homo sapiens OX=9606 GN=TBC1D15 PE=1 SV=1;TBC1 domain family member 15 OS=Homo sapiens OX=9606 GN=TBC1D15 PE=1 SV=2	C9JA93	TBC1D15	32.136	1.55	0.491	0.0410254	0.465741	1	0.545	FALSE	FALSE	FALSE	other	3694200	3288000	3216500	0	0	1880800	0	0	0	1	1	1	0	0	1	0	0	0
771	Tubulin-folding cofactor B OS=Homo sapiens OX=9606 GN=TBCB PE=1 SV=2;Tubulin-folding cofactor B (Fragment) OS=Homo sapiens OX=9606 GN=TBCB PE=1 SV=8;Tubulin-folding cofactor B OS=Homo sapiens OX=9606 GN=TBCB PE=1 SV=1	Q99426	TBCB	27.325	0.531	1.84	0.657858	0.149188	1	0.411	FALSE	FALSE	FALSE	cyto	0	1321900	0	0	0	0	0	19142000	1136600	0	1	1	0	1	0	0	2	1
73	Transducin beta-like protein 2 OS=Homo sapiens OX=9606 GN=TBL2 PE=1 SV=1;Transducin beta-like protein 2 OS=Homo sapiens OX=9606 GN=TBL2 PE=1 SV=1;TBL2 protein OS=Homo sapiens OX=9606 GN=TBL2 PE=1 SV=1	E9PF19	TBL2	45.935	-2.01	-3.13	0.0274408	0.00290373	1	0.00508	FALSE	TRUE	TRUE	cyto	3322600	4249300	7834500	0	463540	3384300	1950000	0	0	2	2	3	0	1	2	1	0	0
772	cDNA FLJ51251, moderately similar to Transcription elongation factor A protein 1 OS=Homo sapiens OX=9606 GN=TCEA1 PE=1 SV=1;Transcription elongation factor A protein 2 (Fragment) OS=Homo sapiens OX=9606 GN=TCEA2 PE=1 SV=1;Transcription elongation factor A	B7Z4S1	TCEA1	13.445	0.627	0.649	0.429342	0.413855	1	0.525	FALSE	FALSE	FALSE	nuc	0	0	0	0	0	0	833550	0	0	0	0	0	0	0	0	2	0	0
773	Elongin-C OS=Homo sapiens OX=9606 GN=ELOC PE=1 SV=1;Elongin-C (Fragment) OS=Homo sapiens OX=9606 GN=ELOC PE=1 SV=1;Elongin-C OS=Homo sapiens OX=9606 GN=ELOC PE=1 SV=1	R4GMY8	TCEB1	6.968	1.44	0.581	0.1095	0.490407	1	0.556	FALSE	FALSE	FALSE	other	0	0	0	0	0	0	0	1366100	0	0	0	0	0	0	0	0	1	0
774	Elongin-B OS=Homo sapiens OX=9606 GN=ELOB PE=1 SV=1;Elongin-B (Fragment) OS=Homo sapiens OX=9606 GN=ELOB PE=1 SV=1;Elongin-B OS=Homo sapiens OX=9606 GN=ELOB PE=1 SV=1	B8ZZU8	TCEB2	12.527	1.02	0.0933	0.201366	0.901902	1	0.675	FALSE	FALSE	FALSE	other	0	0	0	0	0	0	0	1934400	0	0	0	0	0	0	0	0	1	0
775	Treacle protein (Fragment) OS=Homo sapiens OX=9606 GN=TCOF1 PE=1 SV=1;Treacle protein (Fragment) OS=Homo sapiens OX=9606 GN=TCOF1 PE=1 SV=1;Treacle protein OS=Homo sapiens OX=9606 GN=TCOF1 PE=1 SV=1;Treacle protein OS=Homo sapiens OX=9606 GN=TCOF1 PE=1 SV=	A0A3B3IS06	TCOF1	138.69	0.436	0.14	0.48315	0.819633	1	0.657	FALSE	FALSE	FALSE	nuc	0	0	553650	0	0	0	2618100	0	2794600	0	0	1	1	0	0	3	1	2
776	T-complex protein 1 subunit alpha OS=Homo sapiens OX=9606 GN=TCP1 PE=1 SV=1;T-complex protein 1 subunit alpha OS=Homo sapiens OX=9606 GN=TCP1 PE=1 SV=1;T-complex protein 1 subunit alpha OS=Homo sapiens OX=9606 GN=TCP1 PE=1 SV=1	P17987	TCP1	60.343	0.212	-0.171	0.689368	0.74688	1	0.639	FALSE	FALSE	FALSE	other	27362000	14597000	20728000	10330000	9169000	24253000	21203000	13337000	4018800	7	5	7	6	5	7	9	4	2
777	Very-long-chain enoyl-CoA reductase OS=Homo sapiens OX=9606 GN=TECR PE=1 SV=1;Very-long-chain enoyl-CoA reductase OS=Homo sapiens OX=9606 GN=TECR PE=1 SV=1	M0R2N5	TECR	39.967	-0.103	-1.73	0.931804	0.176891	1	0.433	FALSE	FALSE	FALSE	other	10108000	15330000	16281000	10711000	8280500	12246000	5216800	4453300	6690100	3	4	4	3	3	3	2	3	2
778	Testin (Fragment) OS=Homo sapiens OX=9606 GN=TES PE=1 SV=1;Testin OS=Homo sapiens OX=9606 GN=TES PE=1 SV=1	F8W7T0	TES	8.9703	1.01	0.595	0.2393	0.474238	1	0.549	FALSE	FALSE	FALSE	cyto	0	339400	0	0	0	0	0	0	0	0	1	0	0	0	0	0	0	0
779	Transcription factor Dp-2 (Fragment) OS=Homo sapiens OX=9606 GN=TFDP2 PE=1 SV=1;Transcription factor Dp-2 OS=Homo sapiens OX=9606 GN=TFDP2 PE=1 SV=2	H7C5C2	TFDP2	12.56	0.275	3.13	0.892785	0.151933	1	0.414	FALSE	FALSE	FALSE	nuc	371850000	468050000	0	0	0	331050000	355200000	426940000	202770000	1	1	0	0	0	1	1	1	1
74	Transferrin receptor protein 1 OS=Homo sapiens OX=9606 GN=TFRC PE=1 SV=2;Transferrin receptor (P90, CD71), isoform CRA_c OS=Homo sapiens OX=9606 GN=TFRC PE=1 SV=1	P02786	TFRC	84.87	-0.0186	-3.19	0.983924	0.00691709	1	0.0249	FALSE	TRUE	TRUE	other	8326700	8393800	36809000	5496600	11144000	20333000	2872500	0	0	4	3	10	5	6	7	1	2	1
780	Thimet oligopeptidase OS=Homo sapiens OX=9606 GN=THOP1 PE=1 SV=2;Thimet oligopeptidase (Fragment) OS=Homo sapiens OX=9606 GN=THOP1 PE=1 SV=8	P52888	THOP1	78.839	0.608	2.1	0.521559	0.0481936	1	0.232	FALSE	FALSE	FALSE	cyto	0	0	0	0	0	0	1992500	2364000	5796400	0	0	0	0	0	0	2	2	3
75	Thyroid hormone receptor-associated protein 3 OS=Homo sapiens OX=9606 GN=THRAP3 PE=1 SV=1;Thyroid hormone receptor-associated protein 3 OS=Homo sapiens OX=9606 GN=THRAP3 PE=1 SV=2	A0A3B3ITZ9	THRAP3	103.52	0.56	4.96	0.516357	0.000278154	1	1.09e-05	FALSE	TRUE	TRUE	nuc	0	0	0	0	0	0	22992000	10612000	13799000	0	0	0	0	0	0	11	4	6
781	Nucleolysin TIAR OS=Homo sapiens OX=9606 GN=TIAL1 PE=1 SV=1;Nucleolysin TIAR (Fragment) OS=Homo sapiens OX=9606 GN=TIAL1 PE=1 SV=1;Nucleolysin TIAR OS=Homo sapiens OX=9606 GN=TIAL1 PE=1 SV=1;Nucleolysin TIA-1 isoform p40 OS=Homo sapiens OX=9606 GN=TIA1 PE=	A6NKZ9	TIAL1	9.4465	0.479	1.05	0.5151	0.173288	1	0.43	FALSE	FALSE	FALSE	nuc	0	0	0	0	0	0	0	0	2107400	0	0	0	0	0	0	0	0	1
782	Mitochondrial import inner membrane translocase subunit TIM50 (Fragment) OS=Homo sapiens OX=9606 GN=TIMM50 PE=1 SV=1;Mitochondrial import inner membrane translocase subunit TIM50 (Fragment) OS=Homo sapiens OX=9606 GN=TIMM50 PE=1 SV=1;Mitochondrial import i	M0QXC3	TIMM50	11.529	1.12	1.5	0.148031	0.0649473	1	0.283	FALSE	FALSE	FALSE	other	3653200	4209000	6231500	2119000	2473000	3485000	3117800	2764600	0	1	1	1	1	1	1	1	1	1
783	Tight junction protein ZO-1 OS=Homo sapiens OX=9606 GN=TJP1 PE=1 SV=1;Tight junction protein 1 (Zona occludens 1), isoform CRA_e OS=Homo sapiens OX=9606 GN=TJP1 PE=1 SV=1;Tight junction protein 1 (Zona occludens 1), isoform CRA_a OS=Homo sapiens OX=9606 GN	A0A087X0K9	TJP1	187.85	0.395	0.24	0.561934	0.722963	1	0.633	FALSE	FALSE	FALSE	other	0	333560	0	0	0	0	0	0	0	0	1	0	0	0	0	0	0	0
784	Thymidine kinase OS=Homo sapiens OX=9606 GN=TK1 PE=1 SV=1;Thymidine kinase, cytosolic OS=Homo sapiens OX=9606 GN=TK1 PE=1 SV=2;Thymidine kinase OS=Homo sapiens OX=9606 GN=TK1 PE=1 SV=1;Thymidine kinase (Fragment) OS=Homo sapiens OX=9606 GN=TK1 PE=1 SV=1	K7ERV3	TK1	28.594	-3.96	-0.185	3.37245e-05	0.716488	1	0.631	FALSE	FALSE	FALSE	other	4107400	17431000	10187000	438640	947040	0	5043800	8475300	13907000	2	2	2	1	1	0	1	2	3
76	Transketolase OS=Homo sapiens OX=9606 GN=TKT PE=1 SV=3;Transketolase OS=Homo sapiens OX=9606 GN=TKT PE=1 SV=1	P29401	TKT	67.877	0.363	5.9	0.753858	0.000671279	1	0.000156	FALSE	TRUE	TRUE	nuc	1833500	5974200	2797500	1472400	3801300	3992500	43233000	106700000	75000000	1	2	1	1	1	2	8	11	9
785	Transmembrane emp24 domain-containing protein 10 OS=Homo sapiens OX=9606 GN=TMED10 PE=1 SV=1;Transmembrane emp24 domain-containing protein 10 OS=Homo sapiens OX=9606 GN=TMED10 PE=1 SV=2	G3V2K7	TMED10	16.904	0.155	-0.473	0.861275	0.596453	1	0.595	FALSE	FALSE	FALSE	other	0	2512800	0	0	0	0	0	0	0	0	1	0	1	0	0	0	0	0
786	Transmembrane emp24 domain-containing protein 2 OS=Homo sapiens OX=9606 GN=TMED2 PE=1 SV=1;Transmembrane emp24 domain-containing protein 2 OS=Homo sapiens OX=9606 GN=TMED2 PE=1 SV=1;Transmembrane emp24 domain-containing protein 2 (Fragment) OS=Homo sapiens	F5GX39	TMED2	13.631	0.319	0.657	0.732803	0.486921	1	0.554	FALSE	FALSE	FALSE	other	2310700	0	3508200	1834100	0	2495800	2151200	1770400	1568900	1	0	1	1	0	1	2	1	1
787	Protein TMED7-TICAM2 OS=Homo sapiens OX=9606 GN=TMED7-TICAM2 PE=3 SV=1;Transmembrane emp24 domain-containing protein 7 OS=Homo sapiens OX=9606 GN=TMED7 PE=1 SV=2;Transmembrane emp24 domain-containing protein 7 (Fragment) OS=Homo sapiens OX=9606 GN=TMED7 PE	A0A0A6YYA0	TMED7-TICAM2	21.233	-0.493	-1.37	0.607666	0.174533	1	0.431	FALSE	FALSE	FALSE	other	2798300	0	6020900	0	0	0	0	0	0	1	0	2	0	0	0	0	0	0
788	Transmembrane protein 165 OS=Homo sapiens OX=9606 GN=TMEM165 PE=1 SV=1;GDT1 family protein OS=Homo sapiens OX=9606 GN=TMEM165 PE=1 SV=1;Transmembrane protein 165 OS=Homo sapiens OX=9606 GN=TMEM165 PE=1 SV=1	D6RBL0	TMEM165	8.1112	0.938	1.21	0.347418	0.232379	1	0.463	FALSE	FALSE	FALSE	other	0	0	0	0	2492500	0	3393100	4604200	3740100	0	0	0	0	1	0	1	1	1
789	Transmembrane protein 201 (Fragment) OS=Homo sapiens OX=9606 GN=TMEM201 PE=1 SV=1;Transmembrane protein 201 OS=Homo sapiens OX=9606 GN=TMEM201 PE=1 SV=1	H0Y4R5	TMEM201	59.729	0.354	0.632	0.71195	0.513426	1	0.565	FALSE	FALSE	FALSE	nuc	0	0	0	0	0	0	0	4723700	0	0	0	0	0	1	0	0	1	0
790	Insulin-like growth factor-binding protein 3 receptor (Fragment) OS=Homo sapiens OX=9606 GN=TMEM219 PE=1 SV=1;Insulin-like growth factor-binding protein 3 receptor OS=Homo sapiens OX=9606 GN=TMEM219 PE=1 SV=1	I3L2P0	TMEM219	24.698	0.658	0.793	0.60329	0.532743	1	0.573	FALSE	FALSE	FALSE	other	0	0	0	0	0	0	0	8870600	0	0	0	0	0	0	0	0	1	0
791	Transmembrane protein 263 OS=Homo sapiens OX=9606 GN=TMEM263 PE=1 SV=1	Q8WUH6	TMEM263	11.748	0.722	0.802	0.295315	0.248434	1	0.47	FALSE	FALSE	FALSE	other	69369000	138990000	216770000	56868000	269710000	261550000	67568000	380470000	273370000	3	4	5	3	5	6	3	5	5
792	Transmembrane protein 33 (Fragment) OS=Homo sapiens OX=9606 GN=TMEM33 PE=1 SV=1;Transmembrane protein 33 OS=Homo sapiens OX=9606 GN=TMEM33 PE=1 SV=2;Transmembrane protein 33 (Fragment) OS=Homo sapiens OX=9606 GN=TMEM33 PE=1 SV=1	D6RAA6	TMEM33	25.223	-1.06	-1.23	0.432727	0.364341	1	0.507	FALSE	FALSE	FALSE	other	0	5376900	18927000	0	0	7061400	0	3595500	0	0	2	2	1	0	2	0	1	0
793	Tropomodulin-3 (Fragment) OS=Homo sapiens OX=9606 GN=TMOD3 PE=1 SV=1;Tropomodulin-3 OS=Homo sapiens OX=9606 GN=TMOD3 PE=1 SV=1;Tropomodulin 2 (Neuronal), isoform CRA_a OS=Homo sapiens OX=9606 GN=TMOD2 PE=1 SV=1;Tropomodulin-2 OS=Homo sapiens OX=9606 GN=TMO	H0YKU1	TMOD3	20.79	0.547	0.182	0.458712	0.802793	1	0.653	FALSE	FALSE	FALSE	cyto	0	502100	0	0	656360	0	0	946000	303240	0	1	0	0	1	0	0	1	1
77	Lamina-associated polypeptide 2, isoform alpha OS=Homo sapiens OX=9606 GN=TMPO PE=1 SV=2	P42166	TMPO	75.491	-1.17	2.36	0.0348085	0.000833066	1	0.000275	FALSE	TRUE	TRUE	nuc	16579000	37163000	12220000	3336000	7996600	5137100	135540000	134030000	121280000	5	7	4	3	3	2	12	12	11
794	Thymosin beta-10 OS=Homo sapiens OX=9606 GN=TMSB10 PE=1 SV=2	P63313	TMSB10	5.0256	0.719	0.711	0.348525	0.353913	1	0.503	FALSE	FALSE	FALSE	other	766400	0	0	0	0	0	1152800	0	0	1	0	0	0	0	0	1	0	0
795	Transportin-1 OS=Homo sapiens OX=9606 GN=TNPO1 PE=1 SV=1;Transportin-1 OS=Homo sapiens OX=9606 GN=TNPO1 PE=1 SV=2	E7EW37	TNPO1	15.549	0.708	0.992	0.32653	0.181104	1	0.436	FALSE	FALSE	FALSE	nuc	1818300	2421200	2836400	653030	1136700	1352600	1010200	0	1500200	1	1	1	1	1	1	1	0	1
796	Mitochondrial import receptor subunit TOM22 homolog OS=Homo sapiens OX=9606 GN=TOMM22 PE=1 SV=3	Q9NS69	TOMM22	15.521	0.35	-0.285	0.726342	0.775454	1	0.646	FALSE	FALSE	FALSE	mito	3767200	2738800	0	2333100	1594400	0	1887300	3972100	0	2	1	0	1	1	0	1	1	0
797	Mitochondrial import receptor subunit TOM40 homolog (Fragment) OS=Homo sapiens OX=9606 GN=TOMM40 PE=1 SV=8;Mitochondrial import receptor subunit TOM40 homolog OS=Homo sapiens OX=9606 GN=TOMM40 PE=1 SV=1	K7EJ57	TOMM40	21.914	-1.29	0.0593	0.483633	0.973868	1	0.689	FALSE	FALSE	FALSE	mito	21265000	14354000	6035000	3959600	4573200	7299400	0	16270000	0	3	2	1	1	1	1	0	3	0
78	Mitochondrial import receptor subunit TOM70 OS=Homo sapiens OX=9606 GN=TOMM70 PE=1 SV=1	O94826	TOMM70A	67.454	-2.35	-5.11	0.0238367	0.000276783	1	1.07e-05	FALSE	TRUE	TRUE	other	35121000	27049000	27256000	2959400	1118000	4633500	0	0	0	8	5	5	2	1	2	0	0	0
798	DNA topoisomerase 2-alpha OS=Homo sapiens OX=9606 GN=TOP2A PE=1 SV=3	P11388	TOP2A	174.38	-0.0921	1.22	0.946536	0.385878	1	0.515	FALSE	FALSE	FALSE	nuc	0	1594800	0	0	4902600	261310	0	20823000	825210	0	2	0	0	2	1	0	8	1
799	Torsin-1A-interacting protein 2 OS=Homo sapiens OX=9606 GN=TOR1AIP2 PE=1 SV=1;Torsin-1A-interacting protein 1 (Fragment) OS=Homo sapiens OX=9606 GN=TOR1AIP1 PE=1 SV=1;Torsin-1A-interacting protein 1 OS=Homo sapiens OX=9606 GN=TOR1AIP1 PE=1 SV=1;Torsin-1A-i	Q8NFQ8	TOR1AIP2	51.263	0.0549	-0.518	0.954199	0.59141	1	0.594	FALSE	FALSE	FALSE	other	0	0	2767100	450300	0	0	0	0	1215100	0	0	2	1	0	0	0	0	1
800	Triosephosphate isomerase OS=Homo sapiens OX=9606 GN=TPI1 PE=1 SV=3;Triosephosphate isomerase (Fragment) OS=Homo sapiens OX=9606 GN=TPI1 PE=1 SV=1	P60174	TPI1	30.791	-0.288	0.639	0.801816	0.579958	1	0.59	FALSE	FALSE	FALSE	nuc	0	0	0	248280	0	0	243210	9495000	0	0	0	0	1	0	0	1	3	0
801	Tropomyosin 1 (Alpha), isoform CRA_m OS=Homo sapiens OX=9606 GN=TPM1 PE=1 SV=1;Tropomyosin alpha-1 chain OS=Homo sapiens OX=9606 GN=TPM1 PE=1 SV=2;Tropomyosin alpha-1 chain OS=Homo sapiens OX=9606 GN=TPM1 PE=1 SV=1;Tropomyosin alpha-1 chain (Fragment) OS=H	H7BYY1	TPM1	28.747	1.84	0.11	0.12723	0.921691	1	0.679	FALSE	FALSE	FALSE	other	0	0	0	0	6957900	0	0	5709100	0	0	0	0	0	2	0	0	1	0
802	Tropomyosin 1 (Alpha), isoform CRA_f OS=Homo sapiens OX=9606 GN=TPM1 PE=1 SV=1	Q6ZN40	TPM1.1	37.452	0.821	-0.0243	0.37202	0.978394	1	0.69	FALSE	FALSE	FALSE	other	0	0	0	0	2684900	0	0	0	0	0	0	0	0	0	0	0	0	0
803	Tropomyosin alpha-3 chain OS=Homo sapiens OX=9606 GN=TPM3 PE=1 SV=1;Tropomyosin alpha-3 chain OS=Homo sapiens OX=9606 GN=TPM3 PE=1 SV=2	J3KN67	TPM3	33.222	1.96	1.07	0.173221	0.43817	1	0.532	FALSE	FALSE	FALSE	other	0	0	0	0	12929000	0	0	13766000	0	0	0	0	0	0	0	0	0	0
804	Tropomyosin alpha-4 chain (Fragment) OS=Homo sapiens OX=9606 GN=TPM4 PE=1 SV=1;Tropomyosin alpha-4 chain OS=Homo sapiens OX=9606 GN=TPM4 PE=1 SV=1;Tropomyosin alpha-4 chain OS=Homo sapiens OX=9606 GN=TPM4 PE=1 SV=3;Tropomyosin alpha-4 chain OS=Homo sapiens	A0A2R8YH90	TPM4	25.414	0.4	-0.314	0.750132	0.802831	1	0.653	FALSE	FALSE	FALSE	other	0	2969500	0	0	3247700	0	0	9890500	0	0	1	0	0	1	0	0	2	0
805	Targeting protein for Xklp2 OS=Homo sapiens OX=9606 GN=TPX2 PE=1 SV=2	Q9ULW0	TPX2	85.652	0.251	2.34	0.819003	0.0576193	1	0.262	FALSE	FALSE	FALSE	nuc	0	0	0	0	0	0	1200400	6858800	6735600	0	1	0	0	0	0	3	3	3
806	Heat shock protein 75 kDa, mitochondrial OS=Homo sapiens OX=9606 GN=TRAP1 PE=1 SV=1;Heat shock protein 75 kDa, mitochondrial OS=Homo sapiens OX=9606 GN=TRAP1 PE=1 SV=3	I3L0K7	TRAP1	57.219	-0.666	-0.674	0.443184	0.438393	1	0.532	FALSE	FALSE	FALSE	mito	1250700	0	4253800	0	0	1120700	0	0	0	1	0	2	0	0	1	0	1	0
79	Transcription intermediary factor 1-beta OS=Homo sapiens OX=9606 GN=TRIM28 PE=1 SV=5;Transcription intermediary factor 1-beta (Fragment) OS=Homo sapiens OX=9606 GN=TRIM28 PE=1 SV=1	Q13263	TRIM28	88.549	0.118	6.95	0.865614	5.44475e-06	1	1.11e-14	FALSE	TRUE	TRUE	nuc	0	0	0	0	0	0	86360000	108410000	48351000	0	0	0	0	0	0	14	15	9
80	Pachytene checkpoint protein 2 homolog OS=Homo sapiens OX=9606 GN=TRIP13 PE=1 SV=2	Q15645	TRIP13	48.55	-3.08	-3.91	0.0279352	0.00928194	1	0.0392	FALSE	TRUE	TRUE	nuc	4623600	6836300	31671000	0	0	0	0	6287000	0	1	2	4	0	0	1	0	2	0
807	Thyroid receptor-interacting protein 6 OS=Homo sapiens OX=9606 GN=TRIP6 PE=1 SV=3	Q15654	TRIP6	50.287	-0.66	-0.353	0.146293	0.416219	1	0.525	FALSE	FALSE	FALSE	cyto	22784000	32893000	17374000	4969800	11036000	8426900	11841000	16572000	14106000	3	4	5	2	3	3	3	3	3
808	tRNA (guanine(26)-N(2))-dimethyltransferase (Fragment) OS=Homo sapiens OX=9606 GN=TRMT1 PE=1 SV=1;tRNA (guanine(26)-N(2))-dimethyltransferase OS=Homo sapiens OX=9606 GN=TRMT1 PE=1 SV=1;tRNA (guanine(26)-N(2))-dimethyltransferase OS=Homo sapiens OX=9606 GN=	K7EQQ8	TRMT1	32.795	-0.00167	0.884	0.998316	0.281884	1	0.482	FALSE	FALSE	FALSE	cyto	0	0	0	0	0	0	0	2785200	1992000	0	0	0	0	0	0	0	2	1
809	Testis-specific protein 10-interacting protein OS=Homo sapiens OX=9606 GN=TSGA10IP PE=4 SV=1;Testis-specific protein 10-interacting protein OS=Homo sapiens OX=9606 GN=TSGA10IP PE=1 SV=2	A0A087WZG0	TSGA10IP	11.132	0.415	1.15	0.668045	0.251691	1	0.471	FALSE	FALSE	FALSE	other	0	0	0	0	6311000	0	4932500	0	3549600	0	0	0	0	1	0	1	0	1
810	Translin OS=Homo sapiens OX=9606 GN=TSN PE=1 SV=1;Translin (Fragment) OS=Homo sapiens OX=9606 GN=TSN PE=1 SV=1;Translin OS=Homo sapiens OX=9606 GN=TSN PE=1 SV=1;Translin OS=Homo sapiens OX=9606 GN=TSN PE=1 SV=1	A0A0J9YVW2	TSN	10.691	0.614	0.811	0.483615	0.359723	1	0.506	FALSE	FALSE	FALSE	nuc	1040300	1564500	2267700	0	0	1227100	0	0	1711200	1	1	1	0	0	1	0	1	1
811	Dual specificity protein kinase TTK OS=Homo sapiens OX=9606 GN=TTK PE=1 SV=2	P33981	TTK	97.071	0.0178	-0.717	0.977568	0.27661	1	0.48	FALSE	FALSE	FALSE	other	0	1649400	0	0	0	0	0	0	1469700	0	1	0	0	0	0	0	0	1
812	Tubulin alpha-1B chain OS=Homo sapiens OX=9606 GN=TUBA1B PE=1 SV=1	P68363	TUBA1B	50.151	-0.125	-0.401	0.759994	0.338249	1	0.499	FALSE	FALSE	FALSE	other	522580000	816820000	636540000	223160000	559930000	462910000	219180000	658410000	368680000	0	0	0	0	0	0	0	0	0
813	Tubulin alpha chain OS=Homo sapiens OX=9606 GN=TUBA1C PE=1 SV=1;Tubulin alpha-1C chain OS=Homo sapiens OX=9606 GN=TUBA1C PE=1 SV=1;Tubulin alpha-1C chain OS=Homo sapiens OX=9606 GN=TUBA1C PE=1 SV=1;Tubulin alpha-1B chain (Fragment) OS=Homo sapiens OX=9606	F5H5D3	TUBA1C	57.73	0.79	0.369	0.725556	0.869253	1	0.668	FALSE	FALSE	FALSE	other	19465000	17021000	18944000	7647400	20505000	13137000	9375400	28550000	10227000	2	1	1	1	2	1	1	2	1
814	Tubulin alpha-4A chain OS=Homo sapiens OX=9606 GN=TUBA4A PE=1 SV=1	P68366	TUBA4A	49.924	0.725	0.437	0.6904	0.809808	1	0.655	FALSE	FALSE	FALSE	other	8928200	4696600	0	1894500	8430200	4741600	2450500	12890000	3937900	2	1	0	1	3	1	1	2	1
815	Tubulin beta chain OS=Homo sapiens OX=9606 GN=TUBB PE=1 SV=1;Tubulin beta chain OS=Homo sapiens OX=9606 GN=TUBB PE=1 SV=2;Tubulin beta chain OS=Homo sapiens OX=9606 GN=TUBB PE=1 SV=1	Q5JP53	TUBB	47.766	-0.0502	-0.0786	0.902166	0.847505	1	0.663	FALSE	FALSE	FALSE	other	99053000	193560000	145060000	35216000	102270000	124160000	87487000	137590000	77033000	3	4	3	2	4	3	3	4	3
816	Tubulin beta-4B chain OS=Homo sapiens OX=9606 GN=TUBB4B PE=1 SV=1;Tubulin beta-4A chain OS=Homo sapiens OX=9606 GN=TUBB4A PE=1 SV=2	P68371	TUBB4B	49.83	0.019	-0.176	0.962877	0.667707	1	0.618	FALSE	FALSE	FALSE	other	348730000	408050000	407770000	164360000	374610000	358530000	207280000	423110000	293250000	3	3	3	3	3	3	3	3	3
817	Tubulin beta-8 chain OS=Homo sapiens OX=9606 GN=TUBB8 PE=1 SV=2;Tubulin beta chain OS=Homo sapiens OX=9606 GN=TUBB8 PE=1 SV=1;Tubulin beta chain OS=Homo sapiens OX=9606 GN=TUBB8 PE=1 SV=1	Q3ZCM7	TUBB8	49.775	0.13	1.78	0.926286	0.225556	1	0.46	FALSE	FALSE	FALSE	other	9064500	21761000	12235000	8631500	17895000	13065000	0	30006000	0	1	1	1	1	1	1	0	1	0
818	Elongation factor Tu, mitochondrial OS=Homo sapiens OX=9606 GN=TUFM PE=1 SV=2	P49411	TUFM	49.541	0.0785	-0.186	0.856241	0.668792	1	0.618	FALSE	FALSE	FALSE	mito	78634000	68602000	101510000	64376000	52064000	99456000	57423000	48713000	54577000	16	9	11	14	10	11	11	8	10
819	Thioredoxin OS=Homo sapiens OX=9606 GN=TXN PE=1 SV=3	P10599	TXN	11.737	-1.53	3.01	0.385802	0.107485	1	0.365	FALSE	FALSE	FALSE	other	16098000	23781000	12679000	4390100	12240000	7927900	33122000	63256000	47769000	2	2	1	1	2	1	3	4	2
820	Thioredoxin domain-containing protein 5 OS=Homo sapiens OX=9606 GN=TXNDC5 PE=1 SV=2	Q8NBS9	TXNDC5	47.628	-0.0644	-1.54	0.966041	0.324665	1	0.495	FALSE	FALSE	FALSE	other	3093500	1431700	3828000	7364400	826720	2614000	1177600	1477800	1542900	2	1	2	2	1	1	1	1	1
821	Thioredoxin reductase 1, cytoplasmic OS=Homo sapiens OX=9606 GN=TXNRD1 PE=1 SV=2;Thioredoxin reductase 1, cytoplasmic OS=Homo sapiens OX=9606 GN=TXNRD1 PE=1 SV=1;Thioredoxin reductase 1, cytoplasmic OS=Homo sapiens OX=9606 GN=TXNRD1 PE=1 SV=1;Thioredoxin r	E2QRB9	TXNRD1	50.723	0.689	0.821	0.51297	0.438214	1	0.532	FALSE	FALSE	FALSE	nuc	4181800	4362900	0	0	0	0	2382500	0	0	1	1	0	1	1	0	1	0	0
822	Splicing factor U2AF 35 kDa subunit-like protein OS=Homo sapiens OX=9606 GN=U2AF1L5 PE=1 SV=1;Splicing factor U2AF 35 kDa subunit OS=Homo sapiens OX=9606 GN=U2AF1 PE=1 SV=3	P0DN76	U2AF1	27.872	0.682	0.844	0.435726	0.338926	1	0.499	FALSE	FALSE	FALSE	nuc	0	0	0	1361000	0	0	2246500	2319800	1688100	0	0	0	1	0	0	1	1	1
823	U2 snRNP-associated SURP motif-containing protein OS=Homo sapiens OX=9606 GN=U2SURP PE=1 SV=1;U2 snRNP-associated SURP motif-containing protein OS=Homo sapiens OX=9606 GN=U2SURP PE=1 SV=2;U2 snRNP-associated SURP motif-containing protein (Fragment) OS=Homo	E7ET15	U2SURP	118.25	0.353	1.18	0.783599	0.371266	1	0.51	FALSE	FALSE	FALSE	nuc	0	0	0	0	0	0	9415100	0	7132400	0	0	0	0	0	0	2	0	1
81	Ubiquitin-like modifier-activating enzyme 1 OS=Homo sapiens OX=9606 GN=UBA1 PE=1 SV=3	P22314	UBA1	117.85	0.809	5.04	0.299837	0.000106441	1	3.1e-07	FALSE	TRUE	TRUE	nuc	0	0	1549200	0	0	0	12300000	31267000	9548900	1	0	1	0	0	0	5	8	3
824	Ubiquitin-60S ribosomal protein L40 OS=Homo sapiens OX=9606 GN=UBA52 PE=1 SV=2;Ubiquitin-60S ribosomal protein L40 (Fragment) OS=Homo sapiens OX=9606 GN=UBA52 PE=1 SV=1	P62987	UBA52	14.728	-0.367	-2.15	0.877736	0.379898	1	0.513	FALSE	FALSE	FALSE	cyto	19123000	40433000	42502000	12349000	18699000	39796000	17898000	45703000	62072000	0	1	0	1	0	1	0	0	0
825	Ubiquitin-associated protein 2 OS=Homo sapiens OX=9606 GN=UBAP2 PE=1 SV=1;Ubiquitin-associated protein 2 (Fragment) OS=Homo sapiens OX=9606 GN=UBAP2 PE=1 SV=1	Q5T6F2	UBAP2	117.11	-0.775	-1.15	0.39558	0.217342	1	0.456	FALSE	FALSE	FALSE	cyto	0	4457100	0	0	0	0	0	0	0	0	2	1	0	0	0	0	0	0
826	Ubiquitin-associated protein 2-like (Fragment) OS=Homo sapiens OX=9606 GN=UBAP2L PE=1 SV=1;Ubiquitin-associated protein 2-like (Fragment) OS=Homo sapiens OX=9606 GN=UBAP2L PE=1 SV=1;Ubiquitin-associated protein 2-like (Fragment) OS=Homo sapiens OX=9606 GN=	Q5VU81	UBAP2L	20.233	0.689	0.02	0.349437	0.977682	1	0.689	FALSE	FALSE	FALSE	other	0	2883100	1433600	0	0	0	0	0	0	0	1	1	0	0	0	0	0	0
827	NEDD8-conjugating enzyme Ubc12 (Fragment) OS=Homo sapiens OX=9606 GN=UBE2M PE=1 SV=1;NEDD8-conjugating enzyme Ubc12 OS=Homo sapiens OX=9606 GN=UBE2M PE=1 SV=1	M0QYI6	UBE2M	12.953	0.555	0.837	0.413849	0.229508	1	0.462	FALSE	FALSE	FALSE	nuc	0	0	0	0	0	0	0	0	1519700	0	0	0	0	0	0	0	0	1
82	E3 ubiquitin-protein ligase UHRF1 OS=Homo sapiens OX=9606 GN=UHRF1 PE=1 SV=1;E3 ubiquitin-protein ligase UHRF1 OS=Homo sapiens OX=9606 GN=UHRF1 PE=1 SV=1;E3 ubiquitin-protein ligase UHRF1 OS=Homo sapiens OX=9606 GN=UHRF1 PE=1 SV=1;E3 ubiquitin-protein liga	A0A087WVR3	UHRF1	91.099	1.14	5.23	0.186269	0.000143672	1	9.97e-07	FALSE	TRUE	TRUE	nuc	0	0	0	0	0	0	14943000	10538000	19387000	0	0	0	0	0	0	4	5	5
828	Cytochrome b-c1 complex subunit 2, mitochondrial OS=Homo sapiens OX=9606 GN=UQCRC2 PE=1 SV=1;Cytochrome b-c1 complex subunit 2, mitochondrial OS=Homo sapiens OX=9606 GN=UQCRC2 PE=1 SV=1;Cytochrome b-c1 complex subunit 2, mitochondrial OS=Homo sapiens OX=96	H3BSJ9	UQCRC2	36.389	-0.465	0.359	0.647598	0.723171	1	0.633	FALSE	FALSE	FALSE	mito	3390800	4365300	3267500	901320	3073300	1721800	2889700	5241000	474860	2	2	2	1	3	1	2	2	1
829	Up-regulated during skeletal muscle growth protein 5 OS=Homo sapiens OX=9606 GN=ATP5MD PE=1 SV=1	Q96IX5	USMG5	6.4575	-0.112	-0.287	0.909587	0.771111	1	0.645	FALSE	FALSE	FALSE	other	3505200	0	0	0	0	0	0	0	0	1	0	0	0	0	0	0	0	0
830	Ubiquitin carboxyl-terminal hydrolase 14 OS=Homo sapiens OX=9606 GN=USP14 PE=1 SV=2;Ubiquitin carboxyl-terminal hydrolase 14 OS=Homo sapiens OX=9606 GN=USP14 PE=1 SV=3	A6NJA2	USP14	51.086	0.593	0.571	0.4134	0.430289	1	0.53	FALSE	FALSE	FALSE	cyto	0	1269900	0	0	0	0	0	1588900	0	0	1	0	0	0	0	0	1	0
831	Ubiquitin carboxyl-terminal hydrolase 48 OS=Homo sapiens OX=9606 GN=USP48 PE=1 SV=1;Ubiquitin carboxyl-terminal hydrolase 48 OS=Homo sapiens OX=9606 GN=USP48 PE=1 SV=1	Q86UV5	USP48	119.03	0.718	1.37	0.417716	0.140604	1	0.404	FALSE	FALSE	FALSE	nuc	0	0	0	0	0	0	1621400	0	1943300	0	0	0	0	0	0	2	0	2
832	Vesicle-associated membrane protein-associated protein A OS=Homo sapiens OX=9606 GN=VAPA PE=1 SV=3	Q9P0L0	VAPA	27.893	-0.555	-1.47	0.442025	0.0640773	1	0.281	FALSE	FALSE	FALSE	other	6883200	6161800	11153000	1954400	3014800	3413000	2214300	6751500	1292200	2	1	3	1	1	1	1	2	1
833	Vinculin OS=Homo sapiens OX=9606 GN=VCL PE=1 SV=4	P18206	VCL	123.8	1.18	0.0413	0.0917796	0.948177	1	0.684	FALSE	FALSE	FALSE	other	0	1843500	0	0	2017600	0	0	0	0	0	1	0	0	1	0	0	0	0
834	Transitional endoplasmic reticulum ATPase OS=Homo sapiens OX=9606 GN=VCP PE=1 SV=4	P55072	VCP	89.321	-1.14	-0.94	0.0583003	0.106379	1	0.363	FALSE	FALSE	FALSE	other	89783000	38310000	40845000	12717000	6690600	10287000	16655000	18789000	9837000	14	8	7	5	3	5	8	5	4
835	Voltage-dependent anion-selective channel protein 1 OS=Homo sapiens OX=9606 GN=VDAC1 PE=1 SV=2	P21796	VDAC1	30.772	0.597	0.824	0.508516	0.367707	1	0.509	FALSE	FALSE	FALSE	other	2936200	4248300	1935500	0	2829400	0	0	3777700	0	1	1	1	1	1	1	1	1	0
836	Voltage-dependent anion-selective channel protein 2 (Fragment) OS=Homo sapiens OX=9606 GN=VDAC2 PE=1 SV=1;Voltage-dependent anion-selective channel protein 2 OS=Homo sapiens OX=9606 GN=VDAC2 PE=1 SV=2;Voltage-dependent anion-selective channel protein 2 (Fr	A0A0A0MR02	VDAC2	30.348	-0.427	-1.15	0.441567	0.0599717	1	0.269	FALSE	FALSE	FALSE	mito	52574000	77688000	35345000	17227000	43870000	19993000	20141000	21099000	6193800	6	7	6	5	6	4	4	4	2
837	Voltage-dependent anion-selective channel protein 3 OS=Homo sapiens OX=9606 GN=VDAC3 PE=1 SV=1;Voltage-dependent anion-selective channel protein 3 (Fragment) OS=Homo sapiens OX=9606 GN=VDAC3 PE=1 SV=8;Voltage-dependent anion-selective channel protein 3 (Fr	Q9Y277	VDAC3	30.658	-0.0959	-3.29	0.930448	0.0143719	1	0.0703	FALSE	FALSE	FALSE	mito	18891000	53544000	6901700	7983600	21375000	7204100	0	11032000	0	4	6	2	2	4	2	0	2	0
838	Vimentin OS=Homo sapiens OX=9606 GN=VIM PE=1 SV=4;Vimentin variant 3 OS=Homo sapiens OX=9606 GN=VIM PE=1 SV=1	P08670	VIM	53.651	0.114	-0.119	0.780264	0.771775	1	0.646	FALSE	FALSE	FALSE	other	45400000	79388000	53025000	25920000	57556000	78574000	18602000	62224000	32982000	8	10	6	8	10	10	6	13	10
839	Serine/threonine-protein kinase VRK1 (Fragment) OS=Homo sapiens OX=9606 GN=VRK1 PE=1 SV=1;Serine/threonine-protein kinase VRK1 OS=Homo sapiens OX=9606 GN=VRK1 PE=1 SV=1	H0YJF7	VRK1	7.3568	0.783	0.959	0.444864	0.35403	1	0.503	FALSE	FALSE	FALSE	nuc	0	0	0	0	0	0	0	4854700	0	0	0	0	0	0	0	0	1	0
840	X-ray repair cross-complementing protein 5 OS=Homo sapiens OX=9606 GN=XRCC5 PE=1 SV=3	P13010	XRCC5	82.704	0.37	1.14	0.717119	0.278344	1	0.481	FALSE	FALSE	FALSE	nuc	0	0	3007400	0	0	0	0	2502200	3452300	0	0	1	0	0	0	0	1	1
841	X-ray repair cross-complementing protein 6 OS=Homo sapiens OX=9606 GN=XRCC6 PE=1 SV=1;X-ray repair cross-complementing protein 6 OS=Homo sapiens OX=9606 GN=XRCC6 PE=1 SV=2	B1AHC9	XRCC6	64.283	0.457	2.58	0.688431	0.045852	1	0.223	FALSE	FALSE	FALSE	nuc	0	0	0	0	0	0	0	12535000	4629100	0	0	0	0	0	0	0	3	2
842	5-3 exoribonuclease 2 OS=Homo sapiens OX=9606 GN=XRN2 PE=1 SV=1	Q9H0D6	XRN2	108.58	0.561	0.93	0.481324	0.255309	1	0.473	FALSE	FALSE	FALSE	nuc	0	0	0	0	0	0	1084500	2150900	0	0	0	0	0	0	0	1	1	0
843	Nuclease-sensitive element-binding protein 1 OS=Homo sapiens OX=9606 GN=YBX1 PE=1 SV=3;Nuclease-sensitive element-binding protein 1 (Fragment) OS=Homo sapiens OX=9606 GN=YBX1 PE=1 SV=1;Nuclease-sensitive element-binding protein 1 (Fragment) OS=Homo sapiens	P67809	YBX1	35.924	-1.21	-2.42	0.534963	0.227989	1	0.461	FALSE	FALSE	FALSE	cyto	2920800	43043000	18473000	0	11114000	10643000	0	89010000	0	3	6	4	0	4	4	0	9	0
844	Protein YIPF5 OS=Homo sapiens OX=9606 GN=YIPF5 PE=1 SV=1;Protein YIPF5 (Fragment) OS=Homo sapiens OX=9606 GN=YIPF5 PE=1 SV=1;Protein YIPF (Fragment) OS=Homo sapiens OX=9606 GN=YIPF5 PE=1 SV=1	Q969M3	YIPF5	27.989	-0.39	-0.921	0.727061	0.417891	1	0.526	FALSE	FALSE	FALSE	other	5755700	3042900	2287200	0	0	0	0	0	0	2	1	1	0	0	0	0	0	0
845	YLP motif-containing protein 1 OS=Homo sapiens OX=9606 GN=YLPM1 PE=1 SV=4;YLP motif-containing protein 1 OS=Homo sapiens OX=9606 GN=YLPM1 PE=1 SV=1;YLP motif-containing protein 1 (Fragment) OS=Homo sapiens OX=9606 GN=YLPM1 PE=1 SV=1	P49750	YLPM1	241.64	0.448	2.23	0.681548	0.0659825	1	0.286	FALSE	FALSE	FALSE	nuc	0	0	0	0	0	0	4934100	0	3583600	0	0	0	0	0	0	3	0	2
846	14-3-3 protein beta/alpha OS=Homo sapiens OX=9606 GN=YWHAB PE=1 SV=3	P31946	YWHAB	28.082	0.225	1.08	0.83718	0.334699	1	0.498	FALSE	FALSE	FALSE	cyto	2757200	2321700	2095100	1330700	1364300	1706900	1163500	7107900	0	1	1	1	1	1	1	1	2	1
847	14-3-3 protein epsilon OS=Homo sapiens OX=9606 GN=YWHAE PE=1 SV=1;14-3-3 protein epsilon (Fragment) OS=Homo sapiens OX=9606 GN=YWHAE PE=1 SV=1	P62258	YWHAE	29.174	0.537	1.7	0.657847	0.182957	1	0.437	FALSE	FALSE	FALSE	cyto	3276400	2895500	2662900	0	0	0	1821600	14657000	1799500	1	1	1	0	0	0	1	3	1
848	14-3-3 protein theta OS=Homo sapiens OX=9606 GN=YWHAQ PE=1 SV=1	P27348	YWHAQ	27.764	-3.92	-2.95	0.0115047	0.039842	1	0.199	FALSE	FALSE	FALSE	cyto	9652800	18154000	12592000	0	0	0	1762800	20839000	2833500	2	3	3	0	0	0	1	2	1
849	14-3-3 protein zeta/delta (Fragment) OS=Homo sapiens OX=9606 GN=YWHAZ PE=1 SV=1;14-3-3 protein zeta/delta OS=Homo sapiens OX=9606 GN=YWHAZ PE=1 SV=1;cDNA FLJ50142, highly similar to 14-3-3 protein zeta/delta (Protein kinase Cinhibitor protein 1) OS=Homo sa	E7EX29	YWHAZ	28.036	-0.0767	-1.03	0.946872	0.380518	1	0.513	FALSE	FALSE	FALSE	other	6603200	9499200	0	0	0	0	0	8363400	0	2	1	0	0	2	0	1	2	0
850	Transcription factor YY2 OS=Homo sapiens OX=9606 GN=YY2 PE=2 SV=1;Transcriptional repressor protein YY1 OS=Homo sapiens OX=9606 GN=YY1 PE=1 SV=2	O15391	YY2	41.347	0.985	1.18	0.269598	0.192774	1	0.443	FALSE	FALSE	FALSE	nuc	0	0	0	0	0	0	696340	2600600	863520	0	0	0	0	0	0	1	2	1
851	Zinc finger CCCH-type antiviral protein 1 OS=Homo sapiens OX=9606 GN=ZC3HAV1 PE=1 SV=3;Zinc finger CCCH-type antiviral protein 1 OS=Homo sapiens OX=9606 GN=ZC3HAV1 PE=1 SV=1	Q7Z2W4	ZC3HAV1	101.43	-1.04	-1.31	0.284293	0.186482	1	0.439	FALSE	FALSE	FALSE	cyto	0	6002500	0	0	0	0	0	0	0	0	3	0	0	0	0	0	0	0
852	Nuclear-interacting partner of ALK OS=Homo sapiens OX=9606 GN=ZC3HC1 PE=1 SV=1;Nuclear-interacting partner of ALK OS=Homo sapiens OX=9606 GN=ZC3HC1 PE=1 SV=1	C9J0I9	ZC3HC1	50.562	0.658	1.23	0.506864	0.231154	1	0.463	FALSE	FALSE	FALSE	nuc	0	0	0	0	0	0	0	0	3361200	0	0	0	0	0	0	0	1	1
853	Nucleolar protein of 40 kDa OS=Homo sapiens OX=9606 GN=ZCCHC17 PE=1 SV=1;Nucleolar protein of 40 kDa OS=Homo sapiens OX=9606 GN=ZCCHC17 PE=1 SV=1;Nucleolar protein of 40 kDa OS=Homo sapiens OX=9606 GN=ZCCHC17 PE=1 SV=1;Nucleolar protein of 40 kDa OS=Homo s	A0A087WYV3	ZCCHC17	20.451	0.00595	-0.0228	0.992688	0.971969	1	0.688	FALSE	FALSE	FALSE	other	1199400	0	0	0	0	0	0	0	0	1	0	0	0	0	0	0	0	0
854	HCG2042749, isoform CRA_d OS=Homo sapiens OX=9606 GN=ZFP91-CNTF PE=4 SV=1;E3 ubiquitin-protein ligase ZFP91 OS=Homo sapiens OX=9606 GN=ZFP91 PE=1 SV=1	A0A0A6YYC7	ZFP91-CNTF	59.57	0.305	1.1	0.735751	0.244147	1	0.468	FALSE	FALSE	FALSE	other	0	0	0	0	0	0	1706900	0	0	0	0	0	0	0	0	1	0	0
855	Zinc finger RNA-binding protein OS=Homo sapiens OX=9606 GN=ZFR PE=1 SV=2	Q96KR1	ZFR	117.01	0.931	2.92	0.481299	0.0486439	1	0.233	FALSE	FALSE	FALSE	nuc	0	0	0	0	0	0	0	11490000	6330900	0	0	0	0	0	0	0	3	2
856	Zinc finger protein with KRAB and SCAN domains 7 OS=Homo sapiens OX=9606 GN=ZKSCAN7 PE=1 SV=2;Zinc finger and SCAN domain-containing protein 21 OS=Homo sapiens OX=9606 GN=ZSCAN21 PE=1 SV=2;Zinc finger protein 525 OS=Homo sapiens OX=9606 GN=ZNF525 PE=1 SV=1	Q9P0L1	ZKSCAN7	85.032	0.996	1.21	0.382611	0.295506	1	0.486	FALSE	FALSE	FALSE	cyto	0	0	0	0	0	0	4446800	0	0	0	0	0	0	0	0	1	0	0
857	BUB3-interacting and GLEBS motif-containing protein ZNF207 (Fragment) OS=Homo sapiens OX=9606 GN=ZNF207 PE=1 SV=1;BUB3-interacting and GLEBS motif-containing protein ZNF207 OS=Homo sapiens OX=9606 GN=ZNF207 PE=1 SV=1;BUB3-interacting and GLEBS motif-contai	J3KS31	ZNF207	34.987	1.12	2.3	0.356278	0.0794327	1	0.317	FALSE	FALSE	FALSE	nuc	0	0	0	0	0	0	8094000	8053800	11409000	0	0	0	0	0	0	1	1	1
858	E3 SUMO-protein ligase ZNF451 OS=Homo sapiens OX=9606 GN=ZNF451 PE=4 SV=1	D6RB93	ZNF451	8.3542	0.929	0.0201	0.338247	0.983005	1	0.69	FALSE	FALSE	FALSE	nuc	0	0	0	0	2474500	0	0	0	0	0	0	0	0	1	0	0	0	0
859	Zinc finger protein 461 OS=Homo sapiens OX=9606 GN=ZNF461 PE=1 SV=1;cDNA FLJ54872, highly similar to Zinc finger protein 461 OS=Homo sapiens OX=9606 GN=ZNF461 PE=1 SV=1;Zinc finger protein 461 OS=Homo sapiens OX=9606 GN=ZNF461 PE=1 SV=1;Zinc finger protein	A0A087WV02	ZNF461	30.27	0.258	0.756	0.763303	0.387438	1	0.516	FALSE	FALSE	FALSE	other	0	693190	0	0	0	0	2033700	1880100	1568900	0	1	0	0	0	0	1	1	1
860	Zinc finger protein 669 OS=Homo sapiens OX=9606 GN=ZNF669 PE=2 SV=2;Zinc finger protein 669 (Fragment) OS=Homo sapiens OX=9606 GN=ZNF669 PE=1 SV=1	Q96BR6	ZNF669	52.596	0.585	2.73	0.735753	0.140409	1	0.403	FALSE	FALSE	FALSE	other	0	0	0	0	0	0	1217600	0	79906000	0	0	0	0	0	0	0	0	1
861	DNA annealing helicase and endonuclease ZRANB3 OS=Homo sapiens OX=9606 GN=ZRANB3 PE=1 SV=2	F5GYN7	ZRANB3	71.514	1.14	0.0731	0.128893	0.91619	1	0.678	FALSE	FALSE	FALSE	nuc	0	0	1319500	0	0	826650	0	0	0	0	0	1	0	0	1	0	0	0
862	Zinc finger and SCAN domain-containing protein 12 OS=Homo sapiens OX=9606 GN=ZSCAN12 PE=1 SV=1	O43309	ZSCAN12	70.222	1.03	0.658	0.180007	0.375008	1	0.511	FALSE	FALSE	FALSE	nuc	0	0	0	0	0	0	0	1281900	0	0	0	0	0	0	0	0	1	0
863	Zyxin (Fragment) OS=Homo sapiens OX=9606 GN=ZYX PE=1 SV=1;Zyxin (Fragment) OS=Homo sapiens OX=9606 GN=ZYX PE=1 SV=1;Zyxin OS=Homo sapiens OX=9606 GN=ZYX PE=1 SV=1	H7C3D3	ZYX	18.055	1.9	0.576	0.0754614	0.55475	1	0.581	FALSE	FALSE	FALSE	other	1628100	8642900	2021000	0	4317800	1433300	0	0	0	1	2	1	0	2	1	0	1	0
